# Supplementary material for: A generalized cortical activity pattern at internally generated mental context boundaries during unguided narrative recall
Source: eLife. 2022 May 30;11:e73693. doi: 10.7554/eLife.73693 (PMC9177147; doi:10.7554/eLife.73693)
Supplement: Figure 1—figure supplement 1—source data 1. [file elife-73693-fig1-figsupp1-data1.xlsx]

## Sheet: PMC_encoding
S1	0.13898	0.22527	0.33368	0.37834	0.32222	0.31477	0.18011	-0.0079643	-0.039639	0.087345	0.19987	0.23534	0.29382	0.30797	0.3361	0.46416	0.37659	0.46651	0.2671	0.25189	0.13044	0.21463	0.28999	0.4842	0.55469	0.37578	-0.018738	-0.27664	-0.41303	-0.61884	-0.64806	-0.66481	-0.49144	-0.41719	-0.59177	-0.92218	-0.99354	-1.0933	-0.94494	-0.74435	-0.56819	-0.4534	-0.31282	-0.2784	-0.25586	-0.25251	-0.15828	-0.065919	-0.0023464
S2	-0.080975	-0.083466	0.049722	0.15952	0.19547	0.12621	0.09167	0.1588	0.20429	0.33292	0.30356	0.19737	0.093627	0.10597	0.073863	0.14929	0.18403	0.03836	-0.033839	0.054574	0.058782	0.086686	0.12578	0.27442	0.65256	0.76111	0.5089	0.33321	0.14357	0.046777	0.0029708	0.083161	0.19872	0.14989	0.074553	0.0026742	0.073386	0.13142	0.072827	0.068987	-0.13395	-0.2367	-0.17138	-0.070163	0.02082	0.062566	0.20576	-0.061694	-0.24452
S3	-0.17001	-0.029551	0.014766	0.15604	0.21118	0.16193	0.23415	0.21099	0.12327	-0.012461	-0.048208	0.028186	0.039625	0.012526	0.049859	0.30619	0.41468	0.44377	0.44964	0.38703	0.4582	0.36625	0.43221	0.2407	0.1743	0.019262	-0.08725	-0.070326	-0.066031	-0.095126	-0.18454	-0.26185	-0.16002	-0.03317	-0.057456	-0.012642	0.035474	0.16792	0.24647	0.091327	-0.028833	-0.1259	-0.19696	-0.29499	-0.24802	-0.35595	-0.21207	-0.12165	-0.25258
S4	-0.2786	-0.20257	-0.22331	-0.096994	0.030553	0.0058389	0.10861	0.1503	0.22887	0.43521	0.4321	0.37005	0.31817	0.25193	0.17273	0.23685	0.36433	0.39392	0.43581	0.48796	0.46419	0.62696	0.71637	0.76531	0.78267	0.76958	0.66262	0.47755	0.32929	0.21517	0.028713	-0.14757	-0.12307	-0.090768	-0.15304	-0.36207	-0.68662	-0.69926	-0.67545	-0.66682	-0.69923	-0.932	-0.99506	-0.75826	-0.38227	-0.17125	-0.25121	-0.44084	-0.57164
S5	-0.014771	-0.13977	-0.067	0.029821	0.046038	0.1467	0.025548	0.05101	0.10839	-0.032146	-0.13313	-0.1127	-0.025842	0.030903	0.2314	0.30924	0.28586	0.073324	0.017653	-0.1086	-0.014051	0.017581	0.029688	0.18297	0.35214	0.52216	0.33385	0.088763	-0.084627	0.1099	-0.050162	-0.15846	-0.20798	-0.010559	0.046577	0.040782	0.10777	-0.16017	-0.36372	-0.52031	-0.44665	-0.2565	-0.24966	-0.13212	-0.1749	-0.10732	-0.12023	0.1152	0.049148
S6	0.12365	0.22721	0.39369	0.30176	0.35059	0.1774	0.24818	0.27007	0.33676	0.28215	0.053783	-0.22598	-0.34495	-0.19936	-0.053923	0.11219	0.053586	0.32538	0.23201	0.17218	0.087756	0.029226	0.082113	0.30084	0.39783	0.43329	0.62441	0.34624	0.011299	-0.17668	-0.082814	-0.15382	0.0029301	-0.1723	-0.11609	-0.39235	-0.34805	-0.41231	-0.073686	0.0011914	-0.0030973	-0.22002	-0.38224	-0.30217	-0.30566	-0.33349	-0.28565	-0.33431	-0.35237
S7	-0.094995	-0.035844	0.13121	0.25754	0.31743	0.18252	0.15973	0.12252	0.20643	0.20315	0.27292	0.1144	-0.033508	-0.11359	0.23324	0.39459	0.36283	0.31052	0.21523	0.11238	0.0063467	-0.025901	0.010997	0.18819	0.45737	0.42759	0.44087	0.11788	0.13697	0.036981	-0.023437	-0.26375	-0.29855	-0.26853	-0.36395	-0.47212	-0.6633	-0.51758	-0.5255	-0.35021	-0.25685	-0.33786	-0.51955	-0.52862	-0.38631	-0.30299	-0.015844	-0.033065	-0.018574
S8	0.20763	0.14893	0.13987	0.14227	0.15008	0.24902	0.27812	0.31894	0.25604	0.1589	0.07864	-0.025498	-0.039016	-0.056218	0.042776	0.12257	0.22858	0.29196	0.31876	0.27552	0.25436	0.29632	0.39741	0.53827	0.7196	0.50326	0.34755	0.26578	-0.047317	-0.2999	-0.2881	-0.32716	-0.15744	-0.079784	-0.039205	-0.13102	-0.17186	-0.12612	-0.25239	-0.24597	-0.25265	-0.30728	-0.32365	-0.14049	-0.085201	-0.20916	-0.36809	-0.35838	-0.19129
S9	0.12684	0.19098	0.25513	0.24112	0.10104	0.038114	0.076342	0.18919	0.29879	0.31398	0.24794	0.058086	-0.0098007	0.023131	0.28704	0.42239	0.54455	0.57789	0.4827	0.50485	0.58604	0.59946	0.62153	0.51735	0.5039	0.11843	0.17823	0.049698	0.094694	0.12634	0.086369	0.10612	0.070259	0.077164	-0.099868	-0.13029	-0.38808	-0.60093	-0.74423	-0.69162	-0.65247	-0.63775	-0.46376	-0.24068	0.042271	0.13434	0.015794	-0.082891	-0.19347
S10	0.38351	0.29593	0.26818	0.18355	0.085793	0.061637	0.14084	0.20424	0.26239	0.22164	0.078132	0.057743	-0.20867	-0.19433	-0.1568	-0.086168	0.097512	0.23271	0.19276	0.16832	0.069529	-0.0036415	0.14875	0.27619	0.45599	0.41672	0.36687	0.25989	0.042092	-0.12545	-0.56659	-0.93629	-1.1797	-1.2281	-1.2193	-1.2575	-1.3164	-1.3743	-1.3468	-1.2744	-1.0095	-0.81007	-0.59325	-0.54272	-0.46408	-0.385	-0.18254	-0.045806	0.146
S11	-0.15861	-0.001438	0.2087	0.15745	0.20464	0.19894	0.08991	0.049847	0.11569	-0.032405	0.010263	0.063781	-0.070915	-0.085177	-0.050135	0.056127	0.19493	0.47622	0.34013	0.22052	0.1146	0.14882	0.14309	0.29559	0.48556	0.60553	0.73682	0.60485	0.35492	0.38732	0.3059	0.20188	0.07799	0.13451	0.087545	-0.11451	-0.20949	-0.21334	-0.20248	-0.12735	-0.17551	0.010198	-0.3165	-0.15578	-0.12689	0.11149	0.035291	-0.10559	-0.28192
S12	-0.12766	-0.03544	0.0067954	0.066133	0.037564	0.049992	0.098887	0.1985	0.31649	0.44323	0.48591	0.39194	0.33685	0.23397	0.24039	0.22476	0.22224	0.37087	0.45499	0.42812	0.35141	0.12473	0.11142	0.16785	0.37945	0.65444	0.76199	0.65643	0.37534	0.16647	0.061037	-0.012205	-0.22596	-0.45158	-0.74488	-0.81234	-0.52754	-0.27219	-0.075931	-0.056454	-0.17578	-0.4172	-0.53908	-0.57289	-0.32388	-0.27698	-0.089994	0.0020511	-0.054689
S13	0.2585	0.37199	0.42617	0.40611	0.28733	0.33087	0.39208	0.47479	0.53652	0.53751	0.45147	0.37552	0.30518	0.41519	0.48346	0.59574	0.71061	0.68008	0.59778	0.54617	0.60282	0.5534	0.5242	0.52359	0.8054	0.88501	0.93267	0.71733	0.64913	0.38733	0.13369	0.11449	0.29179	0.11081	-0.25143	-0.60546	-0.85249	-0.79944	-0.72648	-0.70607	-0.663	-0.81384	-0.96092	-1.0199	-1.1463	-1.363	-1.3115	-1.1429	-0.97896
S14	0.0036506	0.16737	0.20891	0.35994	0.15442	-0.0081675	-0.10828	-0.13821	0.1039	0.19895	0.11351	0.039387	-0.16867	-0.0096296	0.19696	0.31248	0.39055	0.30944	0.25259	0.24243	0.35771	0.3493	0.43612	0.56122	0.70174	0.47769	0.56393	0.26063	0.014058	-0.30459	-0.43126	-0.42854	-0.37321	-0.54674	-0.41646	-0.34967	-0.23594	-0.16663	-0.074654	-0.31026	-0.35545	-0.33907	-0.26353	-0.23705	-0.37277	-0.56891	-0.63125	-0.42658	-0.19141
S15	0.023863	0.14478	0.18877	0.1679	0.071004	-0.019045	0.056308	0.047379	0.19985	0.16447	0.10219	0.10692	0.19788	0.16184	0.14563	0.14015	0.31363	0.36745	0.47695	0.39014	0.35893	0.43035	0.42684	0.6521	0.77681	0.58909	0.60751	0.36425	-0.13931	-0.5272	-0.44391	-0.60593	-0.81443	-0.87296	-0.90785	-0.99164	-1.058	-1.0801	-0.68987	-0.41826	-0.17061	-0.23577	-0.23494	-0.19137	-0.12177	-0.20338	-0.20689	-0.11094	-0.2099
[truncated: 12 more columns]

## Sheet: PMC_recall
S1	0.25406	0.27881	-0.10617	-0.1738	-0.065958	-0.21712	-0.35345	-0.057915	-0.41844	-0.36184	-0.29	0.043107	-0.19731	0.016791	-0.13491	0.095376	-0.19982	-0.075004	-0.20805	-0.19727	-0.15589	0.008615	0.13161	0.33541	0.34891	0.12778	-0.11858	-0.18369	-0.45963	-0.31321	-0.37877	-0.26308	-0.33381	-0.38683	-0.19811	-0.071387	0.078505	0.019348	-0.37229	-0.28447	-0.27078	-0.090351	-0.047062	0.29305	0.017403	0.27472	0.084789	0.092026	0.19828
S2	-0.13254	-0.03313	0.050965	0.073735	-0.045657	0.022286	0.017333	-0.082552	-0.12936	-0.11614	-0.23151	-0.37554	-0.58953	-0.39437	-0.15388	0.16597	0.1707	0.2733	0.21995	0.06453	-0.19175	-0.19779	0.044271	0.41295	0.62843	0.56864	0.51892	0.26286	0.45929	0.38015	0.17499	-0.0059593	-0.1369	-0.11004	-0.11203	-0.27371	-0.23506	-0.12009	0.043108	-0.10968	-0.13489	-0.14168	-0.13426	-0.0022755	-0.058178	-0.11111	-0.13738	-0.047021	0.090733
S3	-0.005864	0.14212	-0.052204	0.0097077	0.011795	0.038526	0.041391	0.0079643	0.032308	0.11541	-0.011974	0.12592	0.049462	-0.0091776	-0.12478	-0.14314	-0.15281	-0.088651	0.12439	0.074092	0.38455	0.049795	0.1644	0.33247	0.28693	0.31264	0.24299	0.26017	-0.077779	-0.26487	-0.38229	-0.49807	-0.67452	-0.5591	-0.35863	-0.18829	-0.069991	-0.029532	-0.015501	-0.047336	0.20399	-0.025011	-0.16508	0.19108	0.29066	0.096908	-0.20361	0.074513	0.11736
S4	-0.18535	-0.19125	0.1184	0.16838	0.35179	0.42245	0.30495	0.19157	0.19954	0.41701	0.24454	0.17733	0.048036	0.061815	0.11531	0.081923	-0.059504	-0.12921	0.1613	0.37355	0.56094	0.56448	0.64244	0.2953	0.226	0.0016026	-0.35397	-0.5166	-0.493	-0.75615	-1.1549	-1.3728	-1.0393	-0.64712	-0.45709	-0.41026	-0.50693	-0.27174	-0.10239	-0.073425	0.012758	-0.10402	-0.18907	-0.12009	0.13837	0.42217	0.32872	0.36727	0.43031
S5	0.24272	0.23329	0.32125	0.11453	-0.19316	-0.11874	0.21808	0.17151	0.26238	0.08656	0.077917	0.083062	0.065906	0.40039	0.42204	0.19078	0.17047	0.2146	0.30602	0.27798	0.3193	0.56762	0.63521	0.89496	0.61025	0.24147	-0.042971	-0.0093884	-0.206	-0.38512	-0.49028	-0.33708	-0.44565	-0.64092	-0.59036	-0.49001	-0.55801	-0.43999	-0.52619	-0.32284	-0.24614	-0.077289	-0.16347	-0.27705	-0.2086	-0.17951	-0.18922	-0.13917	-0.022839
S6	0.020985	0.12021	0.1142	-0.028508	0.10112	0.054978	-0.0061437	-0.070536	-0.056487	0.082783	0.073161	0.12181	0.1482	-0.091179	-0.1366	-0.13826	-0.19243	0.030398	0.11051	-0.077137	-0.14145	-0.024639	0.12589	0.40242	0.58826	0.64374	0.63181	0.366	0.21734	0.16419	0.047151	-0.17315	-0.17383	0.13251	0.10337	-0.30805	-0.36313	-0.2672	-0.20519	-0.20334	-0.17288	-0.19232	0.022683	0.17478	-0.0045503	0.15437	0.13813	0.14795	0.11151
S7	0.11782	0.0046873	0.084944	-0.017576	0.048098	0.09083	0.14653	0.37079	0.4463	0.43022	0.19443	-0.019695	0.021816	0.16558	0.13956	0.14624	0.2298	0.096933	0.0026331	0.11193	0.33756	0.45392	0.32565	0.19144	-0.10807	-0.53758	-0.73468	-0.66411	-0.84308	-0.53527	-0.43538	-0.2054	-0.02245	0.15588	0.21496	0.29087	0.34483	0.11135	0.075889	0.27182	0.29511	0.20563	0.089135	0.19007	0.051301	-0.14118	-0.26833	-0.086337	-0.10406
S8	-0.013484	-0.031559	0.039714	0.18777	0.065344	-0.05681	-0.13494	-0.016058	-0.20028	-0.17669	0.0047389	0.17576	0.072019	-0.085898	-0.18067	-0.25669	-0.22089	-0.16319	-0.12602	-0.01578	-0.030372	0.014521	0.23392	0.42845	0.62131	0.49338	0.49041	0.7104	1.0725	1.3201	1.1675	0.93872	0.47327	0.14301	-0.19138	-0.21373	-0.15311	-0.12978	-0.21408	-0.28008	-0.4131	-0.59723	-0.77585	-0.85456	-0.82302	-0.72458	-0.70981	-0.64893	-0.43117
S9	0.18661	0.22999	0.16647	0.30577	0.49348	0.3466	0.030113	-0.025062	-0.14852	-0.090823	0.038503	0.37186	0.43785	0.23022	-0.051415	0.25734	0.20058	0.13135	-0.1365	-0.35872	-0.24443	0.044885	0.18503	0.14726	0.057096	0.049018	-0.11691	-0.28953	-0.25544	-0.37282	-0.43499	-0.57479	-0.52253	-0.51148	-0.55579	-0.1715	-0.02891	-0.16314	-0.098809	-0.064215	0.10086	-0.13964	-0.20144	-0.30929	-0.3335	-0.20213	-0.18454	-0.43964	-0.46139
S10	0.14698	-0.032999	-0.032569	0.06788	0.1877	0.098179	0.18737	0.15666	0.061388	0.094192	0.37664	0.46784	0.42861	0.063763	-0.072854	-0.11949	0.30523	0.157	-0.11316	-0.13101	0.026312	0.27852	0.23081	0.5594	0.59675	0.3678	0.26245	0.17324	0.11914	-0.060856	0.029423	-0.077605	-0.41537	-0.38496	-0.46131	-0.47351	-0.65764	-0.73135	-0.75205	-0.45882	-0.16596	-0.33118	-0.31646	-0.28367	0.10799	0.068131	0.13055	-0.051374	0.098505
S11	0.11159	0.091451	-0.051524	0.05063	0.23469	0.13448	0.090925	0.081353	0.056349	0.049553	0.081235	0.070289	0.10162	-0.075322	0.014963	0.19686	0.30072	0.23569	0.17218	0.12092	0.28088	0.28987	0.21316	0.44406	0.21141	0.11966	0.21451	0.18507	-0.14884	-0.35566	-0.55694	-0.38244	-0.47364	-0.33043	-0.052437	-0.016511	-0.32775	-0.14389	-0.17665	-0.278	-0.077395	-0.066348	-0.20243	-0.25836	-0.11403	0.085931	0.014191	-0.058516	0.071831
S12	-0.29362	-0.34896	-0.29549	-0.066081	0.012242	-0.074908	-0.17172	-0.10561	0.074207	0.11136	0.029379	0.11654	0.33978	0.46272	0.30938	0.34312	0.23798	-0.018398	-0.11055	0.16065	0.24985	0.45573	0.66549	0.91711	0.68093	0.39343	0.23457	0.060085	0.083248	-0.35751	-0.74219	-0.70849	-0.78939	-0.86222	-0.77845	-0.64965	-0.52671	-0.24598	-0.093841	0.0093001	-0.23597	-0.64269	-0.89358	-0.95191	-0.74221	-0.6776	-0.32104	0.11086	0.31639
S13	0.11921	0.049206	-0.26802	-0.34337	-0.24797	-0.022941	0.094159	0.21655	0.23946	0.27355	-0.099308	-0.50797	-0.49755	-0.61253	-0.35884	0.068076	0.23051	0.030362	-0.074866	-0.13751	0.1695	0.48677	0.67627	0.67623	0.65947	0.37803	-0.17948	-0.26054	-0.34748	-0.39061	-0.46501	-0.62844	-0.68523	-0.39995	-0.17803	-0.59763	-0.61724	-0.43318	-0.35927	-0.19962	-0.15282	-0.11481	-0.27589	-0.26067	-0.13058	0.041594	-0.079897	-0.37105	-0.20913
S14	0.027952	-0.092537	-0.16734	-0.27824	0.0099053	0.054051	0.30314	0.14911	0.12134	0.071285	0.25378	0.2746	0.15958	0.015713	-0.046871	0.047379	-0.11974	-0.22199	-0.034085	0.13762	0.45551	0.3622	0.53761	0.52485	0.21139	-0.1741	-0.38952	-0.47025	-0.5725	-0.70764	-0.60803	-0.66501	-0.70519	-0.82283	-0.61741	-0.50941	-0.19377	-0.034595	0.013541	0.14379	0.15983	0.12535	0.025564	0.13959	0.27031	0.34055	0.17718	0.070634	0.055813
S15	-0.052374	0.066496	-0.065838	-0.088227	0.31447	0.26181	0.22206	0.18103	0.19003	-0.067577	0.18545	0.35974	0.30717	0.15754	0.24108	0.22244	0.2011	-0.036142	-0.010005	-0.070961	0.038098	-0.15957	-0.14603	0.14531	0.12552	-0.13953	-0.43177	-0.5222	-0.61727	-0.73859	-0.67846	-0.40216	-0.40554	-0.58888	-0.42448	-0.49841	-0.34731	-0.24618	-0.22412	-0.033633	-0.3038	-0.12527	-0.15942	-0.086658	0.28923	0.22268	0.088852	-0.041687	0.30948
[truncated: 12 more columns]

## Sheet: ANG_encoding
S1	0.19044	0.24334	0.39537	0.44524	0.32625	0.28408	0.23944	0.15419	0.13967	0.17857	0.18085	0.25838	0.20777	0.21172	0.25732	0.3775	0.28114	0.33744	0.24252	0.12728	0.078144	0.16746	0.28203	0.4233	0.4491	0.162	-0.14609	-0.4382	-0.63084	-0.83766	-0.8989	-0.85286	-0.66528	-0.58408	-0.75524	-0.9619	-0.96174	-0.97955	-0.8685	-0.74397	-0.68334	-0.54515	-0.4347	-0.29986	-0.22546	-0.22953	-0.17917	0.0093653	0.0079614
S2	0.083266	0.042427	0.084927	0.09237	0.18793	0.15152	0.1437	0.15844	0.25757	0.35152	0.28654	0.17358	0.22426	0.29646	0.22017	0.27824	0.2522	0.11927	-0.077168	-0.088614	-0.030918	0.026984	0.033415	0.1823	0.37279	0.45109	0.1509	-0.090731	-0.26356	-0.2022	-0.1497	-0.092263	0.008926	-0.012996	-0.19218	-0.17292	-0.1333	-0.05042	-0.053921	-0.1016	-0.29141	-0.421	-0.31799	-0.25171	-0.15105	-0.25807	-0.029954	-0.2337	-0.3241
S3	-0.029949	0.064266	0.058799	0.088487	0.17596	0.24398	0.30384	0.26539	0.12379	0.056378	-0.04198	0.030291	0.049229	-0.018857	4.8579e-06	0.2106	0.3332	0.45443	0.41892	0.44099	0.40534	0.3615	0.37956	0.098466	-0.11078	-0.25948	-0.20918	-0.20848	-0.28397	-0.17044	-0.20302	-0.29657	-0.21397	-0.021829	0.02517	-0.029239	-0.060603	0.093296	0.15901	0.068	-0.027176	-0.14523	-0.34752	-0.3286	-0.35838	-0.51216	-0.44015	-0.24217	-0.28882
S4	-0.054378	-0.043655	-0.094058	0.040112	0.077866	0.055112	0.19733	0.2505	0.34393	0.38846	0.27492	0.20244	0.22517	0.28851	0.26342	0.40042	0.4415	0.45463	0.44455	0.4415	0.38225	0.49269	0.52206	0.49488	0.5422	0.33737	0.060075	-0.04611	-0.12189	-0.15322	-0.35067	-0.43985	-0.37928	-0.42234	-0.39661	-0.46564	-0.74057	-0.65084	-0.56113	-0.7253	-0.83958	-1.1558	-1.2021	-0.90118	-0.56272	-0.31758	-0.37952	-0.54542	-0.57465
S5	0.17079	0.071984	0.14751	0.25524	0.2942	0.27876	0.21226	0.19502	0.23419	0.05506	-0.021252	-0.040872	0.06246	0.069762	0.26427	0.28585	0.27835	0.1036	-0.0012551	-0.082409	-0.13209	-0.057519	-0.18723	-0.11143	-0.024445	0.036743	-0.17784	-0.44217	-0.50938	-0.47099	-0.66454	-0.63729	-0.62551	-0.21616	-0.046716	-0.12484	-0.036468	-0.31251	-0.44105	-0.58907	-0.4831	-0.34811	-0.36184	-0.28111	-0.40087	-0.25041	-0.20728	0.1151	0.053508
S6	0.12849	0.17168	0.24152	0.17028	0.30144	0.24656	0.33106	0.32411	0.23397	0.20151	0.097268	0.078835	-0.03379	0.050865	0.19149	0.23578	0.10599	0.3004	0.2074	0.11535	0.056247	-0.036342	-0.0824	-0.054707	-0.087214	-0.17658	-0.21851	-0.3963	-0.37271	-0.44031	-0.55689	-0.83259	-0.6344	-0.49974	-0.24714	-0.4153	-0.37562	-0.54567	-0.25911	-0.09079	-0.079896	-0.29953	-0.37625	-0.31023	-0.20352	-0.23729	-0.2982	-0.41759	-0.53318
S7	0.0017175	-0.063581	0.063469	0.21447	0.24999	0.1704	0.16597	0.13899	0.29332	0.31001	0.16323	-0.070879	-0.23879	-0.041401	0.30647	0.61085	0.52504	0.21512	-0.017083	-0.13455	-0.083197	-0.10133	-0.08169	0.0015206	0.25833	0.32358	0.24839	0.007716	-0.086822	-0.1407	-0.2328	-0.40412	-0.49392	-0.52293	-0.65005	-0.87386	-1.0604	-0.83034	-0.74791	-0.52957	-0.32333	-0.28301	-0.3581	-0.39646	-0.25714	-0.19326	-0.019497	-0.054926	-0.15415
S8	0.41402	0.39074	0.33843	0.21908	0.17966	0.26603	0.34649	0.37175	0.30906	0.13902	-0.029126	-0.15939	-0.15417	-0.061632	0.070697	0.13548	0.12913	0.18236	0.17518	0.13886	0.15141	0.14277	0.17923	0.19094	0.20647	0.025644	-0.17998	-0.26915	-0.46796	-0.60433	-0.4712	-0.39068	-0.092364	-0.0025478	0.13573	0.23365	0.29821	0.25506	0.053646	0.0077661	0.0059976	0.016769	0.024542	0.096777	0.071575	-0.089023	-0.31438	-0.26224	-0.17115
S9	0.24528	0.39457	0.39099	0.26068	0.15515	0.087719	0.24991	0.38049	0.44333	0.31798	0.20512	0.10066	0.11397	0.17715	0.29183	0.51945	0.58972	0.63401	0.59236	0.63236	0.6627	0.62509	0.66039	0.26614	0.23793	-0.10084	-0.029868	-0.2047	-0.30553	-0.24068	-0.28259	-0.31699	-0.44802	-0.39652	-0.65073	-0.54807	-0.61704	-0.75813	-0.91765	-0.8903	-0.78424	-0.78433	-0.68981	-0.6113	-0.40644	-0.35067	-0.40368	-0.44019	-0.5652
S10	0.35608	0.33057	0.21406	0.078468	-0.024267	-0.0863	0.01981	0.0536	0.11459	0.069166	-0.073601	-0.041116	-0.22801	-0.22431	-0.16964	-0.014667	0.18486	0.19071	0.18456	0.074424	-0.10717	-0.16932	0.042155	0.16323	0.29655	0.26746	0.064383	-0.046349	-0.25914	-0.31785	-0.68089	-1.0172	-1.2741	-1.3712	-1.2946	-1.3501	-1.4521	-1.4921	-1.3928	-1.235	-0.9779	-0.81753	-0.61838	-0.5821	-0.52356	-0.34872	-0.16077	-0.0040386	0.1573
S11	0.056341	0.22698	0.42338	0.1547	0.17457	0.11216	0.1833	0.22918	0.18626	0.075783	0.072819	0.046397	-0.07536	-0.083149	0.041627	0.12468	0.21418	0.44595	0.28464	0.17213	0.14181	0.059341	0.086156	0.11482	0.17317	0.17896	0.095862	0.08425	-0.083569	0.015089	-0.074175	-0.14417	-0.093852	-0.13422	-0.16536	-0.29795	-0.37332	-0.32944	-0.23996	-0.10058	-0.061122	0.032994	-0.22224	-0.12517	-0.037758	0.027684	0.059354	-0.13917	-0.34764
S12	-0.065806	-0.062271	0.075873	0.10188	0.17758	0.1879	0.24288	0.34176	0.4686	0.59388	0.58424	0.54515	0.46886	0.35291	0.42749	0.38965	0.38247	0.43397	0.52636	0.38901	0.34455	0.0079139	0.11988	0.17793	0.41578	0.5674	0.50318	0.39234	0.066031	-0.09328	-0.17851	-0.29336	-0.45978	-0.67408	-0.83142	-0.78943	-0.50599	-0.20791	-0.055525	-0.16864	-0.27268	-0.54717	-0.67765	-0.77198	-0.41618	-0.30748	-0.19652	-0.076913	-0.3085
S13	0.2769	0.41019	0.43306	0.42359	0.31454	0.3341	0.36651	0.4401	0.45562	0.47246	0.34495	0.30946	0.27773	0.38672	0.50191	0.52166	0.65836	0.64973	0.54916	0.4935	0.51194	0.47568	0.41436	0.31815	0.64209	0.69343	0.73897	0.50728	0.35282	0.23697	-0.013555	0.06884	0.17357	-0.12727	-0.34308	-0.77778	-0.90618	-0.89145	-0.78913	-0.73952	-0.75287	-0.89972	-1.0623	-1.0747	-1.2551	-1.2128	-1.2552	-1.0103	-0.96834
S14	0.099935	0.17757	0.19217	0.24422	0.069007	-0.085077	-0.15991	-0.08424	0.0048823	0.060275	0.035641	0.033977	-0.069036	0.030045	0.21211	0.35736	0.4648	0.44062	0.33296	0.27673	0.33201	0.27217	0.34753	0.43673	0.54225	0.15856	0.03317	-0.12816	-0.36943	-0.5163	-0.51222	-0.55929	-0.51974	-0.5346	-0.51533	-0.36896	-0.26091	-0.24635	-0.17642	-0.27252	-0.3268	-0.40966	-0.42452	-0.36517	-0.45844	-0.53372	-0.61669	-0.47361	-0.30654
S15	0.35982	0.35473	0.27166	0.25663	0.24942	0.23961	0.26268	0.30424	0.39221	0.26315	0.13996	0.29167	0.25238	0.39562	0.4254	0.37381	0.44339	0.3669	0.27134	0.27051	0.35564	0.41284	0.31134	0.57183	0.62251	0.30373	0.23771	-0.095058	-0.57453	-0.84624	-0.83647	-1.0077	-1.1389	-1.1461	-1.1543	-1.103	-1.0816	-1.0057	-0.79923	-0.48912	-0.40548	-0.55352	-0.4811	-0.40069	-0.3198	-0.18443	-0.26015	-0.24952	-0.38768
[truncated: 12 more columns]

## Sheet: ANG_recall
S1	0.20916	0.23412	-0.042301	-0.22899	-0.010854	-0.18919	-0.35117	-0.1037	-0.3516	-0.40217	-0.24546	0.14686	0.013677	0.14385	0.041002	0.15644	-0.042809	0.14044	-0.023544	-0.044527	-0.10442	-0.11068	-0.1283	0.031451	0.18919	-0.075038	-0.2328	-0.32885	-0.55137	-0.40752	-0.4142	-0.33007	-0.29242	-0.29872	-0.21289	-0.11492	0.054568	0.03067	-0.19432	-0.17676	-0.14298	-0.064562	-0.098249	0.28334	0.082785	0.21173	0.11147	0.14843	0.2139
S2	0.0056828	0.017253	0.13443	0.13173	-0.10436	-0.011808	0.0725	-0.073762	-0.27418	-0.12745	-0.1411	-0.27631	-0.47669	-0.3541	-0.024611	0.29289	0.45278	0.40341	0.25273	0.018642	-0.23872	-0.33261	-0.10892	0.23016	0.40535	0.12348	0.015119	-0.1503	0.083937	0.1297	-0.067299	-0.11214	-0.1791	-0.11181	-0.048121	-0.21899	-0.3451	-0.18318	-0.017129	-0.086148	0.019329	0.022619	-0.02875	0.076793	0.061757	0.10735	0.17106	0.17565	0.16296
S3	-0.098254	0.018534	-0.051365	0.018168	0.016074	0.024402	0.035394	-0.021627	0.1519	0.089983	0.049443	0.18897	0.24849	0.0048042	-0.084447	-0.18965	-0.17331	-0.20367	0.055805	0.047587	0.24117	0.070977	0.24169	0.46666	0.29423	0.18403	0.17305	0.34023	-0.010087	-0.17256	-0.26177	-0.4449	-0.67193	-0.55241	-0.37352	-0.18682	-0.042277	0.20313	0.13059	0.17562	0.36581	0.16323	-0.011093	0.28873	0.29054	0.15233	-0.12909	0.1241	0.18299
S4	-0.10018	-0.28187	0.027709	0.1829	0.3217	0.37206	0.17986	0.18305	0.26005	0.40213	0.3634	0.33266	0.15554	0.17462	0.18919	0.21465	0.28026	0.20375	0.15393	0.074751	0.13246	-0.2135	-0.16899	-0.35487	-0.35904	-0.55339	-0.85728	-0.95283	-0.79231	-1.0055	-1.2607	-1.3863	-0.83595	-0.57295	-0.45784	-0.49458	-0.48306	-0.29392	-0.13991	-0.17769	-0.18972	-0.27597	-0.23225	-0.035988	0.29876	0.38825	0.33107	0.3816	0.40122
S5	0.45653	0.46373	0.56906	0.32128	0.042954	0.15932	0.35572	0.34399	0.38965	0.33598	0.20116	0.30854	0.3013	0.44726	0.49916	0.21526	0.20948	0.20308	0.26926	0.23634	0.44203	0.58054	0.62297	0.59021	0.25634	-0.038667	-0.26327	-0.3323	-0.63393	-0.76918	-0.69827	-0.50303	-0.60659	-0.85067	-0.87161	-0.67696	-0.67624	-0.49443	-0.56393	-0.57549	-0.34792	-0.067259	-0.25185	-0.32157	-0.22061	-0.22993	-0.28839	-0.15979	-0.077358
S6	0.094982	0.13657	0.1151	-0.053689	0.10252	-0.039796	-0.1562	-0.22203	-0.13788	0.11758	0.097032	0.14233	0.15256	-0.043628	-0.037268	0.00064559	-0.12723	-0.018424	0.094281	-0.031088	-0.0738	-0.0038025	-0.11652	-0.017139	0.14796	0.15685	0.23361	0.20589	0.055608	0.09186	0.035306	-0.21341	-0.29577	0.14204	0.11604	-0.18984	-0.078657	0.027048	0.0086357	-0.034319	0.040692	-0.031507	0.1593	0.23124	0.15509	0.21455	0.31353	0.084757	0.048465
S7	0.062499	0.066927	0.13149	0.12337	0.13409	0.10027	0.19026	0.38819	0.42232	0.35151	0.14608	0.10609	0.075044	0.14002	0.099301	0.093308	0.2058	0.11047	0.026922	-0.023021	0.13138	0.2176	0.17887	0.096165	-0.2385	-0.65322	-0.74592	-0.69723	-0.88105	-0.48419	-0.4251	-0.27263	-0.03449	0.12347	0.18823	0.31679	0.28588	0.055424	-0.050136	0.19175	0.13592	0.21878	-0.099948	0.072343	0.082454	0.037238	-0.040536	0.044427	0.17347
S8	0.1736	0.14137	0.14932	0.29732	0.22029	0.048924	0.0099153	0.049588	-0.10428	-0.094987	0.02048	0.11152	0.038514	-0.075569	-0.11891	-0.10196	-0.062406	-0.048114	-0.073129	-0.039599	0.030384	-0.077157	0.087254	0.28759	0.4319	0.18205	0.20856	0.41067	0.76303	1.0654	1.0173	0.77702	0.49465	0.21398	0.021622	0.015557	0.01365	0.016041	-0.12302	-0.064519	-0.17025	-0.44672	-0.56891	-0.72981	-0.72854	-0.62212	-0.65497	-0.7375	-0.54764
S9	0.12267	0.15971	0.18339	0.1966	0.47479	0.39732	0.31251	0.18251	0.084414	0.073971	0.037632	0.27551	0.3502	0.29381	0.16177	0.4219	0.31279	0.19392	-0.13288	-0.18153	-0.20676	0.040186	0.0074976	-0.1695	-0.1084	-0.117	-0.18881	-0.36652	-0.47011	-0.66819	-0.59193	-0.67164	-0.59842	-0.5298	-0.53525	-0.24116	-0.11417	-0.18626	-0.18224	0.060986	0.014655	-0.14006	-0.13042	-0.28484	-0.16142	-0.16213	0.018294	-0.2163	-0.40472
S10	0.065737	-0.13214	-0.10655	-0.024379	0.10246	0.14394	0.32778	0.36904	0.10807	0.099675	0.28591	0.25242	0.19778	-0.0083747	-0.062891	-0.015865	0.39477	0.33358	0.01593	-0.072835	0.0090144	0.086457	-0.0071903	0.22528	0.058495	-0.044526	-0.12082	-0.12696	-0.15674	-0.31598	-0.1808	-0.21194	-0.41016	-0.25361	-0.25609	-0.29528	-0.43058	-0.44627	-0.4932	-0.29911	-0.10339	-0.13268	-0.069259	0.054354	0.31826	0.30126	0.24007	0.28062	0.3778
S11	-0.0078082	-0.11138	-0.075299	-0.03217	0.24586	0.13187	0.10936	0.15827	0.070501	-0.035388	0.059091	0.16134	0.15467	-0.021317	0.068281	-0.016564	0.096268	0.18834	0.10692	0.15746	0.15701	0.11814	0.067243	0.1918	0.044868	-0.11947	-0.03863	-0.097521	-0.28934	-0.44169	-0.56449	-0.31339	-0.43103	-0.3405	0.02846	0.055263	-0.32013	-0.17724	-0.19121	-0.1658	0.0029894	0.0026585	-0.11482	-0.22313	-0.17063	0.064141	-0.062003	0.013601	0.17534
S12	-0.17448	-0.28151	-0.14974	0.12831	0.15812	-0.059813	-0.14874	-0.037448	0.16605	0.12243	0.17581	0.30578	0.53661	0.59392	0.42268	0.41741	0.28179	0.035456	-0.08401	0.10776	0.11232	0.069908	0.21775	0.50439	0.26267	-0.0081009	0.023282	-0.37946	-0.34475	-0.59237	-0.86337	-0.77444	-0.76841	-0.7631	-0.73222	-0.58067	-0.48699	-0.31006	-0.17295	0.011193	-0.17778	-0.45213	-0.7411	-0.82508	-0.65117	-0.69775	-0.3072	0.092836	0.30979
S13	0.084161	-0.077576	-0.29342	-0.25439	-0.23944	-0.080565	0.091023	0.13833	0.13643	0.22289	-0.046475	-0.33061	-0.25241	-0.48023	-0.22528	0.060824	0.17594	-0.080041	-0.098367	-0.032222	0.16951	0.46411	0.52898	0.35296	0.33551	-0.061854	-0.62194	-0.59719	-0.48931	-0.51445	-0.50976	-0.64438	-0.85733	-0.49418	-0.20099	-0.37077	-0.45801	-0.25571	-0.21797	-0.1362	-0.18342	-0.16394	-0.15271	-0.32437	-0.24431	-0.024886	-0.062364	-0.25799	-0.20397
S14	-0.099249	-0.085227	-0.083247	-0.098631	0.062541	0.15769	0.24033	0.29961	0.30079	0.061915	0.26975	0.3865	0.34481	0.15123	-0.14661	0.049143	0.0010479	-0.11821	-0.0612	-0.088939	0.25108	0.28816	0.19551	0.14926	-0.020868	-0.43286	-0.6213	-0.54159	-0.67684	-0.74377	-0.57867	-0.54262	-0.4957	-0.53852	-0.50514	-0.33084	-0.034547	-0.0079135	-0.016219	0.1016	0.086066	0.057122	-0.079645	0.063098	0.1556	0.16304	0.09214	0.19213	0.17618
S15	0.075726	0.29314	0.11778	0.16962	0.3	0.052225	0.18891	0.23548	0.14147	0.15022	0.23242	0.27485	0.33611	0.37097	0.39029	0.2641	0.28043	0.1298	0.097897	0.021574	0.22238	-0.038066	-0.36486	-0.15771	-0.29032	-0.56828	-0.56386	-0.6454	-0.6972	-0.65509	-0.65842	-0.35877	-0.42118	-0.43794	-0.23431	-0.2315	-0.24725	-0.24964	-0.2045	0.065504	-0.12039	-0.086901	0.0086619	-0.053925	0.2589	0.19766	0.18538	0.15983	0.28684
[truncated: 12 more columns]

## Sheet: AUD_encoding
S1	0.19624	0.21579	0.14796	0.14308	0.15252	0.15073	0.081178	0.030568	0.12279	0.15893	0.17598	0.19018	0.17452	0.182	0.20338	0.30966	0.27756	0.33193	0.20425	0.12458	-0.026035	-0.084895	0.05855	0.24795	0.06294	-0.37642	-0.4918	-0.55528	-0.66905	-0.78071	-0.84016	-0.68279	-0.70778	-0.85102	-1.0236	-0.95677	-0.83672	-0.85112	-0.64227	-0.43917	-0.35207	-0.30471	-0.28401	-0.26824	-0.20141	-0.011148	0.28284	0.37159	0.28993
S2	0.11901	0.20589	0.19041	0.14435	0.046779	0.038752	0.0145	0.033744	0.13773	0.27422	0.1696	0.025053	-0.010819	0.040411	0.10614	0.13021	0.18701	0.054727	-0.12057	-0.094555	-0.14445	-0.24299	-0.21972	-0.23848	-0.4017	-0.85545	-1.1974	-1.0075	-0.71654	-0.51785	-0.42571	-0.29292	-0.17555	-0.16932	-0.31101	-0.35105	-0.19361	-0.18689	-0.13335	-0.15626	-0.12272	-0.12221	-0.048448	-0.12017	-0.057773	0.082853	0.30985	0.17808	0.113
S3	0.17109	0.15725	0.24414	0.28867	0.18459	0.15286	0.13801	0.11962	0.14814	0.069934	0.10004	0.20007	0.15169	0.12544	0.14406	0.20632	0.16508	0.09065	-0.07819	-0.19737	-0.20321	-0.30482	-0.23635	-0.28065	-0.43104	-0.84247	-0.97933	-0.83931	-0.7584	-0.5244	-0.36048	-0.23812	-0.16285	-0.063727	-0.089317	-0.11391	-0.049208	0.029018	0.046298	-0.072311	-0.24769	-0.28931	-0.30791	-0.48207	-0.54835	-0.56668	-0.48399	-0.3946	-0.24639
S4	-0.023969	-0.023165	-0.048328	0.14709	0.11007	0.015239	0.063154	0.097763	0.15554	0.21061	0.21308	0.19898	0.17336	0.10613	0.025277	0.16173	0.081792	0.0076419	0.094934	0.097838	0.03883	0.1049	0.15949	0.071789	-0.0088925	-0.33115	-0.58573	-0.57118	-0.39687	-0.12376	-0.10483	-0.11081	-0.041219	-0.23285	-0.25973	-0.28486	-0.33222	-0.13949	-0.16142	-0.30379	-0.34768	-0.56871	-0.58999	-0.46077	-0.39448	-0.2248	-0.21733	-0.16378	-0.099204
S5	0.2726	0.21195	0.24626	0.23491	0.069802	0.009641	0.087798	0.13338	0.18213	0.11182	0.10417	0.097037	-0.016317	0.13519	0.26785	0.25407	0.1494	-0.11443	-0.1673	-0.17395	-0.16438	-0.097463	-0.26818	-0.34462	-0.41174	-0.6175	-0.31954	-0.27347	-0.4504	-0.45858	-0.26829	-0.0046719	0.11983	0.20788	0.1203	-0.099688	0.11398	0.18826	0.088281	-0.13946	-0.24378	-0.012915	-0.22669	-0.23855	-0.21483	-0.0025611	-0.0032287	0.013641	0.049832
S6	0.224	0.26672	0.28455	0.21644	0.21292	0.20442	0.15706	0.14812	0.18406	0.16815	0.062202	0.017743	-0.015046	0.06709	0.13237	0.031077	0.03541	0.055865	0.10733	0.11063	0.08078	0.059732	0.02547	-0.061521	-0.37026	-0.46556	-0.20827	-0.1225	-0.16036	-0.046619	0.20628	0.29574	0.1833	-0.047478	-0.24318	-0.21535	0.017961	0.024835	0.013269	-0.12743	-0.26024	-0.30152	-0.39059	-0.48218	-0.40211	-0.18677	-0.031311	-0.20639	-0.27618
S7	-0.019344	0.069038	0.19732	0.18122	0.20079	0.12718	0.18345	0.33345	0.41547	0.26649	0.21947	0.080838	-0.01538	0.0097727	0.076068	0.15173	0.080718	0.092312	-0.0020835	-0.21539	-0.20602	-0.15454	-0.077901	-0.1235	-0.33897	-0.92823	-0.93179	-0.57621	-0.14471	-0.17884	-0.40967	-0.26296	0.005629	0.20889	-0.050399	-0.17227	-0.15569	0.11495	0.19602	0.30915	0.18329	0.097302	0.019037	-0.21081	-0.0068759	0.024809	0.14499	0.10398	0.13207
S8	0.15324	0.095074	0.064742	-0.042567	-0.064052	0.097543	0.16023	0.20692	0.19433	0.1117	0.047291	0.0069294	-0.023135	0.0091595	0.046951	0.05825	0.052298	0.15699	-0.012369	-0.085574	-0.10268	-0.030272	0.02636	-0.13069	-0.23845	-0.60474	-0.76218	-0.64233	-0.57913	-0.35865	-0.12406	-0.015331	0.2897	0.24047	0.22549	0.21002	0.21642	0.22143	0.12775	0.13711	0.11575	-0.012544	-0.0039029	-0.031405	0.018217	0.011993	-0.017391	-0.031772	0.042775
S9	0.029208	0.059801	0.05331	0.12451	0.1307	0.078684	0.099078	0.11793	0.22964	0.30011	0.23919	0.20137	0.14873	0.11702	0.14337	0.17475	0.20233	0.16842	0.016406	0.069633	0.093668	-0.057065	0.064266	0.026399	-0.28947	-0.8762	-1.0316	-0.80653	-0.61573	-0.34625	-0.17411	-0.078823	0.054412	0.051129	-0.14481	-0.091157	0.1072	0.038651	0.046187	-0.016324	-0.02937	0.0016819	-0.063776	-0.21111	-0.22463	-0.17408	-0.16414	-0.15862	-0.12432
S10	0.32802	0.3903	0.21849	0.17678	0.026893	-0.049703	-0.052059	-0.037896	0.01358	0.069429	0.046485	0.10939	-0.17304	-0.25263	-0.29861	-0.25055	-0.12133	-0.22574	-0.27921	-0.28982	-0.21345	-0.22285	-0.040348	-0.14412	-0.10005	-0.48574	-0.50424	-0.47214	-0.45206	-0.46789	-0.66031	-0.84515	-1.0759	-1.0233	-1.154	-1.3316	-1.4104	-1.2867	-1.067	-0.85954	-0.56392	-0.40008	-0.24944	-0.26037	-0.13498	0.22545	0.27346	0.40591	0.28647
S11	0.20669	0.29225	0.48963	0.23333	0.23801	0.0090477	0.15174	0.20175	0.21027	0.23128	0.1695	0.16213	-0.027084	0.0056375	0.048133	0.23618	0.26652	0.338	0.071637	-0.020868	0.065614	-0.11302	-0.1093	-0.2602	-0.56885	-0.92328	-0.97985	-0.80055	-0.7027	-0.31548	-0.27121	-0.15078	0.015107	-0.022151	-0.11939	-0.29326	-0.10696	-0.078933	-0.041201	0.029279	-0.045938	0.068118	-0.39719	-0.43241	-0.42731	-0.35565	-0.089217	-0.2322	-0.11117
S12	-0.13872	0.016029	0.14293	0.18166	0.0054791	0.0095406	0.04407	0.13107	0.20483	0.17235	0.08476	0.067672	-0.030497	0.015987	0.071888	0.22241	0.27777	0.33545	0.25991	0.028524	-0.025192	-0.028078	0.013106	0.028449	-0.12088	-0.38585	-0.67742	-0.57419	-0.45955	-0.39006	-0.25979	-0.28724	-0.23785	-0.2766	-0.43107	-0.41334	-0.30602	-0.25389	-0.083226	0.17573	0.10365	-0.0134	-0.070426	-0.081651	0.016281	0.19271	0.1663	0.21908	-0.10864
S13	0.35289	0.45943	0.33746	0.38689	0.30104	0.27645	0.2805	0.33487	0.31637	0.34324	0.26075	0.38248	0.41587	0.41534	0.43808	0.2906	0.38085	0.23641	0.30335	0.31009	0.21002	0.2397	0.23645	-0.019721	-0.011254	-0.32574	-0.20377	-0.13569	-0.063218	0.15752	0.093872	0.4797	0.65433	0.41074	0.086355	-0.40731	-0.43871	-0.49855	-0.41065	-0.40988	-0.52809	-0.54531	-0.66531	-0.67786	-0.87283	-0.66279	-0.65996	-0.47805	-0.64562
S14	-0.028276	0.085154	0.23884	0.28037	0.14456	0.00026425	-0.16833	-0.17932	0.021355	0.10484	0.10504	0.035792	-0.14373	-0.18627	-0.12282	-0.093378	-0.028814	0.025585	-0.092626	-0.094719	-0.014328	-0.026914	0.1147	0.071867	-0.017063	-0.39476	-0.20653	-0.38716	-0.49913	-0.37951	-0.30037	-0.42668	-0.31024	-0.29903	-0.19454	-0.24871	-0.057545	-0.13416	0.0322	-0.023321	0.043892	0.042214	-0.10669	-0.22577	-0.35502	-0.3147	-0.13141	-0.010208	0.0075731
S15	0.31005	0.45922	0.3407	0.17719	0.075181	0.17875	0.1678	0.10805	0.15281	0.27476	0.20536	0.10671	-0.19724	-0.021934	0.032838	0.16076	0.16284	0.17053	0.19869	0.13833	0.098308	0.14015	0.10973	0.38077	0.077419	-0.55954	-0.55704	-0.57492	-0.64925	-0.64307	-0.77521	-0.76395	-0.84829	-0.7685	-0.86423	-0.74708	-0.73193	-0.58173	-0.43327	-0.40315	-0.42688	-0.41449	-0.42564	-0.36708	-0.47858	-0.18532	0.055518	-0.0058804	-0.22939
[truncated: 12 more columns]

## Sheet: AUD_recall
S1	0.16901	0.2045	-0.045917	-0.20993	-0.098842	-0.32748	-0.20014	-0.079784	-0.26043	-0.43871	-0.28839	0.050335	-0.012913	0.21901	-0.017348	0.074628	-0.13084	0.15563	0.22721	0.13859	0.039608	0.12942	0.14649	0.12191	0.038654	-0.28634	-0.50389	-0.59645	-0.72605	-0.37204	-0.33124	-0.28012	-0.3522	-0.24181	-0.040555	0.011668	0.062656	-0.036057	-0.24749	-0.15013	-0.21866	-0.047302	-0.066092	0.20115	-0.010706	0.020115	0.029888	0.071855	0.2114
S2	0.065276	0.056099	0.13159	0.18661	0.14053	0.12241	-0.11701	-0.21777	-0.088509	0.029389	-0.086593	-0.30754	-0.29044	0.070782	0.36354	0.3759	0.35082	0.44872	0.35997	0.055381	-0.027403	0.11701	0.27849	0.32089	0.2187	0.037819	-0.11882	-0.35328	-0.18335	-0.2344	-0.19964	-0.34387	-0.46945	-0.29332	-0.1423	-0.14686	-0.16375	-0.09576	-0.041558	-0.1114	0.062937	0.16565	0.1892	0.078227	-0.035807	0.042298	0.082474	0.10528	0.20783
S3	0.099171	0.17294	0.0056914	0.086523	0.24999	0.3341	0.25662	0.22424	0.18547	0.0089222	0.050445	0.090097	0.0818	0.087469	0.026556	-0.02371	-0.087803	-0.11947	-0.037494	-0.05617	0.11366	0.055476	0.32245	0.33961	0.081448	-0.10158	-0.10525	-0.12389	-0.49753	-0.44414	-0.4569	-0.53505	-0.4356	-0.23816	-0.12885	0.01784	0.075284	0.07623	0.060575	0.10455	0.034347	-0.047696	-0.096859	0.28466	-0.0023454	0.13317	-0.074901	0.13301	0.22195
S4	0.077538	0.077791	0.14271	0.1286	0.18151	0.1405	0.14403	0.14443	0.21653	0.21611	0.15885	0.17493	0.038285	0.091406	0.193	0.1264	0.085801	0.19473	0.31589	0.41003	0.54432	0.40867	0.39755	0.27413	0.083457	-0.33684	-0.54263	-0.68196	-0.85095	-1.0955	-1.0425	-0.97863	-0.76879	-0.64721	-0.52976	-0.55349	-0.47895	-0.27829	-0.25487	-0.21827	-0.057695	-0.010172	0.028772	0.19815	0.34185	0.47045	0.6645	0.68228	0.57251
S5	0.15872	0.2127	0.15368	0.046525	0.26959	0.085012	-0.18028	-0.07663	0.37834	0.31054	0.20953	0.24102	0.24047	0.26212	0.14296	0.23915	0.43627	0.35688	0.37584	0.35326	0.34158	0.27471	0.51512	0.62339	0.45925	0.11638	-0.12097	-0.38823	-0.55131	-0.63292	-0.55559	-0.3677	-0.40019	-0.6652	-0.67025	-0.48075	-0.56304	-0.57085	-0.67172	-0.52765	-0.24771	-0.27359	-0.29609	-0.29497	-0.17095	-0.19709	-0.29546	-0.1989	-0.096144
S6	0.068278	0.28426	0.22442	0.063513	0.09785	0.10698	-0.15313	-0.18885	-0.020934	-0.16504	-0.22581	-0.10708	-0.0014295	0.011044	-0.11634	-0.1278	-0.11629	-0.058308	-0.0089059	0.14034	0.20957	0.091854	0.1836	0.43106	0.28852	0.19825	0.13591	0.094155	0.20984	0.10905	0.1038	-0.11813	-0.15263	-0.034936	-0.18514	-0.31378	-0.30418	-0.259	-0.12076	-0.1538	-0.14648	-0.074709	0.14784	0.083949	-0.095073	-0.0095351	0.0055091	0.055282	0.15689
S7	0.011097	0.016286	0.14765	0.18122	0.22126	0.16536	0.20869	0.14546	0.23234	0.29186	0.024357	0.03068	0.243	0.089976	-0.0081092	0.081577	0.24109	0.092646	0.11478	0.29071	0.44762	0.26532	0.18454	0.10001	-0.44552	-0.81247	-0.70717	-0.62961	-0.64379	-0.48132	-0.3957	-0.31257	-0.3002	-0.086993	0.056254	0.15163	0.10507	-0.047209	0.036897	-0.042501	-0.090144	-0.034929	0.069526	0.1217	0.02209	-0.15723	-0.14238	-0.13741	-0.18259
S8	0.11818	0.072496	0.051991	0.080878	-0.035824	-0.089588	-0.084849	-0.097942	-0.11419	-0.18385	-0.061743	0.085137	0.094046	0.063814	0.053966	0.019188	0.082622	0.097971	0.19085	0.15894	0.10418	0.23814	0.52627	0.62096	0.44239	0.1068	-0.020797	0.28356	0.54796	0.53	0.17203	0.024128	0.086688	-0.012146	-0.20094	-0.10652	0.0088628	-0.015234	0.033272	0.13835	-0.016774	-0.25964	-0.26306	-0.36883	-0.41607	-0.21686	-0.25408	-0.34769	-0.3733
S9	-0.021464	0.19337	0.19876	0.15036	0.1813	0.22446	0.11042	0.17827	0.051062	0.084785	0.20184	0.2464	0.16398	0.089409	0.048105	0.32198	0.19714	0.019297	-0.070977	-0.17277	-0.1429	0.016914	-0.021772	-0.13754	-0.078114	0.020753	-0.15787	-0.4064	-0.4504	-0.52557	-0.50404	-0.43113	-0.27465	-0.27589	-0.12622	-0.22236	0.10974	0.097159	0.013854	0.18416	0.19164	-0.021148	-0.21686	-0.25433	-0.13081	-0.40523	-0.26247	-0.12885	-0.025401
S10	0.034609	-0.045752	0.014936	0.12601	-0.030951	-0.036032	0.088506	0.16789	0.22976	0.20555	0.32053	0.11516	-0.054257	-0.30511	-0.17599	-0.0493	0.040562	-0.042139	-0.12525	0.024646	0.30983	0.23077	0.40514	0.37759	0.067475	-0.12809	-0.43342	-0.27117	-0.30753	-0.38357	-0.35121	-0.28044	-0.50304	-0.4441	-0.37971	-0.35805	-0.19417	-0.18326	-0.0023865	0.10521	0.11973	-0.039537	0.068119	-0.056276	-0.014082	0.035081	0.0096076	-0.11188	0.15541
S11	0.00073335	-0.084224	-0.053174	-0.01332	0.17692	0.14696	0.32285	0.23295	0.075345	-0.03203	0.071404	0.14178	0.2475	0.1199	0.13941	0.053752	0.045491	0.10501	0.029872	0.26359	0.33384	0.29291	0.3554	0.34705	0.019044	-0.070753	-0.099848	-0.5252	-0.75158	-0.61038	-0.67452	-0.56676	-0.66643	-0.39642	-0.20198	-0.24176	-0.26819	-0.095688	-0.16155	0.010443	0.17201	0.031922	-0.07786	-0.12669	-0.13458	0.013533	-0.072838	0.1131	0.020511
S12	-0.013708	0.19309	0.26606	0.14365	0.062647	-0.14684	-0.33409	-0.4304	-0.16354	-0.040332	0.14144	0.42425	0.42509	0.32709	0.25718	0.30644	0.10332	-0.045674	0.0071643	0.41157	0.49031	0.67873	0.87403	1.1312	0.77213	0.31345	0.24234	0.12056	-0.029308	-0.39859	-0.82226	-0.79286	-0.91228	-0.76785	-0.64585	-0.73064	-0.65221	-0.31622	-0.075186	0.0040532	-0.2346	-0.3629	-0.60071	-0.8457	-0.67197	-0.47514	-0.13026	0.2397	0.26372
S13	-0.0080594	0.10548	0.17441	0.1075	0.030227	0.089572	0.03059	0.11194	0.14945	0.10546	-0.16712	-0.32838	-0.048893	-0.18934	0.0811	0.13284	0.053444	-0.25176	-0.1974	-0.032065	0.059124	0.054539	0.2223	0.30391	0.050483	-0.28855	-0.52178	-0.38724	-0.46593	-0.72637	-0.66026	-0.5748	-0.58021	-0.44957	-0.60644	-0.48314	-0.35264	-0.21326	-0.10939	0.072323	-0.029315	-0.24779	-0.3106	-0.34981	-0.10489	-0.018908	0.036398	-0.049455	0.17019
S14	-0.14402	-0.14363	-0.14531	-0.11395	0.0093956	0.060629	0.23677	0.18863	0.29925	0.34054	0.52351	0.36744	0.19055	0.10657	-0.057712	0.075257	-0.011025	-0.11619	0.12555	0.11443	0.20651	0.3336	0.4836	0.17467	-0.16544	-0.43389	-0.63368	-0.84514	-0.94431	-0.95859	-0.72333	-0.63318	-0.63941	-0.4998	-0.3275	-0.19777	-0.11792	-0.0094398	0.14512	0.14338	0.079792	0.063644	0.17511	0.25273	0.22313	0.24813	0.1454	0.1229	0.16354
S15	-0.18504	0.0085584	0.18292	-0.031282	0.35494	0.16459	0.061714	0.25462	0.0072118	-0.062182	0.30877	0.1821	0.005975	0.1369	0.077127	0.12068	0.19406	-0.033273	0.015403	0.081407	0.16365	-0.0052356	-0.066754	0.50905	0.17522	-0.21954	-0.22813	-0.60197	-0.78777	-0.66906	-0.78462	-0.42446	-0.49552	-0.44175	-0.39273	-0.53879	-0.20108	0.011421	-0.029055	-0.15035	0.027241	0.092088	0.2205	0.1114	0.17056	0.22993	0.19465	0.42765	0.51785
[truncated: 12 more columns]
