# Supplementary material for: A generalized cortical activity pattern at internally generated mental context boundaries during unguided narrative recall
Source: eLife. 2022 May 30;11:e73693. doi: 10.7554/eLife.73693 (PMC9177147; doi:10.7554/eLife.73693)
Supplement: Figure 3—figure supplement 2—source data 1. [file elife-73693-fig3-figsupp2-data1.xlsx]

## Sheet: Figure3_supplement2A
			Encoding																							Recall
			Offset										Middle										Offset										Middle
			Movie 1	Movie 2	Movie 3	Movie 4	Movie 5	Movie 6	Movie 7	Movie 8	Movie 9	Movie 10	Movie 1	Movie 2	Movie 3	Movie 4	Movie 5	Movie 6	Movie 7	Movie 8	Movie 9	Movie 10	Movie 1	Movie 2	Movie 3	Movie 4	Movie 5	Movie 6	Movie 7	Movie 8	Movie 9	Movie 10	Movie 1	Movie 2	Movie 3	Movie 4	Movie 5	Movie 6	Movie 7	Movie 8	Movie 9	Movie 10
Encoding	Offset	Movie 1	1	0.5349	0.6027	0.61029	0.31292	0.42731	0.58241	0.4136	0.53488	0.36946	-0.22341	-0.057451	-0.056048	-0.22687	-0.10109	-0.20764	-0.11757	-0.18314	0.031791	-0.089037	0.43277	0.35136	0.26082	0.38836	0.40001	0.10434	0.25528	0.21193	0.34345	0.4136	-0.026258	0.13769	0.095001	-0.16025	-0.086966	0.1202	-0.09685	0.0195	0.076059	0.06319
		Movie 2	0.5349	1	0.56391	0.65232	0.21524	0.48597	0.58476	0.58647	0.54259	0.41155	-0.21916	-0.08016	0.043156	-0.31652	-0.22653	-0.056228	-0.072425	-0.17511	0.10346	-0.0014832	0.32789	0.25258	0.2183	0.36194	0.36855	0.12928	0.20118	0.29082	0.29403	0.29878	-0.016507	0.12347	0.046777	-0.09637	-0.072771	0.18871	-0.080983	0.095632	0.054111	0.076002
		Movie 3	0.6027	0.56391	1	0.59132	0.25953	0.41147	0.49571	0.46901	0.56829	0.37497	-0.20477	-0.069456	0.0059241	-0.38698	-0.11706	-0.13569	-0.0019089	-0.14082	0.070836	-0.0056508	0.41352	0.32394	0.23055	0.41915	0.44293	0.098695	0.17129	0.18769	0.31245	0.34378	-0.073281	0.13109	0.11147	-0.10488	-0.065761	0.098843	-0.087648	0.067966	0.033876	0.065979
		Movie 4	0.61029	0.65232	0.59132	1	0.1622	0.45812	0.6076	0.52888	0.67264	0.29122	-0.34186	-0.060105	0.082531	-0.37068	-0.082824	-0.042151	-0.019505	-0.10551	0.028302	0.041924	0.39212	0.26643	0.17756	0.43684	0.39485	0.18273	0.17681	0.22568	0.3995	0.34907	-0.068213	0.14656	0.13857	-0.099398	-0.029438	0.095025	-0.12031	0.02396	-0.0013827	0.12579
		Movie 5	0.31292	0.21524	0.25953	0.1622	1	0.17313	0.31317	0.19997	0.20701	0.24272	0.026204	0.052624	-0.3098	-0.12619	-0.14165	-0.21326	-0.14491	0.076682	-0.017548	-0.33002	0.18332	0.15213	0.28915	0.20196	0.20831	0.020848	0.23387	0.00021058	0.10948	0.25259	-0.063996	0.078617	-0.061938	-0.036838	0.073187	0.11491	-0.017869	0.039885	0.010607	-0.016926
		Movie 6	0.42731	0.48597	0.41147	0.45812	0.17313	1	0.47016	0.43958	0.413	0.30389	-0.13846	-0.14045	0.02115	-0.1914	-0.03125	0.018347	-0.091632	-0.17486	-0.012811	0.048158	0.24069	0.25985	0.14575	0.30642	0.28643	0.080041	0.12442	0.18868	0.29233	0.28202	-0.066746	0.10477	0.06413	0.010769	-0.032618	0.052455	-0.020703	0.026975	0.034292	0.047586
		Movie 7	0.58241	0.58476	0.49571	0.6076	0.31317	0.47016	1	0.52221	0.6123	0.37713	-0.1742	-0.10835	-0.016234	-0.29429	-0.17403	-0.10863	-0.18643	-0.22222	0.059488	-0.095372	0.33954	0.30985	0.22281	0.46751	0.39913	0.095558	0.25043	0.25132	0.43366	0.37067	-0.081358	0.12171	0.10659	-0.045282	0.0014936	0.071079	-0.085916	-0.032778	0.091818	0.0028751
		Movie 8	0.4136	0.58647	0.46901	0.52888	0.19997	0.43958	0.52221	1	0.54009	0.31854	-0.21209	-0.082089	0.1662	-0.35062	-0.14301	0.077346	-0.04408	-0.16914	-0.042981	0.041584	0.31439	0.2938	0.19937	0.28259	0.37648	0.11432	0.11573	0.29549	0.24372	0.30142	-0.073049	0.14126	0.079742	-0.056764	-0.037476	0.12947	-0.025797	0.1089	-0.010513	0.056682
		Movie 9	0.53488	0.54259	0.56829	0.67264	0.20701	0.413	0.6123	0.54009	1	0.34859	-0.26105	-0.050754	0.10392	-0.35322	-0.0919	-0.056964	0.0045776	-0.090959	0.036186	0.054578	0.352	0.26533	0.19368	0.40717	0.34098	0.15969	0.12536	0.17499	0.39763	0.3799	-0.02719	0.15183	0.16889	-0.037086	-0.059481	0.066759	-0.10714	0.029294	-0.023955	0.12217
		Movie 10	0.36946	0.41155	0.37497	0.29122	0.24272	0.30389	0.37713	0.31854	0.34859	1	-0.11252	-0.055253	0.012191	-0.15246	-0.19464	0.02147	-0.17093	-0.081074	0.019253	-0.017987	0.12379	0.18484	0.15682	0.21628	0.16479	0.0039183	0.12896	0.055293	0.1708	0.28938	0.039026	0.029724	0.056115	-0.0058035	0.07031	0.028466	-0.067678	0.0532	-0.091985	-0.013482
	Middle	Movie 1	-0.22341	-0.21916	-0.20477	-0.34186	0.026204	-0.13846	-0.1742	-0.21209	-0.26105	-0.11252	1	-0.027261	-0.30472	0.055333	-0.22197	-0.090092	-0.1124	0.05428	-0.0026327	-0.21772	-0.062699	-0.074055	0.030777	-0.078261	-0.10581	-0.10575	0.075437	-0.18095	-0.05678	-0.18315	0.013535	0.036933	-0.12494	-0.092447	0.014995	0.0001531	-0.11792	0.096203	-0.040811	-0.19363
		Movie 2	-0.057451	-0.08016	-0.069456	-0.060105	0.052624	-0.14045	-0.10835	-0.082089	-0.050754	-0.055253	-0.027261	1	0.05435	0.10708	-0.092378	0.015083	-0.039937	0.1395	-0.050856	0.016175	0.022195	-0.081089	-0.015733	-0.14353	-0.038507	-0.13819	-0.1541	-0.086902	-0.050204	-0.088696	-0.060473	-0.0090095	0.018153	0.061641	0.026137	-0.037606	0.05952	0.055867	0.014631	-0.055374
		Movie 3	-0.056048	0.043156	0.0059241	0.082531	-0.3098	0.02115	-0.016234	0.1662	0.10392	0.012191	-0.30472	0.05435	1	-0.1327	0.1402	0.44494	0.13423	-0.20254	0.031587	0.61474	-0.046405	-0.014192	-0.28097	-0.0041179	-0.073474	0.038202	-0.30968	0.15567	0.03281	-0.031511	-0.014133	-0.0032691	0.2097	0.035742	-0.0081699	-0.15587	0.04827	-0.11615	-0.054744	0.248
		Movie 4	-0.22687	-0.31652	-0.38698	-0.37068	-0.12619	-0.1914	-0.29429	-0.35062	-0.35322	-0.15246	0.055333	0.10708	-0.1327	1	0.24818	0.046538	0.039711	0.094236	-0.045091	-0.0246	-0.18628	-0.21447	-0.15162	-0.35994	-0.2185	-0.021026	-0.1464	-0.17725	-0.33457	-0.17492	0.059527	-0.12515	-0.065679	0.082347	0.031676	-0.011309	0.097445	-0.038319	-0.058951	-0.04292
		Movie 5	-0.10109	-0.22653	-0.11706	-0.082824	-0.14165	-0.03125	-0.17403	-0.14301	-0.0919	-0.19464	-0.22197	-0.092378	0.1402	0.24818	1	0.19141	0.0089463	0.048694	-0.12973	0.18305	-0.12989	-0.069777	-0.12394	-0.15505	-0.19183	0.19258	-0.1016	-0.03971	-0.22373	0.0098207	-0.08224	-0.049446	0.094799	0.059566	0.10396	-0.074424	0.089064	-0.12285	-0.063321	0.10882
		Movie 6	-0.20764	-0.056228	-0.13569	-0.042151	-0.21326	0.018347	-0.10863	0.077346	-0.056964	0.02147	-0.090092	0.015083	0.44494	0.046538	0.19141	1	0.077647	-0.072825	-0.029035	0.42829	-0.14142	-0.1104	-0.19821	-0.065038	-0.14103	0.027658	-0.23506	-0.036707	-0.12714	-0.1109	-0.0347	-0.0045047	0.16878	-0.0099038	0.065862	-0.13179	0.10813	-0.053591	-0.090045	0.10161
		Movie 7	-0.11757	-0.072425	-0.0019089	-0.019505	-0.14491	-0.091632	-0.18643	-0.04408	0.0045776	-0.17093	-0.1124	-0.039937	0.13423	0.039711	0.0089463	0.077647	1	-0.027373	0.19773	0.13773	-0.018212	-0.060268	-0.15216	-0.097191	-0.01823	0.0017541	-0.075981	0.0006253	0.024114	-0.025494	0.069221	-0.090577	-0.022362	-0.1283	0.03026	0.090398	0.033735	-0.055913	-0.05483	0.16757
		Movie 8	-0.18314	-0.17511	-0.14082	-0.10551	0.076682	-0.17486	-0.22222	-0.16914	-0.090959	-0.081074	0.05428	0.1395	-0.20254	0.094236	0.048694	-0.072825	-0.027373	1	-0.04863	-0.14202	-0.082194	-0.071611	0.021009	-0.11424	-0.11573	-0.11254	0.0055755	-0.16209	-0.17085	-0.071726	-0.071821	-0.015367	-0.053363	0.062571	0.031736	-0.06615	0.014844	0.098737	0.007893	-0.04281
		Movie 9	0.031791	0.10346	0.070836	0.028302	-0.017548	-0.012811	0.059488	-0.042981	0.036186	0.019253	-0.0026327	-0.050856	0.031587	-0.045091	-0.12973	-0.029035	0.19773	-0.04863	1	0.013137	0.026108	0.023886	-0.032509	0.06167	0.13503	-0.047782	0.027325	0.11245	-0.036871	0.074943	-0.016299	0.038388	0.062347	-0.13025	0.039159	0.101	-0.044407	0.0099855	0.076225	-0.053426
		Movie 10	-0.089037	-0.0014832	-0.0056508	0.041924	-0.33002	0.048158	-0.095372	0.041584	0.054578	-0.017987	-0.21772	0.016175	0.61474	-0.0246	0.18305	0.42829	0.13773	-0.14202	0.013137	1	-0.12189	-0.0021205	-0.29913	-0.032157	-0.078436	0.024232	-0.26575	0.16571	0.025051	-0.04734	-0.00481	-0.05793	0.18827	0.02562	0.10557	-0.088195	0.12031	-0.11828	-0.0029191	0.22017
Recall	Offset	Movie 1	0.43277	0.32789	0.41352	0.39212	0.18332	0.24069	0.33954	0.31439	0.352	0.12379	-0.062699	0.022195	-0.046405	-0.18628	-0.12989	-0.14142	-0.018212	-0.082194	0.026108	-0.12189	1	0.31137	0.33539	0.32823	0.3966	0.059273	0.25853	0.22051	0.28772	0.36438	-0.18197	0.09748	0.018654	-0.063758	-0.15047	0.067804	-0.080494	0.070602	0.031396	0.054605
		Movie 2	0.35136	0.25258	0.32394	0.26643	0.15213	0.25985	0.30985	0.2938	0.26533	0.18484	-0.074055	-0.081089	-0.014192	-0.21447	-0.069777	-0.1104	-0.060268	-0.071611	0.023886	-0.0021205	0.31137	1	0.30185	0.33816	0.31624	0.17103	0.26842	0.29709	0.24165	0.32474	-0.050408	-0.14778	0.062959	-0.16086	0.022315	0.059945	-0.017983	-0.087538	0.027707	0.0684
		Movie 3	0.26082	0.2183	0.23055	0.17756	0.28915	0.14575	0.22281	0.19937	0.19368	0.15682	0.030777	-0.015733	-0.28097	-0.15162	-0.12394	-0.19821	-0.15216	0.021009	-0.032509	-0.29913	0.33539	0.30185	1	0.28425	0.26168	0.071184	0.39218	0.32189	0.23114	0.346	-0.016885	0.058502	-0.13096	-0.21051	-0.14546	0.13447	-0.057415	-0.019157	0.047037	-0.068708
		Movie 4	0.38836	0.36194	0.41915	0.43684	0.20196	0.30642	0.46751	0.28259	0.40717	0.21628	-0.078261	-0.14353	-0.0041179	-0.35994	-0.15505	-0.065038	-0.097191	-0.11424	0.06167	-0.032157	0.32823	0.33816	0.28425	1	0.43638	0.24152	0.31547	0.13876	0.3437	0.41618	-0.11437	0.13063	0.086133	-0.13221	-0.1106	-0.060753	-0.26535	-0.0095291	-0.10065	0.042633
		Movie 5	0.40001	0.36855	0.44293	0.39485	0.20831	0.28643	0.39913	0.37648	0.34098	0.16479	-0.10581	-0.038507	-0.073474	-0.2185	-0.19183	-0.14103	-0.01823	-0.11573	0.13503	-0.078436	0.3966	0.31624	0.26168	0.43638	1	0.12447	0.26745	0.32632	0.29479	0.33368	-0.098442	0.11043	0.040692	-0.13548	-0.091385	0.1641	-0.1399	0.071672	0.049042	0.00035841
		Movie 6	0.10434	0.12928	0.098695	0.18273	0.020848	0.080041	0.095558	0.11432	0.15969	0.0039183	-0.10575	-0.13819	0.038202	-0.021026	0.19258	0.027658	0.0017541	-0.11254	-0.047782	0.024232	0.059273	0.17103	0.071184	0.24152	0.12447	1	0.1595	0.051343	0.13775	0.23919	-0.026106	-0.038133	0.020383	-0.02799	-0.013623	-0.023362	-0.11312	-0.090188	-0.22345	0.11564
		Movie 7	0.25528	0.20118	0.17129	0.17681	0.23387	0.12442	0.25043	0.11573	0.12536	0.12896	0.075437	-0.1541	-0.30968	-0.1464	-0.1016	-0.23506	-0.075981	0.0055755	0.027325	-0.26575	0.25853	0.26842	0.39218	0.31547	0.26745	0.1595	1	0.19436	0.22232	0.35208	-0.063256	0.11964	-0.039688	-0.159	-0.0073315	0.15259	-0.31735	-0.14853	-0.11619	-0.00074632
		Movie 8	0.21193	0.29082	0.18769	0.22568	0.00021058	0.18868	0.25132	0.29549	0.17499	0.055293	-0.18095	-0.086902	0.15567	-0.17725	-0.03971	-0.036707	0.0006253	-0.16209	0.11245	0.16571	0.22051	0.29709	0.32189	0.13876	0.32632	0.051343	0.19436	1	0.19949	0.24586	-0.091089	-0.041846	-0.023115	-0.22368	-0.14689	0.090921	0.01612	-0.10865	0.040062	-0.028847
		Movie 9	0.34345	0.29403	0.31245	0.3995	0.10948	0.29233	0.43366	0.24372	0.39763	0.1708	-0.05678	-0.050204	0.03281	-0.33457	-0.22373	-0.12714	0.024114	-0.17085	-0.036871	0.025051	0.28772	0.24165	0.23114	0.3437	0.29479	0.13775	0.22232	0.19949	1	0.34962	-0.16442	0.093133	0.057795	-0.15715	-0.17303	0.063699	-0.079497	-0.19885	-0.13667	0.0049485
		Movie 10	0.4136	0.29878	0.34378	0.34907	0.25259	0.28202	0.37067	0.30142	0.3799	0.28938	-0.18315	-0.088696	-0.031511	-0.17492	0.0098207	-0.1109	-0.025494	-0.071726	0.074943	-0.04734	0.36438	0.32474	0.346	0.41618	0.33368	0.23919	0.35208	0.24586	0.34962	1	-0.17009	0.003304	-0.0056689	-0.003927	0.034197	0.073468	-0.22598	0.019665	-0.060889	0.047457
	Middle	Movie 1	-0.026258	-0.016507	-0.073281	-0.068213	-0.063996	-0.066746	-0.081358	-0.073049	-0.02719	0.039026	0.013535	-0.060473	-0.014133	0.059527	-0.08224	-0.0347	0.069221	-0.071821	-0.016299	-0.00481	-0.18197	-0.050408	-0.016885	-0.11437	-0.098442	-0.026106	-0.063256	-0.091089	-0.16442	-0.17009	1	-0.063959	-0.0184	-0.095657	0.0014178	-0.013272	0.020658	-0.012504	0.062996	0.004769
		Movie 2	0.13769	0.12347	0.13109	0.14656	0.078617	0.10477	0.12171	0.14126	0.15183	0.029724	0.036933	-0.0090095	-0.0032691	-0.12515	-0.049446	-0.0045047	-0.090577	-0.015367	0.038388	-0.05793	0.09748	-0.14778	0.058502	0.13063	0.11043	-0.038133	0.11964	-0.041846	0.093133	0.003304	-0.063959	1	0.085631	-0.058749	-0.019076	0.079216	-0.09948	0.06537	-0.045089	0.0064252
		Movie 3	0.095001	0.046777	0.11147	0.13857	-0.061938	0.06413	0.10659	0.079742	0.16889	0.056115	-0.12494	0.018153	0.2097	-0.065679	0.094799	0.16878	-0.022362	-0.053363	0.062347	0.18827	0.018654	0.062959	-0.13096	0.086133	0.040692	0.020383	-0.039688	-0.023115	0.057795	-0.0056689	-0.0184	0.085631	1	0.049316	-0.058885	-0.023539	0.018256	0.035725	0.031842	0.069667
		Movie 4	-0.16025	-0.09637	-0.10488	-0.099398	-0.036838	0.010769	-0.045282	-0.056764	-0.037086	-0.0058035	-0.092447	0.061641	0.035742	0.082347	0.059566	-0.0099038	-0.1283	0.062571	-0.13025	0.02562	-0.063758	-0.16086	-0.21051	-0.13221	-0.13548	-0.02799	-0.159	-0.22368	-0.15715	-0.003927	-0.095657	-0.058749	0.049316	1	-0.038723	-0.13221	-0.076186	0.20271	0.053566	-0.025212
		Movie 5	-0.086966	-0.072771	-0.065761	-0.029438	0.073187	-0.032618	0.0014936	-0.037476	-0.059481	0.07031	0.014995	0.026137	-0.0081699	0.031676	0.10396	0.065862	0.03026	0.031736	0.039159	0.10557	-0.15047	0.022315	-0.14546	-0.1106	-0.091385	-0.013623	-0.0073315	-0.14689	-0.17303	0.034197	0.0014178	-0.019076	-0.058885	-0.038723	1	-0.019273	0.14414	0.013018	0.03493	0.070479
		Movie 6	0.1202	0.18871	0.098843	0.095025	0.11491	0.052455	0.071079	0.12947	0.066759	0.028466	0.0001531	-0.037606	-0.15587	-0.011309	-0.074424	-0.13179	0.090398	-0.06615	0.101	-0.088195	0.067804	0.059945	0.13447	-0.060753	0.1641	-0.023362	0.15259	0.090921	0.063699	0.073468	-0.013272	0.079216	-0.023539	-0.13221	-0.019273	1	0.023312	0.011368	0.048161	-0.048545
		Movie 7	-0.09685	-0.080983	-0.087648	-0.12031	-0.017869	-0.020703	-0.085916	-0.025797	-0.10714	-0.067678	-0.11792	0.05952	0.04827	0.097445	0.089064	0.10813	0.033735	0.014844	-0.044407	0.12031	-0.080494	-0.017983	-0.057415	-0.26535	-0.1399	-0.11312	-0.31735	0.01612	-0.079497	-0.22598	0.020658	-0.09948	0.018256	-0.076186	0.14414	0.023312	1	-0.12276	0.10984	-0.045649
		Movie 8	0.0195	0.095632	0.067966	0.02396	0.039885	0.026975	-0.032778	0.1089	0.029294	0.0532	0.096203	0.055867	-0.11615	-0.038319	-0.12285	-0.053591	-0.055913	0.098737	0.0099855	-0.11828	0.070602	-0.087538	-0.019157	-0.0095291	0.071672	-0.090188	-0.14853	-0.10865	-0.19885	0.019665	-0.012504	0.06537	0.035725	0.20271	0.013018	0.011368	-0.12276	1	0.12271	-0.068253
		Movie 9	0.076059	0.054111	0.033876	-0.0013827	0.010607	0.034292	0.091818	-0.010513	-0.023955	-0.091985	-0.040811	0.014631	-0.054744	-0.058951	-0.063321	-0.090045	-0.05483	0.007893	0.076225	-0.0029191	0.031396	0.027707	0.047037	-0.10065	0.049042	-0.22345	-0.11619	0.040062	-0.13667	-0.060889	0.062996	-0.045089	0.031842	0.053566	0.03493	0.048161	0.10984	0.12271	1	0.00729
		Movie 10	0.06319	0.076002	0.065979	0.12579	-0.016926	0.047586	0.0028751	0.056682	0.12217	-0.013482	-0.19363	-0.055374	0.248	-0.04292	0.10882	0.10161	0.16757	-0.04281	-0.053426	0.22017	0.054605	0.0684	-0.068708	0.042633	0.00035841	0.11564	-0.00074632	-0.028847	0.0049485	0.047457	0.004769	0.0064252	0.069667	-0.025212	0.070479	-0.048545	-0.045649	-0.068253	0.00729	1

## Sheet: Figure3_supplement2C
	Recall-Recall		Encoding-Recall
	Offset	Middle	Offset	Middle
S1	0.053758	0.0046497	0.049383	0.022462
S2	0.41255	0.0010123	0.40883	0.028963
S3	0.27081	0.05882	0.23144	-0.030089
S4	0.25547	-0.0065814	0.20504	-0.044391
S5	0.33924	-0.058271	0.35432	-0.037083
S6	0.3007	0.027369	0.34252	-0.022068
S7	0.2783	0.01227	0.34201	-0.0073087
S8	0.34294	0.013129	0.26228	-0.010825
S9	0.13658	0.033013	0.21986	0.085294
S10	0.53962	0.023974	0.33136	0.00022993
S11	0.18835	0.0024926	0.16401	-0.012826
S12	0.32076	-0.047945	0.18341	0.052073
S13	0.37386	-0.012087	0.29486	0.024987
S14	0.15883	-0.011682	0.23659	-0.01788
S15	0.17218	-0.019489	0.2281	-0.021706

## Sheet: Figure3_supplement2D_Onset
0.068113	0.073176	0.16046	0.1646	0.11191	0.14607	0.096252	0.087387	0.077472	0.066508	0.055237	0.080369	0.086129	0.11106	0.079022	-0.011163	-0.0076229	0.013008	-0.049753	-0.099551	-0.17258	-0.23377	-0.20298	-0.20086	-0.23653	-0.20828	-0.16729	-0.15664	-0.15821	-0.13668	-0.030349	-0.040349	-0.0273	-0.045213	-0.0016752	0.061077	0.040396	0.060725	0.011574	0.014652	-0.017333	-0.042707	-0.020404	0.038843	0.043	-0.017209	0.051774	0.059116	0.091556	0.11592
0.080231	0.11085	0.1532	0.16411	0.11733	0.11259	0.11073	0.063493	0.055164	0.11813	0.10473	0.12382	0.14021	0.14904	0.13595	0.055644	0.02785	0.080628	0.0045866	-0.069059	-0.13287	-0.18116	-0.14289	-0.15419	-0.16776	-0.21195	-0.19186	-0.19583	-0.2204	-0.1642	-0.044573	-0.035997	-0.03475	-0.094941	-0.035569	0.050555	0.058825	0.055615	0.021302	0.00074443	-0.078562	-0.10957	-0.09202	-0.027632	-0.0081641	-0.0022423	0.043556	0.046643	0.025735	0.09937
0.11266	0.09775	0.13671	0.14232	0.086459	0.08034	0.072848	0.067195	0.11809	0.1085	0.082429	0.11157	0.10959	0.13404	0.12617	0.020697	0.040607	0.065897	-0.008987	-0.080034	-0.15769	-0.2173	-0.17634	-0.19241	-0.20584	-0.22761	-0.19164	-0.1849	-0.18697	-0.12208	0.018132	0.0058589	-0.00075678	-0.038114	0.0035618	0.054864	0.028528	0.053669	0.025177	0.028694	-0.048243	-0.07724	-0.088667	-0.033424	-0.035501	-0.011284	0.066936	0.056395	0.077055	0.05287
0.071076	0.060269	0.094881	0.1129	0.095027	0.06957	0.084706	0.08983	0.14936	0.091192	0.088897	0.10709	0.086755	0.079009	0.085699	0.0023429	-0.014145	0.0073375	-0.080061	-0.092159	-0.21427	-0.29206	-0.24317	-0.24671	-0.24413	-0.25104	-0.20121	-0.15722	-0.14372	-0.073192	0.009261	0.035195	0.064164	0.06652	0.1021	0.11635	0.097407	0.11673	0.050288	0.081687	0.040563	-0.032038	0.023512	-0.00052006	0.035393	0.0090795	0.047109	0.030032	0.08132	0.079907
0.0077999	0.068508	0.11214	0.12043	0.055528	0.090106	0.06656	0.077382	0.11384	0.050114	0.054434	0.077886	0.081919	0.037368	0.035334	-0.11098	-0.094921	-0.09208	-0.15554	-0.1701	-0.26174	-0.35808	-0.30523	-0.31326	-0.29837	-0.26685	-0.19008	-0.12007	-0.070409	-0.055625	0.040801	0.065946	0.12453	0.12588	0.15066	0.15457	0.12934	0.14027	0.10649	0.1035	0.11403	0.040638	0.037349	0.042838	0.059803	0.03604	0.058859	0.020477	0.11985	0.12844
-0.0079307	0.11011	0.14292	0.093906	0.034203	0.098826	0.0553	0.048368	0.084475	0.044239	0.050445	0.065743	0.042117	-0.019163	-0.027646	-0.12367	-0.16048	-0.19973	-0.23743	-0.21344	-0.29282	-0.35882	-0.31426	-0.30781	-0.29504	-0.23997	-0.14299	-0.12941	-0.040044	0.01059	0.040494	0.044426	0.12304	0.17113	0.18726	0.17052	0.23777	0.14702	0.10692	0.074247	0.118	0.044656	0.099424	0.114	0.11165	0.067131	0.050824	0.070409	0.12395	0.1296
-0.051193	0.082633	0.1046	0.08015	-0.014516	0.057309	0.038669	0.05126	0.083523	0.024068	0.06554	0.067777	0.062565	0.024065	-0.027936	-0.16928	-0.18442	-0.18229	-0.18714	-0.18143	-0.24421	-0.27112	-0.25826	-0.2279	-0.22823	-0.16955	-0.071731	-0.052839	0.018906	0.04868	0.10943	0.052444	0.14938	0.15474	0.14765	0.16533	0.24636	0.086607	0.080844	0.030156	0.079236	0.087712	0.13542	0.16329	0.14554	0.094082	0.056809	0.044755	0.14357	0.2081
-0.03302	0.070545	0.071239	0.021802	-0.061018	-0.0096192	0.024341	0.030151	0.022479	-0.041441	0.056079	0.021404	-0.0019076	-0.0089103	-0.034387	-0.088067	-0.12349	-0.14514	-0.15656	-0.073419	-0.1534	-0.18097	-0.17762	-0.13502	-0.13483	-0.10661	-0.017531	0.028907	0.07753	0.085356	0.12167	0.094265	0.13419	0.11359	0.11921	0.07609	0.14412	0.028975	0.04537	0.037828	0.065357	0.092076	0.15645	0.14667	0.12169	0.092213	0.053321	0.084378	0.14097	0.16733
-0.056962	0.021482	0.025444	0.00036248	-0.068437	-0.038127	-0.050513	-0.011721	-0.01107	-0.090288	0.034502	0.029807	-0.01419	-0.0050081	0.015365	-0.024179	-0.11614	-0.072551	-0.079447	-0.031928	-0.078438	-0.087283	-0.11405	-0.081881	-0.078465	-0.047368	0.014788	0.050787	0.076362	0.10074	0.083386	0.11319	0.13027	0.053194	0.11335	0.047521	0.14087	-0.0070144	0.02788	0.080702	0.088868	0.053264	0.15338	0.15574	0.083137	0.086409	0.042185	0.066584	0.10983	0.10787
-0.049763	0.019418	-0.023578	0.0019682	-0.034658	-0.067392	-0.071725	-0.0024466	0.043933	-0.044981	-0.030252	-0.014581	-0.042553	0.030887	0.05489	-0.014709	-0.029964	-0.017878	-0.058193	0.047472	-0.0055967	-0.056363	-0.084455	-0.069125	-0.074397	-0.064052	-0.016676	-0.0040703	0.039679	0.037239	0.055708	0.078873	0.12434	0.068798	0.094533	0.043704	0.067992	0.015709	0.054707	0.064606	0.11237	0.053997	0.13711	0.14113	0.13346	0.052582	0.017203	0.062473	0.078824	0.068974
-0.01455	-0.0058825	-0.036139	-0.0067889	-0.058754	-0.092111	-0.037465	0.051928	0.093496	0.034279	0.049125	0.070226	0.042813	0.073094	0.043083	-0.018386	-0.050309	-0.021435	-0.063457	-0.051572	-0.048966	-0.10203	-0.13932	-0.14916	-0.15925	-0.068764	-0.0030093	-0.0082817	0.03252	0.028991	0.051775	0.09662	0.11417	0.1265	0.090507	0.030211	0.054723	0.035872	0.073835	0.066574	0.070964	0.015426	0.13888	0.1385	0.12235	0.059312	-0.0073792	0.023422	0.020956	0.033924
-0.048364	-0.0053	-0.032836	-0.01739	-0.06426	-0.080062	-0.028026	0.060842	0.13433	0.024074	0.039399	0.12205	0.05786	0.08806	0.074144	0.012932	-0.022113	0.01442	-0.064369	-0.036122	-0.0031264	-0.063679	-0.12003	-0.12358	-0.11902	-0.033555	0.012451	-0.0023301	-0.0092323	0.010065	0.043582	0.094432	0.11058	0.053968	0.042408	0.016456	0.00058424	-0.015049	-0.0096242	-0.016652	0.027201	0.012514	0.11976	0.11844	0.091533	0.063437	0.00083938	-0.023649	-0.00052121	0.055468
-0.033456	-0.041111	-0.028707	-0.075152	-0.13733	-0.13754	-0.066071	-0.026392	0.084983	0.057007	0.054231	0.070523	0.032448	0.047878	0.0096046	-0.02625	-0.059987	-0.052003	-0.053366	-0.062413	-0.028303	-0.080279	-0.11746	-0.10074	-0.10876	-0.029507	0.0039481	-0.0031875	-0.011145	0.051856	0.087768	0.11564	0.11148	0.059266	-0.023737	-0.005494	0.010104	0.069493	-0.02293	-0.035658	0.024258	0.065301	0.13511	0.085452	0.079366	0.039824	0.052975	0.04511	0.0062606	0.029255
-0.063686	-0.0081575	-0.0029309	-0.094476	-0.12578	-0.1074	-0.11079	-0.049016	0.057115	-0.0059108	-0.010463	-0.01359	-0.059868	-0.053041	-0.072742	-0.10002	-0.066792	-0.10334	-0.13572	-0.091707	-0.065723	-0.059017	-0.095664	-0.027955	0.0067868	0.0025866	0.0386	-0.021148	-0.03374	0.044697	0.059309	0.082412	0.12167	0.095188	0.01242	0.011157	-0.030543	0.0076776	-0.00060966	-0.030671	-0.010364	0.096041	0.084062	0.037179	0.081301	0.032002	0.048936	0.025495	-0.018062	-0.0074628
-0.075662	-0.0098429	0.048565	-0.10419	-0.13389	-0.11071	-0.14258	-0.073929	0.0059313	-0.024299	-0.045602	-0.1203	-0.12955	-0.072488	-0.084419	-0.095458	-0.07863	-0.09231	-0.11155	-0.091542	-0.066076	-0.054003	-0.063527	-0.010378	0.012397	0.01338	0.052961	0.0081515	0.028817	0.092983	0.083874	0.055244	0.075288	0.10333	0.033751	0.035287	0.029254	0.035077	0.04858	-0.0069406	-0.015135	0.074024	0.04525	0.012094	0.067486	0.019564	0.063453	0.052837	0.018269	-0.021456
-0.048942	-0.030455	0.026397	-0.089473	-0.12256	-0.10503	-0.061486	-0.044208	-0.005393	-0.019447	-0.032657	-0.10339	-0.11702	-0.080252	-0.066276	-0.10325	-0.065194	-0.097999	-0.12178	-0.04181	-0.029546	0.0068665	-0.040766	-0.02545	0.043951	0.077242	0.11223	0.054537	0.043139	0.092006	0.11129	0.060852	0.10398	0.13978	0.088502	0.087145	0.071138	0.071248	0.10765	0.015073	-0.04789	0.0675	0.094316	-0.016218	0.017257	-0.00097204	0.045728	0.080511	0.0071219	-0.0013116
-0.012523	0.016972	0.062523	-0.031343	-0.060653	-0.052329	-0.040173	-0.026933	-0.017723	-0.024607	-0.034555	-0.045831	-0.028243	-0.025725	-0.034745	-0.076436	-0.023506	-0.027187	-0.063808	-0.027207	-0.025509	0.022725	0.019067	0.0021029	0.049187	0.076116	0.10869	0.020127	0.030408	0.11291	0.11375	0.032806	0.048156	0.062854	0.079555	0.073702	0.054111	0.032191	0.09166	-0.022975	-0.064116	0.016673	0.019724	-0.025014	-0.024357	-0.017497	0.026364	0.054233	0.039588	-0.017156
0.013138	0.010138	0.052864	0.037994	-0.023209	-0.070156	-0.0073169	0.00065663	0.01882	0.0062802	-0.026712	-0.025813	0.020098	0.061696	0.0020529	-0.063335	0.039971	0.018051	0.024261	0.046103	-0.003579	0.035088	0.039294	0.01002	0.041824	0.077567	0.082337	0.013854	-0.011111	0.063446	0.034268	0.03812	0.021341	0.063572	0.021867	0.049583	0.0077206	-0.0016778	0.070915	-0.0084061	-0.090089	-0.0061038	-0.057651	-0.073453	-0.11633	-0.097434	-0.021413	0.039062	0.014142	0.0092038
-0.035007	-0.021298	0.053516	0.053529	0.0014686	-0.077641	-0.020641	0.0028388	-0.034623	-0.039816	-0.034244	-0.0036564	0.02962	0.062452	-0.0011128	-0.038547	0.05455	0.012211	0.03772	-0.001864	-0.038762	-0.0099672	0.009885	-0.0018097	0.026633	0.066368	0.05808	0.043057	0.040708	0.094547	0.02615	0.026964	0.019599	0.054603	0.021647	0.015302	-0.019109	-0.04464	0.02439	0.0078557	-0.063138	0.0035446	-0.13478	-0.10839	-0.11602	-0.079339	-0.02764	-0.040204	0.0077972	-0.011247
-0.038225	-0.079056	0.0094951	-0.015977	-0.087272	-0.084536	-0.022108	-0.03779	-0.063502	-0.027198	-0.030588	-0.031203	0.010787	0.068356	-0.0068339	-0.020329	0.036727	0.055016	0.059898	-0.01549	-0.051435	-0.018625	-0.01725	-0.024287	0.0081779	0.075798	0.095874	0.06431	0.049062	0.077591	0.036326	0.028321	0.033372	0.031613	0.043445	0.024389	0.0079067	-0.015578	0.023878	0.023982	-0.077079	-0.032231	-0.15003	-0.10002	-0.13686	-0.068545	-0.01758	-0.0060538	0.052326	0.018756
-0.050923	-0.084921	-0.048842	-0.044258	-0.1208	-0.091698	-0.065065	-0.049631	-0.10556	-0.073004	-0.05178	-0.058784	-0.054466	-0.015586	-0.052928	-0.039443	-0.013748	0.059645	0.0556	-0.029008	-0.046637	0.021559	0.022879	0.015232	0.063964	0.13691	0.12416	0.1031	0.10447	0.065248	0.064488	0.0091686	0.032638	0.049877	0.079822	0.047158	0.02461	-0.0553	-0.0069889	0.023792	-0.057399	0.039202	-0.069038	-0.075545	-0.069947	-0.014362	0.01432	-0.014761	0.047652	0.069831
-0.12112	-0.10482	-0.07564	-0.1081	-0.15677	-0.11566	-0.097258	-0.11366	-0.13344	-0.12445	-0.097851	-0.10805	-0.053199	-0.029164	-0.034482	0.0033839	0.011658	0.059288	0.07269	3.1675e-06	-0.0054403	0.058181	0.062253	0.067017	0.11182	0.16863	0.21662	0.17572	0.17926	0.11797	0.088858	0.043678	0.059437	0.081345	0.12928	0.081815	0.097792	-0.0096929	0.035949	0.016126	-0.02279	0.059045	-0.020418	-0.049467	-0.075941	-0.023542	-0.02995	0.0087816	0.057398	0.044004
-0.080539	-0.11935	-0.10574	-0.11029	-0.12281	-0.094941	-0.12247	-0.1363	-0.12982	-0.10635	-0.11652	-0.087248	-0.026116	-0.0076018	-0.036363	-0.013771	-0.013897	0.0087989	0.068957	0.063999	0.055601	0.10932	0.09411	0.094455	0.1772	0.2398	0.27972	0.23894	0.2371	0.20561	0.16225	0.1434	0.12912	0.14117	0.16289	0.080622	0.12105	0.030113	0.070412	0.085482	0.091932	0.093814	0.04096	-0.02269	-0.060071	-0.09582	-0.077309	-0.010391	0.032075	-0.01806
-0.017833	-0.017373	-0.03866	-0.079211	-0.068732	-0.054893	-0.090988	-0.089455	-0.0725	-0.099523	-0.095181	-0.063276	-0.030375	0.0064391	-0.010064	0.0068862	0.0081711	-0.003004	0.028865	-0.0062678	-0.0029886	0.040962	0.00071987	0.026705	0.11615	0.206	0.29242	0.19344	0.21004	0.22817	0.18443	0.21203	0.15552	0.19552	0.20798	0.10449	0.12368	0.053565	0.054133	0.10223	0.055487	0.018503	-0.013427	-0.092174	-0.075484	-0.093681	-0.041615	0.026269	-0.00086626	-0.011356
0.030559	0.057192	0.014007	-0.048345	-0.053101	-0.057744	-0.07928	-0.048243	-0.025303	-0.066356	-0.10264	-0.087117	-0.11108	-0.057133	-0.041962	-0.059592	-0.0097353	-0.061665	-0.051289	-0.022234	-0.021734	-0.020288	-0.021765	-0.028626	0.08223	0.16515	0.19994	0.12352	0.14106	0.16484	0.14888	0.20319	0.16465	0.20736	0.18298	0.10659	0.083204	0.029272	0.089999	0.090274	0.057754	0.021407	-0.013719	0.0026109	-0.0033999	-0.043836	0.0041126	0.066535	0.066019	0.044147
-0.014837	0.023157	0.001424	-0.094939	-0.086549	-0.091014	-0.074969	-0.070534	-0.052761	-0.11105	-0.094684	-0.13046	-0.15772	-0.12434	-0.054681	-0.035599	-0.013323	-0.057288	-0.077355	-0.008005	-0.014445	-0.026665	-0.037159	-0.0096214	0.093155	0.11031	0.16339	0.096529	0.11732	0.15156	0.084999	0.15313	0.15754	0.21755	0.19146	0.12992	0.057043	0.03778	0.083477	0.091727	0.066952	0.074395	0.022705	0.046617	0.044573	0.012349	0.042663	0.095762	0.074463	0.047127
-0.033804	-0.023539	-0.021695	-0.07735	-0.087769	-0.10837	-0.092682	-0.047715	-0.073671	-0.131	-0.09558	-0.094977	-0.10849	-0.065611	-0.028258	-0.030391	-0.004295	-0.018294	-0.007943	0.053147	0.056518	0.039361	0.039725	0.048916	0.12691	0.13148	0.20793	0.17202	0.17344	0.14795	0.079654	0.16374	0.15498	0.20822	0.19898	0.12332	0.048349	0.01384	0.090792	0.057531	0.044718	0.051405	0.0072414	0.073116	0.068236	0.051203	0.035658	0.078467	0.07835	0.029034
-0.047396	-0.035602	-0.039408	-0.10425	-0.089856	-0.10235	-0.086063	-0.040989	-0.070773	-0.14855	-0.098574	-0.10852	-0.080652	-0.050628	-0.047122	-0.014026	0.0019692	0.0067978	-0.00042741	0.071467	0.096484	0.099613	0.087857	0.063337	0.16922	0.20156	0.20145	0.15716	0.14967	0.15009	0.07624	0.17136	0.14166	0.16403	0.13853	0.045642	0.052774	0.0065203	0.079712	0.036161	0.010746	0.06332	0.01168	0.083837	0.071505	0.048976	0.025886	0.057094	0.043406	-0.026541
-0.022078	-0.0078831	-0.027973	-0.03696	-0.032942	-0.06183	-0.064629	-0.024075	-0.036429	-0.07806	-0.035565	-0.033219	0.0017247	0.0096099	-0.029526	-0.054239	-0.023378	-0.0059216	0.010381	0.001286	0.048395	0.099625	0.094794	0.064927	0.20386	0.22594	0.25291	0.17188	0.16545	0.19029	0.15765	0.23928	0.19936	0.19504	0.12329	0.016914	0.050573	-0.015891	0.021823	-0.01822	-0.0090543	0.0042613	-0.060902	-0.044938	-0.0088181	-0.025725	-0.037403	0.016515	-0.0068166	-0.062156
-0.038738	-0.01295	-0.037034	-0.035447	-0.054987	-0.070074	-0.10457	-0.077555	-0.066711	-0.084265	-0.07332	-0.05536	-0.0024193	-0.0050783	-0.034684	-0.059988	-0.019928	-0.015147	0.030562	0.025597	0.10093	0.15656	0.13717	0.09687	0.23209	0.26812	0.26903	0.17229	0.19032	0.19354	0.18467	0.25698	0.20033	0.16884	0.10542	0.025096	0.027524	-0.017463	0.0050094	-0.026284	-0.0024694	-0.0036897	-0.10469	-0.09308	-0.094578	-0.068425	-0.10542	-0.042225	-0.0070581	-0.064907
0.039542	-0.036516	-0.049513	-0.013385	-0.053151	-0.088015	-0.10243	-0.04648	-0.055317	-0.038638	-0.030593	-0.045109	0.022865	0.039207	0.019189	-0.045608	0.010466	0.026891	0.067384	0.044329	0.090055	0.16792	0.19251	0.15713	0.26129	0.30142	0.28145	0.14882	0.15257	0.16211	0.15733	0.19465	0.10235	0.09252	0.05839	-0.012581	-0.04705	-0.046348	-0.031514	-0.020094	-0.023877	0.0035211	-0.096247	-0.12568	-0.10273	-0.049684	-0.079582	-0.081175	-0.032912	-0.038118
-0.025838	-0.084711	-0.10017	-0.052891	-0.10225	-0.13432	-0.13031	-0.053847	-0.026681	-0.053992	-0.022736	-0.040687	-0.027522	0.0079395	-0.006519	-0.0083712	0.016405	0.072134	0.10541	0.10704	0.16367	0.24308	0.26228	0.27437	0.30879	0.33336	0.26565	0.17476	0.13938	0.10368	0.050641	0.063453	0.004154	-0.025967	-0.016448	-0.093294	-0.12908	-0.17213	-0.11173	0.0083096	-0.017185	0.0093043	-0.057172	-0.040078	-0.045765	0.023886	-0.034028	-0.089609	-0.051291	-0.062732
-0.026219	-0.11171	-0.11447	-0.11987	-0.12779	-0.17433	-0.14991	-0.074185	-0.058924	-0.058625	-0.026314	-0.075678	-0.04432	-0.013449	-0.036029	-0.02019	0.049207	0.10761	0.14758	0.16324	0.23203	0.31582	0.32003	0.31288	0.33325	0.32703	0.23822	0.13944	0.072721	0.05906	-0.04657	-0.010206	-0.090319	-0.1009	-0.10226	-0.16398	-0.17104	-0.17659	-0.090381	-0.05068	-0.061218	-0.0077967	-0.049041	-0.020629	-0.031789	0.03775	-0.012947	-0.07444	-0.10088	-0.094306
-0.060184	-0.15002	-0.13147	-0.13486	-0.11567	-0.19779	-0.1782	-0.12137	-0.11365	-0.089616	-0.045383	-0.090946	-0.079661	-0.037282	-0.060589	-0.030212	0.034976	0.11013	0.14532	0.19014	0.27548	0.37328	0.37802	0.37354	0.3939	0.34161	0.25381	0.189	0.085553	0.067434	-0.022372	0.019528	-0.077587	-0.11392	-0.14814	-0.16424	-0.19592	-0.20719	-0.11781	-0.044092	-0.096402	-0.067664	-0.10761	-0.068135	-0.034973	0.0016621	-0.036645	-0.080507	-0.13789	-0.090158
-0.077218	-0.14577	-0.10335	-0.083956	-0.07865	-0.13156	-0.13861	-0.092231	-0.11758	-0.067128	-0.00046295	-0.092886	-0.032403	-0.0081334	-0.012552	0.024492	0.089456	0.13466	0.19437	0.20253	0.30444	0.41181	0.42508	0.40881	0.42255	0.33199	0.24983	0.20234	0.10018	0.085788	-0.016506	0.032919	-0.068358	-0.1326	-0.15013	-0.17452	-0.19925	-0.20052	-0.10279	-0.058785	-0.10032	-0.051279	-0.14557	-0.11826	-0.10914	-0.025985	-0.032087	-0.11717	-0.13503	-0.098648
-0.10261	-0.17953	-0.1062	-0.096676	-0.071263	-0.11979	-0.14834	-0.11797	-0.14865	-0.079971	-0.028778	-0.091099	-0.0053787	0.012697	-0.019038	0.0362	0.10662	0.12741	0.19022	0.21546	0.32784	0.44146	0.45389	0.44125	0.44751	0.34248	0.27575	0.20933	0.11391	0.11182	0.0089647	0.033967	-0.062751	-0.1178	-0.11351	-0.14513	-0.17492	-0.17434	-0.076721	-0.043099	-0.087957	-0.05369	-0.15327	-0.13083	-0.15077	-0.08661	-0.095696	-0.10968	-0.11279	-0.13004
-0.11004	-0.17387	-0.11912	-0.099515	-0.074912	-0.12848	-0.14232	-0.10394	-0.13779	-0.088732	-0.040705	-0.080243	-0.0028573	0.041854	0.027261	0.060467	0.13405	0.15746	0.21998	0.25677	0.36086	0.4645	0.47861	0.48738	0.47492	0.36411	0.27016	0.18902	0.11632	0.078724	-0.0040474	0.0065514	-0.069154	-0.13787	-0.1293	-0.14538	-0.16682	-0.15094	-0.091102	-0.059249	-0.08704	-0.01552	-0.11516	-0.11922	-0.1197	-0.025937	-0.046218	-0.09245	-0.12982	-0.14217
-0.10556	-0.17691	-0.14242	-0.11757	-0.10311	-0.14887	-0.14577	-0.12292	-0.17456	-0.11028	-0.07445	-0.082452	0.00017931	0.0049601	-0.017804	0.079733	0.1583	0.1555	0.22717	0.2658	0.36111	0.47139	0.48611	0.46921	0.43294	0.33987	0.21764	0.14764	0.056946	0.028224	-0.042657	-0.053071	-0.125	-0.17006	-0.1816	-0.16109	-0.18343	-0.13647	-0.10086	-0.076543	-0.082197	0.029571	-0.039605	-0.04971	-0.052622	0.025328	-0.0012223	-0.034576	-0.11009	-0.11061
-0.10188	-0.18231	-0.15109	-0.117	-0.1148	-0.14059	-0.12074	-0.12612	-0.18147	-0.11969	-0.077381	-0.11178	-0.06013	-0.039788	-0.032332	0.081373	0.14998	0.16233	0.21874	0.24049	0.33431	0.44039	0.47286	0.45157	0.39822	0.30381	0.18102	0.13591	0.02272	-0.030152	-0.084509	-0.086468	-0.14757	-0.21016	-0.20993	-0.19116	-0.18303	-0.12077	-0.10515	-0.056511	-0.059276	0.055966	-0.011147	-0.014279	-0.010113	0.067101	0.019262	-0.044229	-0.094042	-0.086594
-0.071805	-0.17184	-0.14091	-0.099376	-0.09296	-0.13445	-0.12744	-0.16162	-0.19337	-0.12071	-0.086418	-0.11605	-0.060445	-0.062963	-0.042915	0.032076	0.10144	0.12706	0.20815	0.22742	0.32081	0.41276	0.4595	0.44307	0.40323	0.30353	0.19017	0.13759	0.024426	-0.0004163	-0.038916	-0.061886	-0.1293	-0.20785	-0.20981	-0.16125	-0.16595	-0.11166	-0.097076	-0.074995	-0.069771	0.038468	-0.039185	-0.034584	-0.031689	0.060012	0.0116	-0.021424	-0.065565	-0.085325
-0.071357	-0.18944	-0.1546	-0.095608	-0.083782	-0.17796	-0.15547	-0.15527	-0.15338	-0.080351	-0.067514	-0.07662	-0.031973	-0.017391	0.014067	0.075613	0.14455	0.18968	0.25591	0.25884	0.33678	0.43163	0.47195	0.43934	0.38097	0.30331	0.20097	0.11555	0.022604	-0.0058027	-0.039479	-0.064301	-0.1518	-0.20656	-0.21238	-0.12937	-0.13383	-0.11451	-0.089657	-0.097846	-0.10253	0.0058519	-0.065092	-0.054278	-0.069809	0.024533	-0.040422	-0.062336	-0.094752	-0.11245
-0.083316	-0.20496	-0.18916	-0.11047	-0.099787	-0.17298	-0.15764	-0.13107	-0.12832	-0.055395	-0.073777	-0.069273	-0.01739	-0.012113	0.029111	0.099515	0.17442	0.19839	0.27005	0.27251	0.34953	0.42689	0.45736	0.39933	0.36698	0.2942	0.20847	0.097047	0.021581	-0.0068849	-0.073146	-0.067028	-0.14197	-0.17115	-0.18056	-0.12045	-0.095551	-0.082598	-0.088429	-0.10288	-0.10334	0.019749	-0.065954	-0.058824	-0.078521	-0.0060955	-0.072886	-0.065286	-0.11175	-0.13426
-0.1193	-0.20925	-0.2174	-0.14903	-0.11528	-0.16173	-0.14142	-0.11097	-0.10837	-0.05188	-0.061142	-0.067651	-0.059067	-0.040686	0.0080293	0.087903	0.16473	0.1811	0.24737	0.25977	0.31202	0.38379	0.39151	0.35279	0.31	0.26097	0.17585	0.1079	0.03482	-0.0094257	-0.064491	-0.066099	-0.12629	-0.11826	-0.12397	-0.067649	-0.069799	-0.11238	-0.082596	-0.11099	-0.066283	0.031304	-0.025781	-0.0069608	-0.060098	0.0037837	-0.076994	-0.045851	-0.10954	-0.10286
-0.11021	-0.20846	-0.18353	-0.13213	-0.079071	-0.085214	-0.063431	-0.10026	-0.10312	-0.022251	-0.017531	-0.06433	-0.049632	-0.067032	-0.066716	0.04634	0.12053	0.147	0.19503	0.17208	0.2184	0.29708	0.30999	0.29054	0.24202	0.16427	0.13385	0.13142	0.034027	-0.007881	-0.081621	-0.081633	-0.15066	-0.11344	-0.12171	-0.038371	-0.070804	-0.10277	-0.11058	-0.086158	-0.080133	0.028127	0.010816	-0.020227	-0.03856	0.023572	-0.0036601	-0.063982	-0.13045	-0.10734
-0.099355	-0.14543	-0.12705	-0.06024	-0.011707	-0.023208	-0.057034	-0.074077	-0.10326	-0.065918	-0.030365	-0.072546	-0.068837	-0.087491	-0.08589	0.013378	0.090815	0.093826	0.15363	0.13478	0.17404	0.2207	0.25571	0.26317	0.21028	0.13397	0.11603	0.10541	0.048895	-0.035826	-0.081803	-0.088631	-0.092238	-0.098658	-0.082287	-0.028685	-0.073174	-0.10084	-0.095281	-0.088717	-0.06092	0.024619	-0.04331	-0.045538	-0.026291	0.067663	-0.005496	-0.033475	-0.10002	-0.12814
-0.03131	-0.10623	-0.10099	-0.016442	0.039057	0.023888	-0.018335	-0.075148	-0.087031	-0.053197	-0.022841	-0.06162	-0.091268	-0.10825	-0.10038	0.0068866	0.070983	0.05471	0.14028	0.13099	0.19126	0.19314	0.20127	0.19412	0.16109	0.1169	0.056769	0.070806	-0.0017002	-0.054692	-0.08171	-0.053749	-0.09563	-0.09345	-0.1058	-0.054901	-0.094826	-0.086582	-0.065818	-0.056083	-0.026459	0.004054	-0.021045	-0.022009	0.00010107	0.039827	0.002069	-0.034692	-0.12033	-0.086827
0.033004	-0.050287	-0.050707	0.018101	0.056957	0.00070927	-0.0043816	-0.037037	-0.064259	-0.01037	-0.017524	-0.0078985	-0.059232	-0.058958	-0.033501	-0.00029965	0.029102	0.043249	0.070125	0.045993	0.09736	0.12066	0.11208	0.12307	0.090182	0.083067	0.031159	-0.0010563	-0.022564	-0.078149	-0.07396	-0.094788	-0.095483	-0.1244	-0.082815	-0.063491	-0.03541	-0.091983	-0.049914	-0.055182	-0.011423	-0.032603	-0.047941	-0.018135	-0.00247	0.092421	0.038743	-0.00080028	-0.07406	-0.052866
0.031532	-0.028189	-0.045899	0.010073	0.070083	0.049476	0.026104	0.023082	0.0062844	0.054876	0.059287	0.031086	-0.061035	0.011855	0.0056464	0.048796	0.029585	0.057357	0.096054	0.097271	0.074025	0.063077	0.051036	0.075382	0.041599	0.048809	-0.022527	-0.027537	-0.033163	-0.13378	-0.078449	-0.10516	-0.10515	-0.12676	-0.075334	-0.07104	-0.09713	-0.10861	-0.090769	-0.07413	-0.016653	-0.032614	-0.040935	-0.029499	0.042636	0.052065	0.014826	-0.04694	-0.071558	-0.052352
0.013617	-0.029347	-0.0088464	0.043423	0.05807	0.084335	0.058901	0.020464	0.030113	0.086101	0.081618	0.062079	0.035586	0.024534	0.0066144	0.015053	0.006975	0.015409	0.040656	0.050723	0.027714	0.032266	0.0085622	-0.027748	-0.036174	0.016093	-0.01692	-0.048824	-0.046808	-0.13294	-0.12366	-0.13634	-0.15365	-0.11247	-0.095829	-0.04982	-0.087104	-0.087569	-0.041223	-0.03004	-0.033812	-0.019439	0.015979	0.034775	-0.0045366	0.059594	0.065429	0.028723	-0.06014	-0.028664
0.035324	0.038597	0.02357	0.096253	0.10058	0.11853	0.084147	0.067408	0.012135	0.091091	0.094155	0.048986	0.022824	0.07961	0.042597	0.036483	-0.030223	0.012496	0.022166	0.00036126	-0.057857	-0.057795	-0.054901	-0.05802	-0.076799	-0.060314	-0.084672	-0.081577	-0.050348	-0.13767	-0.090328	-0.12168	-0.10491	-0.10323	-0.084103	-0.086775	-0.097246	-0.088316	-0.033824	-0.002541	-0.034931	-0.013802	-0.013314	0.0086834	-0.019155	0.034082	0.0081848	0.0011519	0.0094333	0.045728
-0.045495	-0.046303	-0.015325	0.0097772	0.021619	0.032124	0.0037552	-0.0028654	-0.015954	0.043898	0.040196	0.065948	0.070058	0.060867	0.024422	-0.0077653	-0.06223	-0.0073025	0.0085527	-0.050556	-0.045715	-0.036201	-0.040451	-0.041938	-0.05199	-0.0060568	-0.021142	0.0009528	0.026585	-0.065064	-0.061612	-0.091812	-0.040886	-0.064664	-0.077317	-0.072	-0.048174	-0.018942	-0.013072	0.0016816	0.0020115	0.029712	0.024485	0.034529	-0.061552	-0.033277	-0.005315	0.0018143	-0.016203	-0.019373
-0.012511	-0.032555	0.02927	0.050603	0.071256	0.0041025	-0.025544	-0.030525	-0.019485	0.040891	0.051298	0.078357	0.056208	0.05708	0.049902	0.03177	-0.017125	0.023742	0.015573	0.0066716	-0.0055207	-0.007938	0.015114	0.034236	0.0076569	0.023015	-0.016605	0.03662	-0.0024865	-0.052321	-0.049108	-0.089152	-0.049863	-0.059637	-0.095842	-0.08845	-0.017993	-0.045747	0.030489	0.012108	-0.0086096	-0.016233	0.012846	-0.02113	-0.10929	-0.032075	-0.021745	-0.046484	-0.022913	-0.049487
-0.0031852	0.021185	0.02294	0.056136	0.052442	0.0052443	0.03887	-0.02278	-0.046262	0.0074926	0.02209	0.097475	0.080228	0.053531	0.034147	0.011089	-0.06375	-0.037011	-0.0031632	-0.018825	-0.016435	-0.0021285	0.015529	0.025625	0.029274	0.029814	0.017606	0.031715	0.029521	-0.00075439	-0.0016438	-0.04238	-0.023826	-0.042401	-0.093715	-0.085267	-0.033221	-0.04476	0.01596	0.0020663	-0.03338	-0.070118	-0.04937	-0.090075	-0.089276	-0.059118	-0.064317	-0.05819	-0.084229	-0.085206
-0.03829	-0.0092011	0.064572	0.11843	0.066021	0.075881	0.045353	0.00023035	-0.027431	-0.0042923	0.0012613	0.058729	0.042045	0.018513	0.056494	-0.0051842	-0.050639	-0.034722	0.032428	-0.0045933	0.013113	-0.00093757	-0.00090265	-0.033576	-0.0077343	-0.016368	-0.036227	-0.018264	-0.011999	-0.0046074	0.028575	0.00048184	0.0075434	-0.076065	-0.038671	0.018845	0.033557	-0.040428	-0.0063753	-0.016219	-0.033814	-0.05731	-0.0011698	-0.020718	-0.049556	0.03995	-0.010312	-0.032639	-0.021278	-0.032913
-0.016769	-0.010123	0.0079117	0.11892	0.11644	0.076328	0.099943	0.049995	0.019084	0.030816	0.023275	0.092897	0.061116	0.022902	-0.018858	-0.013935	-0.060459	-0.020263	-0.001397	-0.026773	-0.058787	-0.026843	-0.025373	-0.034291	-0.086778	-0.067681	-0.10823	-0.051257	-0.038921	-0.092947	-0.023376	-0.085669	-0.031934	-0.032544	-0.033534	0.020058	0.0169	-0.01009	-0.025367	-0.040854	-0.0081227	-0.0069192	0.086327	0.028885	0.023645	0.055905	0.019853	-0.015293	0.0059958	-0.016681
-0.028757	0.011642	0.090766	0.12554	0.12316	0.12218	0.093133	0.051195	0.012206	0.0092569	0.026846	0.058901	0.017623	-0.031275	-0.010709	0.016166	-0.026396	0.0060992	0.03268	-0.016176	-0.04047	-0.029782	-0.013479	-0.094599	-0.13133	-0.15172	-0.1956	-0.13761	-0.084298	-0.14597	-0.11744	-0.19738	-0.13402	-0.13172	-0.077164	0.01114	0.018973	-0.070908	-0.072414	-0.074004	-0.029072	0.0031907	0.099686	0.11774	0.049596	0.099564	0.057497	0.042257	0.035792	0.031514
0.017433	0.016388	0.067855	0.089455	0.078986	0.05609	0.079266	0.047042	0.028727	0.023645	0.037558	0.036461	0.024488	-0.038935	-0.065602	0.014808	0.034887	0.017982	0.033431	0.0084337	-0.04591	-0.012306	-0.02155	-0.068206	-0.11968	-0.10399	-0.16923	-0.13074	-0.10865	-0.17049	-0.16982	-0.19582	-0.18285	-0.12345	-0.10721	-0.032317	-0.017941	-0.068049	-0.049717	-0.038542	-0.036693	-0.0072397	0.056331	0.095947	0.077431	0.065063	0.087146	0.061138	0.0016679	-0.010508
0.05042	0.054224	0.11008	0.094236	0.076946	0.047965	0.11365	0.094653	0.061229	0.059856	0.052502	0.06187	0.036177	-0.0095141	-0.046708	0.0056887	-0.0019258	-0.018463	-0.022154	-0.070166	-0.096015	-0.089506	-0.09664	-0.11607	-0.1641	-0.12382	-0.14322	-0.13042	-0.10923	-0.1171	-0.065542	-0.092782	-0.12545	-0.075982	-0.0090048	0.026432	0.060589	-0.014329	-0.02612	-0.071519	-0.047288	-0.060741	-0.047576	-0.0015047	-0.016904	-0.027159	0.022871	0.046775	0.029451	0.00196
0.071607	0.083257	0.086497	0.096395	0.086178	0.076905	0.13517	0.12375	0.09711	0.082897	0.056716	0.047947	0.0075766	-0.0046093	-0.025854	-0.0093846	-0.060823	-0.077708	-0.10426	-0.088205	-0.1479	-0.1865	-0.19901	-0.17028	-0.22461	-0.175	-0.19493	-0.15119	-0.1005	-0.080721	-0.051641	-0.033087	-0.088434	-0.040071	-0.0019767	0.066484	0.057612	-0.0014428	-0.008607	-0.069098	-0.057841	-0.12476	-0.095872	-0.080611	-0.03869	-0.09421	-0.044767	0.0033056	-0.015202	-0.014263
0.082665	0.049817	0.054901	0.042896	0.064477	0.071471	0.13361	0.11204	0.10265	0.11708	0.086157	0.070374	0.058558	0.054599	0.042857	0.031782	-0.016698	-0.020961	-0.014233	-0.042077	-0.087981	-0.13117	-0.15818	-0.18067	-0.22502	-0.16906	-0.18075	-0.14785	-0.13343	-0.098104	-0.063765	-0.054759	-0.08469	-0.045878	0.03997	0.0652	0.06442	0.021156	-0.024764	-0.06956	-0.086208	-0.14672	-0.098272	-0.042727	-0.0602	-0.071727	-0.029589	0.00047315	-0.031729	-0.026631
0.077347	0.046082	0.028418	0.023775	0.021168	0.072378	0.07992	0.1283	0.10112	0.112	0.045845	0.053657	0.03862	0.051316	0.033605	0.0055352	-0.0056821	0.0039299	-0.02661	-0.0011478	-0.055124	-0.11893	-0.16012	-0.16964	-0.19155	-0.154	-0.18803	-0.14369	-0.10041	-0.10912	-0.060788	-0.045779	-0.060167	0.0089873	0.022775	0.073586	0.033964	0.023715	0.027925	-0.035579	-0.035988	-0.086662	-0.029059	0.014349	-0.015274	-0.04595	-0.0040138	-0.012342	-0.004522	-0.012749
[truncated: 11 more columns]

## Sheet: Figure3_supplement2D_Offset
-0.015907	-0.015035	0.070207	0.062304	0.010514	0.037303	0.046152	0.038295	0.057047	0.064049	0.10815	0.028019	0.046852	0.10716	0.097395	0.1027	0.051519	0.022949	0.075208	0.081743	0.054889	-0.012599	-0.13146	-0.25484	-0.30439	-0.32122	-0.2979	-0.29179	-0.26035	-0.26557	-0.19515	-0.10318	-0.074733	-0.064908	-0.066008	0.026821	0.089613	0.10088	0.041784	0.059892	0.086053	0.097049	0.11283	0.071161	0.10888	0.099196	0.078477	0.11876	0.076188	0.1149
0.0094933	0.0055654	0.10044	0.08623	0.02748	0.065296	0.057666	0.071206	0.10235	0.092382	0.073581	-0.014497	0.023919	0.043991	0.088349	0.092289	0.078245	0.012188	0.064742	0.057865	0.04963	-0.030496	-0.14183	-0.29448	-0.32639	-0.3194	-0.29078	-0.32207	-0.30572	-0.31833	-0.23941	-0.167	-0.11954	-0.11302	-0.09884	0.041183	0.089072	0.091314	0.020808	0.055681	0.099121	0.079709	0.11252	0.12168	0.16137	0.11418	0.11441	0.13932	0.077372	0.10997
0.039366	0.045761	0.10584	0.090284	0.039734	0.082092	0.077965	0.10782	0.11183	0.083531	0.063281	-0.073889	-0.042737	0.0046486	0.056846	0.044393	0.048054	0.020461	0.064269	0.044674	0.01257	-0.038423	-0.084787	-0.2057	-0.25633	-0.26005	-0.22216	-0.24091	-0.21823	-0.23201	-0.14967	-0.13358	-0.082339	-0.045337	-0.020178	0.084334	0.10396	0.096132	0.0068726	0.0081461	0.030539	0.025743	0.1233	0.09761	0.17591	0.097305	0.10005	0.12515	0.07589	0.035284
0.088434	0.07802	0.11578	0.074458	0.12386	0.15931	0.14888	0.14283	0.10649	0.066271	0.047884	-0.061629	0.0042855	0.022854	0.064459	0.088777	0.088234	0.022261	0.086834	0.047597	-0.017576	-0.048421	-0.067295	-0.1803	-0.21057	-0.19828	-0.15895	-0.18312	-0.18182	-0.17526	-0.10438	-0.17025	-0.074769	-0.03709	0.0016507	0.074693	0.055035	0.014191	-0.049466	-0.057875	-0.034264	-0.032839	0.035234	0.089599	0.15027	0.064554	0.13181	0.12815	0.09606	0.027906
0.034545	0.03254	0.076375	0.022682	0.0041539	0.037575	0.021283	0.040494	0.012693	-0.041422	-0.012563	-0.057307	-0.0082334	0.013369	0.055844	0.047103	0.078212	0.032099	0.066938	-0.0041894	-0.031587	-0.058253	-0.010197	-0.084894	-0.11311	-0.08665	-0.043351	-0.095575	-0.10194	-0.072274	-0.044473	-0.096678	-0.012063	0.032408	0.021489	0.048467	0.065478	0.033004	-0.0066392	-0.041932	-0.051614	-0.032329	0.019643	0.09155	0.13954	0.040273	0.090628	0.15366	0.091007	0.074691
0.0039547	-0.025767	0.086738	0.034323	-0.021965	-0.039841	-0.045002	-0.029576	-0.014336	-0.048152	0.045585	0.042458	-0.013872	0.0019642	0.099578	0.081376	0.078891	0.066528	0.065981	0.054537	0.031154	0.020305	0.039279	-0.024037	-0.06038	-0.051736	-0.0068809	-0.025891	-0.031217	0.0062424	0.029571	-0.010883	0.060666	0.067101	0.045639	-0.012519	0.043084	0.014755	0.00041385	-0.024178	-0.076036	-0.058699	0.012933	0.06343	0.085913	0.047933	-0.011932	0.039672	0.036148	-0.025649
0.026142	-0.019984	0.058117	0.0014697	-0.045734	-0.050123	-0.083968	-0.094946	-0.065571	-0.029985	0.050066	0.016296	-0.060679	-0.021146	0.050351	0.029731	-0.02006	-0.038771	-0.00096691	0.0027528	-0.008315	-0.019859	0.025952	-0.019774	-0.035986	0.0080467	0.044678	0.018771	0.042539	0.069267	0.044991	0.055493	0.082873	0.10684	0.063546	-0.029335	0.032744	-0.014715	-0.044606	-0.051782	-0.098729	-0.064699	0.0099146	0.015196	0.066034	0.061379	-0.036132	0.068481	0.051976	-0.021263
0.047603	0.024382	0.034262	0.0079447	0.0087586	-0.014059	-0.0066486	-0.020167	-0.052006	-0.046842	-0.0050237	-0.0050499	-0.027363	-0.0041287	0.045972	-0.0033197	-0.042637	-0.050182	-0.075768	-0.047574	-0.047169	-0.070088	-0.026216	-0.058439	-0.069971	-0.049421	-0.026548	0.0016576	0.050393	0.030503	0.04182	0.077714	0.099225	0.10741	0.078153	0.050265	0.065073	-0.0061247	-0.063762	-0.020194	-0.034084	-0.0057181	0.041734	0.063085	0.08233	0.051955	-0.056799	0.0016259	0.075262	-0.0016065
0.085838	-0.0054381	0.010473	0.032408	0.043909	0.034296	0.072057	0.036599	-0.028996	-0.064553	-0.010696	-0.038853	0.053642	0.054418	0.046446	-0.0028915	-0.032225	-0.032789	-0.022491	-0.025456	-0.010331	-0.077387	-0.085599	-0.11407	-0.13653	-0.096337	-0.095917	-0.07929	0.037008	-0.0099931	0.0098248	0.078346	0.096184	0.092022	0.073722	0.094362	0.11042	-0.0084181	-0.069232	-0.021624	0.0093447	0.048847	0.05365	0.049734	0.046759	0.025159	-0.048838	0.0092788	0.021472	-0.026765
0.11314	-0.012532	-0.026801	0.036566	0.079928	0.021477	0.046486	0.043294	0.010705	-0.025585	0.037042	0.047787	0.10889	0.084792	0.037588	0.012697	-0.031198	0.0046653	0.035952	-0.0079726	-0.030692	-0.10554	-0.079291	-0.11588	-0.11748	-0.12991	-0.10407	-0.078181	-0.0013221	-0.03041	-0.028742	0.031869	0.035817	0.051511	0.027173	0.08592	0.098158	-0.015003	-0.075491	-0.042202	0.0082611	0.012355	-0.015073	-0.016982	-0.0077264	-0.03609	-0.062384	-0.0077715	-0.040584	-0.024451
0.059999	-0.039076	0.013935	0.027717	0.066523	0.033226	0.0097296	0.01661	0.033704	0.0033685	0.074898	0.062978	0.094342	0.085331	0.054745	-0.03223	0.0029341	0.030491	0.0049814	-0.0021802	-0.028815	-0.11931	-0.11976	-0.13873	-0.13162	-0.11647	-0.10709	-0.087079	0.0027433	-0.023031	-0.033752	0.019979	0.035292	0.023842	0.012117	0.047608	0.1021	-0.016027	-0.037994	0.006076	0.046259	0.063266	0.024266	0.0074681	-0.0016376	-0.015663	-0.084904	-0.043685	-0.097664	-0.084365
0.065525	-0.0022218	-0.039569	-0.02922	0.033693	-0.073015	-0.089965	-0.10066	-0.052948	-0.019502	0.02365	0.071574	0.040648	0.048614	-0.0094697	-0.072448	-0.07112	0.020726	-0.024667	-0.053586	-0.029209	-0.10219	-0.044473	-0.0053177	0.027744	0.045211	0.066772	0.070386	0.1134	0.10267	0.05756	0.066876	0.07267	0.079874	0.032482	0.050543	0.11548	0.032116	0.026364	0.061378	0.06983	0.08853	0.033468	-0.01254	-0.024991	-0.031948	-0.040948	-0.047682	-0.11852	-0.067059
0.051404	-0.0080974	-0.053519	-0.031584	0.011673	-0.10002	-0.065475	-0.091934	-0.053351	-0.011303	-0.033342	0.027246	0.0084064	0.036587	-0.011714	-0.057887	-0.066928	0.010618	-0.032689	-0.10269	-0.066726	-0.10873	9.0801e-05	0.091165	0.14467	0.1537	0.1856	0.21645	0.24203	0.18181	0.15997	0.14608	0.13905	0.12295	0.048729	0.034071	0.024201	0.010595	0.074926	0.065843	0.062808	0.081353	0.029489	-0.026921	-0.031309	-0.074579	-0.057734	-0.13622	-0.12215	-0.041681
0.034822	0.0038083	-0.031458	0.03036	0.034652	-0.080643	-0.025953	-0.062868	-0.057222	-0.052106	-0.067927	0.017238	-0.053867	-0.0076696	-0.031069	-0.028953	-0.075867	0.0010936	-0.062385	-0.10264	-0.031557	-0.085741	0.022906	0.091089	0.13941	0.12618	0.16947	0.2132	0.22698	0.17895	0.15732	0.1359	0.13124	0.14574	0.080765	0.062627	0.064597	0.017465	0.11047	0.1256	0.10475	0.05467	0.018505	-0.024284	-0.020476	-0.092576	-0.060362	-0.15358	-0.065203	-0.0062882
-0.02874	-0.044123	-0.012991	0.063496	0.02967	-0.079297	-0.038587	-0.052552	-0.059906	-0.044522	-0.055232	0.016539	-0.067242	-0.0057379	-0.030954	-0.042717	-0.063791	0.021583	-0.060215	-0.093723	-0.0089274	-0.063447	-0.010622	0.05318	0.092429	0.087545	0.13291	0.16158	0.19788	0.20399	0.19812	0.18908	0.17389	0.16853	0.10563	0.094776	0.088019	0.036383	0.13938	0.13866	0.14758	0.065119	0.04566	-0.018592	-0.0076148	-0.09097	-0.10742	-0.1612	-0.080725	-0.029786
-0.03869	-0.088277	0.0053352	0.018438	-0.015811	-0.096427	-0.10944	-0.11863	-0.082116	-0.02497	-0.051743	-0.0086774	-0.11628	-0.053471	-0.091236	-0.07354	-0.11377	-0.017482	-0.072712	-0.074404	0.011654	-0.071347	-0.026435	0.033934	0.11819	0.11748	0.13741	0.17437	0.20422	0.18957	0.17858	0.11752	0.11201	0.12646	0.039038	0.07287	0.10177	0.052192	0.11369	0.13915	0.10903	0.059773	0.034256	0.015849	0.071382	-0.030992	-0.041699	-0.072981	-0.05875	0.059072
-0.092188	-0.13886	-0.043669	-0.062217	-0.058485	-0.10564	-0.13995	-0.18633	-0.095052	-0.05414	-0.10977	-0.055287	-0.14287	-0.11581	-0.12375	-0.092843	-0.1069	-0.027569	-0.082904	-0.10224	-0.03868	-0.11125	-0.029166	0.049319	0.15592	0.17455	0.19075	0.20856	0.21173	0.21775	0.22557	0.16059	0.14434	0.099009	0.038422	0.061095	0.074207	0.11187	0.12667	0.12406	0.10875	0.063713	0.049325	0.040409	0.072682	0.039255	0.0020871	-0.065797	-0.049803	0.047232
-0.079227	-0.10449	-0.068421	-0.071287	-0.053075	-0.10431	-0.15511	-0.1864	-0.1332	-0.12555	-0.13563	-0.10391	-0.1776	-0.13937	-0.12729	-0.072153	-0.08993	-0.029548	-0.072299	-0.093134	-0.0013614	-0.0829	-0.0067984	0.078649	0.16622	0.19026	0.2064	0.2619	0.26005	0.2361	0.25804	0.17707	0.17595	0.17744	0.11723	0.14316	0.12217	0.12778	0.12318	0.11209	0.12176	0.10727	0.096038	0.066257	0.080304	0.019015	-0.0056486	-0.082791	-0.09443	-0.017299
-0.053184	-0.077788	-0.059053	-0.047744	-0.056495	-0.10627	-0.13925	-0.17912	-0.1167	-0.10754	-0.13767	-0.10686	-0.16013	-0.13541	-0.099663	-0.04932	-0.073243	-0.04189	-0.033425	-0.050574	-0.0022239	-0.045517	0.005223	0.073541	0.13898	0.14409	0.15472	0.20499	0.24796	0.22619	0.24321	0.21396	0.19387	0.18002	0.17119	0.16947	0.14608	0.13061	0.13324	0.1614	0.16834	0.16055	0.10448	0.072284	0.063367	-0.020578	-0.054941	-0.12626	-0.084241	-0.056491
-0.00081386	-0.019966	-0.024231	-0.01936	0.011229	-0.031184	-0.060623	-0.11181	-0.050287	-0.045981	-0.097919	-0.10425	-0.12654	-0.10484	-0.040725	-0.020621	-0.052411	-0.051415	-0.092729	-0.054705	-0.023593	-0.063608	0.0039587	0.057368	0.098325	0.10467	0.090879	0.16171	0.21051	0.18562	0.21754	0.20092	0.15612	0.1653	0.15583	0.17249	0.17165	0.08304	0.15677	0.14298	0.16543	0.14818	0.11208	0.057604	0.044713	-0.039568	-0.080507	-0.11625	-0.056669	-0.045581
0.0069851	0.0042666	0.052365	-0.002035	0.018617	0.0043484	-0.042998	-0.075469	0.0088917	0.006092	-0.067927	-0.12389	-0.11773	-0.10264	-0.065805	-0.046048	-0.073769	-0.098068	-0.073742	-0.087106	-0.052857	-0.097443	-0.016835	0.037232	0.087742	0.10129	0.11526	0.17643	0.18919	0.16434	0.17511	0.17822	0.15972	0.16735	0.15619	0.11303	0.12593	0.10437	0.15372	0.1418	0.12318	0.13082	0.15078	0.055074	0.055874	-0.025242	-0.096744	-0.10281	0.028026	-0.020748
-0.084042	-0.039986	-0.00073156	-0.053621	-0.012459	-0.025947	-0.064823	-0.062513	-0.00016443	0.023121	-0.060405	-0.1711	-0.21223	-0.17452	-0.17565	-0.11607	-0.11355	-0.069011	-0.11428	-0.063476	-0.045919	-0.12461	-0.039034	0.051988	0.11804	0.14221	0.15086	0.17709	0.21841	0.21512	0.22011	0.17503	0.17015	0.18058	0.1618	0.084143	0.12764	0.11176	0.12586	0.11368	0.048786	0.095957	0.11373	0.044331	0.067586	0.021315	-0.033492	0.0084195	0.059543	-0.026578
-0.12047	-0.073601	-0.033732	-0.062779	-0.048945	-0.065727	-0.092457	-0.11769	-0.033994	-0.0021725	-0.087828	-0.19544	-0.23239	-0.20877	-0.20934	-0.12742	-0.15339	-0.093437	-0.10103	-0.060488	-0.058843	-0.13996	-0.017162	0.082101	0.14671	0.18535	0.19281	0.24337	0.25313	0.24661	0.23609	0.20382	0.22887	0.24493	0.1675	0.11971	0.13003	0.15777	0.12757	0.16007	0.070699	0.053669	0.093601	0.071984	0.065265	0.014359	-0.022198	-0.0022879	0.057709	0.0046081
-0.10809	-0.056265	-0.031135	-0.056919	-0.050139	-0.097432	-0.1035	-0.092277	-0.055048	-0.030222	-0.11028	-0.18346	-0.21047	-0.16349	-0.14945	-0.1204	-0.10934	-0.035157	-0.078887	-0.070075	-0.065748	-0.071394	0.051563	0.14057	0.1769	0.19839	0.23511	0.28585	0.30983	0.26314	0.23513	0.21174	0.26576	0.27263	0.16978	0.097534	0.13211	0.12291	0.11094	0.11957	0.0066267	0.014448	0.041919	0.040148	0.052853	0.022113	-0.013014	-0.040763	-0.010562	-0.051436
-0.023821	-0.051979	-0.053782	-0.018678	-0.039486	-0.11393	-0.091269	-0.10345	-0.10346	-0.080065	-0.096704	-0.12244	-0.12372	-0.1073	-0.13827	-0.091035	-0.093698	-0.028419	-0.090637	-0.089669	-0.051975	-0.014174	0.14697	0.22985	0.27864	0.27887	0.32431	0.39389	0.37677	0.25876	0.25031	0.24281	0.25727	0.26154	0.11565	0.060688	0.08284	0.066929	0.11758	0.11576	0.051129	0.01564	0.043666	0.031993	0.031787	-0.032213	-0.078746	-0.088301	-0.069693	-0.054798
-0.033606	-0.049902	-0.063022	-0.046731	-0.063693	-0.12988	-0.099617	-0.088996	-0.11657	-0.096172	-0.12041	-0.088009	-0.14347	-0.094374	-0.12189	-0.067202	-0.075182	-0.045997	-0.11045	-0.13415	-0.066843	0.0058932	0.17815	0.24602	0.31784	0.3341	0.39759	0.43209	0.37172	0.26677	0.22831	0.18337	0.20714	0.19866	0.083459	0.011015	0.011332	0.075859	0.10169	0.050611	-0.029895	-0.029706	0.025731	0.013075	0.022657	-0.027249	-0.058493	-0.067823	-0.018908	-0.0090083
-0.05315	-0.03421	-0.045656	-0.061803	-0.045979	-0.064341	-0.07653	-0.087257	-0.096652	-0.075972	-0.084058	-0.067901	-0.17839	-0.17001	-0.15526	-0.076959	-0.097746	-0.047049	-0.12896	-0.14732	-0.037261	-0.0010995	0.15095	0.26212	0.36592	0.38519	0.42639	0.45096	0.36076	0.24368	0.18499	0.11766	0.13964	0.13876	0.054377	0.013484	-0.0065885	0.095033	0.09958	0.035568	-0.049662	-0.060035	0.015861	0.037601	0.06471	-0.029252	-0.03359	-0.048156	0.0064987	0.0041427
-0.08357	-0.02789	-0.033923	-0.077154	-0.049626	-0.084842	-0.092976	-0.10185	-0.10139	-0.039518	-0.11517	-0.12666	-0.22709	-0.20107	-0.17018	-0.10672	-0.13834	-0.077332	-0.12836	-0.15079	-0.022134	0.038378	0.18469	0.2986	0.37693	0.40544	0.43693	0.43401	0.37206	0.28967	0.21743	0.16893	0.15625	0.15217	0.11201	0.034862	-0.007148	0.081883	0.077021	0.0034384	-0.085893	-0.063365	-0.00013227	-0.012291	0.016396	-0.012778	-0.041945	-0.057521	-0.015	-0.032353
-0.091672	-0.083801	-0.088395	-0.12694	-0.068649	-0.090789	-0.11517	-0.11603	-0.098601	-0.051955	-0.13081	-0.14663	-0.24872	-0.20408	-0.18939	-0.12081	-0.14734	-0.085859	-0.10995	-0.13799	0.0096136	0.064968	0.21964	0.35718	0.45674	0.47184	0.46249	0.45192	0.40038	0.33979	0.28347	0.18931	0.1659	0.16166	0.10488	0.0044476	-0.079258	0.005926	0.027726	-0.01071	-0.083316	-0.078782	-0.053112	-0.021346	0.0069166	-0.027424	-0.031802	-0.050296	0.010475	-0.039227
-0.092698	-0.10269	-0.14887	-0.17761	-0.11984	-0.13421	-0.16521	-0.14629	-0.15582	-0.095251	-0.17227	-0.18398	-0.26797	-0.1999	-0.16571	-0.1356	-0.14477	-0.10811	-0.14389	-0.18172	-0.017506	0.072393	0.21273	0.36306	0.45455	0.46803	0.48604	0.47577	0.41358	0.36296	0.30749	0.21664	0.18466	0.17265	0.097425	0.001078	-0.056517	0.018189	0.063138	0.042925	-0.053538	-0.09814	-0.031827	-0.049333	-0.04175	-0.048075	-0.038409	-0.060538	-0.013296	-0.05829
-0.12761	-0.15004	-0.18431	-0.18558	-0.11366	-0.13462	-0.14479	-0.14456	-0.15517	-0.13878	-0.1985	-0.17947	-0.23848	-0.22782	-0.18816	-0.1521	-0.16397	-0.10471	-0.15527	-0.20349	-0.0048631	0.091822	0.23421	0.40821	0.50469	0.52637	0.55426	0.50129	0.43429	0.39793	0.33815	0.2298	0.20216	0.17678	0.06139	-0.024056	-0.068972	0.020716	0.066317	0.039953	-0.048779	-0.1045	-0.060623	-0.066741	-0.05672	-0.073097	-0.016665	-0.054428	0.0070771	-0.012213
-0.11435	-0.14047	-0.16814	-0.17286	-0.12969	-0.12405	-0.16077	-0.14815	-0.15913	-0.13074	-0.19113	-0.17759	-0.23361	-0.19901	-0.15956	-0.15727	-0.16007	-0.11869	-0.20772	-0.2124	-0.036502	0.10786	0.24096	0.38389	0.48839	0.51073	0.54584	0.52376	0.43992	0.37919	0.34539	0.26193	0.20973	0.17661	0.050613	-0.030453	-0.067824	0.033733	0.064967	0.053141	-0.035948	-0.10452	-0.050206	-0.077072	-0.040824	-0.050055	-0.014257	-0.036246	-0.0071186	-0.014953
-0.10484	-0.11892	-0.16064	-0.14342	-0.11248	-0.10146	-0.15088	-0.14246	-0.1566	-0.14985	-0.19768	-0.20276	-0.23034	-0.21085	-0.1958	-0.16187	-0.17802	-0.11351	-0.17196	-0.20365	-0.026941	0.094228	0.23724	0.40812	0.49102	0.512	0.56666	0.52485	0.44131	0.3959	0.3717	0.29538	0.22905	0.17597	0.070992	-0.019637	-0.061969	0.030495	0.07448	0.04911	-0.044332	-0.099808	-0.082758	-0.060747	-0.046434	-0.047823	-0.017553	-0.026982	0.015567	0.0072461
-0.1216	-0.11077	-0.14431	-0.13197	-0.12844	-0.12879	-0.17492	-0.16895	-0.15916	-0.1304	-0.20618	-0.19151	-0.23875	-0.20348	-0.17129	-0.14375	-0.18589	-0.11479	-0.16826	-0.17435	-0.027995	0.077536	0.21032	0.38873	0.48065	0.49844	0.52481	0.49131	0.38188	0.35333	0.33197	0.23959	0.15288	0.11822	0.045445	-0.055553	-0.10043	0.0071061	0.041334	0.012904	-0.05472	-0.13387	-0.097724	-0.082062	-0.068325	-0.029065	-0.0096653	-0.015772	0.030943	0.0308
-0.095509	-0.11351	-0.14427	-0.13336	-0.11461	-0.12452	-0.19167	-0.1707	-0.15399	-0.12053	-0.18503	-0.17462	-0.21711	-0.17793	-0.16147	-0.12141	-0.14607	-0.066501	-0.11741	-0.13259	-0.014146	0.096971	0.21326	0.36642	0.45143	0.45586	0.4887	0.45565	0.35253	0.30571	0.28142	0.19146	0.12582	0.091997	0.026084	-0.060737	-0.1225	-0.03222	0.015175	-0.010468	-0.11161	-0.1471	-0.11297	-0.086061	-0.056728	-0.02116	0.014282	-0.031253	0.019859	0.023207
-0.096954	-0.091649	-0.15528	-0.11861	-0.10516	-0.12695	-0.17575	-0.16369	-0.13842	-0.10527	-0.16568	-0.11518	-0.17295	-0.13646	-0.11052	-0.079614	-0.11328	-0.019985	-0.06981	-0.085457	0.021455	0.139	0.22851	0.38744	0.45545	0.46223	0.48689	0.45901	0.34652	0.32396	0.26538	0.18799	0.129	0.07405	0.045215	-0.065552	-0.11804	-0.0075802	0.019831	-0.025547	-0.10646	-0.12991	-0.090316	-0.10832	-0.10221	-0.026792	-0.024233	-0.061713	-0.021045	-0.018579
-0.082335	-0.082392	-0.12075	-0.091992	-0.085648	-0.1432	-0.15281	-0.17187	-0.17838	-0.13205	-0.13639	-0.091142	-0.15337	-0.1187	-0.096817	-0.044931	-0.06301	0.024979	-0.060012	-0.047906	0.06033	0.16043	0.25544	0.37781	0.43333	0.43169	0.45918	0.42562	0.34133	0.29644	0.23328	0.1886	0.14714	0.11262	0.035051	-0.055826	-0.082888	-0.015036	0.023736	-0.049764	-0.14609	-0.15857	-0.097098	-0.12007	-0.10407	-0.057849	-0.034174	-0.10578	-0.082288	-0.091509
-0.052836	-0.094606	-0.14978	-0.1037	-0.11644	-0.15444	-0.13052	-0.17025	-0.20706	-0.17841	-0.14514	-0.083663	-0.12134	-0.10272	-0.10362	-0.097991	-0.066074	0.031654	-0.069542	-0.056544	0.068623	0.16472	0.26927	0.36328	0.38359	0.37531	0.42137	0.38107	0.29484	0.25015	0.22744	0.1819	0.14029	0.12122	0.032248	-0.040159	-0.048464	-0.0028656	0.038828	-0.048057	-0.10383	-0.11638	-0.078115	-0.12517	-0.095307	-0.052802	-0.030222	-0.068164	-0.087881	-0.082469
-0.0451	-0.044833	-0.061488	-0.087206	-0.10303	-0.10377	-0.061419	-0.12776	-0.15376	-0.1295	-0.099753	-0.042971	-0.037417	-0.05573	-0.07487	-0.050415	-0.025546	0.013776	-0.066231	-0.016556	0.025482	0.14704	0.19384	0.20707	0.25226	0.2732	0.28634	0.26623	0.20708	0.16209	0.12775	0.11695	0.0448	0.042462	-0.013777	-0.036639	-0.044189	-0.033402	0.017606	-0.022805	-0.063176	-0.10096	-0.10424	-0.083342	-0.048954	-0.029931	-0.027448	-0.092486	-0.062189	-0.032279
-0.026669	-0.029636	-0.083928	-0.121	-0.11858	-0.098348	-0.044802	-0.090233	-0.10673	-0.072572	-0.099668	-0.05816	0.021047	-0.060652	-0.072553	-0.081312	-0.056842	-0.062622	-0.080631	-0.076867	0.015123	0.1609	0.1323	0.11995	0.15499	0.16176	0.18251	0.15356	0.099516	0.10318	0.037881	0.0079567	-0.017647	-0.062418	-0.058696	-0.057355	-0.10353	-0.06352	-0.010643	-0.016634	-0.010487	-0.074176	-0.10998	-0.069967	-0.076549	-0.066463	-0.044656	-0.09547	-0.061252	-0.03195
0.008404	0.026212	-0.057049	-0.064759	-0.070519	-0.033846	-0.019778	0.007674	-0.071968	-0.10916	-0.098356	-0.038635	0.012709	-0.022537	-0.035433	-0.10055	-0.084091	-0.074575	-0.083942	-0.043076	-0.027086	0.039801	0.079029	0.064069	0.071927	0.088878	0.080853	0.037737	0.016076	0.051067	0.0011104	-0.032721	-0.029583	-0.02304	-0.072555	-0.061002	-0.06749	-0.046542	-0.02799	-0.0025627	-0.015198	-0.048766	-0.060952	-0.040623	-0.042586	-0.061287	-0.030055	-0.030519	-0.075718	-0.023199
0.0075517	-0.01765	-0.03877	-0.027664	-0.044251	-0.06425	-0.0516	-0.0029021	-0.096427	-0.11485	-0.11019	-0.01906	0.065345	0.010126	-0.010251	0.0012923	-0.045406	-0.046919	-0.044381	-0.012171	-0.010056	0.096147	0.072768	0.083012	0.089424	0.061767	0.081972	0.058284	0.015422	0.058419	0.0198	-0.0086531	-0.00049396	-0.045644	-0.080093	-0.094357	-0.11097	-0.095936	-0.084285	-0.013949	-0.0069719	-0.063044	-0.063902	-0.073428	-0.1271	-0.10301	-0.063772	-0.097792	-0.017838	0.014755
-0.021809	-0.075844	-0.099545	-0.0069786	0.0047348	-0.028665	-0.029602	0.026429	-0.049499	-0.063089	-0.088984	0.021995	0.088513	0.081203	0.018273	0.028755	-0.0037865	0.0083361	-0.0089747	0.0055758	0.032874	0.070381	0.056633	0.10899	0.091293	0.086388	0.093008	0.083026	0.051709	0.093807	0.080757	0.063862	0.023073	-0.019346	-0.046324	-0.098205	-0.15127	-0.15234	-0.10758	-0.091776	-0.12155	-0.099772	-0.0597	-0.097627	-0.12507	-0.087149	-0.053151	-0.088038	-0.086325	-0.013834
-0.00063572	-0.054199	-0.024921	0.022288	0.032992	-0.0097508	-0.010914	0.029944	-0.047663	-0.062072	-0.044072	0.056231	0.09117	0.076521	0.064261	0.038496	0.03282	0.046597	0.049633	-0.014537	0.013721	0.050972	-0.015377	0.03552	0.050672	0.026518	0.034838	0.072408	0.043578	0.077415	0.033204	0.047045	0.0092317	-0.015686	-0.028241	-0.090011	-0.20292	-0.12756	-0.10789	-0.1288	-0.11287	-0.10694	-0.061418	-0.088967	-0.098596	-0.030592	-0.032517	-0.049367	-0.082033	-0.031855
0.0078603	-0.029207	-0.0049832	0.057992	0.016683	-0.010634	-0.016984	0.012724	-0.058649	-0.03701	-0.013216	0.066792	0.074393	0.08379	0.054306	0.052169	0.083365	0.095155	0.072421	0.018442	0.05974	0.03277	-0.022376	0.011327	0.0088173	-0.00036602	0.0016272	0.003462	-0.022773	0.020411	0.0057468	-0.011557	-0.027904	-0.0085312	0.0053137	-0.024908	-0.11111	-0.13684	-0.092047	-0.11158	-0.075397	-0.097245	-0.085978	-0.059933	-0.078805	-0.031447	-0.016754	-0.0051225	-0.09001	-0.047158
0.0058403	-0.0057064	0.074537	0.053953	0.017527	0.0013771	-0.0014876	0.051762	0.0070975	-0.037655	0.019283	0.13626	0.094734	0.044017	0.10965	0.085754	0.10561	0.070185	0.080189	0.034368	0.04292	0.051559	-0.020693	-0.015479	-0.0050967	0.0029326	-0.020796	-0.0078892	-0.044024	0.012746	-0.0098084	-0.00081395	-0.030478	0.03604	0.037877	-0.0028309	-0.092279	-0.066772	-0.031133	-0.071525	-0.050131	-0.060902	-0.054189	-0.019886	-0.018441	0.034511	0.01239	0.0010848	-0.086672	-0.059509
0.047233	0.019272	0.026085	0.030597	-0.022824	-0.0074356	-0.0093907	0.0064705	0.014606	-0.0089391	0.041931	0.12157	0.11363	0.066736	0.094872	0.12267	0.15684	0.054201	0.10703	0.088959	0.078444	0.025436	-0.0079994	-0.035101	-0.031109	-0.020052	-0.043635	-0.063959	-0.079624	-0.024248	-0.021356	-0.026785	-0.058174	-0.015784	0.027597	0.0049954	-0.035839	-0.024308	-0.055982	-0.093094	-0.05115	-0.061983	-0.053786	-0.055421	-0.0050161	0.070369	0.040567	0.068509	-0.056579	-0.046519
0.071887	0.06529	0.031814	-0.021512	0.009637	0.030125	0.06589	0.041775	0.0446	0.035749	0.03313	0.12921	0.15081	0.086029	0.15169	0.14368	0.13179	0.041787	0.094768	0.04836	0.0080103	0.027695	-0.032506	-0.066946	-0.047737	-0.036869	-0.032971	-0.076675	-0.053888	-0.0042327	-0.036065	-0.061705	-0.077963	-0.026098	0.016551	-0.025117	-0.069794	-0.036772	-0.093046	-0.15003	-0.075668	-0.054761	-0.062015	-0.070759	-0.03101	0.054161	0.037189	0.029023	-0.02543	-0.030506
0.051226	0.036541	0.053345	0.0045708	0.063963	0.072996	0.085279	0.061462	0.076447	0.0018265	0.032129	0.15703	0.22885	0.16775	0.17742	0.15258	0.12776	0.038006	0.091716	0.093132	-0.026103	-0.073796	-0.081201	-0.11275	-0.11362	-0.13282	-0.13837	-0.14107	-0.14102	-0.10742	-0.087364	-0.10567	-0.095621	-0.067438	-0.027034	-0.024903	-0.017113	0.0087979	-0.033398	-0.094747	-0.065909	-0.052094	-0.06882	-0.045059	-0.044976	0.0021488	0.06813	0.051816	-0.017988	0.044904
-0.033276	-0.022405	-0.0028381	-0.01263	0.0020975	0.042005	0.086981	0.075766	0.061095	0.060916	0.084125	0.11943	0.17677	0.13783	0.096245	0.080589	0.099385	0.0090573	0.054657	0.00593	-0.033459	-0.10584	-0.11871	-0.17953	-0.18768	-0.14607	-0.16638	-0.22045	-0.23852	-0.1361	-0.11515	-0.14688	-0.11899	-0.089053	-0.11034	-0.068897	-0.046872	-0.044725	-0.098162	-0.11716	-0.047523	-0.016999	-0.01538	0.0034155	-0.0044375	0.039964	0.066529	0.13019	0.042056	0.076919
-0.020093	-0.090939	-0.019032	-0.00063185	-0.015143	0.033893	0.050019	0.086275	0.065756	0.1021	0.085649	0.11962	0.10336	0.063716	0.052681	0.010564	0.056479	0.022603	0.10778	-0.0026596	-0.030654	-0.055459	-0.067201	-0.14247	-0.12934	-0.11114	-0.13611	-0.1906	-0.21173	-0.1378	-0.10875	-0.13549	-0.16854	-0.1152	-0.1287	-0.11779	-0.13731	-0.12037	-0.15281	-0.1503	-0.087606	-0.043342	-0.033418	-0.013713	0.041801	0.059209	0.065833	0.072437	0.044948	0.066863
-0.052076	-0.10507	-0.0801	-0.054093	-0.0083297	0.046445	0.052114	0.08116	0.12234	0.10341	0.12015	0.10314	0.088088	0.050168	-0.0055049	-0.023339	-0.034601	0.00085956	0.072606	0.010812	-0.03555	-0.018908	-0.030081	-0.060553	-0.051449	-0.052193	-0.065459	-0.11968	-0.14182	-0.041661	-0.038626	-0.078157	-0.099042	-0.13176	-0.13239	-0.14469	-0.16756	-0.091771	-0.15094	-0.16141	-0.098369	-0.011945	-0.024581	0.025231	0.055828	0.058877	0.089947	0.050092	0.043326	0.044815
0.023551	-0.039424	-0.071373	-0.005814	-0.0017002	0.035538	0.041171	0.061026	0.061827	0.030096	0.08444	0.078135	0.090414	0.051928	-0.0077592	-0.015531	-0.011197	-0.011269	0.06457	-0.04484	-0.10563	-0.059813	-0.057551	-0.058761	-0.06055	-0.06305	-0.079912	-0.10642	-0.12732	-0.027335	-0.00014415	-0.059699	-0.0817	-0.11622	-0.083266	-0.09592	-0.17066	-0.08156	-0.10498	-0.12863	-0.030207	0.02822	-0.017669	0.048141	0.028818	-0.0061336	0.0099275	-0.014769	-0.017183	-0.029726
0.087272	0.046522	0.0067275	0.060484	0.09937	0.087484	0.099062	0.093738	0.062105	0.029087	0.10509	0.18966	0.15482	0.075023	0.05377	0.02373	0.02192	0.043517	0.066569	-0.011246	-0.098973	-0.10168	-0.1097	-0.10968	-0.073799	-0.11995	-0.14608	-0.14878	-0.13471	-0.044042	-0.068715	-0.11671	-0.13748	-0.14275	-0.05908	-0.041708	-0.12467	-0.078562	-0.068527	-0.08911	0.0056241	0.015104	-0.087194	-0.01167	-0.063572	-0.090797	-0.021259	-0.031213	-0.05933	-0.013987
0.030679	0.0061543	0.010567	0.00061782	0.024428	0.054147	0.078799	0.08259	0.053927	0.038982	0.073701	0.13488	0.15551	0.092835	0.071583	0.074961	0.09315	0.011157	0.07939	-0.019101	-0.072784	-0.061153	-0.089681	-0.099672	-0.089653	-0.11758	-0.16967	-0.16615	-0.14276	-0.073104	-0.092078	-0.12493	-0.15437	-0.15229	-0.081877	-0.072862	-0.11785	-0.12458	-0.060084	-0.0478	0.040152	0.029206	0.0093738	-0.038242	-0.07924	-0.090817	-0.016467	-0.066522	0.00053199	0.013553
0.00014476	-0.0099597	-0.02575	-0.017036	-0.0091682	0.0011244	0.04267	0.039785	0.011704	0.021571	0.084862	0.14059	0.11205	0.10054	0.094492	0.089646	0.11484	0.073996	0.076639	0.0212	0.0022017	-0.0068177	-0.048213	-0.074213	-0.083417	-0.088765	-0.13155	-0.13962	-0.10095	-0.031291	-0.069345	-0.11233	-0.09663	-0.10769	-0.051044	-0.062057	-0.064198	-0.030754	-0.013123	-0.038778	0.055138	0.060825	0.068056	-0.01496	-0.082058	-0.048343	0.0118	-0.013422	0.010172	-0.0074669
0.019456	0.015884	0.06887	0.059819	0.049235	0.072569	0.07774	0.052281	0.071919	0.051614	0.077432	0.084587	0.050464	0.019701	-0.014521	0.00010295	0.055054	0.067968	0.036439	-0.0075993	-0.049971	-0.055981	-0.088606	-0.14781	-0.15092	-0.1564	-0.17921	-0.16065	-0.1373	-0.062044	-0.10824	-0.10822	-0.064362	-0.065658	-0.060283	-0.010911	-0.033466	0.0093151	0.005273	-0.041126	0.018802	0.033027	0.081766	-0.020396	-0.0040616	-0.010356	0.023855	0.01995	0.039166	-0.0028709
0.068918	0.035555	0.08413	0.052684	0.10262	0.075188	0.089834	0.08049	0.063308	0.071863	0.13261	0.095713	0.031511	0.021283	-0.0147	0.023302	0.095754	0.062459	0.058013	0.014023	0.041057	0.009724	-0.045002	-0.11696	-0.15454	-0.15921	-0.21482	-0.17565	-0.14757	-0.15497	-0.17876	-0.16459	-0.11113	-0.081	-0.079123	0.010899	0.017273	0.0052646	-0.035457	-0.043977	-0.0021822	0.040427	0.08108	0.011294	0.051548	0.034796	0.034767	0.010094	-0.017595	-0.061662
0.12467	0.111	0.10441	0.093071	0.13512	0.10394	0.11365	0.08003	0.037967	0.01718	0.10642	0.1651	0.10199	0.05755	0.041199	0.059545	0.098647	0.08726	0.078015	0.034906	0.010133	-0.0042157	-0.058584	-0.092007	-0.14642	-0.19125	-0.23051	-0.17928	-0.15101	-0.13825	-0.18286	-0.13929	-0.073848	-0.01587	0.0127	0.014619	0.002443	0.016425	0.018831	-0.0073012	0.01573	0.055966	0.058994	0.060658	0.030178	0.015092	-0.021626	0.0037752	-0.078381	-0.1093
0.13205	0.11603	0.13484	0.10786	0.14151	0.071565	0.12042	0.014176	-0.022851	-0.046147	0.087196	0.1626	0.11211	0.10097	0.10394	0.080347	0.12241	0.1206	0.1243	0.076784	0.060305	-0.008005	-0.060168	-0.070928	-0.12499	-0.1486	-0.18989	-0.16835	-0.12639	-0.10125	-0.12364	-0.083983	-0.006559	0.054758	0.075237	0.046145	0.047482	0.00094472	-0.015437	0.0089585	0.035422	0.062787	0.047875	0.037978	0.023484	-0.0030874	-0.056798	-0.044691	-0.11856	-0.12109
0.14011	0.12611	0.10554	0.11656	0.12851	0.054369	0.094218	0.015381	-0.050436	-0.091136	0.049574	0.15865	0.12861	0.12997	0.16391	0.1167	0.12566	0.13568	0.090017	0.050357	0.037149	-0.021913	-0.028421	-0.036467	-0.080427	-0.11845	-0.15981	-0.15555	-0.10631	-0.082557	-0.097782	-0.071218	-0.016895	0.055366	0.083068	0.063243	0.02702	-0.047654	-0.041726	-0.0089397	0.032484	0.0649	0.035857	0.026694	-0.011029	-0.044577	-0.065827	-0.053985	-0.12829	-0.13091
[truncated: 11 more columns]
