# Supplementary material for: A generalized cortical activity pattern at internally generated mental context boundaries during unguided narrative recall
Source: eLife. 2022 May 30;11:e73693. doi: 10.7554/eLife.73693 (PMC9177147; doi:10.7554/eLife.73693)
Supplement: Figure 3—figure supplement 3—source data 1. [file elife-73693-fig3-figsupp3-data1.xlsx]

## Sheet: Figure3_supplement3_PMC
	Recall-Recall		Encoding-Recall
	Offset	Middle	Offset	Middle
S1	0.1455	0.0583	0.0606	0.0298
S2	0.228	-0.006	0.1237	0.0039
S3	0.127	-0.0305	0.1696	0.0064
S4	0.4603	0.0177	0.308	0.0036
S5	0.4753	-0.0532	0.2199	0.0086
S6	0.5335	-0.018	0.4303	-0.0199
S7	0.3037	0.0116	0.208	-0.0049
S8	0.1902	0.0072	0.1315	0.0281
S9	0.3536	-0.0481	0.2682	-0.0058
S10	0.4165	0.0542	0.224	-0.0152
S11	0.2506	0.0197	0.1828	0.056
S12	0.5328	-0.027	0.0822	0.0594
S13	0.3613	0.0644	0.2949	-0.0119
S14	0.381	-0.0263	0.2789	0.0063
S15	0.3896	-0.0291	0.3331	-0.0066

## Sheet: Figure3_supplement3_ANG
	Recall-Recall		Encoding-Recall
	Offset	Middle	Offset	Middle
S1	0.1063	0.0311	0.0445	0.0017
S2	0.2822	0.0296	0.2543	0.0264
S3	0.1252	0.0489	0.0922	-0.0343
S4	0.3126	0.0201	0.1874	-0.0135
S5	0.4478	-0.0117	0.2317	-0.0027
S6	0.2906	0.0105	0.3477	-0.0028
S7	0.3206	-0.0579	0.2325	0.005
S8	0.2898	-0.0184	0.1131	-0.0066
S9	0.2463	-0.0041	0.2103	0.0349
S10	0.5252	0.0306	0.216	0.0197
S11	0.2625	0.025	0.0721	0.0095
S12	0.2524	-0.0651	0.0334	0.0537
S13	0.2974	0.0834	0.1839	0.0472
S14	0.3901	-0.0194	0.2601	0.0039
S15	0.3593	-0.0387	0.2684	-0.0228
