# Supplementary material for: A generalized cortical activity pattern at internally generated mental context boundaries during unguided narrative recall
Source: eLife. 2022 May 30;11:e73693. doi: 10.7554/eLife.73693 (PMC9177147; doi:10.7554/eLife.73693)
Supplement: Figure 3—figure supplement 4—source data 1. [file elife-73693-fig3-figsupp4-data1.xlsx]

## Sheet: Figure3_supplement3A
0.095668	0.11086	0.052057	0.026829	0.001228	0.053025	0.021318	0.020136	-0.048264	-0.057944	-0.025091	0.05533	0.049218	0.065761	-0.0067965	-0.0044773	-0.10245	-0.17649	-0.22107	-0.27565	-0.28988	-0.32504	-0.37112	-0.37062	-0.38787	-0.36166	-0.33778	-0.31789	-0.32176	-0.2966	-0.27445	-0.24093	-0.21501	-0.2025	-0.16689	-0.12851	-0.083885	-0.086553	-0.13106	-0.19412	-0.13091	-0.11793	-0.046471	-0.073454	-0.083551	-0.061546	-0.022671	-0.003768	0.10409	0.11451
0.087455	0.042568	0.011366	-0.0075197	0.012532	0.030967	-0.020729	-0.039824	-0.065912	-0.090366	-0.05272	-0.010337	0.010864	-0.0032863	-0.041202	-0.0885	-0.13026	-0.12319	-0.14511	-0.17469	-0.22392	-0.24115	-0.24733	-0.2702	-0.27927	-0.2693	-0.23292	-0.23012	-0.23439	-0.20877	-0.1709	-0.15422	-0.079784	-0.11267	-0.057549	-0.044376	-0.048318	-0.033064	-0.11153	-0.11199	-0.052797	-0.052047	0.019512	-0.049713	-0.042089	-0.027837	0.037091	0.049012	0.05592	0.055761
0.017021	0.043791	-0.016799	-0.030395	-0.020885	0.0046857	-0.096327	-0.07706	-0.10817	-0.11745	-0.063277	-0.069899	-0.097639	-0.12195	-0.13874	-0.16246	-0.19321	-0.16572	-0.14051	-0.16186	-0.19136	-0.17829	-0.21763	-0.20204	-0.24201	-0.22756	-0.17596	-0.14498	-0.13109	-0.11867	-0.10851	-0.05834	-0.037781	-0.0035174	0.005091	0.019349	0.0035033	-0.057617	-0.064529	-0.11021	-0.045449	-0.0066497	0.076988	0.038809	-0.0022556	0.0013453	0.042295	0.051821	0.075049	0.076813
-0.0017672	0.024011	-0.0012029	-0.011282	-0.024227	-0.0040349	-0.028366	-0.10104	-0.13789	-0.14438	-0.17357	-0.10197	-0.11527	-0.12169	-0.12334	-0.19007	-0.22551	-0.20294	-0.26229	-0.25511	-0.26927	-0.28698	-0.30599	-0.29315	-0.30374	-0.28279	-0.23128	-0.18483	-0.17614	-0.15124	-0.10638	-0.091943	-0.034885	0.026601	0.01264	0.072515	-0.015405	-0.0081443	-0.07221	-0.11755	-0.047942	-0.034733	0.068697	0.048678	0.019204	0.013054	0.03093	0.10154	0.11519	0.15691
0.01791	0.020697	0.037385	-0.034605	-0.042758	0.034346	-0.0091513	-0.039116	-0.093786	-0.17194	-0.10161	-0.085086	-0.10034	-0.10718	-0.11227	-0.099535	-0.15893	-0.24462	-0.30108	-0.34413	-0.39256	-0.37024	-0.39352	-0.37206	-0.37456	-0.3621	-0.29822	-0.26627	-0.24154	-0.22128	-0.19395	-0.1017	-0.079185	-0.031716	0.0031825	0.0040513	0.053513	-0.033892	-0.10704	-0.090227	-0.061678	-0.01529	0.0058446	0.013749	0.0053656	-0.026988	0.012677	0.055735	0.10559	0.17911
-0.019407	-0.039009	0.0020339	-0.026189	-0.040373	-0.019439	-0.032085	-0.061447	-0.12792	-0.15453	-0.11786	-0.050239	-0.0665	-0.086853	-0.10234	-0.11075	-0.18226	-0.19334	-0.26527	-0.32814	-0.34456	-0.37356	-0.38106	-0.35006	-0.32714	-0.30681	-0.24833	-0.20207	-0.15712	-0.19178	-0.12228	-0.058825	-0.013254	0.011658	-0.018965	0.052939	0.01577	-0.033857	-0.073192	-0.096841	-0.054187	-0.027702	0.0081776	0.0052383	-0.029067	0.011286	0.0075854	0.065023	0.1256	0.20029
-0.06643	-0.053398	0.001214	-0.062999	-0.078084	-0.043045	-0.019844	-0.088903	-0.085394	-0.11799	-0.083906	-0.056749	-0.12026	-0.095798	-0.085116	-0.12206	-0.13755	-0.20743	-0.26606	-0.29612	-0.32748	-0.37809	-0.3598	-0.31699	-0.26628	-0.23445	-0.19135	-0.17385	-0.16747	-0.13616	-0.095659	-0.026846	0.025323	0.019084	0.013028	0.023924	0.067624	0.053868	0.0021613	-0.024211	-0.018761	-0.019691	-0.0022243	-0.0058836	-0.010602	0.0045981	0.051223	0.041715	0.11331	0.20937
-0.013878	-0.042887	0.018976	0.0060204	-0.055766	-0.026299	-0.06914	-0.074264	-0.082505	-0.097477	-0.080617	-0.072819	-0.16555	-0.11493	-0.15348	-0.14654	-0.15302	-0.13827	-0.19772	-0.26475	-0.27665	-0.29132	-0.27675	-0.22245	-0.18088	-0.15246	-0.13656	-0.092221	-0.050239	-0.078673	-0.051657	-0.021967	0.019304	0.10888	0.036126	0.07191	0.042911	0.067054	0.056911	0.034364	0.091699	0.025329	0.060869	-0.0053994	-0.059974	-0.012406	0.0059459	0.0019908	0.13599	0.22801
-0.0084497	-0.048697	-0.01746	-0.031564	-0.023323	-0.058243	-0.011487	-0.022879	-0.0054807	-0.070023	-0.06566	-0.094417	-0.11212	-0.088092	-0.076621	-0.12145	-0.078339	-0.081328	-0.13161	-0.19125	-0.25085	-0.28045	-0.2648	-0.22127	-0.19442	-0.19645	-0.16065	-0.099397	-0.10957	-0.086043	-0.07474	-0.028644	0.011559	0.051433	0.0297	0.024616	0.024424	0.096253	0.057787	0.06521	0.020974	0.011884	0.036659	0.0099633	0.0033962	0.002687	0.015143	-0.025084	0.14609	0.26258
0.060376	-0.06158	-0.034503	-0.087104	-0.099969	-0.062739	-0.031586	0.0079257	-0.031503	-0.069725	-0.15681	-0.10137	-0.1107	-0.061579	-0.088566	-0.087903	-0.093081	-0.10508	-0.12341	-0.17559	-0.23823	-0.26157	-0.24008	-0.21276	-0.18217	-0.21064	-0.16912	-0.10308	-0.082079	-0.078121	-0.050164	0.0047426	0.065178	0.080014	0.014825	0.014807	0.03161	0.091851	0.061973	0.029017	-0.0083241	0.013158	0.032897	0.064179	0.015161	0.074783	0.051683	-0.013877	0.14929	0.33157
0.011003	-0.073889	-0.06846	-0.13008	-0.10525	-0.10084	-0.072468	-0.04495	-0.086982	-0.11376	-0.12671	-0.077093	-0.076136	-0.092585	-0.12995	-0.14748	-0.12377	-0.10812	-0.12374	-0.1808	-0.19985	-0.23768	-0.23479	-0.1933	-0.17722	-0.18362	-0.1473	-0.079709	-0.095305	-0.036209	-0.028796	0.028282	0.06018	0.062398	0.042762	0.033848	0.03821	0.066455	0.051119	0.02554	0.0057842	-0.048544	-0.00079402	0.020195	0.0037767	0.05009	0.093645	0.066126	0.26119	0.4427
0.035389	-0.046052	-0.042495	-0.10591	-0.11607	-0.10559	-0.097676	-0.071475	-0.12955	-0.11072	-0.14004	-0.1124	-0.11282	-0.12199	-0.1112	-0.17959	-0.14323	-0.16047	-0.15818	-0.18568	-0.22422	-0.24481	-0.22212	-0.1606	-0.17158	-0.20123	-0.15473	-0.080651	-0.065253	-0.032967	-0.027999	0.013749	0.0031392	0.051043	0.034681	0.073321	0.039334	0.046999	-0.01757	-0.016823	-0.030001	-0.023219	0.0017654	0.041049	0.016621	0.076754	0.11833	0.20442	0.41365	1
-0.0032603	-0.039229	0.017025	-0.074644	-0.069979	-0.10231	-0.11276	-0.066359	-0.098363	-0.15418	-0.14745	-0.14444	-0.106	-0.15258	-0.16429	-0.18678	-0.17509	-0.17565	-0.15221	-0.164	-0.19805	-0.19808	-0.16496	-0.12111	-0.11447	-0.12576	-0.09946	-0.018419	0.0012986	-0.042695	-0.02215	-0.027978	-0.019602	0.039305	0.02918	0.079233	0.073847	0.08623	0.041527	-0.029794	0.011702	0.02376	0.059237	0.072182	0.11145	0.14734	0.23278	0.37405	1	0.41365
-0.079283	-0.10289	-0.081671	-0.10978	-0.13011	-0.14875	-0.15711	-0.12765	-0.16643	-0.22502	-0.19838	-0.19275	-0.11665	-0.18581	-0.12715	-0.15947	-0.13231	-0.12352	-0.12858	-0.070708	-0.045998	-0.053601	-0.025642	0.013187	0.028598	0.0048752	0.03414	0.086627	0.060745	0.07819	0.066194	0.070039	0.083596	0.10126	0.11272	0.17814	0.20433	0.17502	0.097233	0.02889	0.067507	0.066222	0.16682	0.19976	0.28836	0.40459	0.50195	1	0.37405	0.20442
-0.046474	-0.12148	-0.11184	-0.16985	-0.14464	-0.20662	-0.12958	-0.13641	-0.12952	-0.25024	-0.17084	-0.17838	-0.18402	-0.19429	-0.15074	-0.13327	-0.12146	-0.1341	-0.077666	-0.033724	-0.011634	-0.001356	0.00036709	0.033212	0.031216	0.027466	0.066945	0.088286	0.05651	0.056466	0.06938	0.12431	0.13536	0.1125	0.1194	0.16216	0.17815	0.179	0.13048	0.077411	0.054144	0.098814	0.17992	0.2474	0.35454	0.50543	1	0.50195	0.23278	0.11833
-0.10449	-0.11043	-0.15871	-0.16729	-0.18965	-0.22153	-0.17198	-0.14987	-0.17125	-0.21393	-0.21414	-0.23112	-0.20476	-0.19856	-0.11259	-0.11362	-0.12394	-0.12238	-0.096378	-0.0036725	0.041188	0.076983	0.079631	0.11866	0.14113	0.1143	0.14179	0.15355	0.1454	0.13206	0.17048	0.22072	0.20341	0.20514	0.1819	0.22708	0.22453	0.19695	0.18745	0.1937	0.179	0.17892	0.23384	0.39864	0.49112	1	0.50543	0.40459	0.14734	0.076754
-0.049422	-0.10051	-0.14057	-0.13399	-0.15852	-0.18635	-0.19623	-0.19453	-0.18377	-0.2316	-0.22356	-0.20131	-0.17244	-0.18043	-0.1862	-0.1548	-0.093219	-0.1109	-0.073152	0.046394	0.0823	0.11188	0.10337	0.15441	0.18349	0.16865	0.18665	0.20724	0.18912	0.21239	0.22662	0.2402	0.21308	0.19972	0.23249	0.21395	0.25533	0.23461	0.20549	0.23024	0.21037	0.26538	0.34016	0.51194	1	0.49112	0.35454	0.28836	0.11145	0.016621
-0.083297	-0.11392	-0.12205	-0.14771	-0.15205	-0.2238	-0.25299	-0.25096	-0.25478	-0.21681	-0.22885	-0.22035	-0.24015	-0.21072	-0.19161	-0.1762	-0.12409	-0.10327	-0.030084	0.043254	0.084484	0.12258	0.13988	0.20254	0.22984	0.21406	0.24791	0.26088	0.27868	0.32974	0.32012	0.32499	0.28793	0.2916	0.30183	0.29063	0.30092	0.26881	0.30184	0.29654	0.31762	0.42801	0.51835	1	0.51194	0.39864	0.2474	0.19976	0.072182	0.041049
-0.05484	-0.08277	-0.076945	-0.036709	-0.17659	-0.21373	-0.27743	-0.25712	-0.24252	-0.20206	-0.18938	-0.24552	-0.25935	-0.23558	-0.23739	-0.2161	-0.18113	-0.12452	-0.021434	0.017749	0.03482	0.095603	0.13617	0.17594	0.22523	0.2225	0.25281	0.28276	0.28555	0.31345	0.32251	0.34909	0.30743	0.30434	0.33541	0.35875	0.35558	0.3559	0.32412	0.35696	0.45341	0.57223	1	0.51835	0.34016	0.23384	0.17992	0.16682	0.059237	0.0017654
-0.094791	-0.084855	-0.041398	-0.0032607	-0.084038	-0.13501	-0.25072	-0.2577	-0.24705	-0.13421	-0.15517	-0.22446	-0.26258	-0.23653	-0.25747	-0.23231	-0.20378	-0.14184	-0.018122	0.007408	0.01568	0.1178	0.14869	0.18546	0.24198	0.26572	0.30327	0.31075	0.33212	0.35815	0.35641	0.35102	0.35225	0.30652	0.34806	0.36023	0.37539	0.35795	0.36283	0.47533	0.57934	1	0.57223	0.42801	0.26538	0.17892	0.098814	0.066222	0.02376	-0.023219
-0.11876	-0.083936	-0.052707	-0.024852	-0.13035	-0.16641	-0.23135	-0.26169	-0.19459	-0.084503	-0.10287	-0.17205	-0.21084	-0.24296	-0.20321	-0.18682	-0.20909	-0.069676	-0.045717	-0.010884	0.036716	0.13814	0.2004	0.22407	0.28705	0.30923	0.32573	0.34175	0.3417	0.37598	0.3617	0.32934	0.32184	0.32723	0.34905	0.38125	0.3371	0.35777	0.43351	0.57086	1	0.57934	0.45341	0.31762	0.21037	0.179	0.054144	0.067507	0.011702	-0.030001
-0.10925	-0.11017	-0.099485	-0.082097	-0.16058	-0.22278	-0.26435	-0.23334	-0.18116	-0.11	-0.10816	-0.18825	-0.26289	-0.21609	-0.19241	-0.17744	-0.11075	-0.12573	-0.046928	0.046069	0.066699	0.14241	0.18973	0.22273	0.28005	0.30582	0.31961	0.32508	0.32038	0.38306	0.37337	0.36159	0.36495	0.36317	0.40163	0.38912	0.41024	0.50622	0.58907	1	0.57086	0.47533	0.35696	0.29654	0.23024	0.1937	0.077411	0.02889	-0.029794	-0.016823
-0.12835	-0.11973	-0.12577	-0.16916	-0.19409	-0.28244	-0.23234	-0.20099	-0.17026	-0.14806	-0.19681	-0.20215	-0.27181	-0.23434	-0.21368	-0.18112	-0.15495	-0.099108	-0.043444	0.013378	0.016031	0.074733	0.12657	0.17188	0.23628	0.2529	0.26086	0.29765	0.29129	0.36318	0.36137	0.39158	0.38311	0.41124	0.36251	0.3685	0.4623	0.59015	1	0.58907	0.43351	0.36283	0.32412	0.30184	0.20549	0.18745	0.13048	0.097233	0.041527	-0.01757
-0.15051	-0.13687	-0.083596	-0.14202	-0.21444	-0.26851	-0.26165	-0.23981	-0.18574	-0.17237	-0.23505	-0.26827	-0.27371	-0.28298	-0.25524	-0.2614	-0.18147	-0.1618	-0.13146	-0.058384	-0.080348	-0.027581	0.039292	0.074512	0.17421	0.16658	0.19598	0.2225	0.21801	0.3175	0.3544	0.35948	0.3685	0.36361	0.37833	0.44809	0.57036	1	0.59015	0.50622	0.35777	0.35795	0.3559	0.26881	0.23461	0.19695	0.179	0.17502	0.08623	0.046999
-0.16206	-0.15266	-0.11065	-0.12141	-0.20052	-0.28129	-0.28821	-0.26177	-0.26845	-0.27457	-0.2472	-0.24452	-0.29349	-0.2975	-0.23989	-0.19596	-0.20748	-0.16285	-0.12409	-0.081617	-0.09359	-0.034758	0.016375	0.069881	0.1376	0.14995	0.18445	0.19661	0.22706	0.31103	0.36642	0.37889	0.37967	0.38611	0.4794	0.5677	1	0.57036	0.4623	0.41024	0.3371	0.37539	0.35558	0.30092	0.25533	0.22453	0.17815	0.20433	0.073847	0.039334
-0.1331	-0.14595	-0.11442	-0.082732	-0.19686	-0.26989	-0.28741	-0.31932	-0.29586	-0.26268	-0.25716	-0.25761	-0.29905	-0.28666	-0.20181	-0.25841	-0.2369	-0.12528	-0.090977	-0.052019	-0.035672	0.0032525	0.056541	0.11145	0.17439	0.18968	0.21598	0.26113	0.28601	0.32326	0.39309	0.34051	0.35748	0.44374	0.54922	1	0.5677	0.44809	0.3685	0.38912	0.38125	0.36023	0.35875	0.29063	0.21395	0.22708	0.16216	0.17814	0.079233	0.073321
-0.13072	-0.13566	-0.12673	-0.13041	-0.20033	-0.21922	-0.26553	-0.26074	-0.25927	-0.25499	-0.25999	-0.28899	-0.31116	-0.27899	-0.2367	-0.22823	-0.16341	-0.13141	-0.056973	-0.01565	0.00054806	0.048653	0.1053	0.15153	0.22519	0.22638	0.24548	0.29062	0.30098	0.35477	0.38486	0.40142	0.46047	0.53307	1	0.54922	0.4794	0.37833	0.36251	0.40163	0.34905	0.34806	0.33541	0.30183	0.23249	0.1819	0.1194	0.11272	0.02918	0.034681
-0.15529	-0.16689	-0.17576	-0.17371	-0.2506	-0.24368	-0.28185	-0.27571	-0.2476	-0.19782	-0.27541	-0.26631	-0.28018	-0.35118	-0.26808	-0.24852	-0.186	-0.090385	-0.023047	0.0072367	0.04494	0.053681	0.13034	0.20068	0.25974	0.26435	0.32883	0.3587	0.4052	0.39503	0.44093	0.52129	0.56363	1	0.53307	0.44374	0.38611	0.36361	0.41124	0.36317	0.32723	0.30652	0.30434	0.2916	0.19972	0.20514	0.1125	0.10126	0.039305	0.051043
-0.17295	-0.22196	-0.19106	-0.20108	-0.26415	-0.24698	-0.24333	-0.26584	-0.24761	-0.20552	-0.25961	-0.25484	-0.30023	-0.34864	-0.29613	-0.25211	-0.17153	-0.073349	-0.018428	0.082788	0.091658	0.13135	0.19625	0.23997	0.29689	0.35883	0.39327	0.39961	0.38146	0.38325	0.52988	0.65196	1	0.56363	0.46047	0.35748	0.37967	0.3685	0.38311	0.36495	0.32184	0.35225	0.30743	0.28793	0.21308	0.20341	0.13536	0.083596	-0.019602	0.0031392
-0.18509	-0.2095	-0.17727	-0.21494	-0.27422	-0.29233	-0.28074	-0.24562	-0.25059	-0.16952	-0.21911	-0.24273	-0.28162	-0.31328	-0.28468	-0.20085	-0.1184	-0.065583	0.061941	0.11738	0.13704	0.18399	0.23196	0.2777	0.35564	0.38326	0.40466	0.396	0.41792	0.47812	0.60834	1	0.65196	0.52129	0.40142	0.34051	0.37889	0.35948	0.39158	0.36159	0.32934	0.35102	0.34909	0.32499	0.2402	0.22072	0.12431	0.070039	-0.027978	0.013749
-0.1981	-0.19029	-0.17885	-0.17195	-0.23853	-0.27074	-0.2939	-0.26488	-0.24834	-0.15464	-0.17251	-0.21655	-0.27384	-0.26725	-0.25359	-0.171	-0.090676	0.0068418	0.058778	0.18495	0.21921	0.28307	0.3322	0.4029	0.44591	0.47816	0.46875	0.4805	0.56129	0.61218	1	0.60834	0.52988	0.44093	0.38486	0.39309	0.36642	0.3544	0.36137	0.37337	0.3617	0.35641	0.32251	0.32012	0.22662	0.17048	0.06938	0.066194	-0.02215	-0.027999
-0.18436	-0.21059	-0.18922	-0.17134	-0.20274	-0.22299	-0.28424	-0.24842	-0.19429	-0.098929	-0.11618	-0.21744	-0.2167	-0.20839	-0.17279	-0.13198	-0.036052	0.02365	0.17534	0.27275	0.32971	0.38077	0.45722	0.51573	0.5529	0.54066	0.55064	0.62082	0.65416	1	0.61218	0.47812	0.38325	0.39503	0.35477	0.32326	0.31103	0.3175	0.36318	0.38306	0.37598	0.35815	0.31345	0.32974	0.21239	0.13206	0.056466	0.07819	-0.042695	-0.032967
-0.14646	-0.15132	-0.14622	-0.14478	-0.1702	-0.19895	-0.26894	-0.24748	-0.19786	-0.073665	-0.11474	-0.1748	-0.19671	-0.21803	-0.19718	-0.14129	-0.021588	0.07284	0.21752	0.31665	0.38215	0.44861	0.52193	0.55952	0.57387	0.60843	0.64449	0.71676	1	0.65416	0.56129	0.41792	0.38146	0.4052	0.30098	0.28601	0.22706	0.21801	0.29129	0.32038	0.3417	0.33212	0.28555	0.27868	0.18912	0.1454	0.05651	0.060745	0.0012986	-0.065253
-0.16561	-0.17887	-0.17846	-0.18013	-0.19781	-0.20896	-0.25636	-0.21587	-0.16625	-0.10191	-0.13086	-0.17269	-0.18743	-0.22254	-0.21515	-0.15681	-0.010833	0.085687	0.23372	0.34056	0.43041	0.50404	0.57561	0.60978	0.64598	0.70362	0.74806	1	0.71676	0.62082	0.4805	0.396	0.39961	0.3587	0.29062	0.26113	0.19661	0.2225	0.29765	0.32508	0.34175	0.31075	0.28276	0.26088	0.20724	0.15355	0.088286	0.086627	-0.018419	-0.080651
-0.20885	-0.18165	-0.18925	-0.1755	-0.21447	-0.20273	-0.25638	-0.19984	-0.15663	-0.035587	-0.064475	-0.11919	-0.14153	-0.19736	-0.17013	-0.10373	0.035201	0.15907	0.28428	0.41232	0.50974	0.58843	0.63616	0.66462	0.73121	0.79218	1	0.74806	0.64449	0.55064	0.46875	0.40466	0.39327	0.32883	0.24548	0.21598	0.18445	0.19598	0.26086	0.31961	0.32573	0.30327	0.25281	0.24791	0.18665	0.14179	0.066945	0.03414	-0.09946	-0.15473
-0.21805	-0.17436	-0.19603	-0.15018	-0.21724	-0.20668	-0.23668	-0.21282	-0.13236	-0.032807	-0.034511	-0.10325	-0.13077	-0.16345	-0.15845	-0.035959	0.092929	0.19927	0.32494	0.48087	0.55481	0.64106	0.68028	0.73847	0.80069	1	0.79218	0.70362	0.60843	0.54066	0.47816	0.38326	0.35883	0.26435	0.22638	0.18968	0.14995	0.16658	0.2529	0.30582	0.30923	0.26572	0.2225	0.21406	0.16865	0.1143	0.027466	0.0048752	-0.12576	-0.20123
-0.22878	-0.20508	-0.21441	-0.16769	-0.22541	-0.19491	-0.25831	-0.2051	-0.13588	-0.020132	-0.035946	-0.099515	-0.11707	-0.13555	-0.11177	-0.031265	0.099286	0.20749	0.3641	0.50611	0.58866	0.67311	0.7471	0.79901	1	0.80069	0.73121	0.64598	0.57387	0.5529	0.44591	0.35564	0.29689	0.25974	0.22519	0.17439	0.1376	0.17421	0.23628	0.28005	0.28705	0.24198	0.22523	0.22984	0.18349	0.14113	0.031216	0.028598	-0.11447	-0.17158
-0.19615	-0.19232	-0.20991	-0.16495	-0.17673	-0.16504	-0.20777	-0.16673	-0.093828	-0.0018474	0.001754	-0.074808	-0.09527	-0.1055	-0.07163	-0.0070375	0.11789	0.25032	0.43027	0.5475	0.65196	0.76069	0.83149	1	0.79901	0.73847	0.66462	0.60978	0.55952	0.51573	0.4029	0.2777	0.23997	0.20068	0.15153	0.11145	0.069881	0.074512	0.17188	0.22273	0.22407	0.18546	0.17594	0.20254	0.15441	0.11866	0.033212	0.013187	-0.12111	-0.1606
-0.17324	-0.19111	-0.19882	-0.12132	-0.1364	-0.12925	-0.15489	-0.11368	-0.0075803	0.057784	0.053818	-0.016751	-0.034183	-0.042149	-0.0047516	0.077756	0.17504	0.2969	0.4666	0.59599	0.73453	0.82395	1	0.83149	0.7471	0.68028	0.63616	0.57561	0.52193	0.45722	0.3322	0.23196	0.19625	0.13034	0.1053	0.056541	0.016375	0.039292	0.12657	0.18973	0.2004	0.14869	0.13617	0.13988	0.10337	0.079631	0.00036709	-0.025642	-0.16496	-0.22212
-0.15957	-0.16925	-0.17938	-0.088798	-0.11185	-0.097595	-0.1146	-0.071823	0.019484	0.066442	0.069224	0.02132	0.0056138	-0.013354	0.0046858	0.091323	0.19929	0.34965	0.48783	0.64605	0.78053	1	0.82395	0.76069	0.67311	0.64106	0.58843	0.50404	0.44861	0.38077	0.28307	0.18399	0.13135	0.053681	0.048653	0.0032525	-0.034758	-0.027581	0.074733	0.14241	0.13814	0.1178	0.095603	0.12258	0.11188	0.076983	-0.001356	-0.053601	-0.19808	-0.24481
-0.1469	-0.14458	-0.20014	-0.12733	-0.0706	-0.061455	-0.061224	-0.020812	0.043517	0.074829	0.067021	0.023794	0.018077	0.0048491	0.021222	0.13114	0.22003	0.36818	0.5385	0.71828	1	0.78053	0.73453	0.65196	0.58866	0.55481	0.50974	0.43041	0.38215	0.32971	0.21921	0.13704	0.091658	0.04494	0.00054806	-0.035672	-0.09359	-0.080348	0.016031	0.066699	0.036716	0.01568	0.03482	0.084484	0.0823	0.041188	-0.011634	-0.045998	-0.19805	-0.22422
-0.084455	-0.11551	-0.18622	-0.12569	-0.07837	-0.093785	-0.053433	0.020616	0.065026	0.072354	0.08058	0.022536	0.0448	0.038955	0.045082	0.11931	0.25251	0.39651	0.59836	1	0.71828	0.64605	0.59599	0.5475	0.50611	0.48087	0.41232	0.34056	0.31665	0.27275	0.18495	0.11738	0.082788	0.0072367	-0.01565	-0.052019	-0.081617	-0.058384	0.013378	0.046069	-0.010884	0.007408	0.017749	0.043254	0.046394	-0.0036725	-0.033724	-0.070708	-0.164	-0.18568
-0.025578	-0.089893	-0.13316	-0.083201	-0.05128	-0.026289	-0.003535	0.059096	0.06771	0.088851	0.12576	0.058644	0.080961	0.12747	0.12126	0.20442	0.34312	0.46201	1	0.59836	0.5385	0.48783	0.4666	0.43027	0.3641	0.32494	0.28428	0.23372	0.21752	0.17534	0.058778	0.061941	-0.018428	-0.023047	-0.056973	-0.090977	-0.12409	-0.13146	-0.043444	-0.046928	-0.045717	-0.018122	-0.021434	-0.030084	-0.073152	-0.096378	-0.077666	-0.12858	-0.15221	-0.15818
0.0076577	0.005996	-0.091776	0.0073749	-0.037548	0.026986	0.06127	0.086164	0.11409	0.16151	0.12417	0.15277	0.15617	0.17144	0.21354	0.31017	0.44626	1	0.46201	0.39651	0.36818	0.34965	0.2969	0.25032	0.20749	0.19927	0.15907	0.085687	0.07284	0.02365	0.0068418	-0.065583	-0.073349	-0.090385	-0.13141	-0.12528	-0.16285	-0.1618	-0.099108	-0.12573	-0.069676	-0.14184	-0.12452	-0.10327	-0.1109	-0.12238	-0.1341	-0.12352	-0.17565	-0.16047
0.026275	0.004791	-0.043932	-0.019642	-0.011505	0.079403	0.15176	0.18885	0.16928	0.14653	0.16013	0.16859	0.18542	0.22572	0.34006	0.44307	1	0.44626	0.34312	0.25251	0.22003	0.19929	0.17504	0.11789	0.099286	0.092929	0.035201	-0.010833	-0.021588	-0.036052	-0.090676	-0.1184	-0.17153	-0.186	-0.16341	-0.2369	-0.20748	-0.18147	-0.15495	-0.11075	-0.20909	-0.20378	-0.18113	-0.12409	-0.093219	-0.12394	-0.12146	-0.13231	-0.17509	-0.14323
0.038511	0.039985	-0.017201	0.016524	0.037519	0.12863	0.23283	0.23791	0.21729	0.17193	0.22967	0.1933	0.24928	0.3488	0.4595	1	0.44307	0.31017	0.20442	0.11931	0.13114	0.091323	0.077756	-0.0070375	-0.031265	-0.035959	-0.10373	-0.15681	-0.14129	-0.13198	-0.171	-0.20085	-0.25211	-0.24852	-0.22823	-0.25841	-0.19596	-0.2614	-0.18112	-0.17744	-0.18682	-0.23231	-0.2161	-0.1762	-0.1548	-0.11362	-0.13327	-0.15947	-0.18678	-0.17959
0.10303	0.090595	0.031609	0.068057	0.14984	0.18181	0.2652	0.24453	0.21602	0.19033	0.21388	0.24456	0.358	0.47917	1	0.4595	0.34006	0.21354	0.12126	0.045082	0.021222	0.0046858	-0.0047516	-0.07163	-0.11177	-0.15845	-0.17013	-0.21515	-0.19718	-0.17279	-0.25359	-0.28468	-0.29613	-0.26808	-0.2367	-0.20181	-0.23989	-0.25524	-0.21368	-0.19241	-0.20321	-0.25747	-0.23739	-0.19161	-0.1862	-0.11259	-0.15074	-0.12715	-0.16429	-0.1112
0.095734	0.082457	0.083829	0.11768	0.14913	0.23831	0.24056	0.24938	0.23743	0.19478	0.26365	0.3519	0.43302	1	0.47917	0.3488	0.22572	0.17144	0.12747	0.038955	0.0048491	-0.013354	-0.042149	-0.1055	-0.13555	-0.16345	-0.19736	-0.22254	-0.21803	-0.20839	-0.26725	-0.31328	-0.34864	-0.35118	-0.27899	-0.28666	-0.2975	-0.28298	-0.23434	-0.21609	-0.24296	-0.23653	-0.23558	-0.21072	-0.18043	-0.19856	-0.19429	-0.18581	-0.15258	-0.12199
0.069594	0.1107	0.099194	0.13817	0.18164	0.22395	0.19941	0.20926	0.21344	0.1846	0.30064	0.45379	1	0.43302	0.358	0.24928	0.18542	0.15617	0.080961	0.0448	0.018077	0.0056138	-0.034183	-0.09527	-0.11707	-0.13077	-0.14153	-0.18743	-0.19671	-0.2167	-0.27384	-0.28162	-0.30023	-0.28018	-0.31116	-0.29905	-0.29349	-0.27371	-0.27181	-0.26289	-0.21084	-0.26258	-0.25935	-0.24015	-0.17244	-0.20476	-0.18402	-0.11665	-0.106	-0.11282
0.077866	0.10732	0.12753	0.15661	0.21229	0.19686	0.19547	0.16773	0.20478	0.29489	0.45931	1	0.45379	0.3519	0.24456	0.1933	0.16859	0.15277	0.058644	0.022536	0.023794	0.02132	-0.016751	-0.074808	-0.099515	-0.10325	-0.11919	-0.17269	-0.1748	-0.21744	-0.21655	-0.24273	-0.25484	-0.26631	-0.28899	-0.25761	-0.24452	-0.26827	-0.20215	-0.18825	-0.17205	-0.22446	-0.24552	-0.22035	-0.20131	-0.23112	-0.17838	-0.19275	-0.14444	-0.1124
0.027642	0.027242	0.056743	0.14913	0.17754	0.15054	0.18881	0.14555	0.30402	0.39772	1	0.45931	0.30064	0.26365	0.21388	0.22967	0.16013	0.12417	0.12576	0.08058	0.067021	0.069224	0.053818	0.001754	-0.035946	-0.034511	-0.064475	-0.13086	-0.11474	-0.11618	-0.17251	-0.21911	-0.25961	-0.27541	-0.25999	-0.25716	-0.2472	-0.23505	-0.19681	-0.10816	-0.10287	-0.15517	-0.18938	-0.22885	-0.22356	-0.21414	-0.17084	-0.19838	-0.14745	-0.14004
0.060333	0.063735	0.076449	0.1309	0.20112	0.23734	0.21735	0.22256	0.365	1	0.39772	0.29489	0.1846	0.19478	0.19033	0.17193	0.14653	0.16151	0.088851	0.072354	0.074829	0.066442	0.057784	-0.0018474	-0.020132	-0.032807	-0.035587	-0.10191	-0.073665	-0.098929	-0.15464	-0.16952	-0.20552	-0.19782	-0.25499	-0.26268	-0.27457	-0.17237	-0.14806	-0.11	-0.084503	-0.13421	-0.20206	-0.21681	-0.2316	-0.21393	-0.25024	-0.22502	-0.15418	-0.11072
0.068522	0.077254	0.08375	0.108	0.192	0.18158	0.3445	0.42606	1	0.365	0.30402	0.20478	0.21344	0.23743	0.21602	0.21729	0.16928	0.11409	0.06771	0.065026	0.043517	0.019484	-0.0075803	-0.093828	-0.13588	-0.13236	-0.15663	-0.16625	-0.19786	-0.19429	-0.24834	-0.25059	-0.24761	-0.2476	-0.25927	-0.29586	-0.26845	-0.18574	-0.17026	-0.18116	-0.19459	-0.24705	-0.24252	-0.25478	-0.18377	-0.17125	-0.12952	-0.16643	-0.098363	-0.12955
0.1169	0.13775	0.1101	0.091667	0.19905	0.30651	0.40006	1	0.42606	0.22256	0.14555	0.16773	0.20926	0.24938	0.24453	0.23791	0.18885	0.086164	0.059096	0.020616	-0.020812	-0.071823	-0.11368	-0.16673	-0.2051	-0.21282	-0.19984	-0.21587	-0.24748	-0.24842	-0.26488	-0.24562	-0.26584	-0.27571	-0.26074	-0.31932	-0.26177	-0.23981	-0.20099	-0.23334	-0.26169	-0.2577	-0.25712	-0.25096	-0.19453	-0.14987	-0.13641	-0.12765	-0.066359	-0.071475
0.10944	0.11983	0.10811	0.097565	0.26287	0.38978	1	0.40006	0.3445	0.21735	0.18881	0.19547	0.19941	0.24056	0.2652	0.23283	0.15176	0.06127	-0.003535	-0.053433	-0.061224	-0.1146	-0.15489	-0.20777	-0.25831	-0.23668	-0.25638	-0.25636	-0.26894	-0.28424	-0.2939	-0.28074	-0.24333	-0.28185	-0.26553	-0.28741	-0.28821	-0.26165	-0.23234	-0.26435	-0.23135	-0.25072	-0.27743	-0.25299	-0.19623	-0.17198	-0.12958	-0.15711	-0.11276	-0.097676
0.041152	0.11658	0.12812	0.23334	0.35722	1	0.38978	0.30651	0.18158	0.23734	0.15054	0.19686	0.22395	0.23831	0.18181	0.12863	0.079403	0.026986	-0.026289	-0.093785	-0.061455	-0.097595	-0.12925	-0.16504	-0.19491	-0.20668	-0.20273	-0.20896	-0.19895	-0.22299	-0.27074	-0.29233	-0.24698	-0.24368	-0.21922	-0.26989	-0.28129	-0.26851	-0.28244	-0.22278	-0.16641	-0.13501	-0.21373	-0.2238	-0.18635	-0.22153	-0.20662	-0.14875	-0.10231	-0.10559
0.10171	0.20235	0.31554	0.37649	1	0.35722	0.26287	0.19905	0.192	0.20112	0.17754	0.21229	0.18164	0.14913	0.14984	0.037519	-0.011505	-0.037548	-0.05128	-0.07837	-0.0706	-0.11185	-0.1364	-0.17673	-0.22541	-0.21724	-0.21447	-0.19781	-0.1702	-0.20274	-0.23853	-0.27422	-0.26415	-0.2506	-0.20033	-0.19686	-0.20052	-0.21444	-0.19409	-0.16058	-0.13035	-0.084038	-0.17659	-0.15205	-0.15852	-0.18965	-0.14464	-0.13011	-0.069979	-0.11607
0.12078	0.25948	0.39187	1	0.37649	0.23334	0.097565	0.091667	0.108	0.1309	0.14913	0.15661	0.13817	0.11768	0.068057	0.016524	-0.019642	0.0073749	-0.083201	-0.12569	-0.12733	-0.088798	-0.12132	-0.16495	-0.16769	-0.15018	-0.1755	-0.18013	-0.14478	-0.17134	-0.17195	-0.21494	-0.20108	-0.17371	-0.13041	-0.082732	-0.12141	-0.14202	-0.16916	-0.082097	-0.024852	-0.0032607	-0.036709	-0.14771	-0.13399	-0.16729	-0.16985	-0.10978	-0.074644	-0.10591
0.25927	0.36813	1	0.39187	0.31554	0.12812	0.10811	0.1101	0.08375	0.076449	0.056743	0.12753	0.099194	0.083829	0.031609	-0.017201	-0.043932	-0.091776	-0.13316	-0.18622	-0.20014	-0.17938	-0.19882	-0.20991	-0.21441	-0.19603	-0.18925	-0.17846	-0.14622	-0.18922	-0.17885	-0.17727	-0.19106	-0.17576	-0.12673	-0.11442	-0.11065	-0.083596	-0.12577	-0.099485	-0.052707	-0.041398	-0.076945	-0.12205	-0.14057	-0.15871	-0.11184	-0.081671	0.017025	-0.042495
0.38814	1	0.36813	0.25948	0.20235	0.11658	0.11983	0.13775	0.077254	0.063735	0.027242	0.10732	0.1107	0.082457	0.090595	0.039985	0.004791	0.005996	-0.089893	-0.11551	-0.14458	-0.16925	-0.19111	-0.19232	-0.20508	-0.17436	-0.18165	-0.17887	-0.15132	-0.21059	-0.19029	-0.2095	-0.22196	-0.16689	-0.13566	-0.14595	-0.15266	-0.13687	-0.11973	-0.11017	-0.083936	-0.084855	-0.08277	-0.11392	-0.10051	-0.11043	-0.12148	-0.10289	-0.039229	-0.046052
1	0.38814	0.25927	0.12078	0.10171	0.041152	0.10944	0.1169	0.068522	0.060333	0.027642	0.077866	0.069594	0.095734	0.10303	0.038511	0.026275	0.0076577	-0.025578	-0.084455	-0.1469	-0.15957	-0.17324	-0.19615	-0.22878	-0.21805	-0.20885	-0.16561	-0.14646	-0.18436	-0.1981	-0.18509	-0.17295	-0.15529	-0.13072	-0.1331	-0.16206	-0.15051	-0.12835	-0.10925	-0.11876	-0.094791	-0.05484	-0.083297	-0.049422	-0.10449	-0.046474	-0.079283	-0.0032603	0.035389
[truncated: 11 more columns]

## Sheet: Figure3_supplement3B
0.10324	0.068187	0.058186	0.053266	-0.033293	-0.094273	-0.087029	-0.054004	-0.08392	-0.062563	-0.014449	0.012534	-0.058115	-0.12992	-0.071592	-0.022765	-0.082851	-0.13961	-0.17042	-0.11588	-0.094257	-0.11713	-0.17597	-0.23443	-0.33108	-0.36158	-0.36682	-0.36219	-0.33145	-0.32883	-0.29038	-0.26043	-0.21481	-0.17632	-0.15958	-0.12876	-0.094216	-0.042981	-0.040928	-0.020804	-0.034749	-0.071822	-0.028669	-0.052042	-0.041699	-0.044008	-0.04145	-0.031909	0.0021678	0.075651
0.093283	0.049253	0.082696	0.055534	-0.023257	-0.06248	-0.11658	-0.064262	-0.012582	-0.041949	-0.031318	-0.037307	-0.08321	-0.16437	-0.041664	-0.062992	-0.13325	-0.20277	-0.20137	-0.12411	-0.097509	-0.14104	-0.20267	-0.26547	-0.36394	-0.3768	-0.39609	-0.37786	-0.31675	-0.31476	-0.2821	-0.24379	-0.21847	-0.1826	-0.187	-0.13576	-0.097632	-0.050004	-0.017812	-0.016997	-0.035455	-0.027736	-0.018416	-0.017984	-0.067363	-0.045441	-0.083828	-0.068626	-0.090494	0.00047401
0.11531	0.00673	0.062077	0.082303	0.0059804	-0.095664	-0.11844	-0.065228	0.012835	-0.038016	0.023156	0.0068283	-0.077118	-0.13507	-0.080577	-0.053049	-0.10245	-0.18486	-0.11695	-0.10221	-0.068636	-0.12995	-0.1947	-0.23077	-0.32318	-0.33928	-0.34432	-0.35286	-0.2916	-0.28531	-0.25474	-0.20941	-0.17468	-0.14613	-0.15365	-0.11254	-0.11044	-0.090187	-0.058414	-0.025145	-0.01976	-0.001219	0.0016304	-0.019786	-0.017674	-0.070523	-0.057585	-0.072975	-0.07844	-0.00030784
0.081445	0.038842	0.061904	0.078676	-0.022602	-0.065419	-0.10575	-0.02352	0.0093158	-0.043266	-0.013184	-0.09079	-0.078455	-0.13571	-0.09338	-0.078445	-0.15288	-0.17425	-0.14887	-0.081367	-0.062409	-0.10509	-0.18995	-0.26568	-0.27694	-0.30937	-0.29811	-0.30652	-0.2455	-0.21153	-0.21344	-0.15862	-0.16988	-0.15386	-0.14443	-0.092926	-0.10917	-0.07097	-0.073364	-0.039584	-0.0042945	0.040839	0.03126	-0.0098794	-0.07217	-0.061607	-0.075346	-0.076351	-0.058146	-0.020668
0.088603	0.060768	0.080185	0.040316	-0.0401	-0.032359	-0.06677	-0.068448	-0.089728	-0.11613	-0.076465	-0.066169	-0.07167	-0.13442	-0.10902	-0.1482	-0.16407	-0.16312	-0.077101	-0.086146	-0.068397	-0.10165	-0.11917	-0.163	-0.17817	-0.20873	-0.2108	-0.18871	-0.16235	-0.15011	-0.14833	-0.085794	-0.090375	-0.091185	-0.063045	-0.078258	-0.047204	-0.013574	0.031881	-0.011184	-0.0015871	0.046025	0.0097835	0.0075364	-0.037138	-0.025823	-0.01992	-0.0030424	0.040908	0.072442
0.035709	0.035921	0.053585	0.018692	-0.073661	-0.087821	-0.16147	-0.11909	-0.14632	-0.13204	-0.099339	-0.096429	-0.10985	-0.12986	-0.08966	-0.08918	-0.10924	-0.116	-0.1162	-0.10228	-0.089162	-0.094838	-0.12151	-0.12545	-0.1343	-0.15513	-0.15166	-0.14434	-0.11306	-0.087745	-0.071369	-0.016189	-0.030163	-0.024041	-0.013836	-0.01043	0.0035466	0.045344	0.078685	0.052941	0.045921	0.05326	0.01805	0.038314	-0.019565	0.016831	-0.00039415	0.022623	0.078812	0.073226
0.064851	0.042332	0.055175	-0.038436	-0.13641	-0.11506	-0.16169	-0.085121	-0.11044	-0.09401	-0.1282	-0.10771	-0.11464	-0.14935	-0.097693	-0.1107	-0.10391	-0.13173	-0.088231	-0.093095	-0.11094	-0.10631	-0.13708	-0.10555	-0.085437	-0.093406	-0.12413	-0.10143	-0.060819	-0.039654	-0.013679	0.013367	0.033942	0.0075563	0.011913	0.014474	0.026349	0.055596	0.10287	0.069689	0.053671	0.052207	0.012057	0.045036	0.014453	0.035219	0.022999	0.067928	0.13056	0.10694
0.018291	0.014076	0.032747	-0.037949	-0.075235	-0.085286	-0.17139	-0.13458	-0.16504	-0.14792	-0.095054	-0.11682	-0.12375	-0.17284	-0.13465	-0.16836	-0.14805	-0.14132	-0.10233	-0.10627	-0.12517	-0.14648	-0.15442	-0.1386	-0.13024	-0.10675	-0.10099	-0.070821	-0.048567	-0.027328	-0.01497	0.029443	0.035411	0.037778	0.05267	0.022215	0.05564	0.094467	0.097196	0.11733	0.13574	0.12675	0.070123	0.072817	0.054936	0.064838	0.077374	0.12545	0.15083	0.17388
0.10007	0.015163	0.013128	-0.079887	-0.13981	-0.16343	-0.17795	-0.14923	-0.11166	-0.14546	-0.14121	-0.11084	-0.1158	-0.17517	-0.14886	-0.14227	-0.12038	-0.13499	-0.12025	-0.14815	-0.15485	-0.14604	-0.19479	-0.18212	-0.14244	-0.1292	-0.10859	-0.090763	-0.032763	-0.043739	-0.0070627	0.060934	0.04605	0.043574	0.022471	0.0066629	0.077319	0.087467	0.12648	0.16568	0.16315	0.16663	0.13443	0.12427	0.090336	0.14131	0.1359	0.17023	0.17602	0.20696
0.095527	0.054644	0.015634	-0.072637	-0.083202	-0.1211	-0.14157	-0.11042	-0.11137	-0.13263	-0.11453	-0.14534	-0.12977	-0.15766	-0.16268	-0.1912	-0.10955	-0.16196	-0.11294	-0.12056	-0.092461	-0.13697	-0.20241	-0.1252	-0.098186	-0.092978	-0.088513	-0.057572	-0.014378	-0.035009	0.0109	0.041682	0.012897	0.020316	0.0047557	-0.0036324	0.039535	0.092296	0.1132	0.13442	0.1481	0.12415	0.15018	0.10164	0.099554	0.13163	0.123	0.17893	0.25455	0.34022
0.13018	0.10071	0.0079175	-0.077427	-0.069206	-0.10957	-0.099378	-0.11391	-0.13381	-0.17468	-0.18834	-0.19463	-0.14952	-0.14462	-0.15212	-0.17794	-0.1928	-0.23147	-0.24712	-0.2197	-0.18623	-0.22294	-0.2374	-0.14813	-0.075138	-0.056974	-0.012678	-0.00034725	0.044681	0.04606	0.070542	0.11318	0.088225	0.070062	0.077304	0.047289	0.13129	0.20106	0.2207	0.22119	0.19566	0.1613	0.17118	0.20096	0.16698	0.19798	0.18973	0.26978	0.39139	0.50659
0.10327	0.057169	-0.065116	-0.10495	-0.086147	-0.041259	-0.073766	-0.15785	-0.17546	-0.17463	-0.20978	-0.19688	-0.15956	-0.14573	-0.18813	-0.2469	-0.24207	-0.28155	-0.2305	-0.21715	-0.2281	-0.192	-0.16543	-0.059771	0.025104	0.06822	0.10478	0.1387	0.18135	0.19864	0.20953	0.21337	0.191	0.18918	0.20725	0.22851	0.22711	0.25839	0.25393	0.20208	0.22426	0.20585	0.24671	0.30361	0.3149	0.32221	0.30202	0.43741	0.54866	1
0.030098	0.0052296	-0.12871	-0.16074	-0.10493	-0.045972	-0.059818	-0.16856	-0.20459	-0.19395	-0.2644	-0.22292	-0.15726	-0.14867	-0.19474	-0.24339	-0.20727	-0.20545	-0.20892	-0.23538	-0.23646	-0.17278	-0.11783	0.013643	0.14755	0.18113	0.2124	0.25357	0.28843	0.3045	0.29631	0.30326	0.32592	0.28864	0.31127	0.35229	0.35506	0.35137	0.3217	0.28721	0.31917	0.33717	0.33325	0.41313	0.39526	0.42521	0.46348	0.61613	1	0.54866
-0.011693	-0.035548	-0.099853	-0.18222	-0.13752	-0.077014	-0.11712	-0.13498	-0.21388	-0.22787	-0.27322	-0.24901	-0.18002	-0.16009	-0.20183	-0.24533	-0.21847	-0.2306	-0.24538	-0.28154	-0.30423	-0.23672	-0.10468	0.05926	0.16409	0.18616	0.26385	0.28358	0.32808	0.34508	0.36857	0.35796	0.36954	0.36181	0.38733	0.44914	0.41275	0.4142	0.35835	0.36113	0.37696	0.37351	0.40953	0.46262	0.50055	0.55178	0.63856	1	0.61613	0.43741
0.011716	-6.898e-05	-0.085705	-0.17392	-0.12363	-0.10259	-0.084403	-0.085167	-0.14133	-0.142	-0.21674	-0.22354	-0.18952	-0.19399	-0.19514	-0.2417	-0.26468	-0.2222	-0.23692	-0.29178	-0.29213	-0.22346	-0.11356	0.063694	0.12612	0.16088	0.24548	0.25494	0.32334	0.3369	0.37323	0.36699	0.37639	0.3631	0.38166	0.45249	0.44337	0.42747	0.33678	0.40535	0.41202	0.40681	0.39786	0.4659	0.55404	0.62715	1	0.63856	0.46348	0.30202
-0.042608	-0.044571	-0.12893	-0.15455	-0.12058	-0.0911	-0.10519	-0.14408	-0.1653	-0.15116	-0.18922	-0.19951	-0.19101	-0.17901	-0.16961	-0.20964	-0.24105	-0.22513	-0.25462	-0.26867	-0.31703	-0.26217	-0.15465	-0.020944	0.087696	0.13182	0.23089	0.27775	0.36563	0.37741	0.40468	0.40614	0.38917	0.3644	0.42616	0.45959	0.40761	0.395	0.40198	0.3948	0.40721	0.40925	0.39646	0.53105	0.64672	1	0.62715	0.55178	0.42521	0.32221
-0.076711	-0.07442	-0.098154	-0.14896	-0.0832	-0.091705	-0.095441	-0.14952	-0.14506	-0.14635	-0.20696	-0.22371	-0.14852	-0.12217	-0.14122	-0.19181	-0.24291	-0.21489	-0.23701	-0.27803	-0.33676	-0.23398	-0.12352	-0.0026956	0.085879	0.12125	0.22533	0.26255	0.33018	0.3416	0.39166	0.38549	0.40469	0.37165	0.42063	0.4618	0.41238	0.41372	0.39641	0.38552	0.37816	0.4112	0.51108	0.61578	1	0.64672	0.55404	0.50055	0.39526	0.3149
-0.041152	-0.04755	-0.10277	-0.17429	-0.11038	-0.06309	-0.12225	-0.16733	-0.1806	-0.17614	-0.25122	-0.23799	-0.19524	-0.13141	-0.15143	-0.21228	-0.24966	-0.21359	-0.3124	-0.30053	-0.27858	-0.18489	-0.11947	-0.016121	0.088098	0.12733	0.21136	0.23862	0.31485	0.35443	0.37661	0.40074	0.37619	0.37492	0.40141	0.43518	0.43283	0.42595	0.4335	0.38806	0.42169	0.48708	0.60008	1	0.61578	0.53105	0.4659	0.46262	0.41313	0.30361
-0.07275	-0.068494	-0.11673	-0.16122	-0.13068	-0.10876	-0.15538	-0.16557	-0.12553	-0.21082	-0.24397	-0.25432	-0.16785	-0.13145	-0.18742	-0.22116	-0.2528	-0.23781	-0.2842	-0.27224	-0.28193	-0.21882	-0.18542	-0.063743	0.015978	0.035556	0.13424	0.18521	0.25318	0.26432	0.29495	0.32412	0.32549	0.30672	0.3218	0.38408	0.4143	0.43538	0.4404	0.44572	0.50735	0.62338	1	0.60008	0.51108	0.39646	0.39786	0.40953	0.33325	0.24671
-0.093169	-0.11302	-0.1127	-0.12974	-0.12673	-0.098668	-0.18141	-0.14914	-0.16963	-0.2322	-0.28333	-0.27715	-0.17766	-0.20249	-0.23793	-0.24947	-0.29854	-0.25336	-0.24973	-0.27234	-0.28135	-0.27278	-0.16831	-0.085202	0.00041457	0.038109	0.13674	0.19306	0.26337	0.27922	0.30462	0.3305	0.35201	0.32774	0.34784	0.36963	0.41142	0.39074	0.42439	0.5163	0.59866	1	0.62338	0.48708	0.4112	0.40925	0.40681	0.37351	0.33717	0.20585
-0.075784	-0.059846	-0.10997	-0.12766	-0.1148	-0.13346	-0.16305	-0.17315	-0.17524	-0.21574	-0.24559	-0.23781	-0.20477	-0.23163	-0.21642	-0.26643	-0.28213	-0.25387	-0.2638	-0.29598	-0.26929	-0.24355	-0.19101	-0.10571	0.032994	0.050253	0.13619	0.17812	0.24075	0.29764	0.28437	0.34535	0.36633	0.36069	0.35442	0.34965	0.40529	0.39861	0.48369	0.58325	1	0.59866	0.50735	0.42169	0.37816	0.40721	0.41202	0.37696	0.31917	0.22426
-0.054099	-0.03394	-0.086997	-0.1655	-0.15612	-0.16976	-0.16785	-0.15342	-0.18066	-0.19886	-0.21576	-0.22859	-0.20613	-0.17592	-0.22368	-0.23346	-0.29281	-0.2682	-0.25011	-0.32677	-0.29282	-0.26058	-0.17007	-0.041795	0.042251	0.051321	0.12978	0.16933	0.24121	0.26852	0.29984	0.34685	0.37598	0.36658	0.36999	0.39481	0.42709	0.50619	0.58513	1	0.58325	0.5163	0.44572	0.38806	0.38552	0.3948	0.40535	0.36113	0.28721	0.20208
0.0013625	0.034277	-0.080231	-0.18001	-0.15036	-0.15469	-0.19078	-0.19998	-0.22058	-0.21353	-0.27591	-0.26154	-0.19664	-0.17419	-0.16966	-0.24135	-0.26961	-0.24515	-0.30572	-0.30329	-0.28681	-0.2516	-0.14265	0.00083647	0.12201	0.10238	0.19757	0.23765	0.29862	0.35853	0.3751	0.41687	0.41544	0.40755	0.43086	0.44285	0.50852	0.595	1	0.58513	0.48369	0.42439	0.4404	0.4335	0.39641	0.40198	0.33678	0.35835	0.3217	0.25393
-0.0015225	-0.029728	-0.15414	-0.23927	-0.20487	-0.14511	-0.17603	-0.19816	-0.21893	-0.25544	-0.30278	-0.30216	-0.22411	-0.15454	-0.17832	-0.26374	-0.28434	-0.28488	-0.30216	-0.31423	-0.32584	-0.22643	-0.12143	0.086826	0.18842	0.19965	0.28154	0.32434	0.38962	0.42963	0.47557	0.49057	0.48877	0.49758	0.51491	0.60285	0.63878	1	0.595	0.50619	0.39861	0.39074	0.43538	0.42595	0.41372	0.395	0.42747	0.4142	0.35137	0.25839
-0.037308	-0.072833	-0.19176	-0.27651	-0.20543	-0.14103	-0.13542	-0.21092	-0.22735	-0.22958	-0.31553	-0.2663	-0.19996	-0.15887	-0.16642	-0.27547	-0.26616	-0.22887	-0.25924	-0.27706	-0.28489	-0.17594	-0.026876	0.12636	0.25158	0.24654	0.31937	0.387	0.44466	0.51596	0.51547	0.51702	0.51357	0.50385	0.56398	0.64503	1	0.63878	0.50852	0.42709	0.40529	0.41142	0.4143	0.43283	0.41238	0.40761	0.44337	0.41275	0.35506	0.22711
-0.12188	-0.11549	-0.18225	-0.23234	-0.1854	-0.10741	-0.16432	-0.1723	-0.21477	-0.21599	-0.23836	-0.2509	-0.18604	-0.13466	-0.1562	-0.22891	-0.21206	-0.20825	-0.19301	-0.20539	-0.2485	-0.12388	-0.013511	0.19598	0.27561	0.30522	0.40555	0.45753	0.54203	0.5586	0.59283	0.56671	0.5795	0.63582	0.67997	1	0.64503	0.60285	0.44285	0.39481	0.34965	0.36963	0.38408	0.43518	0.4618	0.45959	0.45249	0.44914	0.35229	0.22851
-0.15948	-0.11873	-0.15668	-0.20131	-0.12084	-0.11597	-0.13546	-0.18557	-0.19822	-0.14397	-0.20735	-0.22638	-0.15437	-0.15255	-0.11436	-0.20095	-0.18102	-0.16573	-0.16607	-0.16902	-0.15539	-0.088705	0.034714	0.20588	0.34557	0.37827	0.48413	0.53813	0.59248	0.62675	0.63158	0.61046	0.63801	0.70137	1	0.67997	0.56398	0.51491	0.43086	0.36999	0.35442	0.34784	0.3218	0.40141	0.42063	0.42616	0.38166	0.38733	0.31127	0.20725
-0.14058	-0.14631	-0.18136	-0.20498	-0.14776	-0.11427	-0.15261	-0.20481	-0.18745	-0.17399	-0.18316	-0.2196	-0.15876	-0.10207	-0.086482	-0.19256	-0.17919	-0.17505	-0.14134	-0.21342	-0.1714	-0.098351	0.040668	0.23974	0.38874	0.42112	0.51889	0.55357	0.59816	0.6305	0.62718	0.67726	0.71044	1	0.70137	0.63582	0.50385	0.49758	0.40755	0.36658	0.36069	0.32774	0.30672	0.37492	0.37165	0.3644	0.3631	0.36181	0.28864	0.18918
-0.17344	-0.1232	-0.16608	-0.20147	-0.13625	-0.12756	-0.17507	-0.20741	-0.19766	-0.15393	-0.23711	-0.25538	-0.1764	-0.1139	-0.094443	-0.22368	-0.20016	-0.16498	-0.13207	-0.19694	-0.15257	-0.10209	0.044445	0.22989	0.3987	0.47023	0.57654	0.59814	0.63616	0.66867	0.71075	0.7481	1	0.71044	0.63801	0.5795	0.51357	0.48877	0.41544	0.37598	0.36633	0.35201	0.32549	0.37619	0.40469	0.38917	0.37639	0.36954	0.32592	0.191
-0.12462	-0.099045	-0.17386	-0.22596	-0.16164	-0.12922	-0.15734	-0.22464	-0.18885	-0.17515	-0.24587	-0.27857	-0.16651	-0.10651	-0.090436	-0.21361	-0.19234	-0.16655	-0.19385	-0.21501	-0.17334	-0.068376	0.055327	0.25315	0.42882	0.50898	0.59842	0.62902	0.69826	0.77087	0.78248	1	0.7481	0.67726	0.61046	0.56671	0.51702	0.49057	0.41687	0.34685	0.34535	0.3305	0.32412	0.40074	0.38549	0.40614	0.36699	0.35796	0.30326	0.21337
-0.13413	-0.12156	-0.1953	-0.22671	-0.1366	-0.081658	-0.14483	-0.14065	-0.19898	-0.15464	-0.22775	-0.22418	-0.1285	-0.077495	-0.086913	-0.21249	-0.16212	-0.16684	-0.15317	-0.1566	-0.12884	-0.014113	0.10262	0.31925	0.46464	0.55221	0.6485	0.70003	0.7874	0.81098	1	0.78248	0.71075	0.62718	0.63158	0.59283	0.51547	0.47557	0.3751	0.29984	0.28437	0.30462	0.29495	0.37661	0.39166	0.40468	0.37323	0.36857	0.29631	0.20953
-0.13833	-0.11898	-0.22349	-0.23291	-0.15173	-0.098197	-0.098473	-0.18038	-0.20041	-0.16335	-0.23521	-0.21082	-0.11404	-0.078057	-0.099798	-0.21077	-0.15597	-0.13287	-0.14959	-0.12224	-0.11344	0.014337	0.14522	0.33055	0.51523	0.58779	0.677	0.75616	0.80047	1	0.81098	0.77087	0.66867	0.6305	0.62675	0.5586	0.51596	0.42963	0.35853	0.26852	0.29764	0.27922	0.26432	0.35443	0.3416	0.37741	0.3369	0.34508	0.3045	0.19864
-0.17818	-0.17274	-0.26315	-0.23217	-0.13871	-0.05689	-0.095743	-0.13693	-0.18903	-0.16197	-0.20789	-0.1957	-0.096701	-0.065027	-0.11758	-0.18972	-0.11546	-0.12833	-0.11244	-0.094751	-0.074896	0.051464	0.16007	0.38223	0.54689	0.64987	0.74411	0.82961	1	0.80047	0.7874	0.69826	0.63616	0.59816	0.59248	0.54203	0.44466	0.38962	0.29862	0.24121	0.24075	0.26337	0.25318	0.31485	0.33018	0.36563	0.32334	0.32808	0.28843	0.18135
-0.18884	-0.17369	-0.25051	-0.23489	-0.10209	-0.043498	-0.055626	-0.1191	-0.18007	-0.13916	-0.17376	-0.14283	-0.037762	0.0014414	-0.063379	-0.095185	-0.056792	-0.029818	-0.022384	-0.037373	-0.0089659	0.085869	0.24024	0.43538	0.61594	0.72536	0.82558	1	0.82961	0.75616	0.70003	0.62902	0.59814	0.55357	0.53813	0.45753	0.387	0.32434	0.23765	0.16933	0.17812	0.19306	0.18521	0.23862	0.26255	0.27775	0.25494	0.28358	0.25357	0.1387
-0.16565	-0.12373	-0.23902	-0.20893	-0.10382	-0.032933	-0.01675	-0.10584	-0.17345	-0.12826	-0.14753	-0.151	-0.023859	0.04254	-0.023288	-0.07768	-0.036455	-0.014884	-0.0024731	-0.027199	-0.012446	0.081911	0.28067	0.47327	0.69698	0.80614	1	0.82558	0.74411	0.677	0.6485	0.59842	0.57654	0.51889	0.48413	0.40555	0.31937	0.28154	0.19757	0.12978	0.13619	0.13674	0.13424	0.21136	0.22533	0.23089	0.24548	0.26385	0.2124	0.10478
-0.12839	-0.13677	-0.20292	-0.19767	-0.10659	-0.0016821	0.00023421	-0.10336	-0.12438	-0.088646	-0.14063	-0.11154	-0.0056262	0.058227	0.01992	-0.037596	0.034107	0.03849	0.053035	-0.013313	0.042906	0.14454	0.31985	0.5588	0.76	1	0.80614	0.72536	0.64987	0.58779	0.55221	0.50898	0.47023	0.42112	0.37827	0.30522	0.24654	0.19965	0.10238	0.051321	0.050253	0.038109	0.035556	0.12733	0.12125	0.13182	0.16088	0.18616	0.18113	0.06822
-0.11663	-0.093792	-0.14656	-0.15097	-0.035721	0.035575	0.031147	-0.064376	-0.095665	-0.082351	-0.13611	-0.091422	0.012002	0.079672	0.04914	-0.017205	0.036337	0.056963	0.036634	-0.0082107	0.060453	0.17366	0.4045	0.63981	1	0.76	0.69698	0.61594	0.54689	0.51523	0.46464	0.42882	0.3987	0.38874	0.34557	0.27561	0.25158	0.18842	0.12201	0.042251	0.032994	0.00041457	0.015978	0.088098	0.085879	0.087696	0.12612	0.16409	0.14755	0.025104
-0.085545	-0.06832	-0.090344	-0.085363	0.020806	0.094466	0.079518	0.014985	-0.017799	-0.060344	-0.062795	0.016848	0.052231	0.076329	0.058094	0.056853	0.12914	0.14359	0.13803	0.064294	0.144	0.29585	0.50072	1	0.63981	0.5588	0.47327	0.43538	0.38223	0.33055	0.31925	0.25315	0.22989	0.23974	0.20588	0.19598	0.12636	0.086826	0.00083647	-0.041795	-0.10571	-0.085202	-0.063743	-0.016121	-0.0026956	-0.020944	0.063694	0.05926	0.013643	-0.059771
-0.12363	-0.083119	-0.077673	-0.040087	0.086688	0.10409	0.12689	0.09385	0.066461	0.065944	0.045076	0.062993	0.11064	0.10705	0.10098	0.14765	0.16018	0.20623	0.19942	0.21402	0.29605	0.45052	1	0.50072	0.4045	0.31985	0.28067	0.24024	0.16007	0.14522	0.10262	0.055327	0.044445	0.040668	0.034714	-0.013511	-0.026876	-0.12143	-0.14265	-0.17007	-0.19101	-0.16831	-0.18542	-0.11947	-0.12352	-0.15465	-0.11356	-0.10468	-0.11783	-0.16543
-0.050053	-0.080048	-0.040282	0.029978	0.07338	0.099968	0.11765	0.099253	0.1214	0.13468	0.1104	0.15885	0.13196	0.10888	0.11194	0.17516	0.1951	0.1821	0.24354	0.30452	0.43837	1	0.45052	0.29585	0.17366	0.14454	0.081911	0.085869	0.051464	0.014337	-0.014113	-0.068376	-0.10209	-0.098351	-0.088705	-0.12388	-0.17594	-0.22643	-0.2516	-0.26058	-0.24355	-0.27278	-0.21882	-0.18489	-0.23398	-0.26217	-0.22346	-0.23672	-0.17278	-0.192
-0.089798	-0.08577	0.033362	0.084421	0.12952	0.072309	0.076062	0.14926	0.14427	0.22003	0.19279	0.17124	0.09928	0.076317	0.080358	0.18243	0.20605	0.23369	0.31312	0.44264	1	0.43837	0.29605	0.144	0.060453	0.042906	-0.012446	-0.0089659	-0.074896	-0.11344	-0.12884	-0.17334	-0.15257	-0.1714	-0.15539	-0.2485	-0.28489	-0.32584	-0.28681	-0.29282	-0.26929	-0.28135	-0.28193	-0.27858	-0.33676	-0.31703	-0.29213	-0.30423	-0.23646	-0.2281
-0.12486	-0.095045	0.019943	0.10718	0.13959	0.084884	0.11016	0.14731	0.13695	0.19937	0.19546	0.17802	0.14609	0.092628	0.08324	0.20953	0.27856	0.36722	0.46147	1	0.44264	0.30452	0.21402	0.064294	-0.0082107	-0.013313	-0.027199	-0.037373	-0.094751	-0.12224	-0.1566	-0.21501	-0.19694	-0.21342	-0.16902	-0.20539	-0.27706	-0.31423	-0.30329	-0.32677	-0.29598	-0.27234	-0.27224	-0.30053	-0.27803	-0.26867	-0.29178	-0.28154	-0.23538	-0.21715
-0.15521	-0.10651	0.0045165	0.085845	0.087876	0.10791	0.12573	0.11268	0.14848	0.1892	0.23169	0.18056	0.13462	0.10274	0.10482	0.23677	0.41182	0.46582	1	0.46147	0.31312	0.24354	0.19942	0.13803	0.036634	0.053035	-0.0024731	-0.022384	-0.11244	-0.14959	-0.15317	-0.19385	-0.13207	-0.14134	-0.16607	-0.19301	-0.25924	-0.30216	-0.30572	-0.25011	-0.2638	-0.24973	-0.2842	-0.3124	-0.23701	-0.25462	-0.23692	-0.24538	-0.20892	-0.2305
-0.10826	-0.025057	0.040754	0.043669	0.12403	0.087045	0.13576	0.11344	0.12529	0.17845	0.17067	0.1872	0.17982	0.1958	0.21701	0.36011	0.51604	1	0.46582	0.36722	0.23369	0.1821	0.20623	0.14359	0.056963	0.03849	-0.014884	-0.029818	-0.12833	-0.13287	-0.16684	-0.16655	-0.16498	-0.17505	-0.16573	-0.20825	-0.22887	-0.28488	-0.24515	-0.2682	-0.25387	-0.25336	-0.23781	-0.21359	-0.21489	-0.22513	-0.2222	-0.2306	-0.20545	-0.28155
-0.042264	0.012628	0.0040961	0.059292	0.032373	0.013045	0.039105	0.10318	0.17046	0.14137	0.17353	0.20552	0.19781	0.21437	0.31167	0.44794	1	0.51604	0.41182	0.27856	0.20605	0.1951	0.16018	0.12914	0.036337	0.034107	-0.036455	-0.056792	-0.11546	-0.15597	-0.16212	-0.19234	-0.20016	-0.17919	-0.18102	-0.21206	-0.26616	-0.28434	-0.26961	-0.29281	-0.28213	-0.29854	-0.2528	-0.24966	-0.24291	-0.24105	-0.26468	-0.21847	-0.20727	-0.24207
-0.024844	0.058003	0.088687	0.073176	0.043112	0.010027	0.07107	0.15978	0.18011	0.16216	0.17084	0.19723	0.21055	0.29512	0.42438	1	0.44794	0.36011	0.23677	0.20953	0.18243	0.17516	0.14765	0.056853	-0.017205	-0.037596	-0.07768	-0.095185	-0.18972	-0.21077	-0.21249	-0.21361	-0.22368	-0.19256	-0.20095	-0.22891	-0.27547	-0.26374	-0.24135	-0.23346	-0.26643	-0.24947	-0.22116	-0.21228	-0.19181	-0.20964	-0.2417	-0.24533	-0.24339	-0.2469
0.011621	0.070536	0.038232	0.0045845	0.011081	0.046336	0.099479	0.11564	0.14207	0.11867	0.11222	0.18733	0.28735	0.417	1	0.42438	0.31167	0.21701	0.10482	0.08324	0.080358	0.11194	0.10098	0.058094	0.04914	0.01992	-0.023288	-0.063379	-0.11758	-0.099798	-0.086913	-0.090436	-0.094443	-0.086482	-0.11436	-0.1562	-0.16642	-0.17832	-0.16966	-0.22368	-0.21642	-0.23793	-0.18742	-0.15143	-0.14122	-0.16961	-0.19514	-0.20183	-0.19474	-0.18813
-0.011963	0.062728	0.010024	0.0042806	0.06025	0.1391	0.1612	0.1378	0.10952	0.1052	0.098928	0.26435	0.41585	1	0.417	0.29512	0.21437	0.1958	0.10274	0.092628	0.076317	0.10888	0.10705	0.076329	0.079672	0.058227	0.04254	0.0014414	-0.065027	-0.078057	-0.077495	-0.10651	-0.1139	-0.10207	-0.15255	-0.13466	-0.15887	-0.15454	-0.17419	-0.17592	-0.23163	-0.20249	-0.13145	-0.13141	-0.12217	-0.17901	-0.19399	-0.16009	-0.14867	-0.14573
-0.033207	0.010731	-0.053296	0.05584	0.10061	0.13952	0.13828	0.13181	0.090167	0.085134	0.21416	0.36167	1	0.41585	0.28735	0.21055	0.19781	0.17982	0.13462	0.14609	0.09928	0.13196	0.11064	0.052231	0.012002	-0.0056262	-0.023859	-0.037762	-0.096701	-0.11404	-0.1285	-0.16651	-0.1764	-0.15876	-0.15437	-0.18604	-0.19996	-0.22411	-0.19664	-0.20613	-0.20477	-0.17766	-0.16785	-0.19524	-0.14852	-0.19101	-0.18952	-0.18002	-0.15726	-0.15956
0.027676	0.03477	0.034863	0.12179	0.12358	0.087868	0.13965	0.16742	0.14686	0.2238	0.40726	1	0.36167	0.26435	0.18733	0.19723	0.20552	0.1872	0.18056	0.17802	0.17124	0.15885	0.062993	0.016848	-0.091422	-0.11154	-0.151	-0.14283	-0.1957	-0.21082	-0.22418	-0.27857	-0.25538	-0.2196	-0.22638	-0.2509	-0.2663	-0.30216	-0.26154	-0.22859	-0.23781	-0.27715	-0.25432	-0.23799	-0.22371	-0.19951	-0.22354	-0.24901	-0.22292	-0.19688
-0.014769	-0.027525	0.062494	0.12718	0.096261	0.074842	0.12218	0.16488	0.24882	0.36643	1	0.40726	0.21416	0.098928	0.11222	0.17084	0.17353	0.17067	0.23169	0.19546	0.19279	0.1104	0.045076	-0.062795	-0.13611	-0.14063	-0.14753	-0.17376	-0.20789	-0.23521	-0.22775	-0.24587	-0.23711	-0.18316	-0.20735	-0.23836	-0.31553	-0.30278	-0.27591	-0.21576	-0.24559	-0.28333	-0.24397	-0.25122	-0.20696	-0.18922	-0.21674	-0.27322	-0.2644	-0.20978
-0.051695	0.00049311	0.093488	0.064381	0.084001	0.011707	0.087806	0.25208	0.386	1	0.36643	0.2238	0.085134	0.1052	0.11867	0.16216	0.14137	0.17845	0.1892	0.19937	0.22003	0.13468	0.065944	-0.060344	-0.082351	-0.088646	-0.12826	-0.13916	-0.16197	-0.16335	-0.15464	-0.17515	-0.15393	-0.17399	-0.14397	-0.21599	-0.22958	-0.25544	-0.21353	-0.19886	-0.21574	-0.2322	-0.21082	-0.17614	-0.14635	-0.15116	-0.142	-0.22787	-0.19395	-0.17463
0.014683	0.027217	0.097505	0.10487	0.027029	0.060516	0.1643	0.33918	1	0.386	0.24882	0.14686	0.090167	0.10952	0.14207	0.18011	0.17046	0.12529	0.14848	0.13695	0.14427	0.1214	0.066461	-0.017799	-0.095665	-0.12438	-0.17345	-0.18007	-0.18903	-0.20041	-0.19898	-0.18885	-0.19766	-0.18745	-0.19822	-0.21477	-0.22735	-0.21893	-0.22058	-0.18066	-0.17524	-0.16963	-0.12553	-0.1806	-0.14506	-0.1653	-0.14133	-0.21388	-0.20459	-0.17546
0.017186	0.079349	0.13798	0.12776	0.1175	0.17817	0.32094	1	0.33918	0.25208	0.16488	0.16742	0.13181	0.1378	0.11564	0.15978	0.10318	0.11344	0.11268	0.14731	0.14926	0.099253	0.09385	0.014985	-0.064376	-0.10336	-0.10584	-0.1191	-0.13693	-0.18038	-0.14065	-0.22464	-0.20741	-0.20481	-0.18557	-0.1723	-0.21092	-0.19816	-0.19998	-0.15342	-0.17315	-0.14914	-0.16557	-0.16733	-0.14952	-0.14408	-0.085167	-0.13498	-0.16856	-0.15785
0.055433	0.078256	0.065	0.12276	0.21989	0.3966	1	0.32094	0.1643	0.087806	0.12218	0.13965	0.13828	0.1612	0.099479	0.07107	0.039105	0.13576	0.12573	0.11016	0.076062	0.11765	0.12689	0.079518	0.031147	0.00023421	-0.01675	-0.055626	-0.095743	-0.098473	-0.14483	-0.15734	-0.17507	-0.15261	-0.13546	-0.16432	-0.13542	-0.17603	-0.19078	-0.16785	-0.16305	-0.18141	-0.15538	-0.12225	-0.095441	-0.10519	-0.084403	-0.11712	-0.059818	-0.073766
-0.020347	0.015558	0.072398	0.18666	0.27177	1	0.3966	0.17817	0.060516	0.011707	0.074842	0.087868	0.13952	0.1391	0.046336	0.010027	0.013045	0.087045	0.10791	0.084884	0.072309	0.099968	0.10409	0.094466	0.035575	-0.0016821	-0.032933	-0.043498	-0.05689	-0.098197	-0.081658	-0.12922	-0.12756	-0.11427	-0.11597	-0.10741	-0.14103	-0.14511	-0.15469	-0.16976	-0.13346	-0.098668	-0.10876	-0.06309	-0.091705	-0.0911	-0.10259	-0.077014	-0.045972	-0.041259
-0.041477	0.011784	0.21892	0.33376	1	0.27177	0.21989	0.1175	0.027029	0.084001	0.096261	0.12358	0.10061	0.06025	0.011081	0.043112	0.032373	0.12403	0.087876	0.13959	0.12952	0.07338	0.086688	0.020806	-0.035721	-0.10659	-0.10382	-0.10209	-0.13871	-0.15173	-0.1366	-0.16164	-0.13625	-0.14776	-0.12084	-0.1854	-0.20543	-0.20487	-0.15036	-0.15612	-0.1148	-0.12673	-0.13068	-0.11038	-0.0832	-0.12058	-0.12363	-0.13752	-0.10493	-0.086147
0.05752	0.15896	0.39234	1	0.33376	0.18666	0.12276	0.12776	0.10487	0.064381	0.12718	0.12179	0.05584	0.0042806	0.0045845	0.073176	0.059292	0.043669	0.085845	0.10718	0.084421	0.029978	-0.040087	-0.085363	-0.15097	-0.19767	-0.20893	-0.23489	-0.23217	-0.23291	-0.22671	-0.22596	-0.20147	-0.20498	-0.20131	-0.23234	-0.27651	-0.23927	-0.18001	-0.1655	-0.12766	-0.12974	-0.16122	-0.17429	-0.14896	-0.15455	-0.17392	-0.18222	-0.16074	-0.10495
0.21722	0.36306	1	0.39234	0.21892	0.072398	0.065	0.13798	0.097505	0.093488	0.062494	0.034863	-0.053296	0.010024	0.038232	0.088687	0.0040961	0.040754	0.0045165	0.019943	0.033362	-0.040282	-0.077673	-0.090344	-0.14656	-0.20292	-0.23902	-0.25051	-0.26315	-0.22349	-0.1953	-0.17386	-0.16608	-0.18136	-0.15668	-0.18225	-0.19176	-0.15414	-0.080231	-0.086997	-0.10997	-0.1127	-0.11673	-0.10277	-0.098154	-0.12893	-0.085705	-0.099853	-0.12871	-0.065116
0.4398	1	0.36306	0.15896	0.011784	0.015558	0.078256	0.079349	0.027217	0.00049311	-0.027525	0.03477	0.010731	0.062728	0.070536	0.058003	0.012628	-0.025057	-0.10651	-0.095045	-0.08577	-0.080048	-0.083119	-0.06832	-0.093792	-0.13677	-0.12373	-0.17369	-0.17274	-0.11898	-0.12156	-0.099045	-0.1232	-0.14631	-0.11873	-0.11549	-0.072833	-0.029728	0.034277	-0.03394	-0.059846	-0.11302	-0.068494	-0.04755	-0.07442	-0.044571	-6.898e-05	-0.035548	0.0052296	0.057169
1	0.4398	0.21722	0.05752	-0.041477	-0.020347	0.055433	0.017186	0.014683	-0.051695	-0.014769	0.027676	-0.033207	-0.011963	0.011621	-0.024844	-0.042264	-0.10826	-0.15521	-0.12486	-0.089798	-0.050053	-0.12363	-0.085545	-0.11663	-0.12839	-0.16565	-0.18884	-0.17818	-0.13833	-0.13413	-0.12462	-0.17344	-0.14058	-0.15948	-0.12188	-0.037308	-0.0015225	0.0013625	-0.054099	-0.075784	-0.093169	-0.07275	-0.041152	-0.076711	-0.042608	0.011716	-0.011693	0.030098	0.10327
[truncated: 11 more columns]

## Sheet: Figure3_supplement3C
-0.0039899	-0.019263	0.0076773	-0.048792	-0.048893	0.062559	0.050887	0.071627	-0.025169	-0.038338	-0.060758	-0.054387	-0.087512	-0.12082	-0.038559	-0.077374	-0.05632	-0.10372	-0.079556	-0.050302	-0.0070217	-0.074007	-0.089948	-0.12159	-0.08442	-0.051235	-0.12302	-0.09426	-0.066214	-0.024268	-0.054571	-0.093952	-0.073602	-0.031697	0.0067411	-0.005696	0.024856	0.05706	0.026192	0.036961	0.078288	0.064059	0.079536	0.034709	0.042068	0.027167	0.031071	0.028375	-0.016872	-0.028694
-0.033965	-0.039987	-0.051113	-0.040014	0.026192	-0.0059351	0.020484	-0.036086	-0.036406	-0.028442	0.031033	-0.012362	-0.030887	-0.013964	0.019315	-0.014626	-0.08113	-0.034976	-0.04573	-0.00058678	-0.028832	-0.066799	-0.037754	-0.055163	-0.04216	-0.03962	-0.078408	-0.096192	-0.12061	-0.073241	-0.11067	-0.088874	-0.092896	-0.01651	-0.037093	-0.066098	-0.03056	0.0056142	-0.025799	-0.065407	0.0065737	-0.011508	0.066712	0.061289	0.076583	-0.038617	-0.026786	0.017086	-0.0065006	0.016127
0.056061	0.046703	-0.019702	0.047259	-0.039405	0.015563	0.080428	-0.016358	0.023175	0.044136	-0.01241	-0.0029179	-0.0147	-0.010096	-0.051189	-0.035118	-0.051355	0.011605	-0.046425	-0.061505	-0.071075	-0.081298	-0.10528	-0.10835	-0.15163	-0.15127	-0.16654	-0.1244	-0.13597	-0.13721	-0.16313	-0.085344	-0.10533	-0.093866	-0.083067	-0.045268	-0.017926	-0.011193	-0.098434	-0.1019	-0.037586	-0.068233	0.040545	0.052968	0.037423	0.038367	0.029369	0.015075	0.056807	0.056578
0.065195	0.068145	0.025527	0.015774	-0.026888	-0.021487	-0.014078	-0.010371	-0.025477	0.016631	-0.0097713	-0.056022	-0.038733	-0.094383	-0.059826	-0.030285	-0.06018	-0.037083	-0.074044	-0.11463	-0.068251	-0.091112	-0.12565	-0.1399	-0.15193	-0.20061	-0.1414	-0.10969	-0.13089	-0.10443	-0.1253	-0.07671	-0.056713	-0.048542	-0.027735	-0.0098448	0.020497	-0.043988	-0.068713	-0.010767	0.015664	0.030692	0.061176	0.12073	0.071904	0.11238	0.12371	0.071326	0.067098	0.095262
0.059543	0.045509	0.019019	0.012567	0.03401	0.051501	-0.0019972	-0.0056271	0.019908	0.045809	0.014978	-0.017875	0.01053	0.00060865	-0.068446	-0.10195	-0.080945	-0.085829	-0.10471	-0.037652	-0.12013	-0.15613	-0.15818	-0.16228	-0.15306	-0.12745	-0.12945	-0.1445	-0.13619	-0.14943	-0.12356	-0.10213	-0.10814	-0.032676	-0.029349	-0.050761	-0.048253	-0.0060765	-0.010446	-0.054102	-0.0037416	0.02395	0.10493	0.092124	0.076857	0.061108	0.070344	0.093142	0.040187	0.073314
0.051529	0.056301	-0.013242	0.034157	-0.032042	0.049977	0.070564	0.044672	0.038243	-0.0041624	0.048843	0.048573	0.045538	-0.047269	-0.045541	-0.062942	-0.047667	-0.032875	-0.072643	-0.11964	-0.15812	-0.15932	-0.14541	-0.16841	-0.16504	-0.13732	-0.12472	-0.14632	-0.069935	-0.04653	0.00084738	-0.021858	-0.043918	-0.042111	0.0004197	-0.02518	-0.028503	-0.0015944	-0.048549	-0.066146	-0.011757	0.02298	0.021675	0.094571	0.087945	0.12911	0.080404	-0.014503	0.027211	0.082555
0.00070976	0.047725	0.034682	0.014921	0.023618	0.027791	0.029016	-0.04708	0.018404	-0.010265	0.047165	0.010583	-0.031153	0.00023465	-0.04322	-0.062985	-0.1055	-0.1048	-0.13187	-0.20497	-0.21127	-0.19046	-0.17909	-0.21005	-0.16242	-0.1715	-0.11702	-0.11025	-0.062608	-0.077325	-0.053896	-0.046454	0.025757	-0.010768	-0.025848	-0.031899	-0.014709	0.059692	-0.029372	-0.05263	-0.024981	0.012304	0.08704	0.085086	0.082863	0.047904	0.024623	-0.027829	0.099041	0.064401
-0.0037102	0.015747	0.036658	0.043776	0.050001	-0.0028578	-0.0045483	-0.031798	-0.030916	-0.003906	-0.0041203	-0.036642	-0.045267	-0.023886	-0.049073	-0.054338	-0.15134	-0.13364	-0.1846	-0.20543	-0.22251	-0.19155	-0.20374	-0.20678	-0.13346	-0.13726	-0.10351	-0.085869	-0.044762	-0.053638	-0.062976	-0.012697	0.052458	0.042814	0.077991	-0.025881	-0.043338	0.078308	0.11918	0.05639	-0.003824	0.062154	0.0329	0.048381	0.005731	-0.0082062	-0.026424	-0.015721	0.046014	0.064425
-0.0017076	0.009649	0.033499	0.03119	0.067261	0.00624	0.027524	0.034284	0.009688	-0.013299	0.029662	-0.050985	-0.056981	-0.11994	-0.085723	-0.091739	-0.11717	-0.16409	-0.17649	-0.16376	-0.15121	-0.15774	-0.13406	-0.12709	-0.088725	-0.099869	-0.12741	-0.060605	-0.039383	-0.052413	-0.090564	-0.0015154	0.040887	0.013384	0.024641	0.035206	-0.044748	0.050929	0.066002	0.0061236	0.013644	0.083201	0.065582	0.064675	0.057281	0.032531	-0.0062127	-0.012021	0.029191	0.045623
0.0096188	-0.015778	0.085634	0.066154	0.10621	0.056503	0.04365	0.020509	0.030755	-0.00049655	0.033826	-0.013541	-0.016891	-0.072196	-0.086446	-0.056463	-0.089244	-0.1031	-0.11638	-0.10815	-0.16735	-0.21601	-0.17328	-0.16443	-0.18317	-0.1361	-0.16241	-0.12844	-0.12176	-0.096232	-0.11575	0.01994	-0.0053198	-0.0057721	0.060842	0.025199	0.019592	0.020756	0.06004	-0.011621	0.015161	0.0574	0.018289	0.026969	0.068469	0.023327	0.078007	0.10461	0.065534	0.070327
0.019326	0.057502	0.10433	0.088422	0.068928	0.027391	0.1017	0.024242	0.041408	-0.0030977	0.009737	-0.048256	-0.080349	-0.098222	-0.09727	-0.1272	-0.11404	-0.10281	-0.093478	-0.18844	-0.18314	-0.21743	-0.22799	-0.2242	-0.19274	-0.18675	-0.21791	-0.17844	-0.15158	-0.14173	-0.091857	-0.058797	-0.0030966	-0.0020371	0.054323	0.025933	0.0054269	0.018107	0.027887	-0.010724	-0.025608	0.054084	0.019817	0.029591	0.081649	0.098899	0.10417	0.12565	0.12111	0.23458
-0.046462	0.03929	-0.019144	0.020071	0.054305	0.0089897	0.0066185	0.019984	-0.038495	0.029824	0.030931	0.010052	0.00080767	-0.014172	-0.055201	-0.13556	-0.085151	-0.10426	-0.1038	-0.11976	-0.12786	-0.1292	-0.13267	-0.14231	-0.12903	-0.14848	-0.12795	-0.11558	-0.060116	-0.11684	-0.063257	-0.067992	-0.028473	0.022682	0.042167	0.044592	0.026489	-0.0081604	0.046219	0.019174	-0.011797	0.070137	0.087397	0.1211	0.086086	0.044855	0.023161	0.075401	0.26853	1
0.025954	0.063477	0.058025	0.081824	0.028775	0.019278	0.063586	0.024488	-0.034688	-0.001145	-0.0077492	-0.021564	0.03319	-0.058758	-0.17244	-0.12691	-0.13717	-0.12537	-0.12643	-0.15121	-0.1806	-0.15506	-0.15456	-0.16942	-0.17518	-0.13984	-0.089605	-0.042526	-0.073534	-0.045172	-0.01606	0.01792	0.04311	0.0634	0.055229	0.047494	0.057448	0.051098	0.023173	-0.018414	0.016333	0.049352	0.10773	0.047236	0.10984	0.047312	0.10656	0.23481	1	0.26853
0.040973	0.0536	0.084563	0.041494	0.074745	-0.0054406	-0.0089526	0.023162	0.00025239	-0.012776	-0.072468	-0.08068	-0.069673	-0.061861	-0.12276	-0.067923	-0.095832	-0.10096	-0.11271	-0.1079	-0.16425	-0.19113	-0.16328	-0.16337	-0.16126	-0.10359	-0.052332	-0.052755	-0.04243	0.010626	0.01638	0.00040643	0.0011226	0.012965	0.07034	0.07435	0.098012	0.085453	0.01117	0.030523	0.028814	0.025063	0.027685	-0.014956	0.063026	0.10261	0.26994	1	0.23481	0.075401
0.046316	0.029017	0.044138	0.08206	0.05865	0.023285	0.062017	0.087768	0.030334	-0.034008	-0.066762	-0.046856	0.020283	-0.06647	-0.073345	-0.10391	-0.028466	-0.053084	-0.053083	-0.099543	-0.11622	-0.10915	-0.14877	-0.13923	-0.11322	-0.085588	-0.10468	-0.069109	-0.047321	-0.053722	0.03581	0.0005002	-0.0010327	-0.024464	0.070365	0.078816	0.043977	0.049744	-0.041167	-0.0072169	0.0089408	0.087799	0.05058	0.084337	0.12743	0.31495	1	0.26994	0.10656	0.023161
0.031822	0.02783	-0.001553	0.066811	0.0384	0.014513	0.058156	0.04655	0.03158	-0.041579	-0.072448	-0.025823	0.025728	-0.0036966	0.019663	-0.057642	-0.030207	-0.017101	-0.008497	-0.085652	-0.082035	-0.090186	-0.13564	-0.10812	-0.080218	-0.080686	-0.11952	-0.070867	-0.05064	-0.040695	-0.0054216	-0.034748	-0.027595	-0.015691	0.033275	0.048147	0.0029095	-0.030947	-0.051096	-0.0026205	0.058361	0.10075	0.085212	0.14848	0.27317	1	0.31495	0.10261	0.047312	0.044855
-0.030129	0.0021899	0.017996	0.046416	0.012235	-0.0063388	0.0095771	0.021031	0.0050217	-0.020254	-0.036547	0.005108	-0.0049367	0.041776	-0.080315	-0.11945	-0.045532	-0.046764	-0.13057	-0.10974	-0.13181	-0.13932	-0.15826	-0.16323	-0.10719	-0.075005	-0.094082	-0.10115	-0.065809	-0.059722	-0.0094775	0.0071741	0.024	0.050782	0.050938	0.032832	0.035572	0.027936	0.028563	0.062651	0.070614	0.15008	0.2622	0.30276	1	0.27317	0.12743	0.063026	0.10984	0.086086
-0.047432	-0.04759	-0.0058606	0.014562	-0.032176	-0.034746	-0.01888	-0.0064834	-0.085085	-0.063283	-0.092644	-0.034633	0.029171	-0.012562	-0.058125	-0.1028	-0.027475	-0.035277	-0.083943	-0.078511	-0.093439	-0.10596	-0.12398	-0.15013	-0.091684	-0.10602	-0.11557	-0.11997	-0.051548	-0.066282	-0.06017	-0.00074296	-0.0067313	0.057603	0.056406	0.08418	0.019389	0.02352	0.0081431	0.022923	0.11144	0.21864	0.33637	1	0.30276	0.14848	0.084337	-0.014956	0.047236	0.1211
-0.042367	-0.02606	-0.04838	-0.088294	-0.027671	-0.048441	0.0096676	0.027723	-0.039097	-0.016922	-0.065354	-0.01756	-0.0106	-0.034232	-0.098902	-0.12226	-0.083233	-0.10471	-0.1373	-0.10464	-0.16399	-0.18977	-0.16404	-0.14863	-0.12157	-0.1542	-0.10268	-0.0539	0.021968	0.022435	-0.0035824	0.048525	0.052813	0.10845	0.098072	0.13176	0.066137	0.065937	0.086523	0.075994	0.18976	0.32987	1	0.33637	0.2622	0.085212	0.05058	0.027685	0.10773	0.087397
-0.03802	-0.054731	-0.052922	-0.0087895	-0.028805	0.013749	0.068036	0.035211	-0.039402	-0.0020642	-0.056887	-0.05526	-0.044157	-0.12342	-0.13872	-0.14249	-0.0999	-0.16083	-0.19368	-0.18984	-0.22353	-0.21713	-0.20928	-0.16117	-0.1021	-0.083319	-0.032583	0.022234	0.10146	0.062739	0.096866	0.091378	0.11929	0.098861	0.14011	0.1122	0.042313	0.025697	0.075405	0.17501	0.31051	1	0.32987	0.21864	0.15008	0.10075	0.087799	0.025063	0.049352	0.070137
-0.047324	-0.073519	-0.048499	-0.043963	-0.0035164	0.010602	-0.029315	-0.0092038	-0.053296	-0.093229	-0.10672	-0.050286	-0.10347	-0.11287	-0.06383	-0.10581	-0.16486	-0.15076	-0.16016	-0.095479	-0.12621	-0.16068	-0.14067	-0.13968	-0.086239	-0.01064	-0.0025136	0.086147	0.19092	0.11359	0.073524	0.1107	0.12063	0.10321	0.20887	0.057294	0.065945	0.083481	0.13696	0.34892	1	0.31051	0.18976	0.11144	0.070614	0.058361	0.0089408	0.028814	0.016333	-0.011797
-0.044991	-0.069177	-0.024109	-0.034231	-0.037384	-0.066099	-0.064738	0.028639	-0.057086	-0.052208	-0.084098	-0.086972	-0.14592	-0.10241	-0.090508	-0.10964	-0.10506	-0.15299	-0.18794	-0.12875	-0.11345	-0.13242	-0.14816	-0.10949	-0.057779	0.012056	0.064475	0.14324	0.19752	0.1374	0.12046	0.091599	0.17433	0.19291	0.21441	0.10506	0.01613	0.10887	0.28634	1	0.34892	0.17501	0.075994	0.022923	0.062651	-0.0026205	-0.0072169	0.030523	-0.018414	0.019174
-0.080603	-0.058034	0.031187	-0.026021	0.016018	-0.094171	-0.067653	-0.023047	-0.063915	-0.055881	-0.093996	-0.11001	-0.14483	-0.075821	-0.069936	-0.094862	-0.13228	-0.18855	-0.16935	-0.11766	-0.12139	-0.13837	-0.12428	-0.12403	-0.085721	-0.014678	0.028759	0.10874	0.1589	0.094145	0.07755	0.085491	0.14127	0.15555	0.19052	0.13569	0.07708	0.22592	1	0.28634	0.13696	0.075405	0.086523	0.0081431	0.028563	-0.051096	-0.041167	0.01117	0.023173	0.046219
-0.0036248	0.0076571	0.063647	0.0076403	-0.055805	-0.030751	-0.0088853	-0.034593	-0.088291	-0.068447	-0.049266	-0.070555	-0.13206	-0.086859	-0.085715	-0.094634	-0.092223	-0.15032	-0.14183	-0.15879	-0.23125	-0.1988	-0.19479	-0.16106	-0.12997	-0.072	-7.5096e-05	0.063834	0.11547	0.11059	0.096146	0.053896	0.12162	0.14314	0.17022	0.18886	0.31375	1	0.22592	0.10887	0.083481	0.025697	0.065937	0.02352	0.027936	-0.030947	0.049744	0.085453	0.051098	-0.0081604
-0.034281	0.00045006	0.010958	-0.002383	-0.094241	-0.01488	-0.05775	-0.038	-0.052092	-0.053946	-0.093883	-0.02759	-0.013198	0.0011354	-0.019503	-0.011105	-0.019588	-0.064034	-0.0411	-0.064987	-0.087882	-0.085537	-0.062284	-0.035796	-0.0617	0.0013414	0.041656	0.091005	0.074941	0.088717	0.042138	0.037381	0.10893	0.12273	0.16925	0.29509	1	0.31375	0.07708	0.01613	0.065945	0.042313	0.066137	0.019389	0.035572	0.0029095	0.043977	0.098012	0.057448	0.026489
-0.038378	-0.014188	-0.053069	-0.010228	-0.01442	-0.055543	-0.02647	-0.006079	-0.075343	-0.072542	-0.1001	-0.092653	-0.016662	-0.05803	-0.055714	-0.099217	-0.024521	-0.095519	-0.06555	-0.094244	-0.065066	-0.061697	-0.069582	-0.083061	-0.069193	0.0011146	0.05241	0.09933	0.11368	0.1707	0.15822	0.11296	0.12366	0.19101	0.33015	1	0.29509	0.18886	0.13569	0.10506	0.057294	0.1122	0.13176	0.08418	0.032832	0.048147	0.078816	0.07435	0.047494	0.044592
-0.0638	-0.024825	-0.046116	-0.035895	-0.060614	-0.053996	-0.036905	0.011341	-0.080686	-0.12286	-0.086231	-0.074496	-0.048717	-0.093541	-0.11635	-0.12532	-0.1252	-0.14364	-0.080356	-0.11293	-0.1413	-0.16247	-0.18888	-0.14833	-0.077786	0.0043082	0.082136	0.14539	0.1943	0.20021	0.18629	0.16599	0.25918	0.35173	1	0.33015	0.16925	0.17022	0.19052	0.21441	0.20887	0.14011	0.098072	0.056406	0.050938	0.033275	0.070365	0.07034	0.055229	0.042167
-0.075276	-0.036279	-0.040546	-0.067348	-0.1026	-0.084775	-0.050208	-0.07587	-0.038502	-0.08074	-0.074554	-0.06604	-0.020684	-0.023029	-0.087648	-0.10358	-0.12952	-0.18056	-0.16662	-0.11297	-0.20001	-0.17919	-0.14851	-0.090494	-0.045515	0.055813	0.14883	0.21095	0.24894	0.24495	0.23212	0.25786	0.39234	1	0.35173	0.19101	0.12273	0.14314	0.15555	0.19291	0.10321	0.098861	0.10845	0.057603	0.050782	-0.015691	-0.024464	0.012965	0.0634	0.022682
-0.091347	-0.018896	-0.049797	-0.11143	-0.12957	-0.087857	-0.06628	-0.094843	-0.05556	-0.070642	-0.063571	-0.031227	-0.066919	-0.063567	-0.039093	-0.1026	-0.083017	-0.14014	-0.16404	-0.16725	-0.1629	-0.13858	-0.12144	-0.11479	-0.024464	0.044451	0.13848	0.21295	0.25666	0.25886	0.31233	0.38915	1	0.39234	0.25918	0.12366	0.10893	0.12162	0.14127	0.17433	0.12063	0.11929	0.052813	-0.0067313	0.024	-0.027595	-0.0010327	0.0011226	0.04311	-0.028473
-0.090994	-0.031763	-0.065889	-0.055864	-0.038295	-0.088851	-0.058095	-0.063874	-0.027391	-0.021817	-0.041057	-0.0056095	-0.032612	-0.011439	-0.06576	-0.085011	-0.077224	-0.098368	-0.088506	-0.044812	-0.10059	-0.088233	-0.069283	-0.052175	0.0098412	0.063122	0.14638	0.21476	0.19254	0.25908	0.40827	1	0.38915	0.25786	0.16599	0.11296	0.037381	0.053896	0.085491	0.091599	0.1107	0.091378	0.048525	-0.00074296	0.0071741	-0.034748	0.0005002	0.00040643	0.01792	-0.067992
-0.023707	0.0086043	-0.024273	0.0042056	-0.12263	-0.077276	-0.084777	-0.068536	-0.04975	-0.057385	-0.092084	-0.04076	-0.079376	-0.074531	-0.066297	-0.10019	-0.070818	-0.091213	-0.099735	-0.070909	-0.071384	-0.0019185	-0.010808	0.038563	0.060566	0.13374	0.22631	0.24338	0.32551	0.42962	1	0.40827	0.31233	0.23212	0.18629	0.15822	0.042138	0.096146	0.07755	0.12046	0.073524	0.096866	-0.0035824	-0.06017	-0.0094775	-0.0054216	0.03581	0.01638	-0.01606	-0.063257
-0.0092781	-0.0013667	-0.029887	-0.095118	-0.14785	-0.054846	-0.05258	-0.026141	-0.061667	-0.081723	-0.14205	-0.094436	-0.063815	-0.050235	-0.044624	-0.045033	-0.084342	-0.15433	-0.089685	-0.07358	-0.072534	-0.013557	-0.0037995	0.057042	0.076679	0.1035	0.21687	0.30358	0.45837	1	0.42962	0.25908	0.25886	0.24495	0.20021	0.1707	0.088717	0.11059	0.094145	0.1374	0.11359	0.062739	0.022435	-0.066282	-0.059722	-0.040695	-0.053722	0.010626	-0.045172	-0.11684
-0.068583	-0.056548	-0.10684	-0.12082	-0.098001	-0.074003	-0.12194	-0.036598	-0.090587	-0.12342	-0.15351	-0.13081	-0.13409	-0.11611	-0.055201	-0.12665	-0.12916	-0.18782	-0.14177	-0.08059	-0.080181	-0.043285	-0.037494	0.052621	0.11964	0.19801	0.33737	0.49418	1	0.45837	0.32551	0.19254	0.25666	0.24894	0.1943	0.11368	0.074941	0.11547	0.1589	0.19752	0.19092	0.10146	0.021968	-0.051548	-0.065809	-0.05064	-0.047321	-0.04243	-0.073534	-0.060116
-0.11591	-0.13335	-0.13896	-0.19613	-0.15109	-0.11023	-0.14739	-0.11963	-0.10943	-0.1484	-0.079936	-0.13323	-0.11835	-0.09817	-0.070434	-0.073717	-0.10112	-0.098777	-0.038235	0.040462	0.056165	0.095431	0.12294	0.21243	0.25232	0.34492	0.50616	1	0.49418	0.30358	0.24338	0.21476	0.21295	0.21095	0.14539	0.09933	0.091005	0.063834	0.10874	0.14324	0.086147	0.022234	-0.0539	-0.11997	-0.10115	-0.070867	-0.069109	-0.052755	-0.042526	-0.11558
-0.14934	-0.12948	-0.21569	-0.14601	-0.16408	-0.12486	-0.17547	-0.17299	-0.12161	-0.13994	-0.1063	-0.098761	-0.027631	-0.0022415	-0.043639	-0.0083555	-0.0027993	-0.018642	0.02863	0.14564	0.20279	0.26644	0.29311	0.3433	0.39989	0.53331	1	0.50616	0.33737	0.21687	0.22631	0.14638	0.13848	0.14883	0.082136	0.05241	0.041656	-7.5096e-05	0.028759	0.064475	-0.0025136	-0.032583	-0.10268	-0.11557	-0.094082	-0.11952	-0.10468	-0.052332	-0.089605	-0.12795
-0.13015	-0.16463	-0.18598	-0.11241	-0.089219	-0.078054	-0.16314	-0.12343	-0.10747	-0.12913	-0.097694	-0.05961	0.02467	0.058793	0.045247	0.046854	0.073775	0.066559	0.13909	0.22098	0.29335	0.38197	0.42175	0.4485	0.57776	1	0.53331	0.34492	0.19801	0.1035	0.13374	0.063122	0.044451	0.055813	0.0043082	0.0011146	0.0013414	-0.072	-0.014678	0.012056	-0.01064	-0.083319	-0.1542	-0.10602	-0.075005	-0.080686	-0.085588	-0.10359	-0.13984	-0.14848
-0.12092	-0.13262	-0.1966	-0.1064	-0.080543	-0.16312	-0.18916	-0.16464	-0.17325	-0.16295	-0.10748	-0.093703	-0.0049189	0.070426	0.1022	0.089301	0.14966	0.16408	0.28697	0.34261	0.4181	0.52774	0.59781	0.65059	1	0.57776	0.39989	0.25232	0.11964	0.076679	0.060566	0.0098412	-0.024464	-0.045515	-0.077786	-0.069193	-0.0617	-0.12997	-0.085721	-0.057779	-0.086239	-0.1021	-0.12157	-0.091684	-0.10719	-0.080218	-0.11322	-0.16126	-0.17518	-0.12903
-0.10144	-0.15133	-0.17542	-0.12068	-0.07703	-0.13612	-0.15336	-0.16817	-0.099426	-0.11008	-0.060576	-0.040604	0.075812	0.13154	0.11962	0.16038	0.24888	0.30872	0.34312	0.43243	0.54361	0.61355	0.72431	1	0.65059	0.4485	0.3433	0.21243	0.052621	0.057042	0.038563	-0.052175	-0.11479	-0.090494	-0.14833	-0.083061	-0.035796	-0.16106	-0.12403	-0.10949	-0.13968	-0.16117	-0.14863	-0.15013	-0.16323	-0.10812	-0.13923	-0.16337	-0.16942	-0.14231
-0.085597	-0.1513	-0.19455	-0.11008	-0.047507	-0.13857	-0.18833	-0.15581	-0.11225	-0.10285	-0.047195	-0.003772	0.10578	0.13435	0.1621	0.2005	0.30151	0.35066	0.40317	0.50765	0.63588	0.73602	1	0.72431	0.59781	0.42175	0.29311	0.12294	-0.037494	-0.0037995	-0.010808	-0.069283	-0.12144	-0.14851	-0.18888	-0.069582	-0.062284	-0.19479	-0.12428	-0.14816	-0.14067	-0.20928	-0.16404	-0.12398	-0.15826	-0.13564	-0.14877	-0.16328	-0.15456	-0.13267
-0.0822	-0.13553	-0.1549	-0.093306	-0.078561	-0.10299	-0.17421	-0.14611	-0.088491	-0.097226	-0.066919	-0.019942	0.09832	0.11471	0.15034	0.21659	0.33625	0.37272	0.4509	0.53949	0.72756	1	0.73602	0.61355	0.52774	0.38197	0.26644	0.095431	-0.043285	-0.013557	-0.0019185	-0.088233	-0.13858	-0.17919	-0.16247	-0.061697	-0.085537	-0.1988	-0.13837	-0.13242	-0.16068	-0.21713	-0.18977	-0.10596	-0.13932	-0.090186	-0.10915	-0.19113	-0.15506	-0.1292
-0.03745	-0.10837	-0.15164	-0.080826	-0.066643	-0.08404	-0.1514	-0.087258	-0.03437	-0.053774	-0.059101	0.0049684	0.11353	0.15101	0.21825	0.22835	0.33244	0.3726	0.4929	0.6264	1	0.72756	0.63588	0.54361	0.4181	0.29335	0.20279	0.056165	-0.080181	-0.072534	-0.071384	-0.10059	-0.1629	-0.20001	-0.1413	-0.065066	-0.087882	-0.23125	-0.12139	-0.11345	-0.12621	-0.22353	-0.16399	-0.093439	-0.13181	-0.082035	-0.11622	-0.16425	-0.1806	-0.12786
-0.094414	-0.14732	-0.16172	-0.073672	-0.014698	-0.054911	-0.11022	-0.066244	-0.006601	-0.017678	-0.025265	0.022304	0.16355	0.24697	0.23484	0.2419	0.32622	0.3745	0.53557	1	0.6264	0.53949	0.50765	0.43243	0.34261	0.22098	0.14564	0.040462	-0.08059	-0.07358	-0.070909	-0.044812	-0.16725	-0.11297	-0.11293	-0.094244	-0.064987	-0.15879	-0.11766	-0.12875	-0.095479	-0.18984	-0.10464	-0.078511	-0.10974	-0.085652	-0.099543	-0.1079	-0.15121	-0.11976
-0.039706	-0.095453	-0.11287	-0.051731	-0.0093562	-0.038567	-0.033662	-0.038449	-0.0095436	-0.025969	-0.0097224	0.12388	0.20179	0.24807	0.2875	0.27533	0.36416	0.50685	1	0.53557	0.4929	0.4509	0.40317	0.34312	0.28697	0.13909	0.02863	-0.038235	-0.14177	-0.089685	-0.099735	-0.088506	-0.16404	-0.16662	-0.080356	-0.06555	-0.0411	-0.14183	-0.16935	-0.18794	-0.16016	-0.19368	-0.1373	-0.083943	-0.13057	-0.008497	-0.053083	-0.11271	-0.12643	-0.1038
-0.06361	-0.082175	-0.096975	-0.0077928	-0.013934	-0.03814	-0.047855	-0.013566	0.048431	0.0035142	0.032565	0.16598	0.22344	0.22755	0.22534	0.32481	0.49477	1	0.50685	0.3745	0.3726	0.37272	0.35066	0.30872	0.16408	0.066559	-0.018642	-0.098777	-0.18782	-0.15433	-0.091213	-0.098368	-0.14014	-0.18056	-0.14364	-0.095519	-0.064034	-0.15032	-0.18855	-0.15299	-0.15076	-0.16083	-0.10471	-0.035277	-0.046764	-0.017101	-0.053084	-0.10096	-0.12537	-0.10426
-0.028736	-0.071254	-0.073095	-0.018563	-0.037019	-0.086979	-0.074877	-0.029856	0.04409	0.028801	0.050003	0.1126	0.19125	0.22494	0.25674	0.39355	1	0.49477	0.36416	0.32622	0.33244	0.33625	0.30151	0.24888	0.14966	0.073775	-0.0027993	-0.10112	-0.12916	-0.084342	-0.070818	-0.077224	-0.083017	-0.12952	-0.1252	-0.024521	-0.019588	-0.092223	-0.13228	-0.10506	-0.16486	-0.0999	-0.083233	-0.027475	-0.045532	-0.030207	-0.028466	-0.095832	-0.13717	-0.085151
-0.012525	-0.079982	-0.048033	-0.037873	-0.043082	-0.050657	-0.058444	0.0080119	0.091916	0.11593	0.080712	0.11766	0.11264	0.24909	0.38627	1	0.39355	0.32481	0.27533	0.2419	0.22835	0.21659	0.2005	0.16038	0.089301	0.046854	-0.0083555	-0.073717	-0.12665	-0.045033	-0.10019	-0.085011	-0.1026	-0.10358	-0.12532	-0.099217	-0.011105	-0.094634	-0.094862	-0.10964	-0.10581	-0.14249	-0.12226	-0.1028	-0.11945	-0.057642	-0.10391	-0.067923	-0.12691	-0.13556
-0.050209	-0.041363	-0.10453	-0.088257	-0.0082525	-0.011279	-0.0059444	0.013137	0.084621	0.09777	0.085504	0.13517	0.18851	0.35365	1	0.38627	0.25674	0.22534	0.2875	0.23484	0.21825	0.15034	0.1621	0.11962	0.1022	0.045247	-0.043639	-0.070434	-0.055201	-0.044624	-0.066297	-0.06576	-0.039093	-0.087648	-0.11635	-0.055714	-0.019503	-0.085715	-0.069936	-0.090508	-0.06383	-0.13872	-0.098902	-0.058125	-0.080315	0.019663	-0.073345	-0.12276	-0.17244	-0.055201
-0.065059	-0.026308	-0.049524	-0.01834	0.038527	0.072889	0.0097771	0.031697	0.11407	0.15956	0.087193	0.26259	0.37681	1	0.35365	0.24909	0.22494	0.22755	0.24807	0.24697	0.15101	0.11471	0.13435	0.13154	0.070426	0.058793	-0.0022415	-0.09817	-0.11611	-0.050235	-0.074531	-0.011439	-0.063567	-0.023029	-0.093541	-0.05803	0.0011354	-0.086859	-0.075821	-0.10241	-0.11287	-0.12342	-0.034232	-0.012562	0.041776	-0.0036966	-0.06647	-0.061861	-0.058758	-0.014172
-0.01346	-0.017251	-0.042797	0.014259	0.022467	0.13284	0.071097	0.12457	0.15783	0.15213	0.1766	0.38417	1	0.37681	0.18851	0.11264	0.19125	0.22344	0.20179	0.16355	0.11353	0.09832	0.10578	0.075812	-0.0049189	0.02467	-0.027631	-0.11835	-0.13409	-0.063815	-0.079376	-0.032612	-0.066919	-0.020684	-0.048717	-0.016662	-0.013198	-0.13206	-0.14483	-0.14592	-0.10347	-0.044157	-0.0106	0.029171	-0.0049367	0.025728	0.020283	-0.069673	0.03319	0.00080767
0.00046988	-0.03223	-0.021747	0.038836	0.03581	0.1087	0.080491	0.10455	0.19343	0.23693	0.35716	1	0.38417	0.26259	0.13517	0.11766	0.1126	0.16598	0.12388	0.022304	0.0049684	-0.019942	-0.003772	-0.040604	-0.093703	-0.05961	-0.098761	-0.13323	-0.13081	-0.094436	-0.04076	-0.0056095	-0.031227	-0.06604	-0.074496	-0.092653	-0.02759	-0.070555	-0.11001	-0.086972	-0.050286	-0.05526	-0.01756	-0.034633	0.005108	-0.025823	-0.046856	-0.08068	-0.021564	0.010052
0.011702	-0.0072422	0.029781	0.033917	0.10065	0.11515	0.11051	0.12428	0.22627	0.34821	1	0.35716	0.1766	0.087193	0.085504	0.080712	0.050003	0.032565	-0.0097224	-0.025265	-0.059101	-0.066919	-0.047195	-0.060576	-0.10748	-0.097694	-0.1063	-0.079936	-0.15351	-0.14205	-0.092084	-0.041057	-0.063571	-0.074554	-0.086231	-0.1001	-0.093883	-0.049266	-0.093996	-0.084098	-0.10672	-0.056887	-0.065354	-0.092644	-0.036547	-0.072448	-0.066762	-0.072468	-0.0077492	0.030931
-0.000555	0.029323	0.047339	0.054994	0.063615	0.14766	0.12733	0.1653	0.3238	1	0.34821	0.23693	0.15213	0.15956	0.09777	0.11593	0.028801	0.0035142	-0.025969	-0.017678	-0.053774	-0.097226	-0.10285	-0.11008	-0.16295	-0.12913	-0.13994	-0.1484	-0.12342	-0.081723	-0.057385	-0.021817	-0.070642	-0.08074	-0.12286	-0.072542	-0.053946	-0.068447	-0.055881	-0.052208	-0.093229	-0.0020642	-0.016922	-0.063283	-0.020254	-0.041579	-0.034008	-0.012776	-0.001145	0.029824
0.027264	0.032267	0.035017	0.037828	0.055332	0.12022	0.17793	0.3349	1	0.3238	0.22627	0.19343	0.15783	0.11407	0.084621	0.091916	0.04409	0.048431	-0.0095436	-0.006601	-0.03437	-0.088491	-0.11225	-0.099426	-0.17325	-0.10747	-0.12161	-0.10943	-0.090587	-0.061667	-0.04975	-0.027391	-0.05556	-0.038502	-0.080686	-0.075343	-0.052092	-0.088291	-0.063915	-0.057086	-0.053296	-0.039402	-0.039097	-0.085085	0.0050217	0.03158	0.030334	0.00025239	-0.034688	-0.038495
0.0807	0.068642	0.057175	0.10654	0.090263	0.19367	0.33943	1	0.3349	0.1653	0.12428	0.10455	0.12457	0.031697	0.013137	0.0080119	-0.029856	-0.013566	-0.038449	-0.066244	-0.087258	-0.14611	-0.15581	-0.16817	-0.16464	-0.12343	-0.17299	-0.11963	-0.036598	-0.026141	-0.068536	-0.063874	-0.094843	-0.07587	0.011341	-0.006079	-0.038	-0.034593	-0.023047	0.028639	-0.0092038	0.035211	0.027723	-0.0064834	0.021031	0.04655	0.087768	0.023162	0.024488	0.019984
0.074687	0.087537	0.066313	0.11256	0.11262	0.30297	1	0.33943	0.17793	0.12733	0.11051	0.080491	0.071097	0.0097771	-0.0059444	-0.058444	-0.074877	-0.047855	-0.033662	-0.11022	-0.1514	-0.17421	-0.18833	-0.15336	-0.18916	-0.16314	-0.17547	-0.14739	-0.12194	-0.05258	-0.084777	-0.058095	-0.06628	-0.050208	-0.036905	-0.02647	-0.05775	-0.0088853	-0.067653	-0.064738	-0.029315	0.068036	0.0096676	-0.01888	0.0095771	0.058156	0.062017	-0.0089526	0.063586	0.0066185
0.057753	0.077009	0.11725	0.15034	0.2297	1	0.30297	0.19367	0.12022	0.14766	0.11515	0.1087	0.13284	0.072889	-0.011279	-0.050657	-0.086979	-0.03814	-0.038567	-0.054911	-0.08404	-0.10299	-0.13857	-0.13612	-0.16312	-0.078054	-0.12486	-0.11023	-0.074003	-0.054846	-0.077276	-0.088851	-0.087857	-0.084775	-0.053996	-0.055543	-0.01488	-0.030751	-0.094171	-0.066099	0.010602	0.013749	-0.048441	-0.034746	-0.0063388	0.014513	0.023285	-0.0054406	0.019278	0.0089897
0.031048	0.010945	0.092771	0.29106	1	0.2297	0.11262	0.090263	0.055332	0.063615	0.10065	0.03581	0.022467	0.038527	-0.0082525	-0.043082	-0.037019	-0.013934	-0.0093562	-0.014698	-0.066643	-0.078561	-0.047507	-0.07703	-0.080543	-0.089219	-0.16408	-0.15109	-0.098001	-0.14785	-0.12263	-0.038295	-0.12957	-0.1026	-0.060614	-0.01442	-0.094241	-0.055805	0.016018	-0.037384	-0.0035164	-0.028805	-0.027671	-0.032176	0.012235	0.0384	0.05865	0.074745	0.028775	0.054305
0.11676	0.15878	0.31813	1	0.29106	0.15034	0.11256	0.10654	0.037828	0.054994	0.033917	0.038836	0.014259	-0.01834	-0.088257	-0.037873	-0.018563	-0.0077928	-0.051731	-0.073672	-0.080826	-0.093306	-0.11008	-0.12068	-0.1064	-0.11241	-0.14601	-0.19613	-0.12082	-0.095118	0.0042056	-0.055864	-0.11143	-0.067348	-0.035895	-0.010228	-0.002383	0.0076403	-0.026021	-0.034231	-0.043963	-0.0087895	-0.088294	0.014562	0.046416	0.066811	0.08206	0.041494	0.081824	0.020071
0.19601	0.30973	1	0.31813	0.092771	0.11725	0.066313	0.057175	0.035017	0.047339	0.029781	-0.021747	-0.042797	-0.049524	-0.10453	-0.048033	-0.073095	-0.096975	-0.11287	-0.16172	-0.15164	-0.1549	-0.19455	-0.17542	-0.1966	-0.18598	-0.21569	-0.13896	-0.10684	-0.029887	-0.024273	-0.065889	-0.049797	-0.040546	-0.046116	-0.053069	0.010958	0.063647	0.031187	-0.024109	-0.048499	-0.052922	-0.04838	-0.0058606	0.017996	-0.001553	0.044138	0.084563	0.058025	-0.019144
0.32189	1	0.30973	0.15878	0.010945	0.077009	0.087537	0.068642	0.032267	0.029323	-0.0072422	-0.03223	-0.017251	-0.026308	-0.041363	-0.079982	-0.071254	-0.082175	-0.095453	-0.14732	-0.10837	-0.13553	-0.1513	-0.15133	-0.13262	-0.16463	-0.12948	-0.13335	-0.056548	-0.0013667	0.0086043	-0.031763	-0.018896	-0.036279	-0.024825	-0.014188	0.00045006	0.0076571	-0.058034	-0.069177	-0.073519	-0.054731	-0.02606	-0.04759	0.0021899	0.02783	0.029017	0.0536	0.063477	0.03929
1	0.32189	0.19601	0.11676	0.031048	0.057753	0.074687	0.0807	0.027264	-0.000555	0.011702	0.00046988	-0.01346	-0.065059	-0.050209	-0.012525	-0.028736	-0.06361	-0.039706	-0.094414	-0.03745	-0.0822	-0.085597	-0.10144	-0.12092	-0.13015	-0.14934	-0.11591	-0.068583	-0.0092781	-0.023707	-0.090994	-0.091347	-0.075276	-0.0638	-0.038378	-0.034281	-0.0036248	-0.080603	-0.044991	-0.047324	-0.03802	-0.042367	-0.047432	-0.030129	0.031822	0.046316	0.040973	0.025954	-0.046462
[truncated: 11 more columns]

## Sheet: Figure3_supplement3D
0.026114	0.01399	0.019861	-0.0043642	-0.033019	-0.068223	-0.070491	0.0067108	-0.012032	-0.017703	0.025033	0.019748	0.014644	-0.001879	0.042493	0.077654	0.020151	-0.021358	-0.019726	0.012282	-0.040144	0.0091489	0.02584	-0.021824	-0.063137	-0.08741	-0.082787	-0.048328	-0.060039	-0.11235	-0.10856	-0.10681	-0.08779	-0.06797	-0.061391	-0.05931	-0.067407	0.011494	0.024297	-0.06529	-0.05701	0.0028083	0.057898	0.055589	0.035691	0.03064	0.071207	-0.00068533	-0.035274	0.025862
0.059698	0.043113	0.055459	0.0030315	0.046498	-0.047382	-0.08819	-0.023777	0.037862	0.030175	0.034745	-0.0050763	-0.026655	0.024925	0.0065551	0.066084	0.018013	-0.005942	0.042874	-0.0048506	0.02325	-0.010718	0.041894	-0.038093	-0.075042	-0.068033	-0.047394	-0.089203	-0.089482	-0.08006	-0.065512	-0.088603	-0.099841	-0.083557	-0.059781	-0.061588	-0.078546	-0.069764	-0.044407	-0.068301	-0.069527	-0.061003	0.020608	-0.019925	-0.003638	-0.022432	0.009345	-0.0040637	-0.01439	0.016508
0.092389	0.072946	0.098522	0.016278	0.034869	-0.018229	-0.023766	0.036654	0.070045	0.030016	0.016972	0.052785	-0.0207	0.045471	0.0070159	0.082004	0.017105	-0.017128	-0.01792	-0.0030831	0.0026242	0.012544	-0.034933	-0.12074	-0.1305	-0.1431	-0.12864	-0.16492	-0.18421	-0.18518	-0.078603	-0.083366	-0.117	-0.1216	-0.075144	-0.053687	-0.1013	-0.090619	-0.16457	-0.13739	-0.13336	-0.045549	-0.003138	0.026583	0.0059771	0.01647	0.056429	0.066823	0.057486	0.054121
0.023042	0.040899	0.031385	0.0098683	0.030528	-0.0062995	-0.018479	-0.016674	0.024835	0.034305	-0.016308	0.025267	0.023573	0.06918	-0.017223	-0.024388	0.021523	-0.10685	-0.050656	-0.048283	-0.030941	-0.055184	-0.076788	-0.13171	-0.13985	-0.12679	-0.11688	-0.14202	-0.16433	-0.15907	-0.10329	-0.068909	-0.081224	-0.082267	-0.090499	-0.080891	-0.095157	-0.089921	-0.098484	-0.085049	-0.071925	-0.072032	-0.049331	-0.025685	-0.006953	-0.030483	0.058381	0.076409	0.05025	0.019113
-0.024451	-0.044535	-0.0042371	-0.047606	-0.039406	-0.023265	0.01621	-0.0047301	0.033145	0.03149	-0.0092285	-0.016937	0.079799	0.068116	0.038401	-0.020516	-0.028972	-0.012001	-0.052265	-0.02012	-0.052004	-0.053647	-0.1243	-0.18381	-0.13167	-0.13428	-0.15216	-0.14517	-0.13295	-0.11868	-0.070961	-0.041347	-0.047207	-0.059648	-0.08738	-0.062626	0.0036044	0.031848	-0.041981	-0.019199	-0.015536	0.031984	0.00055872	-0.013697	0.060179	0.077067	0.068191	0.041901	0.044371	-0.022404
-0.0073213	-0.07976	-0.014564	-0.021502	-0.0011377	0.030969	0.020379	0.012504	0.079596	-0.011853	-0.072115	-0.052193	0.030159	0.074434	-0.0078555	-0.028904	0.01459	-0.040304	-0.021578	-0.029678	-0.062531	-0.079553	-0.10531	-0.15454	-0.13005	-0.12444	-0.12248	-0.1083	-0.064216	-0.093355	-0.030005	-0.0077958	-0.019367	-0.026033	-0.046538	-0.001893	-0.0041219	0.0048766	-0.013713	-0.012775	0.021999	0.043474	0.020941	0.044659	0.053788	0.058089	0.049654	0.052978	0.057551	0.079711
-0.0020495	0.0075795	-0.0095979	-0.046956	-0.013674	0.071863	0.065823	0.02931	0.084667	0.050899	0.00058703	0.020964	0.0017094	-0.020294	-0.062349	-0.050261	-0.034214	-0.056601	-0.052254	-0.046106	-0.065391	-0.08204	-0.11712	-0.11203	-0.12941	-0.10841	-0.10218	-0.10118	-0.082807	-0.046576	0.0081876	-0.034474	-0.015216	-0.010132	-0.001814	0.035152	-0.016576	-0.011054	-0.004249	0.04667	0.019118	-0.026262	0.016774	0.0091871	0.011388	0.001083	0.023996	0.04755	0.091552	0.084993
-0.055948	-0.0082439	-0.030455	-0.025755	-0.010501	0.039472	0.058769	0.040758	0.025616	0.0039454	0.0024149	0.027688	0.021574	0.0062198	0.00012992	-0.038918	0.016369	-0.044005	-0.019999	-0.032472	-0.03279	-0.02628	-0.055093	-0.096091	-0.11919	-0.10545	-0.069091	-0.12486	-0.10851	-0.10689	-0.070044	-0.046234	-0.12093	-0.090617	-0.017829	-0.0012228	-0.057777	-0.05086	-0.036689	0.02647	0.010621	0.0032609	0.038688	0.0079698	0.045576	0.053798	-0.0065382	0.056329	0.1147	0.024369
0.0012903	-0.00034146	-0.017583	-0.040309	-0.0046493	0.020903	0.03407	0.064575	0.057451	0.08732	0.059084	0.0019522	-0.048785	-0.019244	-0.039312	-0.038659	-0.016864	0.027684	0.0072253	-0.028764	-0.092402	-0.090484	-0.079094	-0.11053	-0.11564	-0.079457	-0.10304	-0.10222	-0.084673	-0.093357	-0.06796	-0.13109	-0.13603	-0.071477	0.0039428	0.040522	0.030014	-0.046095	0.0077222	0.011054	0.040817	0.013861	0.021831	0.0049822	-0.028465	-0.032186	0.03818	0.033025	-0.020375	0.04976
-0.025364	-0.018343	-0.028428	-0.060645	-0.0027603	0.0045241	-0.014443	0.025143	-0.0017633	0.048554	0.0071389	-0.062262	-0.04467	-0.042375	-0.089341	-0.048103	-0.064258	-0.080742	-0.036905	-0.02774	-0.044243	0.0059861	-0.076927	-0.043983	-0.041633	-0.032114	-0.056835	-0.018164	0.029353	0.00064998	-0.026975	-0.11424	-0.078856	-0.023889	0.01228	0.0698	-0.010337	0.019334	0.0052383	0.039973	0.037998	0.018498	-0.055695	-0.0015003	-0.0014189	0.052132	0.060135	-0.029834	0.026152	0.12673
-0.083162	-0.061689	-0.032739	-0.046402	0.029734	0.03825	0.0086928	-0.073285	-0.071974	-0.083729	-0.074185	-0.094941	0.01111	-0.022848	-0.066385	-0.065386	-0.054664	-0.11132	-0.0225	-0.021093	-0.020821	-0.051677	-0.052771	-0.068383	-0.038659	-0.038718	-0.02761	-0.010766	0.004934	-0.0070929	-0.015561	-0.065448	-0.044933	0.013892	0.005366	0.046235	0.065959	0.052404	0.099247	0.062836	0.034129	9.2765e-05	-0.029592	0.0048056	0.030624	0.082826	0.085595	0.1011	0.1529	0.3205
-0.073715	-0.078775	-0.030723	-0.024349	0.051578	0.019113	-0.020188	-0.014032	-0.013831	-0.0038336	-0.02225	-0.016079	0.059555	-0.030602	-0.0090672	0.002238	-0.0036068	-0.033361	-0.055066	-0.048482	-0.064578	-0.04702	-0.027223	-0.076251	-0.077609	-0.080236	-0.074347	-0.048418	-0.05621	-0.012628	-0.031202	-0.051815	-0.036732	-0.024276	0.0008262	0.051471	0.04083	0.020856	0.06587	0.074713	-0.027046	-0.033802	-0.0045327	0.0037444	0.065122	0.11527	0.12636	0.18186	0.31357	1
-0.082745	-0.066336	-0.021546	-0.031873	-0.013815	-0.01534	0.05141	0.025117	0.035134	0.0096024	-0.0020338	-0.039594	0.033287	0.038703	-0.012779	0.017682	-0.014697	-0.07755	-0.089255	-0.097703	-0.041452	-0.0075242	-0.055855	-0.058608	-0.079429	-0.10169	-0.062091	-0.080236	-0.062111	-0.043821	-0.052023	-0.055369	-0.10433	-0.073374	0.0016298	0.016824	-0.01609	0.077263	0.010958	0.023221	0.021936	0.048549	-0.011336	0.064135	0.085464	0.073936	0.092592	0.26222	1	0.31357
-0.063246	0.0026927	-0.0016333	-0.010124	-0.019671	-0.013822	-0.028267	0.010969	0.0059292	0.038662	-0.0062235	-0.053679	-0.018196	0.055792	0.0079975	0.0085523	0.038233	-0.033168	-0.05081	-0.11125	-0.058662	-0.07171	-0.034226	-0.067344	-0.10859	-0.11767	-0.082156	-0.097597	-0.1039	-0.12318	-0.097907	-0.07908	-0.10094	-0.040267	0.0081862	-0.016419	0.030121	0.076424	0.077485	0.050489	0.040406	0.051619	0.075446	0.11739	0.075271	0.12667	0.23729	1	0.26222	0.18186
-0.013466	-0.024692	0.014146	-0.066961	-0.0052059	-0.015695	-0.0086428	-0.026858	0.045362	0.044654	0.020203	-0.050638	0.048826	0.06371	0.019806	0.016059	-0.015618	-0.049523	0.010468	-0.066072	-0.076061	-0.087124	-0.082322	-0.13868	-0.18659	-0.16084	-0.15441	-0.1477	-0.12767	-0.12041	-0.071277	-0.074182	-0.045388	-0.063672	-0.0052741	-0.00036202	0.032725	0.0023168	0.017816	0.025266	0.058159	0.071832	0.11827	0.15555	0.14627	0.32849	1	0.23729	0.092592	0.12636
0.01078	-0.041751	-0.020122	-0.033767	-0.023608	-0.0029267	-0.026702	-0.030897	-0.026474	0.020918	-0.085518	-0.057056	0.024013	0.015068	0.036844	0.030002	-0.013785	-0.031556	-0.014548	-0.0080955	-0.030539	-0.057502	-0.087576	-0.089306	-0.11655	-0.090974	-0.10423	-0.061009	-0.026439	-0.054482	-0.032158	0.0013034	0.025114	-0.011145	0.030392	0.010371	0.0046494	0.082954	0.054215	0.044607	0.10418	0.12136	0.16214	0.18172	0.28307	1	0.32849	0.12667	0.073936	0.11527
-0.11105	-0.14014	-0.033293	-0.039055	-0.10214	-0.038484	-0.088137	-0.11106	-0.060724	-0.065139	-0.055128	-0.073818	-0.031524	-0.069547	-0.028304	-0.038598	-0.021612	-0.11628	-0.095624	-0.05406	-0.078898	-0.052415	-0.043162	-0.022063	-0.020764	-0.02727	-0.016315	0.0021009	0.03778	0.055393	0.057935	0.11539	0.11569	0.10674	0.09099	0.074647	0.082388	0.077084	0.12812	0.093977	0.13159	0.10287	0.12468	0.31243	1	0.28307	0.14627	0.075271	0.085464	0.065122
-0.051025	-0.04704	0.00044469	-0.014734	-0.074346	-0.023299	-0.078689	-0.022479	-0.052428	-0.028321	-0.075577	-0.03416	-0.058131	-0.02179	-0.0045838	0.0066612	0.022049	-0.043856	-0.045025	-0.01452	-0.041419	-0.042158	-0.070151	-0.072928	-0.1056	-0.11949	-0.09296	-0.056217	-0.014954	0.0078929	0.011317	0.08861	0.083734	0.082416	0.10695	0.09993	0.10736	0.086347	0.11697	0.052004	0.061135	0.16508	0.34602	1	0.31243	0.18172	0.15555	0.11739	0.064135	0.0037444
-0.038384	-0.017791	-0.025412	-0.069564	-0.061808	-0.039893	-0.015471	0.019504	-0.009395	-0.0066142	-0.030115	-0.030018	0.018346	-0.0021077	0.079426	0.07106	0.033154	-0.05436	-0.058945	0.015331	-0.030345	-0.084756	-0.10189	-0.094122	-0.12718	-0.12144	-0.11621	-0.097185	-0.072889	-0.033764	-0.0073197	0.069563	0.035505	0.036946	0.042527	0.07796	0.05904	0.064927	0.041982	0.046903	0.12983	0.31519	1	0.34602	0.12468	0.16214	0.11827	0.075446	-0.011336	-0.0045327
-0.054702	-0.0071221	0.023154	-0.090965	-0.064831	-0.051538	0.020725	-0.034362	0.020316	-0.012818	-0.070002	-0.044962	0.0011436	0.031408	0.020293	-0.027074	-0.077157	-0.095146	-0.037065	-0.078696	-0.049021	-0.063217	-0.10929	-0.087162	-0.065116	-0.050921	-0.062049	-0.067816	-0.018028	0.0021614	0.02295	0.045425	0.040826	0.053054	0.086751	0.12722	0.12637	0.087573	0.080688	0.12971	0.28855	1	0.31519	0.16508	0.10287	0.12136	0.071832	0.051619	0.048549	-0.033802
-0.071882	-0.068125	-0.059359	-0.11098	-0.088663	-0.050963	-0.036467	-0.12818	-0.052179	-0.027525	-0.054471	-0.089346	-0.012088	-0.029832	-0.033817	-0.10678	-0.11114	-0.1049	-0.11676	-0.098586	-0.080256	-0.060016	-0.011373	-0.04487	-0.023479	-0.0048399	0.012261	0.021868	0.051668	0.083945	0.11753	0.096778	0.096029	0.14312	0.14848	0.17951	0.19423	0.1303	0.18619	0.3453	1	0.28855	0.12983	0.061135	0.13159	0.10418	0.058159	0.040406	0.021936	-0.027046
-0.12002	-0.038993	-0.052845	-0.084553	-0.10051	-0.069167	-0.078353	-0.1571	-0.094322	-0.096986	-0.081121	-0.095667	-0.027577	-0.087317	-0.091637	-0.10803	-0.08985	-0.11755	-0.094687	-0.087543	-0.067124	-0.077451	0.030411	0.067979	0.091759	0.14364	0.11455	0.14175	0.14995	0.17723	0.17712	0.1641	0.17844	0.21756	0.19663	0.20047	0.22672	0.18691	0.35128	1	0.3453	0.12971	0.046903	0.052004	0.093977	0.044607	0.025266	0.050489	0.023221	0.074713
-0.11207	-0.073287	-0.02671	-0.037645	-0.081813	-0.084785	-0.1365	-0.10528	-0.13116	-0.11552	-0.051161	-0.089353	-0.074781	-0.15357	-0.12819	-0.12992	-0.089937	-0.096883	-0.10668	-0.0097586	-0.016683	0.034626	0.089139	0.10306	0.11532	0.13812	0.15388	0.15539	0.14473	0.19639	0.1545	0.14134	0.12435	0.20636	0.18902	0.19664	0.25075	0.35067	1	0.35128	0.18619	0.080688	0.041982	0.11697	0.12812	0.054215	0.017816	0.077485	0.010958	0.06587
-0.14581	-0.11056	-0.07905	-0.13992	-0.15803	-0.16477	-0.13062	-0.087903	-0.052178	-0.060921	-0.027715	-0.080275	-0.069713	-0.14713	-0.079338	-0.036669	-0.13808	-0.075978	-0.060929	-0.0033052	-0.028592	0.1445	0.12492	0.10483	0.10181	0.11525	0.12092	0.14072	0.17177	0.154	0.17427	0.17432	0.15202	0.18537	0.19476	0.22301	0.35704	1	0.35067	0.18691	0.1303	0.087573	0.064927	0.086347	0.077084	0.082954	0.0023168	0.076424	0.077263	0.020856
-0.11446	-0.069507	-0.068346	-0.096078	-0.11549	-0.087892	-0.13027	-0.12711	-0.057631	-0.14298	-0.049568	-0.091803	-0.067232	-0.11709	-0.07236	-0.077012	-0.078088	-0.024405	-0.073455	-0.0088401	-0.015218	0.00070944	0.02027	0.046588	0.053679	0.056945	0.085227	0.093346	0.11606	0.15869	0.17036	0.19224	0.19104	0.2071	0.25471	0.38774	1	0.35704	0.25075	0.22672	0.19423	0.12637	0.05904	0.10736	0.082388	0.0046494	0.032725	0.030121	-0.01609	0.04083
-0.14279	-0.11412	-0.086842	-0.11045	-0.11223	-0.10807	-0.13255	-0.15321	-0.10378	-0.1019	-0.090098	-0.099986	-0.088211	-0.098921	-0.12666	-0.097725	-0.093485	-0.08285	-0.086055	-0.05215	-0.028957	0.012796	0.015928	0.010418	0.05436	0.076779	0.1071	0.12345	0.17533	0.2347	0.26609	0.26583	0.25365	0.28806	0.43628	1	0.38774	0.22301	0.19664	0.20047	0.17951	0.12722	0.07796	0.09993	0.074647	0.010371	-0.00036202	-0.016419	0.016824	0.051471
-0.16189	-0.11307	-0.077029	-0.049863	-0.10149	-0.10577	-0.16182	-0.1528	-0.1017	-0.12266	-0.1596	-0.10278	-0.087693	-0.11728	-0.1132	-0.093469	-0.11542	-0.079332	-0.021303	-0.048616	-0.066451	-0.0095628	0.047145	0.058914	0.064566	0.054625	0.1423	0.15898	0.19297	0.27262	0.2688	0.27626	0.32606	0.45873	1	0.43628	0.25471	0.19476	0.18902	0.19663	0.14848	0.086751	0.042527	0.10695	0.09099	0.030392	-0.0052741	0.0081862	0.0016298	0.0008262
-0.14563	-0.13834	-0.10714	-0.081217	-0.11126	-0.10258	-0.17866	-0.19027	-0.10756	-0.15959	-0.13194	-0.15631	-0.13608	-0.13859	-0.14715	-0.16776	-0.14604	-0.097728	-0.029988	-0.050366	-0.08383	-0.050059	0.039233	0.085664	0.13435	0.14612	0.1982	0.20909	0.2581	0.32931	0.34726	0.38124	0.50913	1	0.45873	0.28806	0.2071	0.18537	0.20636	0.21756	0.14312	0.053054	0.036946	0.082416	0.10674	-0.011145	-0.063672	-0.040267	-0.073374	-0.024276
-0.15112	-0.12099	-0.096223	-0.093498	-0.15715	-0.10429	-0.21875	-0.19769	-0.12311	-0.16175	-0.15493	-0.17925	-0.1334	-0.12981	-0.1131	-0.078324	-0.064037	-0.070267	-0.076773	-0.066269	-0.050972	-0.049595	-0.0011934	0.090305	0.13782	0.18541	0.25816	0.24846	0.25156	0.35358	0.38266	0.49881	1	0.50913	0.32606	0.25365	0.19104	0.15202	0.12435	0.17844	0.096029	0.040826	0.035505	0.083734	0.11569	0.025114	-0.045388	-0.10094	-0.10433	-0.036732
-0.19828	-0.16445	-0.13865	-0.11529	-0.19368	-0.15963	-0.19636	-0.19929	-0.20218	-0.18382	-0.11559	-0.14961	-0.13322	-0.15406	-0.1477	-0.09926	-0.10449	-0.10745	-0.1033	-0.090916	-0.044514	-0.019128	0.060432	0.16756	0.19157	0.25742	0.31037	0.30061	0.32218	0.43814	0.4918	1	0.49881	0.38124	0.27626	0.26583	0.19224	0.17432	0.14134	0.1641	0.096778	0.045425	0.069563	0.08861	0.11539	0.0013034	-0.074182	-0.07908	-0.055369	-0.051815
-0.2155	-0.20709	-0.16587	-0.16342	-0.22031	-0.15382	-0.17898	-0.20446	-0.16963	-0.19311	-0.201	-0.23569	-0.17744	-0.1362	-0.19097	-0.17143	-0.12959	-0.10102	-0.085908	-0.085662	-0.0080618	0.018419	0.14488	0.24126	0.32625	0.39648	0.39275	0.41614	0.44893	0.55704	1	0.4918	0.38266	0.34726	0.2688	0.26609	0.17036	0.17427	0.1545	0.17712	0.11753	0.02295	-0.0073197	0.011317	0.057935	-0.032158	-0.071277	-0.097907	-0.052023	-0.031202
-0.21304	-0.23051	-0.20663	-0.17266	-0.22073	-0.16558	-0.21088	-0.23305	-0.2364	-0.15185	-0.166	-0.23624	-0.21456	-0.19967	-0.18868	-0.17123	-0.15215	-0.15323	-0.16381	-0.10156	-0.035982	0.096843	0.21522	0.34859	0.42273	0.47007	0.4954	0.51119	0.60388	1	0.55704	0.43814	0.35358	0.32931	0.27262	0.2347	0.15869	0.154	0.19639	0.17723	0.083945	0.0021614	-0.033764	0.0078929	0.055393	-0.054482	-0.12041	-0.12318	-0.043821	-0.012628
-0.22456	-0.206	-0.23038	-0.19663	-0.22288	-0.18577	-0.21981	-0.21842	-0.2343	-0.15662	-0.1587	-0.2415	-0.2332	-0.2224	-0.18697	-0.14354	-0.15183	-0.13451	-0.11629	-0.047585	-0.0097589	0.13675	0.29409	0.46271	0.55924	0.59327	0.58467	0.66475	1	0.60388	0.44893	0.32218	0.25156	0.2581	0.19297	0.17533	0.11606	0.17177	0.14473	0.14995	0.051668	-0.018028	-0.072889	-0.014954	0.03778	-0.026439	-0.12767	-0.1039	-0.062111	-0.05621
-0.19709	-0.17944	-0.21288	-0.15163	-0.22164	-0.19129	-0.23792	-0.24676	-0.2627	-0.22403	-0.17402	-0.21332	-0.21459	-0.19664	-0.17616	-0.12128	-0.17718	-0.14697	-0.12347	-0.017228	0.04005	0.1749	0.31555	0.52675	0.62694	0.67065	0.69897	1	0.66475	0.51119	0.41614	0.30061	0.24846	0.20909	0.15898	0.12345	0.093346	0.14072	0.15539	0.14175	0.021868	-0.067816	-0.097185	-0.056217	0.0021009	-0.061009	-0.1477	-0.097597	-0.080236	-0.048418
-0.2024	-0.1214	-0.18768	-0.1503	-0.20302	-0.21571	-0.23938	-0.25664	-0.2719	-0.25369	-0.17188	-0.24143	-0.25217	-0.23315	-0.17118	-0.1475	-0.15436	-0.1384	-0.077605	-0.0071185	0.091654	0.22581	0.36784	0.57104	0.662	0.74856	1	0.69897	0.58467	0.4954	0.39275	0.31037	0.25816	0.1982	0.1423	0.1071	0.085227	0.12092	0.15388	0.11455	0.012261	-0.062049	-0.11621	-0.09296	-0.016315	-0.10423	-0.15441	-0.082156	-0.062091	-0.074347
-0.18294	-0.13894	-0.19895	-0.17153	-0.22387	-0.19833	-0.19788	-0.28528	-0.28215	-0.22848	-0.16328	-0.20865	-0.233	-0.23528	-0.17929	-0.15887	-0.13966	-0.087674	-0.067835	0.0039717	0.11759	0.26658	0.43089	0.63514	0.75632	1	0.74856	0.67065	0.59327	0.47007	0.39648	0.25742	0.18541	0.14612	0.054625	0.076779	0.056945	0.11525	0.13812	0.14364	-0.0048399	-0.050921	-0.12144	-0.11949	-0.02727	-0.090974	-0.16084	-0.11767	-0.10169	-0.080236
-0.2032	-0.16487	-0.17898	-0.15351	-0.2082	-0.22012	-0.21371	-0.23302	-0.26481	-0.22504	-0.1606	-0.20002	-0.22075	-0.25542	-0.17862	-0.14019	-0.1211	-0.086496	-0.046753	0.0089403	0.12054	0.2998	0.50328	0.72311	1	0.75632	0.662	0.62694	0.55924	0.42273	0.32625	0.19157	0.13782	0.13435	0.064566	0.05436	0.053679	0.10181	0.11532	0.091759	-0.023479	-0.065116	-0.12718	-0.1056	-0.020764	-0.11655	-0.18659	-0.10859	-0.079429	-0.077609
-0.20542	-0.15694	-0.20414	-0.1107	-0.20609	-0.19219	-0.22498	-0.19235	-0.23881	-0.21911	-0.12798	-0.18361	-0.21315	-0.20755	-0.14834	-0.072624	-0.082289	-0.053658	-0.061856	0.069539	0.14418	0.32846	0.60938	1	0.72311	0.63514	0.57104	0.52675	0.46271	0.34859	0.24126	0.16756	0.090305	0.085664	0.058914	0.010418	0.046588	0.10483	0.10306	0.067979	-0.04487	-0.087162	-0.094122	-0.072928	-0.022063	-0.089306	-0.13868	-0.067344	-0.058608	-0.076251
-0.17963	-0.15696	-0.11915	-0.077788	-0.13096	-0.16151	-0.18485	-0.19746	-0.18343	-0.16021	-0.15177	-0.11107	-0.14147	-0.16612	-0.061157	-0.015698	-0.045685	0.011966	0.019627	0.11394	0.20056	0.48027	1	0.60938	0.50328	0.43089	0.36784	0.31555	0.29409	0.21522	0.14488	0.060432	-0.0011934	0.039233	0.047145	0.015928	0.02027	0.12492	0.089139	0.030411	-0.011373	-0.10929	-0.10189	-0.070151	-0.043162	-0.087576	-0.082322	-0.034226	-0.055855	-0.027223
-0.13353	-0.087177	-0.038075	-0.078852	-0.097841	-0.16138	-0.091433	-0.071219	-0.11286	-0.079368	-0.083893	-0.058405	-0.062297	-0.087294	0.018027	-0.0034525	0.0165	0.077357	0.077335	0.21444	0.37957	1	0.48027	0.32846	0.2998	0.26658	0.22581	0.1749	0.13675	0.096843	0.018419	-0.019128	-0.049595	-0.050059	-0.0095628	0.012796	0.00070944	0.1445	0.034626	-0.077451	-0.060016	-0.063217	-0.084756	-0.042158	-0.052415	-0.057502	-0.087124	-0.07171	-0.0075242	-0.04702
-0.03386	-0.0017803	-0.024566	-0.0036376	-0.041528	-0.059842	-0.040302	-0.0594	-0.080935	-0.049793	-0.037692	-0.055602	-0.043545	0.027248	0.039788	0.060353	0.079093	0.14324	0.16929	0.29982	1	0.37957	0.20056	0.14418	0.12054	0.11759	0.091654	0.04005	-0.0097589	-0.035982	-0.0080618	-0.044514	-0.050972	-0.08383	-0.066451	-0.028957	-0.015218	-0.028592	-0.016683	-0.067124	-0.080256	-0.049021	-0.030345	-0.041419	-0.078898	-0.030539	-0.076061	-0.058662	-0.041452	-0.064578
0.029336	0.031057	-0.036966	0.017388	0.01445	0.0050464	-0.00052095	0.030957	0.013764	-0.039232	-0.045582	0.033754	0.048699	0.036778	0.12861	0.072692	0.10551	0.17924	0.30355	1	0.29982	0.21444	0.11394	0.069539	0.0089403	0.0039717	-0.0071185	-0.017228	-0.047585	-0.10156	-0.085662	-0.090916	-0.066269	-0.050366	-0.048616	-0.05215	-0.0088401	-0.0033052	-0.0097586	-0.087543	-0.098586	-0.078696	0.015331	-0.01452	-0.05406	-0.0080955	-0.066072	-0.11125	-0.097703	-0.048482
0.06002	0.067042	0.07408	0.011406	0.048175	0.02924	0.060394	0.061411	0.076628	0.030322	-0.037497	0.082001	0.071063	0.14839	0.12167	0.098131	0.19003	0.33077	1	0.30355	0.16929	0.077335	0.019627	-0.061856	-0.046753	-0.067835	-0.077605	-0.12347	-0.11629	-0.16381	-0.085908	-0.1033	-0.076773	-0.029988	-0.021303	-0.086055	-0.073455	-0.060929	-0.10668	-0.094687	-0.11676	-0.037065	-0.058945	-0.045025	-0.095624	-0.014548	0.010468	-0.05081	-0.089255	-0.055066
0.069758	0.029745	0.005983	0.037536	0.041175	0.02454	0.070047	0.12493	0.10788	0.095672	0.08799	0.095186	0.082295	0.12218	0.13232	0.12638	0.32596	1	0.33077	0.17924	0.14324	0.077357	0.011966	-0.053658	-0.086496	-0.087674	-0.1384	-0.14697	-0.13451	-0.15323	-0.10102	-0.10745	-0.070267	-0.097728	-0.079332	-0.08285	-0.024405	-0.075978	-0.096883	-0.11755	-0.1049	-0.095146	-0.05436	-0.043856	-0.11628	-0.031556	-0.049523	-0.033168	-0.07755	-0.033361
0.034006	0.024617	-0.0029466	0.053116	0.036976	0.042989	0.038906	0.097152	0.085722	0.10641	0.075511	0.11238	0.089271	0.12723	0.16742	0.25394	1	0.32596	0.19003	0.10551	0.079093	0.0165	-0.045685	-0.082289	-0.1211	-0.13966	-0.15436	-0.17718	-0.15183	-0.15215	-0.12959	-0.10449	-0.064037	-0.14604	-0.11542	-0.093485	-0.078088	-0.13808	-0.089937	-0.08985	-0.11114	-0.077157	0.033154	0.022049	-0.021612	-0.013785	-0.015618	0.038233	-0.014697	-0.0036068
0.098358	0.087351	0.016255	0.077295	0.060184	0.04488	0.051502	0.10134	0.061691	0.061259	0.043082	0.055382	0.12091	0.16549	0.31102	1	0.25394	0.12638	0.098131	0.072692	0.060353	-0.0034525	-0.015698	-0.072624	-0.14019	-0.15887	-0.1475	-0.12128	-0.14354	-0.17123	-0.17143	-0.09926	-0.078324	-0.16776	-0.093469	-0.097725	-0.077012	-0.036669	-0.12992	-0.10803	-0.10678	-0.027074	0.07106	0.0066612	-0.038598	0.030002	0.016059	0.0085523	0.017682	0.002238
0.14189	0.06245	0.022461	0.066377	0.1301	0.086017	0.076359	0.0899	0.077264	0.0013049	0.029639	0.099523	0.22414	0.33803	1	0.31102	0.16742	0.13232	0.12167	0.12861	0.039788	0.018027	-0.061157	-0.14834	-0.17862	-0.17929	-0.17118	-0.17616	-0.18697	-0.18868	-0.19097	-0.1477	-0.1131	-0.14715	-0.1132	-0.12666	-0.07236	-0.079338	-0.12819	-0.091637	-0.033817	0.020293	0.079426	-0.0045838	-0.028304	0.036844	0.019806	0.0079975	-0.012779	-0.0090672
0.16905	0.040686	0.04068	0.023885	0.10599	0.07332	0.082488	0.12671	0.12188	0.0929	0.044462	0.12542	0.27489	1	0.33803	0.16549	0.12723	0.12218	0.14839	0.036778	0.027248	-0.087294	-0.16612	-0.20755	-0.25542	-0.23528	-0.23315	-0.19664	-0.2224	-0.19967	-0.1362	-0.15406	-0.12981	-0.13859	-0.11728	-0.098921	-0.11709	-0.14713	-0.15357	-0.087317	-0.029832	0.031408	-0.0021077	-0.02179	-0.069547	0.015068	0.06371	0.055792	0.038703	-0.030602
0.091389	0.0060662	0.04743	0.073771	0.19985	0.080758	0.11515	0.094809	0.10928	0.075067	0.096011	0.27656	1	0.27489	0.22414	0.12091	0.089271	0.082295	0.071063	0.048699	-0.043545	-0.062297	-0.14147	-0.21315	-0.22075	-0.233	-0.25217	-0.21459	-0.2332	-0.21456	-0.17744	-0.13322	-0.1334	-0.13608	-0.087693	-0.088211	-0.067232	-0.069713	-0.074781	-0.027577	-0.012088	0.0011436	0.018346	-0.058131	-0.031524	0.024013	0.048826	-0.018196	0.033287	0.059555
0.12181	0.095916	0.11452	0.10119	0.15202	0.076419	0.071728	0.12277	0.12	0.12847	0.26339	1	0.27656	0.12542	0.099523	0.055382	0.11238	0.095186	0.082001	0.033754	-0.055602	-0.058405	-0.11107	-0.18361	-0.20002	-0.20865	-0.24143	-0.21332	-0.2415	-0.23624	-0.23569	-0.14961	-0.17925	-0.15631	-0.10278	-0.099986	-0.091803	-0.080275	-0.089353	-0.095667	-0.089346	-0.044962	-0.030018	-0.03416	-0.073818	-0.057056	-0.050638	-0.053679	-0.039594	-0.016079
0.092923	0.053168	0.013269	0.097387	0.063849	0.04856	0.07385	0.18039	0.17076	0.27956	1	0.26339	0.096011	0.044462	0.029639	0.043082	0.075511	0.08799	-0.037497	-0.045582	-0.037692	-0.083893	-0.15177	-0.12798	-0.1606	-0.16328	-0.17188	-0.17402	-0.1587	-0.166	-0.201	-0.11559	-0.15493	-0.13194	-0.1596	-0.090098	-0.049568	-0.027715	-0.051161	-0.081121	-0.054471	-0.070002	-0.030115	-0.075577	-0.055128	-0.085518	0.020203	-0.0062235	-0.0020338	-0.02225
0.05817	0.051718	0.0096401	0.037124	0.061919	0.081901	0.13327	0.22326	0.33011	1	0.27956	0.12847	0.075067	0.0929	0.0013049	0.061259	0.10641	0.095672	0.030322	-0.039232	-0.049793	-0.079368	-0.16021	-0.21911	-0.22504	-0.22848	-0.25369	-0.22403	-0.15662	-0.15185	-0.19311	-0.18382	-0.16175	-0.15959	-0.12266	-0.1019	-0.14298	-0.060921	-0.11552	-0.096986	-0.027525	-0.012818	-0.0066142	-0.028321	-0.065139	0.020918	0.044654	0.038662	0.0096024	-0.0038336
0.14438	0.087502	0.0219	0.025764	0.071039	0.10278	0.18867	0.31049	1	0.33011	0.17076	0.12	0.10928	0.12188	0.077264	0.061691	0.085722	0.10788	0.076628	0.013764	-0.080935	-0.11286	-0.18343	-0.23881	-0.26481	-0.28215	-0.2719	-0.2627	-0.2343	-0.2364	-0.16963	-0.20218	-0.12311	-0.10756	-0.1017	-0.10378	-0.057631	-0.052178	-0.13116	-0.094322	-0.052179	0.020316	-0.009395	-0.052428	-0.060724	-0.026474	0.045362	0.0059292	0.035134	-0.013831
0.13172	0.12381	0.019561	0.049346	0.14108	0.14371	0.27172	1	0.31049	0.22326	0.18039	0.12277	0.094809	0.12671	0.0899	0.10134	0.097152	0.12493	0.061411	0.030957	-0.0594	-0.071219	-0.19746	-0.19235	-0.23302	-0.28528	-0.25664	-0.24676	-0.21842	-0.23305	-0.20446	-0.19929	-0.19769	-0.19027	-0.1528	-0.15321	-0.12711	-0.087903	-0.10528	-0.1571	-0.12818	-0.034362	0.019504	-0.022479	-0.11106	-0.030897	-0.026858	0.010969	0.025117	-0.014032
0.14691	0.099578	0.096591	0.011555	0.18908	0.31857	1	0.27172	0.18867	0.13327	0.07385	0.071728	0.11515	0.082488	0.076359	0.051502	0.038906	0.070047	0.060394	-0.00052095	-0.040302	-0.091433	-0.18485	-0.22498	-0.21371	-0.19788	-0.23938	-0.23792	-0.21981	-0.21088	-0.17898	-0.19636	-0.21875	-0.17866	-0.16182	-0.13255	-0.13027	-0.13062	-0.1365	-0.078353	-0.036467	0.020725	-0.015471	-0.078689	-0.088137	-0.026702	-0.0086428	-0.028267	0.05141	-0.020188
0.15499	0.08387	0.044232	0.10007	0.30421	1	0.31857	0.14371	0.10278	0.081901	0.04856	0.076419	0.080758	0.07332	0.086017	0.04488	0.042989	0.02454	0.02924	0.0050464	-0.059842	-0.16138	-0.16151	-0.19219	-0.22012	-0.19833	-0.21571	-0.19129	-0.18577	-0.16558	-0.15382	-0.15963	-0.10429	-0.10258	-0.10577	-0.10807	-0.087892	-0.16477	-0.084785	-0.069167	-0.050963	-0.051538	-0.039893	-0.023299	-0.038484	-0.0029267	-0.015695	-0.013822	-0.01534	0.019113
0.14656	0.091129	0.13983	0.27925	1	0.30421	0.18908	0.14108	0.071039	0.061919	0.063849	0.15202	0.19985	0.10599	0.1301	0.060184	0.036976	0.041175	0.048175	0.01445	-0.041528	-0.097841	-0.13096	-0.20609	-0.2082	-0.22387	-0.20302	-0.22164	-0.22288	-0.22073	-0.22031	-0.19368	-0.15715	-0.11126	-0.10149	-0.11223	-0.11549	-0.15803	-0.081813	-0.10051	-0.088663	-0.064831	-0.061808	-0.074346	-0.10214	-0.023608	-0.0052059	-0.019671	-0.013815	0.051578
0.081896	0.16974	0.23556	1	0.27925	0.10007	0.011555	0.049346	0.025764	0.037124	0.097387	0.10119	0.073771	0.023885	0.066377	0.077295	0.053116	0.037536	0.011406	0.017388	-0.0036376	-0.078852	-0.077788	-0.1107	-0.15351	-0.17153	-0.1503	-0.15163	-0.19663	-0.17266	-0.16342	-0.11529	-0.093498	-0.081217	-0.049863	-0.11045	-0.096078	-0.13992	-0.037645	-0.084553	-0.11098	-0.090965	-0.069564	-0.014734	-0.039055	-0.033767	-0.066961	-0.010124	-0.031873	-0.024349
0.1359	0.29795	1	0.23556	0.13983	0.044232	0.096591	0.019561	0.0219	0.0096401	0.013269	0.11452	0.04743	0.04068	0.022461	0.016255	-0.0029466	0.005983	0.07408	-0.036966	-0.024566	-0.038075	-0.11915	-0.20414	-0.17898	-0.19895	-0.18768	-0.21288	-0.23038	-0.20663	-0.16587	-0.13865	-0.096223	-0.10714	-0.077029	-0.086842	-0.068346	-0.07905	-0.02671	-0.052845	-0.059359	0.023154	-0.025412	0.00044469	-0.033293	-0.020122	0.014146	-0.0016333	-0.021546	-0.030723
0.3151	1	0.29795	0.16974	0.091129	0.08387	0.099578	0.12381	0.087502	0.051718	0.053168	0.095916	0.0060662	0.040686	0.06245	0.087351	0.024617	0.029745	0.067042	0.031057	-0.0017803	-0.087177	-0.15696	-0.15694	-0.16487	-0.13894	-0.1214	-0.17944	-0.206	-0.23051	-0.20709	-0.16445	-0.12099	-0.13834	-0.11307	-0.11412	-0.069507	-0.11056	-0.073287	-0.038993	-0.068125	-0.0071221	-0.017791	-0.04704	-0.14014	-0.041751	-0.024692	0.0026927	-0.066336	-0.078775
1	0.3151	0.1359	0.081896	0.14656	0.15499	0.14691	0.13172	0.14438	0.05817	0.092923	0.12181	0.091389	0.16905	0.14189	0.098358	0.034006	0.069758	0.06002	0.029336	-0.03386	-0.13353	-0.17963	-0.20542	-0.2032	-0.18294	-0.2024	-0.19709	-0.22456	-0.21304	-0.2155	-0.19828	-0.15112	-0.14563	-0.16189	-0.14279	-0.11446	-0.14581	-0.11207	-0.12002	-0.071882	-0.054702	-0.038384	-0.051025	-0.11105	0.01078	-0.013466	-0.063246	-0.082745	-0.073715
[truncated: 11 more columns]
