# Supplementary material for: A generalized cortical activity pattern at internally generated mental context boundaries during unguided narrative recall
Source: eLife. 2022 May 30;11:e73693. doi: 10.7554/eLife.73693 (PMC9177147; doi:10.7554/eLife.73693)
Supplement: Figure 3—source data 1. [file elife-73693-fig3-data1.xlsx]

## Sheet: Figure3A
			Encoding																							Recall
			Offset										Middle										Offset										Middle
			Movie 1	Movie 2	Movie 3	Movie 4	Movie 5	Movie 6	Movie 7	Movie 8	Movie 9	Movie 10	Movie 1	Movie 2	Movie 3	Movie 4	Movie 5	Movie 6	Movie 7	Movie 8	Movie 9	Movie 10	Movie 1	Movie 2	Movie 3	Movie 4	Movie 5	Movie 6	Movie 7	Movie 8	Movie 9	Movie 10	Movie 1	Movie 2	Movie 3	Movie 4	Movie 5	Movie 6	Movie 7	Movie 8	Movie 9	Movie 10
Encoding	Offset	Movie 1	1	0.53914	0.60901	0.61819	0.32875	0.45369	0.61472	0.41929	0.61644	0.27034	-0.37477	-0.059889	-0.20755	-0.33345	0.12351	-0.21907	-0.19451	0.036559	-0.045601	-0.32131	0.53006	0.26621	0.44419	0.4813	0.51765	0.18688	0.3237	0.20685	0.25048	0.49455	-0.059907	0.084924	-0.076691	-0.076723	-0.0511	0.18012	-0.20535	0.095844	0.10222	-0.07173
		Movie 2	0.53914	1	0.54668	0.59088	0.21089	0.45794	0.60711	0.50589	0.56573	0.28304	-0.24918	-0.17541	-0.09262	-0.38631	0.013328	-0.12345	-0.14806	-0.048141	0.025952	-0.25822	0.36948	0.31366	0.37951	0.39978	0.44464	0.24592	0.34853	0.31828	0.33078	0.38543	-0.086634	0.028346	-0.042491	-0.16692	-0.036592	0.15894	-0.15345	0.020871	-0.0072359	0.013257
		Movie 3	0.60901	0.54668	1	0.60502	0.28259	0.41441	0.58761	0.4599	0.58031	0.25918	-0.24532	-0.10319	-0.18765	-0.44222	0.13479	-0.20977	-0.089056	0.0091862	-0.010348	-0.30072	0.4679	0.34594	0.42294	0.49175	0.47761	0.23072	0.39703	0.19444	0.32457	0.41817	-0.14604	0.056303	-0.038592	-0.101	-0.023142	0.14718	-0.11137	0.10379	0.046616	-0.092755
		Movie 4	0.61819	0.59088	0.60502	1	0.21063	0.47032	0.67227	0.48754	0.67254	0.21735	-0.33206	-0.15176	-0.19389	-0.47783	0.11167	-0.17569	-0.10323	0.050008	-0.030299	-0.35162	0.4862	0.29813	0.42142	0.51158	0.48101	0.26227	0.40431	0.21587	0.34876	0.51475	-0.093619	0.052568	-0.065031	-0.10364	0.019297	0.13266	-0.17794	0.014188	0.046988	-0.076674
		Movie 5	0.32875	0.21089	0.28259	0.21063	1	0.1713	0.23089	0.13737	0.26825	0.22992	-0.17402	0.021204	-0.24961	-0.11742	-0.0069167	-0.13545	-0.13477	0.17726	-0.00018641	-0.24176	0.20634	0.054551	0.29801	0.21883	0.27062	0.068096	0.16119	0.00796	0.063209	0.33954	0.0074944	0.057275	-0.028384	0.066817	0.074635	0.12091	-0.086351	0.16947	0.10014	-0.060728
		Movie 6	0.45369	0.45794	0.41441	0.47032	0.1713	1	0.4524	0.39689	0.40622	0.2204	-0.17338	-0.10007	-0.069459	-0.24979	0.099057	-0.061863	-0.14035	-0.051336	-0.091869	-0.16406	0.35081	0.2543	0.29941	0.41417	0.35791	0.20548	0.25498	0.22363	0.22772	0.3676	-0.15407	-0.0011934	-0.013713	-0.11769	-0.078384	0.034469	-0.12677	0.016519	-0.01299	-0.029746
		Movie 7	0.61472	0.60711	0.58761	0.67227	0.23089	0.4524	1	0.52932	0.66333	0.234	-0.27644	-0.19929	-0.15943	-0.43028	0.14083	-0.18281	-0.22979	-0.045398	0.006035	-0.34205	0.47864	0.37457	0.46593	0.55559	0.49903	0.28907	0.41256	0.27742	0.42264	0.49049	-0.14672	0.062774	-0.031418	-0.063845	-0.04053	0.052159	-0.21652	-0.012784	0.005446	-0.061983
		Movie 8	0.41929	0.50589	0.4599	0.48754	0.13737	0.39689	0.52932	1	0.51855	0.25543	-0.18796	-0.1588	-0.032256	-0.41532	0.083206	-0.06033	-0.13772	-0.08815	-0.11903	-0.17946	0.33196	0.29452	0.33485	0.39953	0.42237	0.20753	0.34612	0.2721	0.30341	0.36182	-0.1233	-0.011851	-0.067113	-0.13633	-0.015699	0.050045	-0.14285	-0.019271	-0.10416	-0.082776
		Movie 9	0.61644	0.56573	0.58031	0.67254	0.26825	0.40622	0.66333	0.51855	1	0.23219	-0.29498	-0.15918	-0.14892	-0.38636	0.12333	-0.20523	-0.089913	0.05117	-0.0014222	-0.32161	0.46059	0.31794	0.42779	0.50137	0.43313	0.22711	0.2966	0.21803	0.42389	0.48835	-0.042292	0.10774	-0.035535	-0.010133	-0.080369	0.11233	-0.30524	0.031417	-0.021942	-0.074228
		Movie 10	0.27034	0.28304	0.25918	0.21735	0.22992	0.2204	0.234	0.25543	0.23219	1	-0.11466	-0.057601	-0.049197	-0.19773	-0.1118	-0.073862	-0.11057	0.029187	0.0069564	-0.14246	0.11953	0.18759	0.20354	0.20494	0.20499	0.01941	0.21264	0.11315	0.17261	0.26227	-0.017027	-0.080463	0.071091	-0.039658	-0.01198	-0.011301	-0.079465	-0.014252	-0.044453	-0.0054039
	Middle	Movie 1	-0.37477	-0.24918	-0.24532	-0.33206	-0.17402	-0.17338	-0.27644	-0.18796	-0.29498	-0.11466	1	-0.011384	0.074967	0.10935	-0.14423	0.1307	0.036682	-0.069707	0.13058	0.1733	-0.26257	-0.094162	-0.20259	-0.17035	-0.25868	-0.16833	-0.1774	-0.06948	0.015275	-0.28698	-0.023699	-0.010935	0.056386	-0.15643	0.011995	-0.028565	0.099449	0.049645	-0.093315	-0.069395
		Movie 2	-0.059889	-0.17541	-0.10319	-0.15176	0.021204	-0.10007	-0.19929	-0.1588	-0.15918	-0.057601	-0.011384	1	-0.039385	0.15931	-0.17239	0.02019	-0.053895	0.12404	0.022062	-0.035529	0.023314	-0.10444	-0.045752	-0.1298	-0.10594	-0.13225	-0.099519	-0.11468	-0.14062	-0.11734	-0.039725	0.10133	0.04382	0.032494	0.024889	-0.04259	0.061707	0.1714	0.075413	0.021003
		Movie 3	-0.20755	-0.09262	-0.18765	-0.19389	-0.24961	-0.069459	-0.15943	-0.032256	-0.14892	-0.049197	0.074967	-0.039385	1	0.036896	0.10491	0.24796	0.086635	-0.14123	-0.071342	0.36672	-0.17338	-0.084212	-0.29725	-0.19024	-0.19148	-0.030522	-0.24164	0.11798	-0.017663	-0.20297	0.015943	-0.044433	0.12519	0.05066	-0.010735	-0.075027	0.028285	-0.096307	-0.029332	0.073491
		Movie 4	-0.33345	-0.38631	-0.44222	-0.47783	-0.11742	-0.24979	-0.43028	-0.41532	-0.38636	-0.19773	0.10935	0.15931	0.036896	1	-0.017529	0.017071	0.11459	-0.0041702	-0.0077545	0.14	-0.23011	-0.2133	-0.25987	-0.37812	-0.28351	-0.096004	-0.30588	-0.25202	-0.35665	-0.24819	0.011357	-0.024834	0.04296	0.13363	0.030439	-0.052008	0.09191	-0.050982	-0.040111	0.051894
		Movie 5	0.12351	0.013328	0.13479	0.11167	-0.0069167	0.099057	0.14083	0.083206	0.12333	-0.1118	-0.14423	-0.17239	0.10491	-0.017529	1	0.035636	-0.01364	0.014745	-0.081082	0.075831	0.080562	-0.014683	0.022435	0.10877	0.058797	0.25176	-0.0029259	-0.049989	-0.041597	0.14343	-0.02165	-0.011242	-0.021628	0.11161	0.023699	-0.016465	0.014594	0.007261	-0.098279	0.042861
		Movie 6	-0.21907	-0.12345	-0.20977	-0.17569	-0.13545	-0.061863	-0.18281	-0.06033	-0.20523	-0.073862	0.1307	0.02019	0.24796	0.017071	0.035636	1	0.00047829	0.015585	-0.049907	0.29087	-0.1678	-0.13901	-0.1595	-0.089776	-0.21204	-0.1164	-0.13718	0.013742	-0.052908	-0.14387	0.0034829	0.003585	0.085423	-0.033408	-0.016943	-0.044252	0.05021	-0.029361	-0.055678	0.043843
		Movie 7	-0.19451	-0.14806	-0.089056	-0.10323	-0.13477	-0.14035	-0.22979	-0.13772	-0.089913	-0.11057	0.036682	-0.053895	0.086635	0.11459	-0.01364	0.00047829	1	-0.084393	0.12006	0.078511	-0.16598	-0.058176	-0.19036	-0.18152	-0.21582	-0.049278	-0.12238	-0.092945	0.033331	-0.14663	0.11194	-0.099952	-0.037456	-0.091381	-0.040322	0.064107	0.037756	-0.10463	-0.070778	0.10059
		Movie 8	0.036559	-0.048141	0.0091862	0.050008	0.17726	-0.051336	-0.045398	-0.08815	0.05117	0.029187	-0.069707	0.12404	-0.14123	-0.0041702	0.014745	0.015585	-0.084393	1	0.017681	-0.072527	0.058178	-0.074834	0.052584	0.057477	0.043013	-0.066328	0.012803	-0.13304	-0.037049	0.094617	-0.0023179	0.081077	-0.025756	0.070977	-0.042122	-0.021648	-0.10132	0.12139	0.10359	0.018451
		Movie 9	-0.045601	0.025952	-0.010348	-0.030299	-0.00018641	-0.091869	0.006035	-0.11903	-0.0014222	0.0069564	0.13058	0.022062	-0.071342	-0.0077545	-0.081082	-0.049907	0.12006	0.017681	1	-0.0826	-0.02646	0.055337	-0.015185	0.022792	-0.040061	0.018484	-0.010088	0.0023418	0.018448	-0.0060592	0.054124	0.032426	0.041505	-0.032259	0.0063649	0.056417	0.034684	0.025255	0.044643	0.039566
		Movie 10	-0.32131	-0.25822	-0.30072	-0.35162	-0.24176	-0.16406	-0.34205	-0.17946	-0.32161	-0.14246	0.1733	-0.035529	0.36672	0.14	0.075831	0.29087	0.078511	-0.072527	-0.0826	1	-0.29985	-0.17021	-0.32575	-0.26228	-0.28731	-0.088924	-0.26114	0.068635	-0.19352	-0.29814	0.11837	-0.061342	0.087382	0.073246	0.058547	-0.082185	0.15602	-0.067912	0.029943	0.11875
Recall	Offset	Movie 1	0.53006	0.36948	0.4679	0.4862	0.20634	0.35081	0.47864	0.33196	0.46059	0.11953	-0.26257	0.023314	-0.17338	-0.23011	0.080562	-0.1678	-0.16598	0.058178	-0.02646	-0.29985	1	0.32593	0.48838	0.50912	0.51174	0.16511	0.31153	0.24353	0.32142	0.47577	-0.19475	0.1132	-0.049905	-0.081122	-0.091185	0.064234	-0.16553	0.10575	0.10121	0.014418
		Movie 2	0.26621	0.31366	0.34594	0.29813	0.054551	0.2543	0.37457	0.29452	0.31794	0.18759	-0.094162	-0.10444	-0.084212	-0.2133	-0.014683	-0.13901	-0.058176	-0.074834	0.055337	-0.17021	0.32593	1	0.37426	0.42373	0.31884	0.19813	0.30815	0.32535	0.33304	0.30136	-0.10177	-0.13097	0.062097	-0.16142	-0.084054	0.010667	-0.10128	-0.010412	-0.024984	-0.016769
		Movie 3	0.44419	0.37951	0.42294	0.42142	0.29801	0.29941	0.46593	0.33485	0.42779	0.20354	-0.20259	-0.045752	-0.29725	-0.25987	0.022435	-0.1595	-0.19036	0.052584	-0.015185	-0.32575	0.48838	0.37426	1	0.48073	0.4692	0.16277	0.41087	0.28577	0.28107	0.50914	-0.077202	0.032925	-0.091259	-0.14467	-0.1317	0.15573	-0.11709	0.015867	0.067207	-0.1066
		Movie 4	0.4813	0.39978	0.49175	0.51158	0.21883	0.41417	0.55559	0.39953	0.50137	0.20494	-0.17035	-0.1298	-0.19024	-0.37812	0.10877	-0.089776	-0.18152	0.057477	0.022792	-0.26228	0.50912	0.42373	0.48073	1	0.49912	0.26545	0.37131	0.23431	0.35424	0.53822	-0.18789	0.064671	-0.0016687	-0.17139	-0.068422	-0.028033	-0.23054	0.093996	-0.038453	-0.0025714
		Movie 5	0.51765	0.44464	0.47761	0.48101	0.27062	0.35791	0.49903	0.42237	0.43313	0.20499	-0.25868	-0.10594	-0.19148	-0.28351	0.058797	-0.21204	-0.21582	0.043013	-0.040061	-0.28731	0.51174	0.31884	0.4692	0.49912	1	0.23978	0.40601	0.29979	0.25577	0.45528	-0.10696	0.04491	-0.089168	-0.17728	-0.080764	0.17637	-0.20314	0.011758	0.055071	-0.017824
		Movie 6	0.18688	0.24592	0.23072	0.26227	0.068096	0.20548	0.28907	0.20753	0.22711	0.01941	-0.16833	-0.13225	-0.030522	-0.096004	0.25176	-0.1164	-0.049278	-0.066328	0.018484	-0.088924	0.16511	0.19813	0.16277	0.26545	0.23978	1	0.23913	0.091868	0.087058	0.29211	-0.053624	-0.0034891	0.0085806	0.027346	-0.053254	-0.0077911	-0.075986	-0.0077335	-0.12013	0.044503
		Movie 7	0.3237	0.34853	0.39703	0.40431	0.16119	0.25498	0.41256	0.34612	0.2966	0.21264	-0.1774	-0.099519	-0.24164	-0.30588	-0.0029259	-0.13718	-0.12238	0.012803	-0.010088	-0.26114	0.31153	0.30815	0.41087	0.37131	0.40601	0.23913	1	0.20214	0.28561	0.41834	-0.13092	-0.034614	-0.052078	-0.17808	0.0050923	0.069798	-0.23582	-0.053096	-0.083647	0.036068
		Movie 8	0.20685	0.31828	0.19444	0.21587	0.00796	0.22363	0.27742	0.2721	0.21803	0.11315	-0.06948	-0.11468	0.11798	-0.25202	-0.049989	0.013742	-0.092945	-0.13304	0.0023418	0.068635	0.24353	0.32535	0.28577	0.23431	0.29979	0.091868	0.20214	1	0.24183	0.21813	-0.047964	-0.05854	-0.065301	-0.08741	-0.06258	0.12033	-0.021642	-0.14929	-0.060405	-0.067557
		Movie 9	0.25048	0.33078	0.32457	0.34876	0.063209	0.22772	0.42264	0.30341	0.42389	0.17261	0.015275	-0.14062	-0.017663	-0.35665	-0.041597	-0.052908	0.033331	-0.037049	0.018448	-0.19352	0.32142	0.33304	0.28107	0.35424	0.25577	0.087058	0.28561	0.24183	1	0.31767	-0.10617	-0.034936	0.022119	-0.14282	-0.10908	0.028514	-0.20843	-0.081634	-0.166	-0.097037
		Movie 10	0.49455	0.38543	0.41817	0.51475	0.33954	0.3676	0.49049	0.36182	0.48835	0.26227	-0.28698	-0.11734	-0.20297	-0.24819	0.14343	-0.14387	-0.14663	0.094617	-0.0060592	-0.29814	0.47577	0.30136	0.50914	0.53822	0.45528	0.29211	0.41834	0.21813	0.31767	1	-0.15174	-0.0065784	-0.066683	-0.015464	-0.0058809	0.038504	-0.3039	0.038756	-0.090992	-0.049992
	Middle	Movie 1	-0.059907	-0.086634	-0.14604	-0.093619	0.0074944	-0.15407	-0.14672	-0.1233	-0.042292	-0.017027	-0.023699	-0.039725	0.015943	0.011357	-0.02165	0.0034829	0.11194	-0.0023179	0.054124	0.11837	-0.19475	-0.10177	-0.077202	-0.18789	-0.10696	-0.053624	-0.13092	-0.047964	-0.10617	-0.15174	1	-0.021536	-0.012444	0.030066	0.0010952	0.040739	0.054994	-0.065905	0.020547	-0.031908
		Movie 2	0.084924	0.028346	0.056303	0.052568	0.057275	-0.0011934	0.062774	-0.011851	0.10774	-0.080463	-0.010935	0.10133	-0.044433	-0.024834	-0.011242	0.003585	-0.099952	0.081077	0.032426	-0.061342	0.1132	-0.13097	0.032925	0.064671	0.04491	-0.0034891	-0.034614	-0.05854	-0.034936	-0.0065784	-0.021536	1	0.031235	0.043668	-0.057177	0.017841	-0.1357	0.011609	0.026131	-0.029452
		Movie 3	-0.076691	-0.042491	-0.038592	-0.065031	-0.028384	-0.013713	-0.031418	-0.067113	-0.035535	0.071091	0.056386	0.04382	0.12519	0.04296	-0.021628	0.085423	-0.037456	-0.025756	0.041505	0.087382	-0.049905	0.062097	-0.091259	-0.0016687	-0.089168	0.0085806	-0.052078	-0.065301	0.022119	-0.066683	-0.012444	0.031235	1	0.037904	-0.053401	-0.043681	0.07717	0.045627	0.049921	0.145
		Movie 4	-0.076723	-0.16692	-0.101	-0.10364	0.066817	-0.11769	-0.063845	-0.13633	-0.010133	-0.039658	-0.15643	0.032494	0.05066	0.13363	0.11161	-0.033408	-0.091381	0.070977	-0.032259	0.073246	-0.081122	-0.16142	-0.14467	-0.17139	-0.17728	0.027346	-0.17808	-0.08741	-0.14282	-0.015464	0.030066	0.043668	0.037904	1	0.015551	-0.080437	0.015384	0.10671	0.12692	0.010164
		Movie 5	-0.0511	-0.036592	-0.023142	0.019297	0.074635	-0.078384	-0.04053	-0.015699	-0.080369	-0.01198	0.011995	0.024889	-0.010735	0.030439	0.023699	-0.016943	-0.040322	-0.042122	0.0063649	0.058547	-0.091185	-0.084054	-0.1317	-0.068422	-0.080764	-0.053254	0.0050923	-0.06258	-0.10908	-0.0058809	0.0010952	-0.057177	-0.053401	0.015551	1	-0.053651	0.14801	0.096993	0.014787	-0.0039955
		Movie 6	0.18012	0.15894	0.14718	0.13266	0.12091	0.034469	0.052159	0.050045	0.11233	-0.011301	-0.028565	-0.04259	-0.075027	-0.052008	-0.016465	-0.044252	0.064107	-0.021648	0.056417	-0.082185	0.064234	0.010667	0.15573	-0.028033	0.17637	-0.0077911	0.069798	0.12033	0.028514	0.038504	0.040739	0.017841	-0.043681	-0.080437	-0.053651	1	0.060235	0.016402	0.078298	-0.054919
		Movie 7	-0.20535	-0.15345	-0.11137	-0.17794	-0.086351	-0.12677	-0.21652	-0.14285	-0.30524	-0.079465	0.099449	0.061707	0.028285	0.09191	0.014594	0.05021	0.037756	-0.10132	0.034684	0.15602	-0.16553	-0.10128	-0.11709	-0.23054	-0.20314	-0.075986	-0.23582	-0.021642	-0.20843	-0.3039	0.054994	-0.1357	0.07717	0.015384	0.14801	0.060235	1	-0.032043	0.13998	-0.058215
		Movie 8	0.095844	0.020871	0.10379	0.014188	0.16947	0.016519	-0.012784	-0.019271	0.031417	-0.014252	0.049645	0.1714	-0.096307	-0.050982	0.007261	-0.029361	-0.10463	0.12139	0.025255	-0.067912	0.10575	-0.010412	0.015867	0.093996	0.011758	-0.0077335	-0.053096	-0.14929	-0.081634	0.038756	-0.065905	0.011609	0.045627	0.10671	0.096993	0.016402	-0.032043	1	0.16086	-0.07315
		Movie 9	0.10222	-0.0072359	0.046616	0.046988	0.10014	-0.01299	0.005446	-0.10416	-0.021942	-0.044453	-0.093315	0.075413	-0.029332	-0.040111	-0.098279	-0.055678	-0.070778	0.10359	0.044643	0.029943	0.10121	-0.024984	0.067207	-0.038453	0.055071	-0.12013	-0.083647	-0.060405	-0.166	-0.090992	0.020547	0.026131	0.049921	0.12692	0.014787	0.078298	0.13998	0.16086	1	0.002506
		Movie 10	-0.07173	0.013257	-0.092755	-0.076674	-0.060728	-0.029746	-0.061983	-0.082776	-0.074228	-0.0054039	-0.069395	0.021003	0.073491	0.051894	0.042861	0.043843	0.10059	0.018451	0.039566	0.11875	0.014418	-0.016769	-0.1066	-0.0025714	-0.017824	0.044503	0.036068	-0.067557	-0.097037	-0.049992	-0.031908	-0.029452	0.145	0.010164	-0.0039955	-0.054919	-0.058215	-0.07315	0.002506	1

## Sheet: Figure3C
	Recall-Recall		Encoding-Recall
	Offset	Middle	Offset	Middle
S1	0.12327	0.13269	0.12055	0.07365
S2	0.31083	-0.019531	0.27441	0.010663
S3	0.24371	0.078462	0.27301	0.0061893
S4	0.3127	0.021293	0.34314	-0.03907
S5	0.472	-0.054168	0.34876	-0.0088741
S6	0.49899	-0.027189	0.48996	-0.033667
S7	0.33734	-0.019158	0.35124	0.013197
S8	0.46033	0.0027012	0.38882	-0.004248
S9	0.24992	-0.047832	0.27593	0.0086109
S10	0.44251	0.048281	0.40746	0.0068402
S11	0.19927	0.035525	0.24443	0.053912
S12	0.44689	-0.0010623	0.31271	0.053322
S13	0.36828	-0.045511	0.33372	-0.030113
S14	0.26726	0.010532	0.34988	0.0047744
S15	0.42345	0.003324	0.4348	0.0082419

## Sheet: Figure3D_OnsetLocked
0.088064	0.1181	0.12334	0.10069	0.044887	0.068677	0.058698	0.051401	0.054411	0.030711	0.010132	-0.0032254	-0.015054	-0.036698	-0.053341	-0.10753	-0.11905	-0.10085	-0.14367	-0.18773	-0.22072	-0.28178	-0.32518	-0.31324	-0.28708	-0.28386	-0.24996	-0.19797	-0.091086	-0.089789	-0.062334	-0.05349	-0.028051	-0.0014929	0.054154	0.027721	0.043719	0.10119	0.069582	0.057706	0.047248	0.067342	0.093589	0.083245	0.11722	0.10388	0.052261	0.057492	0.059795	0.1538
0.087559	0.083064	0.11047	0.087862	0.063754	0.048513	0.079876	0.041727	0.051521	0.08191	0.058833	0.040548	0.0026552	0.0045241	-0.015923	-0.049361	-0.016961	-0.01557	-0.058495	-0.13914	-0.12948	-0.1792	-0.20438	-0.23498	-0.23434	-0.25153	-0.22882	-0.17526	-0.13285	-0.072444	-0.0048048	-0.023732	0.0049115	-0.040132	0.043928	0.038343	0.057076	0.07748	0.043078	0.035782	-0.0045918	0.0066396	0.030887	0.026791	0.072955	0.085553	0.03582	0.047094	-0.002027	0.12796
0.093434	0.085775	0.099932	0.11974	0.05728	0.07186	0.046925	0.052398	0.063127	0.057219	0.034738	0.051678	0.028288	0.031855	0.017324	-0.05758	-0.015426	0.012919	0.030431	-0.036527	-0.039948	-0.10268	-0.17658	-0.21247	-0.1953	-0.21425	-0.23339	-0.19882	-0.14526	-0.10771	-0.0080627	0.017868	-0.023607	-0.053205	-0.00093023	0.062187	0.072883	0.016323	0.030848	0.036585	-0.039037	0.0038384	0.05369	0.081816	0.092373	0.10535	0.077303	0.0038507	-0.027717	0.10267
0.092499	0.069279	0.078773	0.05998	0.02487	0.029133	0.064957	0.020233	0.052267	0.010598	0.021895	0.022962	0.050866	-0.00053604	-0.050036	-0.080152	-0.030173	-0.027485	-0.029745	-0.10185	-0.13181	-0.18608	-0.19533	-0.22386	-0.21964	-0.23101	-0.20686	-0.15566	-0.12443	-0.07382	-0.026172	0.043424	-0.0081254	-0.00814	0.038788	0.092547	0.10443	0.055361	0.0057399	0.031401	0.0019312	0.08468	0.13406	0.12566	0.084139	0.053215	0.077286	0.091831	0.068256	0.13881
0.075893	0.080174	0.07598	0.056834	0.032713	-0.0065365	0.029618	0.019774	0.031778	-0.014831	0.013667	0.0016355	0.017222	-0.0334	-0.036622	-0.10732	-0.066456	-0.10321	-0.10198	-0.17826	-0.20544	-0.26682	-0.27913	-0.31755	-0.29448	-0.26405	-0.18607	-0.098326	-0.067363	-0.045586	-0.019581	0.045767	0.026083	0.035425	0.090907	0.10509	0.10092	0.081227	0.087429	0.062175	0.082119	0.069842	0.07383	0.1141	0.11425	0.085745	0.10587	0.062668	0.060126	0.1175
0.016687	0.047319	0.056101	0.041419	-0.010311	0.039328	0.0035464	0.031224	0.037333	0.036245	0.053204	0.021785	0.015862	-0.041436	-0.078468	-0.15101	-0.097075	-0.12448	-0.14486	-0.1618	-0.21578	-0.25872	-0.28371	-0.29927	-0.25995	-0.21861	-0.13083	-0.042178	-0.015804	0.025167	0.032018	0.023378	0.070482	0.054701	0.079299	0.10806	0.15383	0.147	0.038577	0.048061	0.097257	0.10486	0.10125	0.080665	0.1125	0.062128	0.092085	0.081925	0.067412	0.11064
-0.0031674	0.049506	0.052733	0.0094001	-0.070404	0.012087	0.00051536	0.0077078	0.0075511	-0.072786	-0.037568	0.032206	0.0085066	-0.04027	-0.09385	-0.15391	-0.10116	-0.13723	-0.13438	-0.18257	-0.19265	-0.19864	-0.22058	-0.25579	-0.19279	-0.13384	-0.048274	0.0046427	0.066318	0.084316	0.067108	-0.0043531	0.10737	0.069101	0.13409	0.11668	0.19778	0.12476	0.092452	0.095386	0.10169	0.13656	0.10406	0.127	0.12129	0.046888	0.069039	0.030737	0.074961	0.11745
0.01394	0.033163	0.031594	0.042558	-0.054858	-0.015634	-0.0044541	0.022959	0.0050277	-0.055658	0.0051425	0.0060718	-0.027739	-0.055518	-0.1154	-0.11783	-0.10339	-0.13141	-0.1332	-0.10278	-0.11596	-0.12263	-0.14393	-0.1347	-0.12651	-0.10817	-0.021158	0.039163	0.092791	0.082258	0.035302	0.014314	0.059092	0.085551	0.10572	0.093404	0.15557	0.086446	0.063357	0.054417	0.039098	0.079711	0.088611	0.16122	0.051688	0.003819	0.040066	0.025593	0.013943	0.043188
-0.0037934	0.0021807	-0.022722	-0.041845	-0.040107	-0.048992	-0.0088601	-0.023421	-0.02434	-0.074267	-0.00067445	0.0020241	-0.008888	-0.032704	-0.045217	-0.091771	-0.062182	-0.064494	-0.074681	-0.072322	-0.10914	-0.088248	-0.08786	-0.11163	-0.11175	-0.097075	-0.012897	0.0062831	0.075884	0.082769	-0.011474	0.015033	0.038574	0.055424	0.045839	0.073434	0.11374	0.070459	0.017627	-0.012985	0.038485	0.075271	0.073996	0.12245	0.010572	-0.019432	-0.03175	-0.045872	0.048849	0.038776
0.022736	0.017314	-0.065388	-0.042668	-0.044149	-0.015602	-0.0070658	-0.012626	0.0041909	0.010032	0.0080586	-0.02218	-0.0091259	-0.018532	-0.022871	-0.078025	-0.058492	-0.071189	-0.063638	-0.035251	-0.088455	-0.079718	-0.081788	-0.090294	-0.059239	-0.11358	-0.01884	0.022988	0.080119	0.068644	0.066673	0.033124	0.036368	0.066231	0.077019	0.075658	0.064991	0.067699	0.016274	0.025946	0.06291	0.047679	0.06725	0.12173	0.020078	0.005837	-0.047969	-0.040345	-0.0067904	0.027562
0.028461	0.053422	0.0046563	-0.079952	-0.032333	0.0099378	-0.0065621	-0.015134	-0.028713	-0.024003	-0.024897	0.0047031	0.012654	0.049236	-0.010436	-0.033465	-0.04092	-0.031314	-0.053157	-0.046019	-0.057874	-0.079156	-0.074178	-0.094238	-0.063744	-0.087883	-0.0016224	0.001401	0.027117	0.097049	0.040201	0.053449	0.074349	0.07111	0.014033	0.022221	0.065834	0.050767	-0.018399	0.010251	0.045541	0.056723	0.079294	0.12362	0.070216	-0.022041	-0.061233	-0.015237	0.035238	-0.0117
0.076001	0.01501	0.0029799	-0.049997	-0.020763	-0.021676	0.022243	0.024764	0.058414	0.011599	0.0094408	0.035342	0.0041404	-0.0026512	-0.026089	-0.072619	-0.0066027	-0.010931	-0.043523	-0.079513	-0.06034	-0.10421	-0.10587	-0.10869	-0.08596	-0.10329	-0.041538	-0.050146	0.0052537	0.046184	-0.0040951	0.011736	0.049912	0.0052918	-0.037123	0.038303	-0.010245	0.018282	-0.026937	-0.0060397	0.036233	0.040792	0.071262	0.13302	0.037307	0.0010545	0.025342	0.00098096	0.022579	0.017397
0.12349	-0.007791	0.059766	-0.04223	-0.021551	-0.06291	-0.042413	-0.034387	0.061901	0.03797	0.017284	0.021549	-0.048148	0.0040609	-0.056107	-0.065495	-0.045671	-0.036151	-0.072239	-0.095314	-0.07337	-0.093399	-0.089257	-0.072285	-0.10647	-0.089278	-0.055977	-0.033178	-0.0071298	0.031435	0.0093663	0.017024	0.051792	0.019458	-0.055519	-0.039775	0.038336	0.061565	0.014394	0.063591	0.01503	0.017177	0.061658	0.034128	0.003345	-0.020405	0.042846	0.062608	0.010333	0.018995
0.049595	-0.03889	0.025528	-0.0045877	-0.070322	-0.088801	-0.074061	-0.021541	0.049425	0.022745	-0.035895	-0.019382	-0.032468	-0.046715	-0.020855	-0.0064736	0.081019	0.056746	-0.047642	-0.073684	0.0083374	-0.0025795	0.0099703	0.0077959	0.0054056	0.02927	0.037938	0.014265	0.010877	0.055312	0.08067	-0.0083417	0.04759	-0.033625	-0.029092	0.015975	0.076105	0.037894	0.040014	0.05241	-0.0035535	0.018183	0.017238	0.02384	0.015318	0.026746	0.11459	0.093853	-0.0060208	0.020338
-0.0021719	-0.042544	0.017517	-0.011722	-0.06731	-0.070322	-0.058382	-0.020007	0.024311	-0.015783	-0.10248	-0.017241	-0.047167	-0.042365	-0.031128	-0.03767	0.045698	0.046569	0.0079437	0.017579	0.064079	0.06909	0.056686	0.047644	0.044724	0.044509	0.061878	0.035396	0.044318	0.056683	0.10878	-0.0024199	0.068428	0.010535	0.008146	0.0037304	0.0092274	0.038719	0.074778	0.08935	0.020947	0.01999	0.0041995	0.020311	0.03768	-0.0067639	0.044944	0.060363	-0.039724	-0.0078226
-0.00644	-0.040473	-0.021081	-0.037922	-0.095625	-0.07346	-0.10344	-0.01837	-0.0052127	-0.073342	-0.09912	-0.011025	-0.0064298	-0.032998	-0.0023943	-0.00044108	0.082353	0.090343	0.097487	0.097516	0.15028	0.16841	0.16986	0.14367	0.10912	0.091277	0.091986	0.093775	0.066453	0.080546	0.13008	0.0030895	-0.0049745	0.0017816	0.024263	0.07811	0.091996	0.047469	0.026399	0.020342	-0.019032	-0.03439	-0.034132	-0.029115	-0.019456	0.0072548	0.051136	0.022581	-0.061593	-0.04359
-0.0092794	-0.085277	-0.074216	-0.016011	-0.041409	-0.043859	-0.079139	0.016928	0.0077568	-0.018717	-0.027074	0.049507	0.083614	0.033482	0.022309	-0.00060229	0.087934	0.11214	0.11645	0.12444	0.18484	0.2012	0.21311	0.19343	0.13702	0.15383	0.16646	0.094155	0.033368	0.034434	0.070938	-0.026228	-0.038732	-0.051785	0.022826	0.063427	0.09605	0.015552	-0.0027925	0.021232	-0.058014	-0.054955	-0.092656	-0.06172	-0.017979	-0.0038127	0.027322	-0.014075	-0.073719	-0.053326
0.022641	-0.040117	-0.070479	0.0045981	-0.061305	-0.074773	-0.075408	0.015313	-0.017232	-0.0091521	-0.018394	0.025661	0.15626	0.048494	0.040242	-0.012202	0.12884	0.13444	0.14013	0.15143	0.20601	0.20909	0.22165	0.18572	0.12785	0.13511	0.11608	0.073115	0.040725	0.024942	0.055124	-0.024939	-0.035555	-0.013682	0.026773	0.085618	0.078743	0.014841	-0.0018717	0.033174	-0.066553	-0.079515	-0.071576	-0.01683	-0.029363	-0.029509	0.0085448	-0.051635	-0.048813	-0.026937
-0.023134	-0.097539	-0.047474	0.0085143	-0.021859	-0.07962	-0.064095	-0.021208	-0.02447	0.017047	0.0018393	0.020525	0.10905	0.034015	0.014749	0.0078102	0.08227	0.095631	0.10629	0.10948	0.11209	0.15422	0.15825	0.14963	0.13485	0.11077	0.083242	0.076638	0.062733	0.047155	0.043056	-0.018986	-0.025273	0.033069	0.011098	0.10247	0.032373	-0.010749	0.0040081	0.074945	-0.058404	-0.064971	-0.045589	-0.023828	-0.041975	-0.01179	-0.0022535	-0.045038	-0.028846	-0.0095233
-0.034233	-0.03628	-0.069383	-0.039306	-0.062879	-0.10065	-0.082499	-0.01972	-0.046312	-0.02067	-0.0080048	0.0078207	0.067839	0.026387	-0.020087	-0.025444	0.074987	0.067009	0.078072	0.10349	0.10498	0.15592	0.15321	0.16863	0.1764	0.1807	0.14227	0.12411	0.106	0.10014	0.043829	0.040097	0.014408	0.044183	0.041809	0.11817	0.047781	-0.012671	0.033492	0.082215	-0.059341	-0.095448	-0.087192	-0.050551	-0.067403	-0.062256	-0.016521	-0.058414	-0.045871	-0.014865
-0.021363	-0.017157	-0.069145	-0.028834	-0.070783	-0.062234	-0.062792	-0.013916	-0.055468	-0.027294	-0.019585	-0.049883	0.012808	0.037759	0.0039406	0.040606	0.027068	0.058243	0.063676	0.1069	0.085482	0.16003	0.17709	0.18917	0.20825	0.1815	0.16097	0.15086	0.13956	0.1207	0.058221	-0.012879	0.017281	0.07867	0.018697	0.10871	0.066869	0.013442	0.0030411	0.050316	-0.080717	-0.10934	-0.047076	-0.044316	-0.032483	-0.062459	0.0021328	-0.0052988	-0.042484	-0.06002
-0.041475	-0.027637	-0.054518	-0.064064	-0.11963	-0.10724	-0.099222	-0.056804	-0.085154	-0.056729	-0.077746	-0.070274	0.023555	0.076758	0.075119	0.077666	0.10486	0.076207	0.098499	0.12068	0.15817	0.21776	0.22451	0.2096	0.2353	0.23388	0.20512	0.16816	0.20521	0.17419	0.091761	0.026242	0.075947	0.096741	0.054499	0.13502	0.086176	0.0057348	0.028194	0.05811	-0.047868	-0.097963	-0.094434	-0.062364	-0.085133	-0.094621	-0.083	-0.06125	-0.061434	-0.06451
-0.026701	-0.031565	-0.079017	-0.051788	-0.076195	-0.095807	-0.071121	-0.081052	-0.064763	-0.030142	-0.075705	-0.033918	0.011765	0.048994	0.036597	0.043579	0.058848	0.056575	0.07459	0.14688	0.15911	0.18924	0.1729	0.20423	0.22886	0.22052	0.22313	0.20917	0.22417	0.19304	0.14901	0.068084	0.10271	0.11896	0.082994	0.097584	0.059675	-0.024822	0.026304	0.08066	0.013177	-0.0068337	-0.038842	-0.031956	-0.053922	-0.064602	-0.047515	-0.037561	-0.062748	-0.067776
-0.0034732	-0.026439	-0.034839	-0.068258	-0.099893	-0.10681	-0.085788	-0.06597	-0.025334	-0.0082832	-0.064044	-0.028798	0.042171	0.062766	0.027087	0.013394	0.058124	0.013262	0.052583	0.071085	0.0535	0.094678	0.093383	0.11882	0.16893	0.17265	0.19183	0.1989	0.22541	0.21896	0.16143	0.090121	0.12167	0.14363	0.10604	0.094436	0.077607	0.041576	0.041111	0.13796	0.035292	-0.010721	-0.065482	-0.032398	-0.074404	-0.082683	-0.057764	0.030713	-0.0022083	-0.018217
0.021765	-0.017765	-0.015136	-0.026081	-0.098092	-0.10352	-0.072318	-0.051996	-0.056831	-0.056485	-0.068801	-0.0080383	0.02309	0.027921	0.047616	0.020242	0.041021	0.041483	0.061572	0.026363	0.050805	0.074277	0.062878	0.073122	0.1198	0.1077	0.12937	0.15509	0.16976	0.17853	0.13132	0.074033	0.14942	0.13318	0.11243	0.1323	0.09349	0.059621	0.07084	0.11297	0.031589	-0.040471	-0.072823	-0.0073484	-0.038754	-0.055805	-0.008515	-0.0022744	0.0083999	0.006424
0.016633	-0.018624	-0.0043822	-0.0011585	-0.08439	-0.070455	-0.077601	-0.027061	-0.029568	-0.019805	-0.03231	-0.019135	0.058792	0.069754	0.061631	0.056225	0.046055	0.054127	0.082576	0.056729	0.032873	0.065487	0.079581	0.088177	0.11426	0.11484	0.13783	0.11988	0.1048	0.1614	0.10285	0.067352	0.11731	0.16154	0.10471	0.15635	0.096331	0.049135	0.0096858	0.0645	-0.037716	-0.045261	-0.0070277	0.0011835	-0.022991	-0.031432	0.042535	0.074447	0.034116	0.005457
-0.0041753	-0.077013	-0.092309	-0.029308	-0.080401	-0.10973	-0.061948	-0.01739	-0.042062	-0.053001	-0.052863	0.0079615	0.080388	0.095287	0.08685	0.087736	0.096365	0.10441	0.15206	0.11299	0.1017	0.14414	0.13304	0.15849	0.15572	0.14645	0.15728	0.13226	0.12778	0.14782	0.12268	0.083353	0.13756	0.1286	0.12076	0.15285	0.087651	0.029518	0.0039529	0.063779	-0.019307	-0.031516	-0.047169	-8.3624e-05	-0.03973	-0.0014892	0.042475	-0.020303	-0.027173	-0.058477
-0.024321	-0.030624	-0.095596	-0.059237	-0.1044	-0.12146	-0.06922	-0.02866	-0.057212	-0.057884	-0.090999	-0.032521	0.037902	0.053895	-0.012283	-0.0017339	0.082464	0.074869	0.11589	0.1452	0.14377	0.19034	0.1856	0.19846	0.21281	0.18775	0.18819	0.15437	0.15119	0.19602	0.1854	0.14277	0.11728	0.09078	0.10217	0.10761	0.044578	-0.011481	-0.016097	0.028379	-0.020841	-0.0094283	-0.015278	-0.016916	-0.039726	0.0020131	0.045916	-0.012388	-0.043929	-0.10501
-0.024781	-0.010317	-0.052082	-0.011063	-0.070125	-0.081887	-0.031295	-0.0051012	-0.031999	-0.044922	-0.08213	-0.0048586	0.063041	0.1026	0.073381	0.058909	0.14414	0.14274	0.20245	0.20019	0.22164	0.26112	0.24146	0.25558	0.24805	0.20539	0.17701	0.16286	0.13562	0.17329	0.16496	0.12011	0.10173	0.037953	0.060349	0.073032	0.060644	-0.032282	-0.022934	0.014139	-0.034987	-0.046224	-0.067253	-0.05129	-0.03467	0.028312	0.031075	-0.041877	-0.035156	-0.076638
-0.037117	-0.031336	-0.088199	-0.06551	-0.078035	-0.084489	-0.073994	-0.015661	-0.045073	-0.041741	-0.090401	0.030469	0.099922	0.12327	0.073003	0.056933	0.13978	0.15121	0.22833	0.21381	0.24522	0.27347	0.26651	0.26062	0.26454	0.22029	0.18656	0.15655	0.14269	0.14026	0.11937	0.10597	0.087638	0.071083	0.053491	0.036012	0.035418	-0.04955	-0.035953	0.0054143	-0.031842	-0.078283	-0.052454	-0.037701	-0.081273	-0.036119	-0.020607	-0.060176	-0.071654	-0.078092
-0.00033623	-0.062497	-0.096813	-0.042708	-0.061111	-0.057108	-0.11182	-0.03212	-0.027315	-0.035116	-0.072676	-0.011914	0.074941	0.15064	0.075931	0.10244	0.13597	0.13439	0.21592	0.26572	0.28285	0.34864	0.3494	0.35301	0.36005	0.29674	0.21927	0.15633	0.11756	0.13047	0.080722	0.042795	0.02156	0.046305	-0.004695	0.026733	0.022418	-0.047562	-0.08314	-0.0047634	-0.04088	-0.10901	-0.073585	-0.098073	-0.088813	-0.028368	-0.0018931	-0.015616	-0.053087	-0.121
-0.030509	-0.10056	-0.11777	-0.073251	-0.062541	-0.097739	-0.12693	-0.034359	-0.044512	-0.026149	-0.051256	0.0041258	0.12039	0.12636	0.12556	0.13185	0.12477	0.16868	0.26607	0.2893	0.37462	0.42718	0.43191	0.42043	0.39752	0.34943	0.25321	0.16189	0.070208	0.04656	0.033874	-0.034064	-0.029127	-0.040755	-0.068284	0.018219	-0.024965	-0.13594	-0.098531	-0.036353	-0.10049	-0.14691	-0.094538	-0.086532	-0.1219	-0.046764	-0.051724	-0.06205	-0.087307	-0.12396
-0.0112	-0.084568	-0.11016	-0.055451	-0.052556	-0.058434	-0.11241	-0.05506	-0.010186	-0.013695	-0.0023092	0.032585	0.076099	0.12258	0.08577	0.12562	0.12096	0.1773	0.25086	0.30931	0.36516	0.4438	0.43779	0.43723	0.41976	0.34182	0.25595	0.15261	0.021495	0.023922	0.031908	-0.038534	-0.05772	-0.053335	-0.11765	-0.055416	-0.066939	-0.137	-0.12262	-0.10757	-0.16811	-0.16812	-0.14412	-0.13523	-0.10097	-0.057216	-0.039995	-0.084765	-0.093603	-0.11037
-0.052695	-0.098499	-0.10861	-0.058475	-0.037077	-0.073455	-0.13103	-0.088752	-0.060953	-0.029973	-0.011335	0.028068	0.092088	0.10501	0.080149	0.1531	0.13543	0.2124	0.24321	0.28586	0.39189	0.47868	0.48488	0.50774	0.46193	0.3693	0.29229	0.17299	0.029953	0.032743	0.060673	-0.057685	-0.053032	-0.0463	-0.13208	-0.039116	-0.073504	-0.1571	-0.13717	-0.10201	-0.1768	-0.17469	-0.16001	-0.12877	-0.12951	-0.075734	-0.045138	-0.12482	-0.096283	-0.11995
-0.066494	-0.11855	-0.12532	-0.051979	-0.056947	-0.05485	-0.11961	-0.071936	-0.059157	-0.015686	0.026225	0.046742	0.069416	0.099504	0.080541	0.1397	0.17768	0.21184	0.27604	0.29355	0.39989	0.51346	0.51483	0.52314	0.48092	0.41137	0.31782	0.20299	0.071299	0.066795	0.096442	-0.026194	-0.050299	-0.070952	-0.12977	-0.044918	-0.06673	-0.14146	-0.11364	-0.098767	-0.1941	-0.20463	-0.21667	-0.19085	-0.14211	-0.10938	-0.08281	-0.14246	-0.11372	-0.12426
-0.11133	-0.15216	-0.1726	-0.048493	-0.039075	-0.062866	-0.14202	-0.11316	-0.068064	-0.025991	-0.010845	0.033809	0.081204	0.12843	0.096558	0.17946	0.20967	0.24913	0.29795	0.34714	0.44287	0.55356	0.56852	0.56854	0.50563	0.44342	0.34186	0.19879	0.060851	0.016289	0.048752	-0.053333	-0.071003	-0.079928	-0.14822	-0.045659	-0.076056	-0.14243	-0.12349	-0.09897	-0.15667	-0.19895	-0.21295	-0.15431	-0.14927	-0.09868	-0.078197	-0.12096	-0.11241	-0.15559
-0.10706	-0.17057	-0.15572	-0.035953	-0.013843	-0.067107	-0.17642	-0.10877	-0.08303	-0.037682	-0.014158	0.031131	0.12168	0.13971	0.11197	0.18943	0.22514	0.28097	0.31685	0.34964	0.45696	0.559	0.58618	0.5812	0.52735	0.44993	0.33055	0.19481	0.040312	-0.0087484	0.02563	-0.058079	-0.082819	-0.10073	-0.14917	-0.071153	-0.076323	-0.1524	-0.11695	-0.11978	-0.15476	-0.19027	-0.23747	-0.16636	-0.14579	-0.079185	-0.070963	-0.10967	-0.11159	-0.16688
-0.10291	-0.1695	-0.13545	-0.032544	-0.0008254	-0.092733	-0.14718	-0.10506	-0.083271	-0.041078	-0.009657	0.028684	0.094734	0.109	0.1194	0.20445	0.24022	0.28246	0.32786	0.38376	0.49692	0.57842	0.60307	0.58911	0.52282	0.43389	0.2928	0.13439	-0.042045	-0.04115	-0.014251	-0.089054	-0.1348	-0.14408	-0.22263	-0.084494	-0.11022	-0.21083	-0.14088	-0.14489	-0.17821	-0.17826	-0.19007	-0.13069	-0.15092	-0.07331	-0.08245	-0.12389	-0.12481	-0.18055
-0.10614	-0.167	-0.12791	-0.034876	0.00010372	-0.060823	-0.12447	-0.10656	-0.08387	-0.038759	-0.016913	0.029254	0.089256	0.11087	0.12742	0.21794	0.21891	0.30052	0.33483	0.39302	0.48994	0.57436	0.60263	0.57532	0.53546	0.43464	0.28117	0.13217	-0.061752	-0.065736	-0.045265	-0.12998	-0.17431	-0.13905	-0.20645	-0.11853	-0.11993	-0.1986	-0.14158	-0.14672	-0.16117	-0.18958	-0.19092	-0.14776	-0.12374	-0.061351	-0.10922	-0.1289	-0.13145	-0.12693
-0.08686	-0.14647	-0.13241	-0.033234	0.025636	-0.039159	-0.081766	-0.065587	-0.051904	-0.025842	-0.015483	0.0088068	0.094685	0.096295	0.14449	0.22698	0.21778	0.2966	0.34625	0.40016	0.48954	0.55599	0.55646	0.53681	0.48441	0.38623	0.24687	0.10962	-0.068144	-0.076426	-0.041843	-0.14222	-0.19479	-0.17133	-0.20159	-0.11443	-0.11691	-0.17274	-0.13675	-0.15795	-0.15188	-0.20088	-0.2068	-0.17298	-0.13218	-0.069312	-0.11959	-0.12425	-0.12117	-0.11998
-0.066129	-0.1191	-0.12462	-0.062292	-0.049936	-0.05073	-0.073132	-0.081805	-0.070816	-0.017898	-0.027815	0.029518	0.090289	0.095008	0.11802	0.21889	0.21995	0.28207	0.30395	0.35821	0.45432	0.50492	0.51327	0.48614	0.43995	0.35879	0.2164	0.068778	-0.10308	-0.1021	-0.062266	-0.13663	-0.19747	-0.16027	-0.21282	-0.13387	-0.11589	-0.15561	-0.15354	-0.20327	-0.17579	-0.18765	-0.1692	-0.13282	-0.10494	-0.048967	-0.10524	-0.11841	-0.096632	-0.10112
-0.070489	-0.16821	-0.14234	-0.055522	0.0055908	-0.038394	-0.037618	-0.070897	-0.033591	0.029632	0.026717	0.034398	0.076709	0.11633	0.14762	0.19993	0.21485	0.2545	0.28415	0.34052	0.40818	0.46039	0.44948	0.42745	0.38278	0.30248	0.15864	-0.00045525	-0.097597	-0.12182	-0.10336	-0.14209	-0.19497	-0.1615	-0.20133	-0.13687	-0.12868	-0.13188	-0.13266	-0.1644	-0.14022	-0.14792	-0.12711	-0.11113	-0.094318	-0.058566	-0.094666	-0.1174	-0.098295	-0.071997
-0.12816	-0.1278	-0.16631	-0.077194	0.028334	-0.032613	-0.030712	-0.062853	-0.060264	0.0046019	0.025824	0.019157	0.047906	0.040062	0.060235	0.14824	0.16627	0.20297	0.22331	0.23964	0.28335	0.34334	0.33101	0.3101	0.27958	0.1934	0.090705	-0.015224	-0.09051	-0.1388	-0.14096	-0.13135	-0.1604	-0.17219	-0.17451	-0.14737	-0.14133	-0.16554	-0.10632	-0.17468	-0.12321	-0.11986	-0.082644	-0.093966	-0.087172	-0.066301	-0.09476	-0.11976	-0.082954	-0.040953
-0.081518	-0.14412	-0.13314	-0.046434	0.078837	0.027048	0.0045801	-0.059034	-0.070691	-0.027111	0.033026	-0.0016268	-0.023891	0.0076472	0.031295	0.13723	0.096277	0.11178	0.091099	0.14822	0.14109	0.17466	0.20804	0.2084	0.17647	0.1079	0.05976	0.013188	-0.05119	-0.064463	-0.10433	-0.080923	-0.11706	-0.11786	-0.11499	-0.083041	-0.061516	-0.041132	-0.074325	-0.14359	-0.058885	-0.047786	-0.039733	-0.062548	-0.072243	-0.045524	-0.087215	-0.027131	-0.055187	-0.048897
-0.095979	-0.090755	-0.062029	0.0056892	0.067096	0.034535	0.025711	-0.0054515	-0.072948	-0.034151	-0.033296	-0.018736	-0.023335	-0.021718	0.034197	0.081879	0.059887	0.026757	0.0373	0.03571	0.091514	0.11718	0.10306	0.097697	0.10397	0.05327	0.030652	-0.018967	-0.01928	-0.072148	-0.12229	-0.11942	-0.11547	-0.12555	-0.047064	-0.063266	-0.069248	-0.014308	-0.042158	-0.127	-0.0013707	0.012074	-0.030579	-0.031936	-0.017782	0.0026957	-0.0024857	-0.054045	-0.066914	-0.041395
-0.043786	0.002965	-0.0083851	0.049454	0.085186	0.042209	0.017291	-0.031118	-0.09194	-0.056892	-0.048079	-0.055129	-0.060348	-0.053722	-0.013079	0.025881	-0.040678	-0.01938	-0.0029155	-0.026709	-0.03259	-0.0046566	-0.0019526	-0.0099548	0.0088575	0.037023	0.0088791	-0.0096973	-0.01326	-0.097328	-0.094487	-0.069547	-0.10992	-0.077704	-0.037392	-0.052049	-0.072323	0.011615	0.0014459	-0.038459	0.048817	-0.016648	-0.0091674	-0.034552	0.016236	0.054643	0.011524	0.024786	-0.032983	-0.037725
0.0083515	0.0091303	0.053473	0.071246	0.11357	0.11154	0.066148	0.025322	-0.021864	-0.043769	-0.0037958	-0.0424	-0.042712	-0.082492	0.0061148	-0.022805	-0.053886	-0.051528	-0.087997	-0.11602	-0.10576	-0.10119	-0.1041	-0.11683	-0.087466	-0.013548	-0.037529	-0.032613	-0.048331	-0.10377	-0.09402	-0.071046	-0.086947	-0.061262	0.0018829	-0.021074	-0.10425	-0.0065375	-0.028366	-0.036354	0.055153	0.070564	0.02041	-0.023175	-0.0052555	0.074445	0.065208	0.011792	0.0052962	-0.041728
-0.012474	0.0033151	0.019549	0.033713	0.10187	0.12069	0.063545	-0.0065417	0.0017786	0.019761	0.036912	0.0056545	-0.056364	-0.043779	-0.00084376	0.0066731	-0.087314	-0.059122	-0.063177	-0.073595	-0.094671	-0.13465	-0.13293	-0.13257	-0.11335	-0.045948	-0.034996	0.0053543	-0.024464	-0.15402	-0.13359	-0.055959	-0.071321	-0.064529	-0.011518	-0.069536	-0.084073	-0.023522	-0.02883	0.0088791	0.090156	0.034744	-0.014005	-0.029516	0.029239	0.041699	-0.017704	0.02975	-0.0087613	-0.029433
0.043479	0.0081992	0.060004	0.052175	0.10179	0.15482	0.10353	0.039688	0.031494	0.044977	0.079102	-0.0048093	-0.086904	-0.07567	-0.012072	-0.0057023	-0.10916	-0.099958	-0.082568	-0.10067	-0.13107	-0.13208	-0.15213	-0.15036	-0.13922	-0.09118	-0.10529	-0.063002	-0.078661	-0.1552	-0.10866	-0.10345	-0.11097	-0.048061	-0.029504	-0.085328	-0.10481	-0.010293	-0.045745	-0.020491	0.056151	0.016832	-0.034098	-0.026237	0.0069412	-0.0272	0.0018842	0.027789	-0.014621	-0.040632
-0.05532	-0.010486	0.056137	0.028606	0.10042	0.15262	0.064514	0.013328	0.035903	0.047683	0.083743	-0.017474	-0.067828	-0.023411	-0.012377	-0.021687	-0.11756	-0.091921	-0.091708	-0.060388	-0.097485	-0.12342	-0.12161	-0.11641	-0.14587	-0.10403	-0.052899	-0.045916	-0.041857	-0.12993	-0.10639	-0.086195	-0.08769	-0.068941	-0.028064	-0.067441	-0.091763	-0.011617	-0.014849	-0.023519	0.0047981	0.014289	-0.030433	0.0092204	0.022784	-0.037959	-0.0030555	0.023585	0.0064804	0.021925
-0.072529	-0.0097642	0.0084698	0.039025	0.063205	0.083855	0.057662	0.011532	0.028196	0.018337	0.025014	-0.010725	-0.048248	-0.082917	-0.048288	-0.012661	-0.1063	-0.068277	-0.08148	-0.07562	-0.12381	-0.094851	-0.0818	-0.081997	-0.077133	-0.039258	-0.02601	-0.00041295	0.053915	-0.065774	-0.082158	-0.040964	-0.021082	-0.0032092	-0.028755	-0.060001	-0.088512	0.0058494	0.042576	-0.019119	0.020627	0.0033272	-0.036922	-0.033109	-0.01459	-0.036425	-0.016459	0.013222	0.033313	-0.0089676
-0.06511	-0.015909	0.0024352	0.0019209	0.054018	0.058802	0.035546	0.010683	0.0046898	0.046912	0.015195	-0.021111	-0.058961	-0.014725	-0.011262	-0.0034964	-0.074961	-0.071086	-0.084888	-0.033838	-0.078348	-0.051046	-0.031762	-0.051701	-0.010972	2.1845e-05	0.018564	0.0058886	0.041322	0.025235	-0.028355	0.018483	-0.0033496	-0.01421	-0.052055	-0.0619	-0.063381	0.030871	0.038122	-0.012276	-0.015167	-0.011018	0.013543	-0.031027	-0.023422	-0.040566	-0.044072	0.026526	0.042834	-0.021049
0.0049817	0.0068818	-0.029756	-0.015615	0.032725	0.014568	0.048048	0.011675	0.011702	-0.0024882	-0.0014234	-0.037069	-0.096131	-0.064909	-0.018681	-0.0020444	-0.097977	-0.1255	-0.13129	-0.048757	-0.084917	-0.10663	-0.079217	-0.078117	-0.051588	0.023468	0.065264	0.089171	0.077956	0.0035711	-0.020999	0.0021593	-0.0030805	0.023876	-0.014661	-0.099578	-0.065047	0.01033	0.091762	0.038309	0.055424	0.058883	0.01972	-0.072983	-0.049464	-0.055655	-0.044282	0.012939	0.04232	-0.014321
0.0096171	0.083199	0.052157	0.012864	0.051401	0.047464	0.072654	0.047108	0.019259	0.036325	0.022497	-0.037534	-0.12662	-0.026563	0.017423	-0.005339	-0.07753	-0.13034	-0.11365	-0.12424	-0.12198	-0.14244	-0.14229	-0.13531	-0.093789	-0.019114	0.0042206	-0.021015	-0.00018267	-0.061299	-0.017776	-0.019152	-0.021739	-0.057719	-0.034704	-0.054207	-0.073986	-0.0023984	0.034349	-0.0057281	0.0096742	0.034426	-0.0034768	-0.069784	-0.028602	0.0024236	-0.054801	-0.0047552	0.013888	-0.012673
-0.00082318	0.065757	0.06447	0.056719	0.048807	0.021882	0.10563	0.0248	-0.010918	-0.027549	0.0077898	-0.042472	-0.080702	-0.055757	-0.037823	-0.0092838	-0.063478	-0.11136	-0.088365	-0.10702	-0.14909	-0.15912	-0.14193	-0.11833	-0.12197	-0.037382	-0.030963	-0.044224	-0.028564	-0.042945	-0.06015	-0.022637	-0.043786	-0.038193	0.014977	-0.053117	0.041278	0.064032	0.034121	-0.009584	0.020331	0.038961	0.064685	-0.046973	0.029538	-0.0167	-0.0053581	0.04306	0.036949	0.03342
0.043987	0.076784	0.1031	0.11277	0.020781	0.07466	0.11883	0.060685	0.020598	0.029649	0.041791	-0.022297	-0.090437	-0.073389	-0.087257	-0.066943	-0.17418	-0.13527	-0.12752	-0.17911	-0.16654	-0.18056	-0.1617	-0.16984	-0.14373	-0.13972	-0.12525	-0.10262	-0.089194	-0.097077	-0.060725	-0.037824	-0.073851	-0.11153	-0.059552	-0.0080729	0.032331	0.039483	0.029091	-0.049928	-0.05483	0.041505	0.018967	-0.024699	0.014947	0.028432	0.02801	0.051415	0.042546	0.010792
0.067245	0.094112	0.088246	0.054788	0.033281	0.10294	0.10435	0.085004	0.065145	0.09111	0.051537	0.00752	-0.024434	-0.057612	-0.048778	-0.01009	-0.12024	-0.11356	-0.13445	-0.10526	-0.13526	-0.13999	-0.13628	-0.1672	-0.19497	-0.12059	-0.09717	-0.11044	-0.11168	-0.059402	-0.049511	-0.022532	-0.056725	-0.031567	-0.033871	-0.025774	0.0057392	-0.024747	0.036352	-0.035356	-0.054933	0.012974	0.0445	-0.029667	-0.031225	-0.081608	0.0098838	0.021106	0.03616	0.07173
0.029792	0.060538	0.088672	0.038094	0.06343	0.042815	0.044576	0.030914	0.045907	0.10005	0.065885	0.010582	0.014873	-0.037365	-0.013524	-0.0056979	-0.095192	-0.10634	-0.12371	-0.083032	-0.14542	-0.15986	-0.13419	-0.12982	-0.15033	-0.12151	-0.10796	-0.087646	-0.045089	-0.016553	-0.0248	0.014932	-0.022212	0.021167	0.0066547	0.011958	0.010529	0.026176	0.016282	-0.024456	-0.039742	-0.017863	-0.020288	-0.033445	-0.024144	-0.065902	-0.018079	0.066219	0.072209	0.070411
0.068284	0.09324	0.11169	-0.038865	0.010329	0.090773	0.042504	0.039723	0.080675	0.079597	0.067013	0.036021	-0.0075362	0.010266	-0.01752	-0.025064	-0.09877	-0.15467	-0.15714	-0.093074	-0.15221	-0.20459	-0.19556	-0.15157	-0.18999	-0.12744	-0.072627	-0.05326	-0.024146	0.034196	-0.0142	0.0058512	-0.012589	0.050566	0.031231	-0.037337	0.021191	-0.036605	-0.029177	-0.029946	-0.029255	-0.0056557	0.027626	-0.036538	-0.0052522	-0.094324	-0.017842	0.043177	0.023323	0.036877
0.051019	0.073962	0.036079	-0.033104	-0.00066131	0.080948	0.064023	0.035998	0.021831	0.04542	0.022544	-0.031382	-0.020697	-0.027337	0.029922	-0.016952	-0.044941	-0.053186	-0.04981	-0.042826	-0.10481	-0.12653	-0.11894	-0.090875	-0.11403	-0.11763	-0.063528	-0.093858	-0.074627	-0.041819	-0.02598	-0.01245	-0.059524	-0.025189	0.0026334	-0.055996	-0.033707	-0.056419	-0.03917	-0.033312	-0.022153	0.0096966	0.029404	0.031467	0.0020004	-0.02345	-0.0045959	0.020696	-0.0085604	0.033192
0.010474	0.025128	-0.033213	-0.075857	6.1144e-06	0.067632	0.068732	0.067277	0.090025	0.068079	0.056695	-0.010295	-0.031238	0.010979	0.02756	0.019431	0.00040683	-0.035207	-0.054734	0.0039752	-0.073767	-0.11958	-0.1047	-0.076989	-0.13383	-0.1317	-0.073704	-0.077659	-0.082247	-0.063711	-0.047561	-0.054197	-0.088055	-0.033591	0.0057591	-0.072989	-0.06303	-0.067079	-0.0069538	-0.0078753	0.0021456	0.02257	0.07191	0.02819	0.0089046	-0.019144	-0.045832	0.010424	-0.013284	0.054321
[truncated: 11 more columns]

## Sheet: Figure3D_OffsetLocked
0.019724	0.0085048	0.07598	0.072214	0.083904	0.0217	0.014163	0.033082	0.096857	0.012845	-0.016734	0.010187	0.050331	0.07633	0.072056	0.072907	0.096041	0.052666	0.029556	0.05875	0.085194	-0.007403	-0.0909	-0.21389	-0.27901	-0.2899	-0.25846	-0.24204	-0.24389	-0.18646	-0.13219	-0.066682	-0.065939	-0.039735	-0.033114	-0.03146	-0.013124	-0.038394	-0.015536	-0.03172	0.02261	0.036797	0.085451	0.10237	0.057111	0.055127	0.10258	0.040982	0.05399	0.096279
0.023498	0.0050875	0.057993	0.073843	0.050265	0.01497	0.018134	0.020478	0.064572	0.0046932	0.0040531	-0.0016444	0.058187	0.067937	0.052116	0.035961	0.065511	0.0068243	0.013577	0.051647	0.053871	-0.030981	-0.10559	-0.22308	-0.29186	-0.26621	-0.23974	-0.23583	-0.2492	-0.20822	-0.1211	-0.052238	-0.0011279	-0.0092889	-0.01371	0.039129	0.0584	0.026257	-0.0016234	0.0088468	-0.0039644	0.051788	0.12895	0.14476	0.096945	0.06456	0.10015	0.10173	0.041137	0.076835
0.082859	0.031417	0.1119	0.088342	0.075203	0.090408	0.050827	0.04258	0.042942	0.004057	0.021158	0.0083138	0.032717	0.10172	0.050301	9.1844e-05	-0.014588	-0.0037991	-0.014911	0.022493	0.0036618	-0.054338	-0.092491	-0.21778	-0.24361	-0.24218	-0.2342	-0.21428	-0.21848	-0.1929	-0.099809	-0.12698	-0.035206	-0.060117	-0.034533	0.0044535	0.034545	0.024611	-0.037317	-0.031013	-0.015817	0.053496	0.086681	0.07163	0.045824	0.075399	0.060741	0.034881	0.0077895	0.014846
0.089374	0.034679	0.12143	0.092229	0.079392	0.041418	0.043017	0.048362	0.026929	0.023454	-0.019894	-0.011319	-0.0070219	0.024557	0.011063	0.01185	-0.0028944	0.049938	0.029093	0.051523	-0.00084542	0.025828	-0.039483	-0.14279	-0.19151	-0.17791	-0.18216	-0.16306	-0.14418	-0.16288	-0.086313	-0.118	-0.10553	-0.065483	0.038992	0.029504	0.041339	0.052129	-0.014355	-0.010693	-0.048923	0.040836	0.044104	0.036327	0.040987	0.11347	0.041354	-0.0028509	0.015929	0.007143
0.04382	0.048551	0.084153	0.065974	0.06736	0.0076717	-0.017228	0.061056	-0.023342	-0.0031012	0.0035402	-0.05129	0.0096395	0.011787	0.0017731	-0.027495	-0.035232	-0.0037543	0.066427	0.086778	0.045824	0.011709	-1.4498e-05	-0.065458	-0.091835	-0.076735	-0.072796	-0.078532	-0.096439	-0.1088	-0.061765	-0.047701	-0.058596	0.0068583	0.018478	-0.0065241	-0.014708	0.006731	-0.0094173	-0.048543	-0.05788	0.0020383	0.053946	0.065433	0.086707	0.056056	0.055035	-0.00034254	-0.068131	-0.060143
0.023788	0.04	0.079122	0.089003	0.016986	-0.018711	-0.034884	0.0066926	-0.012697	-0.012586	0.0010663	-0.033678	-0.046005	-0.003044	-0.019947	0.02451	-0.046312	-0.04949	0.020748	0.025082	0.032577	0.02066	0.009752	-0.0070968	-0.039994	-0.033825	-0.040782	-0.035457	-0.038922	-0.033718	-0.024235	0.0073108	-0.011591	0.048696	0.026703	-0.0031735	-0.010145	0.0033831	-0.0064495	-0.074887	-0.068017	0.033641	0.055224	0.079965	0.056422	0.019376	0.016544	-0.048002	-0.040943	-0.063795
0.017699	0.017535	0.064203	0.031595	0.034691	0.022891	-0.041257	-0.010011	0.028479	0.030689	0.0023438	-0.047521	-0.072261	-0.04471	-0.024253	-0.0049832	-0.020243	-0.037683	0.031981	0.0015862	0.035835	0.007711	0.018136	-0.0050023	-0.018092	-0.031529	-0.010944	-0.037474	-0.030294	-0.042619	0.0083965	0.0079787	0.01741	0.051287	0.05484	0.021189	-0.0013505	0.013277	-0.028744	-0.066255	-0.040802	0.040761	0.053202	0.05532	0.058628	-0.012818	-0.00037547	-0.0098488	-0.054677	0.00084384
0.033578	-0.023092	0.022151	0.02377	-0.01829	0.00024933	-0.018269	0.014919	-0.010432	0.030658	0.038329	-0.032344	-0.078413	-0.034332	-0.036831	-0.0043029	-0.023602	-0.0086594	-0.0010231	-0.015399	0.054847	-0.010705	-0.0047059	-0.020877	-0.045583	-0.049598	-0.051404	-0.034179	-0.011819	0.0094741	0.060187	0.069546	0.033941	0.031159	0.022947	0.031119	0.022493	-0.018219	-0.040075	-0.033446	-0.021125	0.027695	0.060725	0.051175	0.037074	-0.0083819	-0.0036643	-0.055715	-0.035219	0.00051213
-0.020113	-0.032791	-0.005527	0.029563	0.0083415	0.041311	0.014348	-0.00081523	-0.070914	-0.024179	-0.0041447	-0.029782	-0.07316	-0.02524	-0.025666	-0.0365	-0.040945	-0.029122	-0.013445	-0.010803	0.028676	-0.042223	-0.040826	-0.070129	-0.081568	-0.045607	-0.041131	-0.018773	0.017714	0.041047	0.073964	0.11421	0.01142	0.033054	0.076133	0.10111	0.032788	-0.016924	-0.019836	-0.013313	0.061783	0.068843	0.080102	0.016358	-0.00018597	-0.022217	-0.025128	-0.078013	-0.055314	-0.0039123
0.0099041	-0.064614	-0.065495	0.012342	0.0035647	-0.0066595	-0.0023549	0.016885	-0.017378	-0.0069394	-0.022249	-0.056577	-0.057772	0.0070169	-0.0020587	-0.043274	0.031025	0.012029	0.034306	-0.0085558	0.026757	-0.066149	-0.055201	-0.040435	-0.03155	-0.033397	0.0013164	0.019291	0.032914	0.044213	0.086349	0.079546	0.0085258	0.035737	0.063887	0.07186	0.037372	-0.047939	-0.029815	-0.04419	0.06341	0.059975	0.022785	-0.014782	-0.035497	-0.084149	-0.034652	-0.078538	-0.018739	-0.0083973
-0.044015	-0.080628	-0.05418	0.020226	-0.016929	-0.045649	-0.060476	-0.024358	-0.038736	-0.081511	-0.053277	-0.07611	-0.067177	0.009489	7.4051e-05	-0.07963	-0.0092462	-0.034168	0.033618	-0.011954	0.042346	0.013282	-0.026487	0.012567	0.043147	0.039035	0.090505	0.11589	0.090259	0.09873	0.13631	0.14024	0.081099	0.10513	0.057626	0.0654	0.030048	-0.0087406	0.0062105	0.021156	0.047532	0.047778	0.042815	0.02494	0.03892	-0.05663	-0.019584	-0.032657	-0.028337	-0.021144
-0.088808	-0.09063	-0.078885	-0.026101	-0.092551	-0.072589	-0.085675	-0.068928	-0.05067	-0.053622	-0.040601	-0.11211	-0.094971	-0.031464	-0.02055	-0.047478	0.0054846	-0.056933	-0.03893	-0.0048836	0.077306	0.054236	0.026515	0.10317	0.17467	0.17407	0.23066	0.25159	0.21467	0.22013	0.20229	0.14615	0.083369	0.12176	0.058894	0.057003	0.044453	0.074626	0.089384	0.051562	0.065588	0.042252	0.026492	-0.0048023	0.032582	-0.089708	-0.072629	-0.040983	-0.0086565	-0.015588
-0.075347	-0.08347	-0.03583	0.013249	-0.081122	-0.095271	-0.092047	-0.1044	-0.13325	-0.058446	-0.034327	-0.12016	-0.11119	-0.073029	-0.06913	-0.1149	-0.099017	-0.097449	-0.074058	-0.028433	0.052139	0.025933	0.064294	0.16639	0.25977	0.27222	0.31292	0.31458	0.27566	0.27959	0.25319	0.18472	0.10598	0.12808	0.070518	0.081099	0.095587	0.06931	0.10875	0.088804	0.085354	0.029543	-0.01865	-0.034901	0.024259	-0.049549	-0.048073	-0.080286	-0.05849	-0.064532
-0.088651	-0.098754	-0.03475	0.011451	-0.040503	-0.096824	-0.13427	-0.12208	-0.15788	-0.084885	-0.0336	-0.098036	-0.088019	-0.10485	-0.083739	-0.10402	-0.13201	-0.07673	-0.06978	-0.01487	0.096782	0.060456	0.086122	0.21548	0.26839	0.30172	0.3223	0.33216	0.29011	0.28869	0.22773	0.17712	0.067255	0.11829	0.11744	0.10329	0.11297	0.086213	0.14564	0.12002	0.091815	0.0084114	-0.014053	-0.040799	0.024515	-0.0056546	-0.01023	-0.091765	-0.056395	-0.020049
-0.12255	-0.081062	-0.046814	0.023728	-0.0021756	-0.087146	-0.12229	-0.1427	-0.1812	-0.1438	-0.034078	-0.076114	-0.068741	-0.14123	-0.086213	-0.12153	-0.13958	-0.094773	-0.080595	-0.017217	0.074714	0.034943	0.082904	0.1807	0.21789	0.28139	0.28051	0.29874	0.23608	0.25924	0.20405	0.19618	0.11048	0.12766	0.089865	0.10554	0.10348	0.075355	0.1963	0.13408	0.091334	0.031189	-0.035682	-0.025582	0.021055	-0.016948	-0.051205	-0.089427	-0.081594	-0.027875
-0.12533	-0.12254	-0.058251	-0.034948	-0.06146	-0.10391	-0.16808	-0.18523	-0.175	-0.12991	-0.054772	-0.11097	-0.07142	-0.13986	-0.12277	-0.14089	-0.1398	-0.11011	-0.077744	-0.056982	0.045651	0.025512	0.082276	0.17988	0.24209	0.28947	0.29784	0.31355	0.2859	0.31553	0.26584	0.23828	0.15492	0.14718	0.1256	0.18216	0.10618	0.13466	0.20075	0.17737	0.12398	0.027616	-0.013735	0.018192	0.060887	-0.0073334	-0.013224	-0.06866	-0.037057	0.0070054
-0.15813	-0.14613	-0.097381	-0.044753	-0.097657	-0.13161	-0.1979	-0.19773	-0.17985	-0.13802	-0.064088	-0.1324	-0.10935	-0.15202	-0.096802	-0.0859	-0.085383	-0.1015	-0.11459	-0.055757	0.0082854	-0.0061315	0.091804	0.18366	0.22662	0.2759	0.28683	0.31798	0.27059	0.33133	0.27059	0.24335	0.21152	0.18382	0.16117	0.18764	0.15445	0.16218	0.23265	0.18201	0.13786	0.035035	0.0014079	-0.017855	0.10186	0.0053782	-0.013601	-0.041607	-0.058714	0.018042
-0.15398	-0.11883	-0.05813	-0.053331	-0.093945	-0.13951	-0.18503	-0.16822	-0.19156	-0.15511	-0.10213	-0.14787	-0.11073	-0.11587	-0.11827	-0.095989	-0.12257	-0.091235	-0.053894	-0.028543	0.064495	0.074255	0.08658	0.19713	0.21721	0.25963	0.2923	0.32898	0.30217	0.31132	0.2715	0.26769	0.2269	0.24834	0.19652	0.21281	0.20319	0.22204	0.2473	0.20116	0.12264	0.067627	0.044577	0.0351	0.035818	0.041196	-0.0060827	-0.040799	-0.036435	-0.03769
-0.13276	-0.086717	-0.063733	-0.049405	-0.086548	-0.11288	-0.14311	-0.137	-0.1691	-0.14619	-0.084486	-0.13408	-0.10474	-0.12218	-0.092428	-0.072783	-0.08029	-0.071174	-0.045635	0.016065	0.056687	0.074235	0.084215	0.15093	0.18168	0.20854	0.23619	0.27347	0.26327	0.27749	0.23884	0.25271	0.19732	0.19519	0.25422	0.27176	0.20364	0.21156	0.18933	0.19658	0.12525	0.11702	0.10091	0.073981	0.038255	0.032685	0.028092	-0.073079	-0.03835	0.0097005
-0.1232	-0.026306	-0.015467	-0.072126	-0.11829	-0.13478	-0.10838	-0.1377	-0.1399	-0.14208	-0.071057	-0.10237	-0.13609	-0.1448	-0.14354	-0.11733	-0.096817	-0.068711	-0.041468	0.021899	0.076525	0.077881	0.082313	0.15806	0.17977	0.23366	0.25032	0.25969	0.25297	0.25521	0.24962	0.23589	0.17349	0.15176	0.20859	0.2753	0.19373	0.17432	0.1683	0.19425	0.12689	0.11436	0.070333	0.062776	0.050895	-0.0051757	-0.016487	-0.06328	-0.040767	0.022399
-0.11678	-0.037998	-0.049886	-0.058391	-0.062993	-0.086551	-0.052048	-0.093514	-0.1218	-0.088029	-0.033105	-0.10636	-0.13958	-0.1095	-0.1303	-0.14666	-0.10742	-0.078794	-0.057135	-0.023875	0.070989	0.081554	0.047155	0.12584	0.15948	0.22546	0.24236	0.24297	0.24454	0.25718	0.26739	0.20505	0.14856	0.13297	0.1692	0.23047	0.15126	0.18621	0.18236	0.17068	0.16043	0.13409	0.046994	0.055106	0.051624	-0.033742	-0.040545	-0.064534	0.030727	-0.010881
-0.15378	-0.093237	-0.072661	-0.076336	-0.10528	-0.088833	-0.094407	-0.11004	-0.094361	-0.08429	-0.041818	-0.14572	-0.17624	-0.13288	-0.11645	-0.13193	-0.10729	-0.11157	-0.092452	-0.034223	0.063271	0.019729	0.042438	0.14065	0.15868	0.19669	0.25831	0.21843	0.22712	0.26529	0.29347	0.26464	0.19412	0.17279	0.1772	0.20373	0.11205	0.13322	0.16595	0.14388	0.10185	0.070771	0.027541	0.049135	0.057982	-0.010104	-0.036784	-0.044586	0.039554	0.028788
-0.18082	-0.11215	-0.076719	-0.075297	-0.099792	-0.1058	-0.11787	-0.1538	-0.13861	-0.12805	-0.088015	-0.16379	-0.17714	-0.14224	-0.11982	-0.10559	-0.10283	-0.10894	-0.045386	-0.014798	0.050614	0.049618	0.10767	0.19031	0.22546	0.28374	0.31619	0.31049	0.2993	0.32332	0.34612	0.3066	0.26794	0.26428	0.22598	0.22555	0.10909	0.17449	0.19263	0.17858	0.093651	0.041421	-0.0075998	0.044091	0.067764	-0.046574	-0.060526	-0.043451	-0.011018	-0.018362
-0.181	-0.13731	-0.076468	-0.066831	-0.12335	-0.15863	-0.19012	-0.16644	-0.17105	-0.1457	-0.093301	-0.19487	-0.20494	-0.15746	-0.10049	-0.075179	-0.083646	-0.070766	-0.040804	-0.011273	0.078471	0.083529	0.18155	0.2934	0.31933	0.36348	0.40366	0.36274	0.33009	0.32014	0.29867	0.25821	0.20881	0.19502	0.1753	0.14662	0.10355	0.1157	0.15866	0.12491	0.0088044	-0.020047	-0.026691	0.02201	0.05598	-0.0042314	-0.023165	-0.019218	0.0090256	0.0011583
-0.10465	-0.066961	-0.045652	-0.063754	-0.088075	-0.11633	-0.15458	-0.17836	-0.20122	-0.16975	-0.10378	-0.1875	-0.17719	-0.13308	-0.11335	-0.087693	-0.09098	-0.051651	-0.033988	-0.0045998	0.11193	0.087013	0.20626	0.3217	0.34157	0.40676	0.41108	0.38929	0.35212	0.3264	0.28595	0.24228	0.18855	0.17684	0.12385	0.13682	0.087977	0.10439	0.16916	0.13321	0.016532	-0.016258	-0.067481	-0.019251	-0.0070407	-0.011496	-0.014279	-0.0015962	-0.016739	0.0055155
-0.1675	-0.13107	-0.093695	-0.048757	-0.087012	-0.12795	-0.1888	-0.20834	-0.20805	-0.17568	-0.11618	-0.12795	-0.18962	-0.14733	-0.13693	-0.095653	-0.13419	-0.11253	-0.08372	-0.020051	0.079686	0.12037	0.26401	0.37287	0.40143	0.45668	0.46605	0.45952	0.40338	0.3816	0.31027	0.22364	0.16372	0.13923	0.14809	0.15486	0.097186	0.12441	0.17622	0.10679	0.030483	-0.039917	-0.084032	-0.011355	-0.0051052	-0.048066	-0.063884	-0.0086114	0.00046502	0.023507
-0.1475	-0.10834	-0.092372	-0.069357	-0.10456	-0.12115	-0.17159	-0.23312	-0.21924	-0.15909	-0.1044	-0.13891	-0.15587	-0.19967	-0.15554	-0.098404	-0.1218	-0.10189	-0.092157	-0.014195	0.071392	0.14413	0.26009	0.37524	0.43605	0.50197	0.47506	0.47077	0.42377	0.38021	0.29961	0.22191	0.1989	0.13582	0.12576	0.15852	0.11002	0.1309	0.17994	0.14828	0.057366	-0.017918	-0.10808	-0.061481	-0.0021144	-0.050896	-0.05473	-0.078953	-0.073216	0.0074364
-0.14031	-0.077899	-0.095087	-0.041116	-0.15334	-0.11462	-0.1696	-0.20262	-0.20741	-0.15278	-0.050546	-0.12488	-0.198	-0.16092	-0.13515	-0.11884	-0.13821	-0.10201	-0.10756	-0.015931	0.093486	0.15106	0.27369	0.41019	0.44563	0.51421	0.51493	0.5021	0.43597	0.39493	0.31843	0.23137	0.20216	0.15989	0.13389	0.14437	0.090542	0.15286	0.18945	0.13263	0.03316	-0.033749	-0.08561	-0.025694	-0.017584	-0.072566	-0.12873	-0.081521	-0.088775	-0.059505
-0.14551	-0.096379	-0.097605	-0.04348	-0.14155	-0.1093	-0.15873	-0.21085	-0.18898	-0.14242	-0.10172	-0.16478	-0.18244	-0.1773	-0.13161	-0.12692	-0.11937	-0.091049	-0.07887	-0.036609	0.078367	0.11151	0.26327	0.41769	0.46411	0.5372	0.51097	0.49569	0.4541	0.41236	0.34295	0.23919	0.22133	0.18008	0.1034	0.095099	0.054572	0.12724	0.17007	0.14311	0.025867	-0.055243	-0.11623	-0.084582	-0.014555	-0.072114	-0.10707	-0.11279	-0.082643	0.013805
-0.16106	-0.097434	-0.12576	-0.086409	-0.17329	-0.12145	-0.17271	-0.21982	-0.2531	-0.20622	-0.12196	-0.20095	-0.19766	-0.17412	-0.10147	-0.11192	-0.10026	-0.076624	-0.041781	-0.016321	0.08018	0.14887	0.30554	0.4611	0.51301	0.58053	0.54729	0.52297	0.47581	0.44998	0.35263	0.27745	0.26036	0.19161	0.1482	0.11964	0.095926	0.12442	0.18276	0.16225	0.030041	-0.048809	-0.097153	-0.062334	0.013889	-0.082195	-0.13377	-0.10537	-0.06088	-0.043734
-0.19097	-0.10825	-0.15058	-0.088272	-0.17023	-0.12897	-0.18012	-0.24744	-0.22771	-0.20653	-0.13948	-0.22713	-0.1899	-0.20187	-0.11579	-0.11015	-0.10654	-0.091249	-0.063978	-0.057832	0.074767	0.15504	0.30113	0.46793	0.55714	0.60309	0.58509	0.55452	0.49524	0.45341	0.36311	0.27793	0.23847	0.17327	0.11106	0.10466	0.10904	0.11887	0.17728	0.16268	0.045522	-0.045703	-0.11462	-0.083332	-0.012792	-0.093912	-0.10112	-0.080369	-0.07563	-0.022295
-0.1553	-0.10904	-0.12553	-0.099636	-0.19546	-0.18244	-0.18231	-0.23309	-0.22999	-0.19806	-0.12236	-0.20506	-0.18604	-0.17422	-0.12744	-0.11226	-0.094991	-0.071591	-0.072124	-0.016824	0.069452	0.19233	0.33658	0.5068	0.57973	0.62854	0.6021	0.55316	0.50054	0.44095	0.33311	0.2733	0.22276	0.17253	0.098268	0.10224	0.089818	0.13737	0.16769	0.17548	0.049024	-0.053791	-0.12919	-0.11291	-0.058701	-0.11201	-0.1619	-0.063109	-0.058922	-0.069612
-0.12853	-0.090847	-0.15382	-0.10879	-0.17396	-0.15639	-0.1805	-0.24653	-0.22788	-0.18408	-0.12502	-0.18586	-0.18329	-0.19185	-0.13613	-0.10688	-0.10737	-0.095016	-0.081904	-0.039164	0.10192	0.19376	0.34527	0.49254	0.58427	0.65518	0.60565	0.57455	0.50347	0.42344	0.33738	0.25014	0.19158	0.11946	0.075125	0.078402	0.05684	0.063563	0.15574	0.14607	0.039474	-0.065017	-0.12178	-0.12064	-0.079242	-0.096253	-0.11599	-0.080894	-0.10578	-0.055641
-0.10187	-0.066418	-0.14022	-0.10769	-0.16528	-0.15285	-0.17088	-0.23513	-0.20904	-0.15162	-0.10214	-0.15814	-0.16629	-0.18815	-0.15373	-0.11283	-0.11263	-0.092818	-0.073258	-0.0092784	0.081881	0.20326	0.34531	0.48839	0.59432	0.64516	0.60156	0.56544	0.49155	0.40697	0.29307	0.21822	0.15336	0.09369	0.043085	0.019279	0.024055	0.073005	0.12317	0.13787	-0.0012544	-0.097444	-0.16149	-0.12931	-0.093413	-0.091913	-0.11856	-0.093881	-0.11714	-0.065664
-0.1053	-0.049126	-0.12518	-0.078619	-0.14317	-0.13703	-0.17337	-0.20567	-0.20305	-0.14688	-0.10854	-0.12617	-0.13886	-0.18609	-0.13198	-0.069981	-0.086171	-0.062616	-0.050348	0.018089	0.10819	0.2489	0.37246	0.51973	0.6104	0.62698	0.57654	0.55686	0.48004	0.37693	0.27266	0.16416	0.13359	0.085034	0.029846	-0.024908	-0.042836	0.064017	0.1065	0.08243	-0.054908	-0.10207	-0.15213	-0.13909	-0.083274	-0.075575	-0.12719	-0.11053	-0.10026	-0.057195
-0.041968	-0.042652	-0.12041	-0.093514	-0.13593	-0.10567	-0.13948	-0.1292	-0.15927	-0.11471	-0.050792	-0.10001	-0.1282	-0.16407	-0.10152	-0.057067	-0.025051	-0.019648	-0.0043308	0.053505	0.11368	0.22085	0.34604	0.49108	0.55987	0.55415	0.50312	0.47006	0.39886	0.31622	0.22037	0.12465	0.10326	0.035853	-0.049392	-0.07874	-0.043214	0.017726	0.082242	0.033499	-0.075168	-0.126	-0.15502	-0.14156	-0.10713	-0.090317	-0.13545	-0.1084	-0.12443	-0.09072
-0.037067	-0.049085	-0.094295	-0.073845	-0.09395	-0.12387	-0.15004	-0.11855	-0.16197	-0.15369	-0.055974	-0.073128	-0.098085	-0.094886	-0.069142	0.015847	-0.017131	0.0022196	0.028471	0.064376	0.13282	0.21997	0.33664	0.50136	0.54167	0.52844	0.48759	0.43872	0.35132	0.2319	0.19013	0.09538	0.093345	0.043235	-0.017521	-0.058703	-0.027088	0.040344	0.059069	0.025438	-0.10275	-0.15813	-0.14943	-0.14135	-0.092103	-0.10941	-0.1458	-0.13045	-0.12905	-0.13343
-0.030766	-0.064819	-0.12141	-0.041756	-0.061627	-0.080108	-0.0671	-0.068049	-0.13401	-0.10415	-0.030374	-0.0031726	0.0048196	-0.03476	-0.018969	0.036969	0.010742	0.022861	0.031556	0.0489	0.082462	0.14747	0.2899	0.38211	0.38031	0.37504	0.33072	0.30919	0.22903	0.13819	0.11444	0.06432	0.040057	-0.00089088	-0.050902	-0.12585	-0.02751	-0.013562	0.015603	-0.064792	-0.097538	-0.1298	-0.11441	-0.09717	-0.094762	-0.10496	-0.11852	-0.091878	-0.12722	-0.10012
0.0037262	-0.040138	-0.089712	-0.079801	-0.06335	-0.023615	-0.019376	-0.032362	-0.097496	-0.057255	-0.030476	0.056628	0.072377	0.03207	0.027585	0.077892	0.05623	0.057515	0.036037	0.047512	0.051519	0.11855	0.19606	0.1926	0.16969	0.18532	0.11326	0.11269	0.064764	0.022933	-0.0082144	-0.0087281	-0.01649	-0.058857	-0.096274	-0.14202	-0.088117	-0.038851	-0.059558	-0.047864	-0.058845	-0.098873	-0.071297	-0.13324	-0.086658	-0.024447	-0.018184	-0.057802	-0.11002	-0.068647
0.060592	-0.0054136	-0.028777	-0.070846	-5.9957e-06	0.046846	0.068897	0.01224	0.011358	0.014815	-0.0067153	0.066044	0.15202	0.10116	0.088017	0.048256	0.053726	0.10003	0.029023	0.014555	0.027729	0.082086	0.085922	0.046894	0.0010361	0.039933	-0.0058383	-0.01328	-0.050791	-0.056623	-0.06962	-0.096619	-0.096509	-0.1315	-0.1348	-0.17546	-0.10279	-0.062991	-0.067154	-0.099043	-0.054217	-0.05093	-0.054738	-0.078055	-0.086159	-0.026261	-0.0061594	-0.032039	-0.047509	-0.069572
0.094481	0.030638	-0.018252	-0.040145	0.048902	0.11776	0.17603	0.11996	0.12171	0.061941	0.0022936	0.05814	0.15476	0.12815	0.092187	0.070856	0.034411	0.041755	-0.002348	0.01884	-0.052124	-0.034985	-0.019922	-0.0769	-0.091604	-0.073851	-0.12294	-0.098159	-0.10056	-0.13217	-0.11019	-0.14234	-0.12492	-0.16744	-0.15713	-0.15924	-0.044806	-0.027399	-0.083086	-0.057708	-0.038368	-0.0024472	-0.057829	-0.039601	-0.073621	-0.030702	0.0038225	-0.015398	-0.032434	-0.062037
0.046926	-0.013749	-0.017962	-0.040301	0.010925	0.067178	0.12483	0.062803	0.10578	0.056848	-0.025141	0.10693	0.14267	0.081552	0.055284	0.086155	-0.0095849	-0.025692	-0.028286	0.019001	-0.06823	-0.011342	-0.037558	-0.076618	-0.076046	-0.093152	-0.15734	-0.11167	-0.11106	-0.13308	-0.1348	-0.13776	-0.16009	-0.1212	-0.13268	-0.11989	-0.10936	-0.092838	-0.19424	-0.12742	-0.041328	-0.006258	-0.029354	-0.059989	-0.079881	-0.024842	0.019868	0.023734	-0.034156	-0.045585
0.093519	0.012399	-0.025819	-0.03645	0.037964	0.064508	0.09472	0.098935	0.11933	0.11165	0.051572	0.13283	0.11379	0.087865	0.0045632	-0.010233	0.015154	0.023308	0.0031632	-0.059901	-0.097893	-0.088592	-0.049848	-0.074894	-0.070097	-0.094415	-0.15061	-0.13284	-0.11993	-0.10831	-0.10714	-0.11361	-0.098204	-0.10687	-0.13844	-0.16548	-0.10917	-0.1034	-0.19428	-0.13206	-0.049527	-0.021362	-0.05848	-0.072353	-0.059029	-0.049092	-0.0013126	-0.024822	-0.089909	-0.067195
0.065305	-0.0003368	-0.037626	-0.06017	0.02297	0.066662	0.092548	0.078719	0.051888	0.064452	0.047904	0.12252	0.10081	0.076294	0.036278	0.015912	0.0054684	-0.0044556	-0.0023206	-0.035731	-0.12001	-0.085271	-0.065207	-0.072926	-0.065419	-0.11692	-0.13953	-0.11458	-0.086982	-0.086562	-0.086823	-0.071701	-0.090075	-0.038179	-0.058796	-0.10457	-0.068687	-0.060987	-0.12469	-0.11542	0.0022509	-0.0010927	-0.059245	-0.038316	-0.04088	-0.0023229	0.027791	0.026166	0.011141	-0.042479
0.05481	0.035816	-0.036016	0.0053434	0.072512	0.085056	0.060409	0.028396	0.057514	0.079706	0.036915	0.086603	0.07242	0.072025	0.0026585	0.013994	0.025775	0.0068739	0.0096035	-0.055111	-0.06505	-0.079571	-0.055275	-0.080203	-0.06994	-0.12648	-0.13542	-0.13621	-0.12989	-0.099377	-0.082585	-0.083684	-0.071905	-0.044098	-0.078576	-0.076885	-0.062245	-0.12797	-0.12303	-0.078053	0.0055273	-0.017527	-0.064964	-0.037174	-0.062862	-0.0090241	0.028011	0.0085172	-0.023639	-0.040174
0.061144	0.047858	0.0046823	0.021921	0.037743	0.073584	0.033406	0.023013	0.073591	0.082377	0.063795	0.11374	0.093613	0.076337	0.051576	0.063523	0.016535	-0.027374	-0.051857	-0.021294	-0.080564	-0.068124	-0.071157	-0.11356	-0.13778	-0.15942	-0.15944	-0.13403	-0.14325	-0.094986	-0.079721	-0.031813	-0.03132	-0.020246	-0.045994	-0.023218	-0.046451	-0.073918	-0.066371	-0.04212	0.027047	-0.03044	0.021803	0.013706	-3.7412e-05	0.072062	0.065226	0.030086	0.009663	-0.060993
0.052637	0.01908	0.0044167	0.03056	0.045277	0.06091	-0.016504	-0.016409	0.045527	0.088391	0.085624	0.055543	0.062606	0.017381	0.021184	0.010824	0.031733	0.017819	0.017755	-0.039861	-0.073156	-0.083423	-0.073113	-0.057775	-0.07551	-0.065607	-0.051238	-0.04918	-0.059896	0.019968	0.0057499	0.036392	0.073382	0.055771	0.0092836	0.051521	0.0093824	-0.041603	-0.025952	-0.054408	-0.021813	-0.062525	-0.03394	-0.019688	-0.0088116	0.035636	0.034722	-0.0081583	-0.031505	-0.009642
0.035124	0.001588	-0.0018637	-0.020002	0.0049163	0.020227	-0.015118	0.012446	0.035228	0.081918	0.039021	0.032983	0.034815	0.03631	0.033533	0.035774	0.021632	0.024526	0.050327	-0.037197	-0.1182	-0.074104	-0.087334	-0.048945	-0.032129	-0.029256	0.015245	-0.011196	0.021225	0.038403	-0.005302	0.0263	0.046826	0.064199	0.014762	0.010741	-0.094864	-0.014603	-0.062044	-0.029778	-0.025418	-0.057047	-0.017839	-0.023656	-0.021436	0.054884	-0.0071569	0.0013793	0.042889	-0.045581
0.051271	0.0097862	0.0017686	0.017002	-0.014151	-0.0019088	-0.011839	0.032803	0.066982	0.027613	0.045074	0.049167	0.07605	0.039066	0.031942	0.011907	0.022588	0.092421	0.048978	0.030567	-0.064081	-0.068938	-0.064675	-0.076947	-0.075494	-0.050813	-0.049108	-0.055313	-0.040583	-0.012039	-0.025235	-0.016126	0.022927	0.012389	-0.0063701	0.045012	-0.0040266	-0.036292	-0.03586	-0.0095292	0.0056442	-0.06827	-0.043757	-0.048019	-0.0043683	0.020283	0.0031669	-0.0014216	-0.02874	0.027045
0.095602	0.06042	0.02666	0.0074404	0.034939	0.070767	0.090371	0.070902	0.11811	0.1064	0.13016	0.13267	0.10867	0.091768	0.062963	0.072005	0.017975	0.021985	0.029785	-0.046793	-0.11855	-0.14096	-0.14557	-0.19646	-0.20244	-0.16858	-0.14791	-0.1716	-0.18798	-0.12875	-0.13126	-0.098026	-0.073565	-0.057879	-0.068439	-0.08265	-0.099037	-0.091135	-0.111	-0.066295	0.029446	-0.028964	-0.019057	-0.041906	-0.028226	0.010782	-0.022089	0.028011	-0.033041	0.022619
0.03763	0.035266	-0.021687	0.013947	0.068996	0.12734	0.11588	0.12673	0.14118	0.15527	0.10767	0.11562	0.09406	0.033023	0.012767	0.044079	0.049437	0.059356	0.015764	-0.002661	-0.092472	-0.084288	-0.10713	-0.19076	-0.17873	-0.20213	-0.20356	-0.20311	-0.15712	-0.13318	-0.16216	-0.14477	-0.10569	-0.077378	-0.084341	-0.10856	-0.078211	-0.060029	-0.074295	-0.068929	-0.0021733	-0.054031	-0.048937	-0.023659	-0.025445	-0.022434	-0.00073419	0.0096227	-0.0088405	0.0089908
0.013916	0.013307	0.013664	-0.046757	0.065315	0.10536	0.1432	0.10626	0.12138	0.12023	0.031347	0.10823	0.089865	0.065141	0.076283	0.03332	0.017442	0.042434	0.026491	0.0034706	-0.085623	-0.069085	-0.10123	-0.20148	-0.19279	-0.19675	-0.20222	-0.17805	-0.12851	-0.12178	-0.12937	-0.13261	-0.083224	-0.063116	-0.06932	-0.064973	-0.083993	-0.037161	-0.12159	-0.067813	-0.037983	-0.029877	-0.05396	-0.039238	-0.036446	-0.014941	-0.001187	-0.018806	-0.021069	-0.0341
0.073203	0.010881	0.021771	-0.02141	0.13322	0.10858	0.15846	0.11844	0.083448	0.093554	0.023629	0.078732	0.098724	0.073798	0.10065	0.065017	0.05055	0.039622	0.015758	-0.023883	-0.081486	-0.10657	-0.13175	-0.1784	-0.17565	-0.20576	-0.20306	-0.16642	-0.171	-0.1488	-0.16877	-0.11197	-0.062725	-0.087449	-0.10398	-0.10209	-0.064012	-0.041196	-0.088655	-0.076979	-0.042786	0.013886	0.010818	-0.012142	-0.0083357	0.039925	0.017463	0.022507	-0.046412	-0.035332
0.03089	0.023912	0.038041	0.0097069	0.075313	0.07245	0.084193	0.078411	0.079052	0.079493	0.018017	0.070428	0.10097	0.054218	0.073907	0.049176	0.010268	-0.0017042	0.037988	-0.049858	-0.072737	-0.097757	-0.10389	-0.15797	-0.11917	-0.14793	-0.14424	-0.12035	-0.098328	-0.1176	-0.12648	-0.073537	-0.091936	-0.058632	-0.074721	-0.08068	-0.076456	-0.045795	-0.068318	-0.073399	0.005297	0.01521	0.0079027	0.017236	0.0060067	0.077493	0.043437	0.021451	-0.037503	-0.0030356
0.067032	0.046027	0.002229	0.019551	0.015828	0.03132	0.059725	0.11434	0.031801	0.099092	0.042211	0.079597	0.093174	0.025583	0.044933	0.05346	0.07112	0.052276	0.034016	-0.010862	-0.093632	-0.087589	-0.089948	-0.038098	-0.023868	-0.050782	-0.073292	-0.035277	-0.025695	-0.065853	-0.085923	-0.066844	-0.067138	-0.05535	-0.12471	-0.13224	-0.10276	-0.06672	-0.069875	-0.042975	-0.024327	-0.057902	-0.016995	-0.041747	-0.012292	0.029	0.026627	-0.029786	0.0024446	-0.061096
0.061486	0.039647	0.010696	-0.011025	-0.048121	-0.01842	0.049215	0.081311	0.044695	0.084839	0.023208	0.047603	0.054512	0.022314	-0.021461	0.025415	0.063132	0.099383	0.079499	0.01742	-0.092689	-0.057522	-0.0315	-0.0088658	0.01086	0.0074358	-0.019366	0.0040414	0.021321	-0.02886	-0.043975	-0.054592	-0.05775	-0.011075	-0.057793	-0.099151	-0.0038681	-0.017398	-0.048037	-0.032462	-0.0028792	-0.050923	0.023442	-0.020379	-0.015923	0.0024597	-0.012355	0.021486	-0.023235	-0.040006
0.043504	0.028428	0.031416	0.033018	0.0024967	0.010759	0.079824	0.051291	0.038777	0.012963	0.030297	0.069221	0.08932	0.060761	0.0065757	-0.0053487	0.021896	0.02093	0.036041	-0.018869	-0.093831	-0.018401	-0.044771	-0.092721	-0.078656	-0.089737	-0.099693	-0.073897	-0.094975	-0.092106	-0.090803	-0.087353	-0.086727	-0.075347	-0.085758	-0.045577	-0.041712	0.0018506	-0.018274	-0.040245	0.013905	0.023753	-0.0050576	-0.025014	0.01143	0.018191	0.041732	0.016581	0.014632	0.012788
0.075839	0.08486	0.097876	0.1004	0.041667	0.026991	0.092712	0.048893	0.070613	0.073014	0.091579	0.073549	0.1061	0.043598	-0.029504	0.029692	-0.025219	-0.013066	0.021792	0.035129	0.0054466	-0.059117	-0.1398	-0.16112	-0.17061	-0.17895	-0.21234	-0.15561	-0.20524	-0.2387	-0.22112	-0.11975	-0.089951	-0.071412	-0.099658	-0.10223	-0.053936	-0.024321	-0.056592	-0.053379	0.02133	0.026917	0.0013617	-0.033561	0.065375	0.016371	0.0033761	-0.015273	0.016879	-0.017337
0.1052	0.0727	0.09193	0.039879	0.068505	0.062496	0.079395	0.042604	0.065789	0.020985	0.026874	0.053641	0.052073	0.018238	0.0098589	0.031389	-0.041675	-0.059594	0.042986	0.036755	-0.0062405	-0.085033	-0.1125	-0.13206	-0.14863	-0.19009	-0.1769	-0.16392	-0.18992	-0.20293	-0.16892	-0.054666	-0.064626	-0.0083299	-0.053629	-0.021496	-0.036769	-0.0092129	0.0019117	-0.045696	0.029586	0.030187	-0.0043075	0.037742	0.083634	0.031458	-0.017489	-0.0011396	0.0094098	0.013294
0.020332	0.045618	0.090972	0.095857	0.10282	0.029296	0.020729	-0.034443	-0.043819	-0.063227	-0.03572	0.0096844	0.063971	0.026554	0.013331	-0.012732	-0.019482	-0.015372	0.048585	0.018709	-0.0024768	-0.069275	-0.046212	-0.047214	-0.029479	-0.052947	-0.026788	-0.040003	-0.076835	-0.091459	-0.06807	0.010751	0.028095	0.052564	0.012058	0.012148	-0.008979	-0.035662	-0.0069328	0.016217	0.046206	0.050745	-0.024181	0.030595	0.043307	0.0008885	-0.038722	-0.011063	0.0073196	0.009708
0.050048	0.045974	0.1061	0.084012	0.076171	0.031291	0.024256	-0.016942	-0.024917	-0.06965	-0.016118	0.011908	0.045239	0.045797	0.055611	0.020366	0.042657	0.047004	0.039808	0.050633	0.050073	0.027972	-0.0093081	-0.0079433	-0.036343	-0.057397	-0.031661	-0.072973	-0.10956	-0.099205	-0.080047	-0.033327	-0.030863	-0.022443	-0.029301	-0.075561	-0.040171	-0.050476	0.0045256	-0.044786	0.013164	0.025675	0.01454	0.0515	-0.00029746	-0.045381	-0.058084	-0.0031284	-0.042377	-0.062141
[truncated: 11 more columns]
