# Supplementary material for: A generalized cortical activity pattern at internally generated mental context boundaries during unguided narrative recall
Source: eLife. 2022 May 30;11:e73693. doi: 10.7554/eLife.73693 (PMC9177147; doi:10.7554/eLife.73693)
Supplement: Figure 4—figure supplement 1—source data 1. [file elife-73693-fig4-figsupp1-data1.xlsx]

## Sheet: Figure4_supplement1
	Within-Within	Within-Middle
S1	0.0022821	0.018316
S2	0.014463	0.010666
S3	0.025538	0.029657
S4	0.10036	0.047458
S5	0.092068	0.033091
S6	0.087475	0.026682
S7	0.02353	0.017312
S8	0.11289	-0.017422
S9	0.025368	0.016234
S10	0.09069	0.0090445
S11	0.055637	-0.0084034
S12	0.0043262	0.022526
S13	0.061956	0.0092419
S14	0.083235	0.0021284
S15	0.01275	0.017012
