# Supplementary material for: A generalized cortical activity pattern at internally generated mental context boundaries during unguided narrative recall
Source: eLife. 2022 May 30;11:e73693. doi: 10.7554/eLife.73693 (PMC9177147; doi:10.7554/eLife.73693)
Supplement: Figure 4—figure supplement 2—source data 1. [file elife-73693-fig4-figsupp2-data1.xlsx]

## Sheet: Figure4_supplement2A
	Between-Between	Between-Within
S1	0.24403	0.13259
S2	0.52902	-0.2892
S3	0.6	0.046891
S4	0.70927	-0.14522
S5	0.55199	-0.51898
S6	0.83152	-0.098428
S7	0.69895	0.51679
S8	0.50924	0.021615
S9	0.62285	-0.44234
S10	0.65294	-0.2784
S11	0.59973	-0.36485
S12	0.35095	-0.41869
S13	0.73461	-0.014894
S14	0.6744	-0.0077396
S15	0.78231	0.39769

## Sheet: Figure4_supplement2B
0.0051552	-0.029193	-0.026931	-0.048626	-0.030026	-0.055751	-0.078903	-0.041659	-0.016671	0.034367	-0.014319	-0.034649	-0.025913	0.0020646	-0.030204	-0.040071	-0.076973	-0.037959	-0.01572	-0.0065213	0.055652	0.041606	0.037618	0.074318	0.12489	0.1449	0.14092	0.10752	0.11457	0.068959	0.055227	-0.0084876	-0.0087131	-0.037516	-0.0076201	0.0056807	-0.047567	-0.013455	0.011737	-0.026497	-0.019358	-0.030014	-0.065087	-0.041874	-0.023447	0.042959	0.014025	-0.0056713	-0.034085	-0.046592
0.025938	-0.019019	-0.048007	-0.055741	0.055543	0.030913	-0.018636	-0.0075698	-0.003729	0.020663	-0.041976	-2.4604e-05	0.0057101	0.009155	-0.0069879	-0.041079	-0.05315	-0.029909	-0.02219	0.012215	0.018059	0.013203	0.037367	0.039483	0.044388	0.086968	0.080033	0.045368	0.026558	-0.0011376	0.015269	-0.027603	-0.0018092	-0.066148	-0.016265	-0.0096924	-0.01715	0.0016851	0.007189	0.019316	-0.03986	-0.038396	-0.057899	-0.064329	0.0022991	0.028387	0.056647	-0.032901	0.015424	0.045035
0.036687	-0.064641	-0.035408	-0.040719	0.0097085	0.024465	0.0048609	0.024699	-0.0074415	-0.01185	0.020555	-0.011138	0.050122	0.023038	0.01138	0.0079618	-0.00090837	0.037886	-0.039795	-0.018044	0.028927	0.027634	0.0022643	0.0065975	-0.022102	0.01374	-0.0083975	-0.034295	-0.05199	-0.027292	0.029699	0.044493	-0.014738	-0.079381	0.012794	0.018693	-0.030905	-0.024253	-0.020506	-0.052745	-0.05002	-0.020468	-0.015973	-0.031551	0.011281	0.072774	0.043709	-0.022919	0.014966	0.024898
0.06014	0.032698	0.016103	-0.02443	0.050596	0.059325	0.055404	0.06759	0.040845	0.0090557	0.017194	-0.020842	0.038494	0.064024	0.062417	0.0013599	0.038949	0.058206	-0.0048987	-0.032775	-0.0065328	-0.029908	-0.073317	-0.095761	-0.15595	-0.11357	-0.11154	-0.1092	-0.10445	-0.10397	-0.048679	-0.053407	-0.081463	-0.048868	0.042553	0.025149	0.020154	0.037252	0.0041967	-0.052984	-0.011597	-0.01095	0.025198	0.02174	0.016186	0.041576	0.0017196	0.01554	0.071565	0.051833
0.02851	0.067005	0.073875	0.035312	0.015774	0.1008	0.093335	0.047433	0.055893	0.038045	-0.011444	0.0054143	0.010548	0.042533	0.11	0.046974	0.013829	0.052422	-0.045816	0.0010246	-0.015884	-0.018007	-0.018349	-0.13408	-0.21968	-0.16505	-0.18176	-0.16737	-0.15732	-0.11047	-0.087153	-0.074389	-0.071561	-0.063905	-0.0042857	-0.0012905	0.024768	0.012536	0.0036299	-0.0039594	-0.02202	0.037648	0.078632	0.072461	0.022704	-0.020127	0.008755	0.019015	0.00776	0.029848
0.048362	0.037495	0.055563	-0.0094401	0.029471	0.090545	0.073332	0.053283	0.090117	0.048452	0.014841	0.030816	0.016926	0.010775	0.071664	0.0094857	0.014759	0.080525	0.010559	0.048114	-0.0048043	0.012842	-0.025157	-0.10105	-0.14087	-0.12447	-0.14325	-0.14119	-0.10279	-0.080994	-0.05489	-0.084576	-0.065273	-0.037859	-8.5539e-05	-0.0043309	0.011343	0.027685	-0.06086	-0.020028	-0.048902	0.0070213	0.062939	0.042676	0.011348	-0.00326	-0.063358	-0.016902	-0.014294	-0.00023631
0.034298	0.053746	-0.01365	0.041338	0.021451	0.07134	-0.0019672	0.057069	0.096183	0.058745	-0.002147	0.045293	-0.012089	-0.025757	0.047146	-0.0027629	-0.0027742	0.066536	0.036327	0.059712	0.035027	0.098539	0.066143	0.018864	0.0064993	-0.0072131	-0.041745	-0.054532	-0.065877	-0.07116	-0.087678	-0.14926	-0.075422	-0.066952	-0.075514	-0.050807	-0.018439	-0.03704	-0.097427	-0.057585	-0.093786	-0.037007	-0.045344	-0.085067	-0.071509	-0.065122	-0.086106	-0.021799	-0.0441	0.0076922
0.026057	-0.0021868	0.0039853	0.01371	0.018413	0.037937	0.018843	0.012128	0.042564	0.025704	-0.0013102	-0.014494	-0.019034	-0.07802	-0.0033825	0.020249	-0.018995	0.04229	0.039542	0.067207	0.043765	0.094294	0.090596	0.075929	0.060324	0.07782	0.038347	0.022328	0.01215	-0.015773	-0.072774	-0.11628	-0.087505	-0.082754	-0.050189	-0.015294	-0.0065056	-0.00059843	-0.050924	-0.036131	-0.075787	-0.093834	-0.06958	-0.087212	-0.1058	-0.051412	-0.045419	-0.047602	-0.043615	0.042198
-0.066428	-0.037752	-0.016206	-0.0010964	-0.02674	0.0052897	-0.038709	0.021121	0.012818	-0.013874	-0.035243	-0.058247	-0.076871	-0.11081	-0.023289	-0.011297	-0.035458	-0.031907	-0.011852	0.079227	0.045813	0.077075	0.099226	0.10164	0.09702	0.10259	0.094611	0.088392	0.063894	0.062739	0.040001	-0.034858	-0.026509	0.0052657	0.029353	0.017976	0.026063	0.045555	0.039692	0.014053	0.041703	-0.030252	-0.030674	-0.069787	-0.03658	-0.050496	-0.060172	-0.019264	-0.042212	0.018747
-0.076723	-0.020948	0.012878	0.0021903	-0.04183	-0.044485	-0.075957	-0.090064	0.0019183	-0.091227	-0.094602	-0.067061	-0.059612	-0.062716	-0.0024456	-0.03572	-0.079059	-0.074873	-0.0094779	0.056204	0.046805	0.029757	0.068131	0.11227	0.12667	0.12555	0.11159	0.080307	0.083236	0.08367	0.0756	0.050506	0.0012977	0.013879	0.054477	0.072923	0.078766	0.0091519	0.052565	0.098291	0.069512	0.031502	0.015653	-0.005437	-0.009878	-0.024558	-0.04211	-0.022613	-0.023517	0.039588
-0.017399	0.038799	-0.022193	0.012838	-0.039234	-0.040077	-0.060431	-0.052472	-0.036486	-0.05363	-0.060895	-0.05232	-0.087022	-0.025888	0.017976	0.018279	-0.10837	-0.076789	-0.01278	0.014134	0.00037271	0.04644	0.12786	0.14995	0.16377	0.13959	0.14244	0.12191	0.12106	0.1271	0.024848	0.0076711	0.0018723	0.063023	0.068535	0.045133	0.02842	0.071513	0.076751	0.14966	0.053074	-0.037546	-0.075226	-0.04965	-0.037384	-0.063829	-0.10668	-0.021373	0.01966	0.02746
-0.040647	0.006547	-0.014542	0.0080025	-0.024416	-0.054926	-0.089621	-0.079979	-0.062602	-0.052776	-0.030987	-0.038292	-0.056016	-0.037315	-0.070385	-0.010685	-0.10934	-0.058486	-0.0075846	-0.018387	0.028494	0.023479	0.13532	0.13638	0.16279	0.17047	0.16551	0.13481	0.10963	0.12256	0.079896	0.057219	0.029061	0.033561	0.075391	0.048497	0.0017705	0.023284	0.028998	0.068076	-0.0053126	-0.052321	-0.10861	-0.059346	-0.046009	-0.068287	-0.083106	-0.024048	-0.0093224	0.079904
-0.036303	0.00033376	-0.030278	0.01004	-0.031137	-0.047822	-0.031934	-0.037832	-0.064049	-0.0095483	-0.020303	-0.047245	-0.055423	-0.048811	-0.055867	-0.076921	-0.095601	-0.069112	-0.070837	-0.035773	-0.0094508	0.059922	0.11043	0.098262	0.1187	0.14317	0.12321	0.10644	0.1054	0.078748	0.022316	0.0019499	0.0096569	-0.0029636	0.0043195	-0.028199	0.0074082	0.055658	-0.015135	0.029323	-0.0010877	-0.053827	-0.077241	-0.022515	-0.019518	0.0041097	0.00074476	0.040962	0.014805	0.008384
0.029811	0.058846	0.011199	0.026138	-0.019222	0.0071077	0.042402	-0.014604	-0.0053998	0.028241	0.01339	0.05614	0.050018	-0.021085	0.048314	-0.00060214	-0.019507	-0.0069635	0.0025035	-0.0011997	0.011955	0.074396	0.077663	0.02884	0.004555	0.011771	-0.03883	-0.017123	-0.0058024	-0.071426	-0.099014	-0.066919	-0.062983	-0.11727	-0.10509	-0.11943	-0.051479	-0.023566	-0.075752	-0.075175	0.0015625	-0.012352	-0.061764	-0.018528	-0.02201	0.044396	0.053823	0.012861	-0.058243	-0.050661
0.082643	0.13341	0.086007	0.032586	-0.0034378	0.039719	0.068488	0.074232	0.061947	0.11004	0.08097	0.092215	0.073503	5.9003e-05	0.061583	0.052464	0.069427	0.070345	0.052316	0.027126	0.011525	0.018567	-0.015506	-0.061607	-0.067085	-0.10279	-0.16823	-0.15643	-0.12255	-0.15265	-0.18415	-0.17655	-0.11941	-0.15703	-0.19239	-0.16648	-0.066868	-0.048013	-0.085407	-0.10322	-0.034672	-0.069223	-0.055889	-0.050009	-0.078873	-0.030737	0.03537	0.0019565	-0.047216	-0.017349
0.087376	0.10011	0.060016	0.020349	0.044133	0.091889	0.078484	0.10359	0.10329	0.062471	0.034474	0.07144	0.049534	0.053053	0.078958	0.097633	0.046977	0.021767	0.040561	0.018705	0.0184	-0.0047896	-0.085107	-0.15107	-0.14595	-0.2018	-0.18938	-0.19374	-0.14261	-0.19237	-0.19439	-0.17424	-0.12228	-0.14998	-0.13365	-0.097711	-0.070131	-0.086493	-0.14185	-0.14582	-0.09215	-0.0085429	-0.0037318	-0.0015389	-0.058713	-0.01432	-0.023925	0.0066504	-0.018313	-0.022199
0.060454	0.051693	0.035369	-0.0061881	0.073305	0.13112	0.10273	0.095888	0.098297	0.08521	0.017016	0.08115	0.030139	0.020553	0.033114	0.056977	0.038419	-0.0081841	0.0011729	-0.039108	0.0046317	-0.074927	-0.13686	-0.19767	-0.21818	-0.25425	-0.24095	-0.22264	-0.18331	-0.16604	-0.15083	-0.14658	-0.092775	-0.10234	-0.089578	-0.12174	-0.1093	-0.12712	-0.15365	-0.13036	-0.03773	0.017298	0.027431	-0.015929	-0.04224	-0.070148	-0.0095999	-0.018324	-0.034057	-0.069394
0.066441	0.050272	0.063343	0.025937	0.049636	0.069375	0.073163	0.089386	0.081664	0.031649	0.0071772	0.11825	0.051672	0.016509	0.025913	0.039204	0.0042726	0.0031225	-0.037581	-0.035851	0.0096777	-0.058997	-0.11969	-0.19122	-0.21503	-0.25048	-0.22823	-0.23428	-0.21202	-0.1602	-0.13153	-0.088066	-0.041213	-0.075601	-0.042863	-0.036548	-0.08168	-0.074869	-0.15266	-0.0937	-0.063061	0.034653	0.037289	-0.0081265	0.024535	0.0013109	-0.020232	-0.024992	-0.0095791	-0.022527
0.020516	0.024982	0.056522	-0.0042722	0.025541	9.8751e-05	0.015326	0.071078	0.027674	0.0077076	0.009639	0.054041	0.0045856	-0.0047844	-0.035224	-0.0069934	0.020984	-0.020543	-0.042046	-0.027543	-0.0049185	-0.07823	-0.15091	-0.18159	-0.19622	-0.20716	-0.19245	-0.16742	-0.1751	-0.11386	-0.064685	-0.022107	0.0022141	-0.0015541	0.005545	-0.03655	-0.066574	-0.021444	-0.073622	-0.071396	-0.023232	0.015711	0.088955	0.073255	0.088899	0.02559	0.01403	0.053324	0.037678	-0.010061
0.0056521	-0.0037116	-0.0036647	-0.052879	-0.016621	-0.0056696	-0.01055	0.0094544	0.013134	-0.027704	-0.014463	-0.017746	-0.018694	-0.0029439	-0.080647	-0.034859	0.0063973	-0.025945	-0.024629	-0.0069843	-0.0092892	-0.10275	-0.11696	-0.046659	-0.069247	-0.092764	-0.085032	-0.076988	-0.085072	-0.023848	0.010742	0.053377	0.063145	0.016822	0.0046271	0.0081016	0.032936	0.031423	-0.012696	-0.015155	-0.012265	0.025774	0.044932	0.099133	0.075271	0.067079	0.054233	0.018652	0.01259	-0.022252
0.02774	0.034505	0.04779	-0.035273	-0.037577	-0.04625	-0.028944	0.025612	0.036374	0.0275	0.041449	0.034444	0.039588	-0.0056304	-0.072253	-0.010675	0.027658	-0.0412	-0.0097963	0.0028659	-0.10187	-0.097027	-0.16796	-0.15315	-0.14765	-0.16259	-0.16451	-0.14873	-0.15304	-0.12195	-0.070995	0.029407	0.025187	0.029579	0.015507	0.026916	0.072869	0.01889	-0.04508	-0.023767	0.014015	0.038468	0.041961	0.064844	0.034748	0.058009	0.10097	0.050774	0.02484	0.032732
0.049846	0.059056	0.059387	-0.044157	-0.0079769	0.040931	0.035432	0.079014	0.10801	0.076227	0.030198	0.058959	0.028134	0.038715	0.0033232	0.053837	0.063235	-0.00045276	-0.0029772	-0.010006	-0.053183	-0.078413	-0.14295	-0.16031	-0.20573	-0.23896	-0.23947	-0.20661	-0.18339	-0.152	-0.15906	-0.073135	-0.050164	-0.043568	-0.02661	-0.029888	-0.0076411	-0.019851	-0.09225	-0.061991	-0.0029571	0.056897	0.083473	0.094823	0.03217	0.041364	0.12115	0.04717	0.020068	-0.013621
0.089585	0.058145	0.071705	-0.0024595	0.1117	0.10927	0.12859	0.12161	0.12644	0.094845	0.027097	0.052675	0.041829	0.035362	0.054611	0.033289	0.041318	0.012322	0.037512	0.049214	-0.040626	-0.048821	-0.13479	-0.21374	-0.23807	-0.2483	-0.23881	-0.24731	-0.20751	-0.17148	-0.15124	-0.11045	-0.067628	-0.062501	-0.074275	-0.022382	-0.0042309	-0.028064	-0.094631	-0.068854	0.0084201	0.048824	0.014627	0.0055548	0.0010952	-0.015143	0.055485	0.034435	0.049109	-0.0056917
0.087082	0.076009	0.030782	0.034142	0.081126	0.11774	0.11879	0.050184	0.050349	0.036808	-0.018189	0.029262	0.043673	0.024912	0.030451	0.047524	0.05447	-0.026384	-0.00024312	0.015725	-0.026815	-0.058644	-0.11646	-0.16731	-0.1812	-0.1798	-0.15803	-0.15698	-0.12511	-0.086626	-0.067955	-0.044996	-0.023738	-0.044261	-0.015528	0.018756	-0.0060139	-0.066474	-0.099266	-0.060171	-0.02626	0.026202	0.014898	0.0058629	0.019922	0.0023575	0.041838	0.0081108	0.03019	0.00037545
0.059051	0.057637	0.070933	0.04106	0.070124	0.10982	0.097555	0.051353	0.028486	0.048051	-0.024718	0.047734	0.034815	0.016515	-0.00034699	0.017619	0.054344	-0.014723	-0.013927	-0.0090255	-0.06736	-0.10796	-0.14685	-0.21475	-0.19245	-0.19642	-0.19415	-0.18691	-0.16234	-0.10459	-0.045607	0.0031362	-0.0022133	-0.0093433	0.015392	0.034575	0.050954	-0.064201	-0.065858	-0.036545	0.028561	0.039179	0.055153	0.072186	0.04951	0.021295	0.00682	-0.040956	-0.013916	-0.014131
0.010127	0.015238	0.05869	-0.0086025	-0.002936	0.043412	-0.0010167	-0.025062	-0.0029202	-0.038132	-0.015756	-0.0025461	-0.037542	-0.026712	-0.066343	-0.051178	0.0087	-0.015094	-0.02914	-0.030649	-0.017255	-0.044981	-0.048828	-0.04667	-0.02895	-0.035753	-0.032631	-0.040319	-0.025558	0.039528	0.055492	0.093578	0.12956	0.065018	0.072482	0.093907	0.071992	-0.030049	-0.01818	-0.0081776	0.051156	0.033059	0.019142	0.028197	0.0039727	-0.02746	-0.023472	-0.040583	-0.0086674	-0.023101
-0.010354	-0.044834	-0.030451	-0.055325	-0.0076145	-0.012049	-0.058709	-0.014478	0.0056139	0.0024003	0.014172	0.06086	-0.017722	-0.0020383	-0.018059	0.0087019	0.034486	0.028903	0.015126	-0.010116	-0.040158	-0.040764	-0.04061	-0.0016323	0.0065576	-0.024661	0.0067055	-0.050242	-0.023931	0.041658	0.030386	0.066495	0.10925	0.049479	0.010282	0.027755	0.026981	-0.037444	0.025125	0.055404	0.042891	0.029489	0.050018	0.015689	0.021951	-0.0019268	-0.0084899	-0.034651	-0.028537	-0.022077
0.054255	-0.011216	-0.060788	-0.026812	-0.010132	-0.021411	-0.041556	0.014701	0.037403	-0.010513	0.0080164	0.076315	0.063375	0.08141	0.070691	0.0051359	0.04682	0.066205	0.043144	0.038779	-0.057033	-0.020344	-0.031323	-0.022937	-0.07424	-0.07308	-0.078362	-0.097398	-0.074004	-0.018498	-0.049543	-0.017565	0.038847	0.011516	-0.020406	-0.026214	0.0081572	-0.034487	-0.043706	-0.03066	0.015785	-0.023724	0.0068908	0.017433	0.024587	0.059748	0.054502	0.033395	0.013811	-0.01271
0.093769	-0.025291	-0.056165	-0.032316	-0.019216	0.055885	0.043284	0.031626	0.062192	0.068015	0.051921	0.10789	0.092635	0.12815	0.11433	0.047935	0.09089	0.056829	0.0059547	-0.055477	-0.093988	-0.067759	-0.098301	-0.11933	-0.13501	-0.1583	-0.17501	-0.18122	-0.14489	-0.10714	-0.12061	-0.06874	-0.03047	-0.083727	-0.066601	-0.069223	-0.072355	-0.078325	-0.11883	-0.091044	-0.069282	-0.020875	0.05639	0.031641	0.052577	0.06128	0.10361	0.034684	0.034947	0.022236
-0.0018423	-0.045787	-0.052526	-0.026868	-0.050034	0.004863	-0.014416	0.012855	0.039177	-0.038883	-0.038923	0.010961	0.044829	0.066568	0.038491	0.035754	0.077623	0.036912	-0.021457	-0.035122	-0.027804	-0.039939	-0.078949	-0.11057	-0.13177	-0.15199	-0.17235	-0.13904	-0.10631	-0.038178	-0.0081119	0.017695	0.046389	-0.016388	-0.011568	0.037397	0.02783	-0.046091	-0.1081	-0.044858	-0.0099482	0.059721	0.11196	0.088187	0.15186	0.11828	0.094905	0.014344	0.042795	0.055774
0.0064807	-0.077651	-0.040731	-0.026438	-0.042105	-0.002422	-0.014034	0.015421	0.013894	-0.035606	-0.067525	0.019345	0.010204	0.016932	0.0011827	0.0031812	0.018172	0.023227	-0.08502	-0.086156	-0.059227	-0.06225	-0.10745	-0.098095	-0.10542	-0.16618	-0.16048	-0.09695	-0.072908	-0.03288	0.01522	0.045827	0.038569	0.023207	0.0276	0.093587	0.034583	-0.026208	-0.089863	-0.058598	-0.010304	0.031318	0.10078	0.076045	0.097113	0.073098	0.093133	0.0038571	0.053955	0.074752
0.032665	-0.02655	0.012359	0.021869	0.062727	0.049885	0.01698	-0.0035339	0.0045448	-0.098224	-0.084833	-0.0027918	0.051905	0.019352	-0.013556	-0.018047	0.0058296	-0.038062	-0.075953	-0.10712	-0.10398	-0.12419	-0.13445	-0.14178	-0.13752	-0.18726	-0.18819	-0.13917	-0.11151	-0.047108	-0.0098711	0.05523	0.073425	0.071187	0.04726	0.0565	0.085829	-0.019857	-0.055566	-0.008363	0.012736	0.059173	0.073976	0.031246	0.094969	0.092021	0.079234	0.061621	0.033338	0.097181
0.026483	0.013491	0.064349	-0.006615	0.073131	0.08124	0.013786	-0.0015103	0.013049	-0.044605	-0.016182	0.031257	0.037604	-0.0060883	-0.047069	0.014627	0.035543	-0.033591	-0.098005	-0.086271	-0.044569	-0.060845	-0.1452	-0.16785	-0.17323	-0.20709	-0.19338	-0.18124	-0.14785	-0.077518	-0.05453	0.0076919	0.036089	0.041465	0.059771	0.12072	0.094274	-0.040024	-0.07081	-0.018488	0.01171	0.079293	0.096255	0.083476	0.03979	0.029215	0.041937	0.043133	0.034471	0.023566
-0.0061158	-0.0371	0.018219	-0.020529	0.09054	0.080067	0.016296	-0.0075281	0.012606	-0.081466	-0.059799	0.032757	0.063338	-0.015981	-0.01281	0.02915	0.030031	-0.039979	-0.086495	-0.034768	-0.0080216	-0.013964	-0.1058	-0.13245	-0.1535	-0.17426	-0.14586	-0.16781	-0.13857	-0.036135	-0.021138	0.045948	0.045746	0.039407	0.087827	0.12185	0.1092	-0.0071241	-0.041992	0.0091137	0.044383	0.066755	0.10432	0.089283	0.071123	0.065178	0.038531	-0.010337	0.044326	0.047336
0.056609	0.0086726	0.025326	-0.0011253	0.074302	0.10206	0.039889	-0.00010254	-0.005042	-0.040088	-0.033056	0.035098	0.070104	-0.015959	-0.0012906	0.05006	0.070178	-0.0060259	-0.06477	-0.017811	0.0149	0.011411	-0.060029	-0.096866	-0.10774	-0.12824	-0.12306	-0.13354	-0.12233	-0.0729	-0.056306	0.041192	0.036867	0.054604	0.050953	0.1048	0.10268	-0.051694	-0.028431	-0.012283	0.026204	0.026784	0.093452	0.074942	0.089624	0.023299	0.036602	0.0060217	0.016901	0.066416
0.055141	0.0035748	0.027428	-0.011856	0.060668	0.03967	0.020594	-0.021426	-0.037655	-0.04236	-0.0097125	0.043076	0.051192	-0.013907	0.031919	0.038699	0.09081	0.0044503	0.0038838	1.0982e-06	0.01002	-0.029192	-0.068594	-0.078654	-0.088112	-0.091033	-0.080902	-0.11283	-0.10219	-0.070658	-0.012766	0.045656	0.073881	0.080195	0.092707	0.088776	0.074671	-0.034492	0.024398	0.029904	0.047249	0.015548	0.049338	0.056481	0.10419	0.05248	0.014737	-0.0034252	-0.023485	-0.037973
0.035337	0.051635	0.05929	0.033828	-0.049863	-0.026995	0.04868	0.025991	0.0064603	0.045874	-0.0080927	0.02003	0.013155	-0.027492	0.029868	0.029549	0.091962	0.11086	0.084398	-0.00088735	0.0088582	0.0045909	0.00085622	-0.030803	-0.050156	-0.063246	-0.052577	-0.081626	-0.044552	-0.044726	-0.045746	0.039655	0.029801	0.059375	0.069008	0.014142	-0.0097588	-0.038794	-0.020316	-0.014512	-0.0020156	-0.004928	-0.0063688	0.014596	-0.037448	-0.0084215	-0.050222	0.011869	0.00279	-0.063541
0.0048054	0.0067628	-0.00039362	0.0083979	-0.017926	-0.012245	0.031514	0.068136	0.01239	0.098947	0.045498	0.000126	0.039887	-0.0036993	0.027569	-0.01592	0.014497	0.025993	-0.012244	-0.01829	-0.037649	-0.020183	-0.048514	-0.05941	-0.056314	-0.042704	-0.07361	-0.071661	-0.024154	-0.018419	-0.081079	-0.034807	-0.0021933	-0.014894	-0.039648	-0.031678	-0.058287	-0.057307	-0.023105	-0.045799	-0.018245	-0.025325	0.012429	0.017014	-0.014698	0.034726	0.017388	0.024374	0.012076	0.00072817
-0.0056526	0.018064	0.020049	-0.0021333	-0.019861	0.024735	0.056949	0.068807	0.096331	0.082535	0.034781	0.03569	0.027494	0.010128	0.088415	0.017608	0.023502	0.0029117	-0.02044	-0.038678	-0.045796	-0.016536	-0.022764	-0.063534	-0.080327	-0.086978	-0.11073	-0.10607	-0.071479	-0.081145	-0.10079	-0.058854	-0.042063	-0.032015	-0.04991	-0.052665	-0.08415	-0.07652	-0.041777	-0.0094887	-0.0026472	0.002595	-0.015222	-0.0022022	0.018204	-0.00051573	0.0082884	-0.0032119	0.021814	0.010889
0.094438	0.099223	0.044651	0.036386	0.085428	0.10303	0.10914	0.11744	0.088883	0.092743	0.1062	0.083596	0.10308	0.036883	0.052056	0.023937	0.030979	0.002682	-0.016015	0.0096232	-0.015246	-0.066242	-0.074739	-0.097144	-0.12396	-0.12353	-0.15653	-0.15336	-0.10585	-0.12929	-0.17223	-0.17829	-0.17033	-0.16298	-0.11385	-0.11397	-0.083593	-0.10965	-0.064863	-0.086346	-0.031254	-0.00012541	0.00051017	0.0066842	-0.04327	-0.024644	-0.013019	-0.027536	-0.026637	-0.019751
0.061569	0.095105	0.071737	-0.0017708	0.027654	0.065119	0.12455	0.14605	0.092764	0.044757	0.073596	0.057791	0.077522	0.02851	0.06122	-0.0052215	0.020857	-0.048941	-0.018338	-0.040135	-0.058913	-0.051464	-0.13538	-0.14041	-0.089905	-0.13805	-0.14955	-0.15983	-0.12226	-0.13003	-0.14706	-0.13226	-0.14551	-0.12526	-0.09955	-0.062829	-0.10619	-0.1334	-0.11701	-0.041175	0.021052	0.052961	-0.015879	-0.038884	-0.013854	-0.037382	-0.022281	-0.040474	0.038174	0.012385
0.076619	0.080139	0.051368	0.04136	0.03454	0.026835	0.090265	0.1361	0.10148	0.070143	0.043156	0.020844	0.037759	0.013094	0.00096309	0.0017361	-0.0095162	-0.031537	-0.0054547	-0.0046099	-0.0064866	-0.044296	-0.076048	-0.092317	-0.069157	-0.12519	-0.11371	-0.11298	-0.085459	-0.13966	-0.16561	-0.15923	-0.17752	-0.13726	-0.089989	-0.10842	-0.12141	-0.090301	-0.068741	-0.044769	-0.015569	0.0064609	-0.01794	-0.070365	-0.070846	-0.076789	-0.04602	0.058447	0.056091	0.03987
0.038626	0.040166	0.030548	0.069402	0.032009	0.088786	0.089126	0.10478	0.066777	0.091042	0.079451	0.02497	0.018807	0.052236	0.1072	0.058463	-0.020176	-0.043969	-0.011696	0.013136	-0.03947	-0.040922	-0.056232	-0.069365	-0.11354	-0.14232	-0.1327	-0.1119	-0.084867	-0.11501	-0.18364	-0.16537	-0.13678	-0.11842	-0.061672	-0.093573	-0.072747	-0.0083691	-0.05334	-0.05057	0.0023718	-0.009761	-0.020628	-0.032277	-0.015497	0.010384	-0.0087023	0.06735	0.033661	0.01708
0.071002	0.072393	0.05281	0.076038	0.069062	0.077174	0.073171	0.057551	0.090114	0.075253	0.071356	0.085407	0.042227	0.041951	0.12329	0.04989	-0.026343	-0.037496	0.00028514	0.018076	-0.054704	-0.080832	-0.043655	-0.084866	-0.10798	-0.12748	-0.11503	-0.10922	-0.073122	-0.093561	-0.12936	-0.12441	-0.11005	-0.09373	-0.059051	-0.024504	-0.0073875	-0.03979	-0.010367	0.018118	-0.0056797	-0.0023247	-0.014249	-0.02146	-0.025264	0.010218	0.0038673	0.031404	0.0012609	0.053765
0.035773	0.071216	0.040787	-0.0055805	0.023764	0.057488	0.078592	0.067848	0.11022	0.13278	0.085963	0.11323	0.049812	0.022653	0.078871	0.067881	-0.011745	0.0039214	0.0074011	0.023045	-0.025003	-0.018082	-0.050719	-0.11715	-0.083995	-0.07758	-0.070552	-0.097555	-0.05411	-0.082457	-0.10996	-0.12051	-0.11914	-0.14348	-0.10675	-0.053017	-0.051068	0.0055483	-0.012501	-0.040915	-0.046098	-0.029871	-0.034207	-0.021664	-0.030072	-0.0019533	0.026947	0.0018803	-0.0056355	0.031317
0.11247	0.13402	0.04125	0.012844	0.039691	0.056384	0.07445	0.080598	0.08945	0.12485	0.08474	0.081382	0.034991	0.062355	0.12143	0.072713	0.03569	0.032013	0.034634	0.031921	-0.0051278	-0.035687	-0.10993	-0.13192	-0.12267	-0.092866	-0.084525	-0.1234	-0.10557	-0.092019	-0.1066	-0.088619	-0.10266	-0.11009	-0.10829	-0.11574	-0.10202	-0.063959	-0.076234	-0.11524	-0.10226	-0.043449	-0.015384	-0.026449	-0.044902	-0.017521	-0.016143	0.026942	0.030897	0.0083494
0.046851	0.075162	0.026344	0.011885	0.018287	0.070067	0.089473	0.099693	0.10659	0.12891	0.021692	0.069776	0.026697	0.044904	0.13094	0.10712	0.090722	0.091043	0.065988	0.075458	-0.038117	0.013943	-0.048405	-0.13013	-0.13026	-0.12259	-0.12937	-0.12678	-0.11311	-0.12112	-0.10714	-0.13045	-0.1192	-0.15934	-0.1215	-0.10075	-0.11728	-0.039795	-0.10544	-0.097844	-0.11859	-0.014652	0.014032	-0.015825	-0.038209	-0.046262	-0.061049	0.025772	0.00054037	0.011763
0.05371	0.067267	1.7419e-06	0.013809	0.00051023	0.042285	0.085076	0.11238	0.11216	0.13786	0.0057116	0.016392	0.058112	0.087877	0.075563	0.035659	0.050033	0.040815	0.024292	-0.0081789	-0.033429	-0.028619	-0.10008	-0.12469	-0.089182	-0.12657	-0.12043	-0.12194	-0.10255	-0.11572	-0.096165	-0.13378	-0.09558	-0.10712	-0.087552	-0.047288	-0.038923	-0.0091643	-0.092524	-0.054951	-0.031808	0.043161	0.08324	0.054303	-0.0068991	-0.026649	-0.018392	0.016969	0.047197	0.066199
0.035224	0.041165	-0.017217	0.038957	0.009384	0.033901	-0.0053138	0.11689	0.071259	0.079732	0.018272	0.0025654	0.018906	0.0043256	0.046692	0.057735	0.051786	0.069841	0.017116	0.067419	0.0091354	0.076069	-0.001915	-0.047337	-0.085934	-0.10095	-0.08735	-0.10025	-0.059168	-0.10371	-0.11507	-0.12932	-0.080213	-0.090811	-0.060598	-0.052306	-0.069249	0.046756	-0.052019	-0.071257	-0.038095	-0.011869	0.047319	0.057732	0.02248	0.013963	-0.017318	0.030735	0.048128	6.0507e-05
0.0465	0.02594	0.0055006	0.022684	0.015986	0.043506	0.026171	0.11792	0.10911	0.094109	-0.0049172	-0.040877	0.011267	0.058989	0.048354	0.047966	0.0080528	0.0033252	0.028578	0.10088	0.01667	0.029723	-0.0087921	-0.056526	-0.078019	-0.089388	-0.096889	-0.085403	-0.093751	-0.096528	-0.081945	-0.12329	-0.083832	-0.11117	-0.069221	-0.07723	-0.0075486	0.052436	-0.032308	-0.04727	-0.062747	-0.05394	-0.010862	0.041034	0.031124	0.051107	0.098329	0.046836	0.012753	0.041096
0.052609	0.0012736	0.037624	-0.0069718	0.024169	0.045412	0.087031	0.12018	0.13492	0.14292	0.0097943	-0.051183	-0.011308	0.057107	0.052269	0.022	-0.021553	-0.00092561	-0.0024857	0.044867	-0.048803	-0.0076609	-0.053759	-0.10899	-0.14184	-0.15548	-0.16299	-0.12127	-0.1041	-0.11927	-0.10066	-0.073814	-0.066457	-0.051838	-0.067452	-0.069131	-0.036367	0.032387	-0.01839	-0.040644	-0.0085851	0.01996	0.055152	0.052285	0.020549	0.063984	0.064718	0.030549	0.075898	0.012253
0.046216	0.10636	0.098764	0.075285	0.017542	0.08634	0.038873	0.075269	0.080333	0.077974	-0.003421	0.037174	0.018712	0.033934	0.0034269	-0.0063082	0.020127	0.044714	0.056717	0.047593	0.0011919	-0.064304	-0.0592	-0.13204	-0.17846	-0.16263	-0.17897	-0.1857	-0.14313	-0.14722	-0.07364	-0.079971	-0.077951	-0.040351	-0.045491	-0.085656	-0.056329	-0.036386	0.018526	-0.016734	0.024485	0.013972	-0.0012078	0.039678	0.0043535	0.023885	0.082717	0.030497	-0.043625	0.013855
0.052973	0.082337	0.10607	0.08861	0.050915	0.042315	0.094685	0.041737	0.073464	0.10805	0.057756	0.063916	0.034665	0.07998	0.015359	-0.023618	-0.019244	0.081228	0.10732	-0.0093583	-0.027634	-0.06772	-0.11156	-0.17353	-0.16024	-0.15759	-0.1776	-0.19771	-0.19334	-0.13937	-0.10985	-0.11146	-0.112	-0.06067	-0.049377	-0.083054	-0.078209	-0.032511	-0.061368	-0.039125	0.0074654	0.02526	0.019453	0.012443	-0.014001	0.026317	-0.012715	0.0035307	-0.0097511	-0.008033
-0.010452	0.053275	0.058853	0.12605	0.071187	0.059851	0.027588	0.05252	0.052239	0.043308	0.037291	0.0063894	-0.010105	0.0474	0.011088	0.0012635	0.015752	0.019238	0.090202	0.044484	0.023523	-0.036653	-0.099762	-0.12242	-0.12169	-0.14972	-0.11302	-0.15058	-0.14833	-0.15533	-0.10353	-0.091564	-0.10799	-0.077006	-0.052994	-0.11547	-0.094254	-0.076614	-0.082709	-0.082703	-0.076985	-0.036791	0.00064933	-0.005864	0.030885	0.014394	-0.027417	0.027445	-0.021426	0.07218
0.045119	0.054198	0.06122	0.074489	0.10357	0.052055	0.048263	0.040258	0.096631	0.0914	0.073232	0.066075	0.029037	0.09325	0.058686	-0.0062247	-0.0067997	0.052904	0.12283	0.021229	-0.028092	-0.096053	-0.13637	-0.18584	-0.19073	-0.20309	-0.20334	-0.18518	-0.17913	-0.18415	-0.13271	-0.12194	-0.077715	-0.055078	-0.043186	-0.11216	-0.09068	-0.04098	-0.081989	-0.064065	-0.020199	-0.038308	-0.048173	-0.055462	-0.0075166	0.026298	0.050829	0.071581	0.027986	0.034853
0.027487	0.074055	-0.012577	0.010748	0.052172	0.023663	0.012981	0.077391	0.088591	0.032944	0.044653	0.023496	0.012622	0.085589	0.066202	0.032709	0.05174	0.040014	0.085193	0.0091399	-0.030577	-0.1194	-0.13897	-0.11766	-0.12331	-0.12955	-0.10931	-0.14696	-0.1109	-0.12188	-0.080887	-0.051197	0.022623	-0.035876	-0.060055	-0.10265	-0.074444	-0.082123	-0.080804	-0.026657	-0.050929	-0.043462	-0.014606	-0.02026	0.027581	0.098537	0.083888	0.065259	0.023587	0.082642
0.036964	0.0041019	0.036258	-0.030568	0.0016292	-0.0023489	0.015893	0.064737	0.15363	0.044227	0.024134	0.012077	0.048848	0.10684	0.082808	0.061072	0.064039	0.035201	0.097396	0.015543	-0.056511	-0.10847	-0.15211	-0.15513	-0.13771	-0.17224	-0.16448	-0.15324	-0.15111	-0.13928	-0.098164	-0.04168	0.058856	0.011684	-0.044292	-0.073177	-0.046121	-0.023062	-0.10365	-0.060357	-0.011914	0.0054822	0.00089173	-0.0011212	0.059535	0.072195	0.063957	0.048545	0.063943	0.036746
0.070464	0.048665	0.017549	0.028084	0.055707	0.037804	0.088868	0.09564	0.14652	0.022399	-0.013224	-0.0068107	0.059508	0.13971	0.076363	0.0080601	0.030247	-0.006286	0.071115	0.019601	-0.040293	-0.11534	-0.15572	-0.16826	-0.17423	-0.1752	-0.14686	-0.1553	-0.15189	-0.13342	-0.050559	-0.064625	-0.034961	-0.0094564	-0.030071	-0.036207	-0.018396	-0.06882	-0.064079	-0.020928	-0.012701	0.060421	0.0081475	0.015358	0.029774	0.014718	0.050191	0.029053	-0.010344	-0.025147
0.034042	0.034521	0.079575	0.02733	0.091617	0.038964	0.072113	0.054363	0.093905	0.0086559	0.045352	0.045569	0.033481	0.076553	0.057896	0.0014548	-0.02119	-0.0041551	0.010622	-0.020128	-0.045597	-0.084829	-0.12506	-0.14464	-0.16401	-0.18081	-0.14755	-0.18819	-0.18967	-0.12046	-0.091596	-0.094163	-0.065116	0.0094036	-0.030207	-0.065342	-0.060151	-0.078649	-0.057602	-0.08049	0.0006495	0.041299	0.055252	0.026643	-0.027109	-0.041963	0.021762	0.0087639	0.0061115	-0.041219
0.047512	0.010822	0.092079	0.0048215	0.062144	0.039172	0.030997	0.053692	0.078197	0.018321	0.069154	0.040578	0.064001	0.069546	-0.0023664	0.0017745	0.015011	-0.001245	0.00079281	0.0093027	-0.056157	-0.08137	-0.089368	-0.08639	-0.15161	-0.15204	-0.13355	-0.16394	-0.18632	-0.16414	-0.12329	-0.086921	-0.076646	-0.049362	-0.067778	-0.053516	-0.039349	-0.067256	-0.055604	-0.067964	0.0028178	0.024672	0.01757	-0.038859	-0.074721	-0.029526	-0.0043149	-0.010349	-0.022412	-0.051667
-0.018686	0.01808	0.067666	0.0072001	0.026431	-0.019558	-0.034168	-0.014485	-0.067664	-0.065239	-0.009837	0.0031494	-0.0073738	0.0063013	-0.05744	-0.078692	-0.025508	0.00070257	-0.027137	-0.040237	-0.026257	-0.068228	-0.0074072	0.015594	-0.010306	-0.031733	-0.0072155	-0.048442	-0.099618	-0.048289	-0.04067	-0.020255	-0.031345	-0.032367	-0.033542	-0.02129	0.001177	-0.10702	-0.022685	-0.021158	0.042219	0.010741	0.012349	-0.02044	-0.022769	-0.063976	0.021532	0.0082064	-0.0032045	-0.017555
[truncated: 11 more columns]
