# Supplementary material for: A generalized cortical activity pattern at internally generated mental context boundaries during unguided narrative recall
Source: eLife. 2022 May 30;11:e73693. doi: 10.7554/eLife.73693 (PMC9177147; doi:10.7554/eLife.73693)
Supplement: Figure 4—source data 1. [file elife-73693-fig4-data1.xlsx]

## Sheet: Figure4A
	Between-Between	Between-Within
S1	0.40223	-0.29513
S2	0.77983	-0.52372
S3	0.69922	-0.096725
S4	0.72844	-0.33081
S5	0.66931	-0.50084
S6	0.87663	-0.20994
S7	0.7501	-0.061484
S8	0.79405	-0.26876
S9	0.60236	-0.4431
S10	0.79315	0.079081
S11	0.69357	-0.27115
S12	0.76826	-0.24356
S13	0.75311	0.054707
S14	0.81971	-0.41175
S15	0.80871	-0.14673
