# Supplementary material for: A generalized cortical activity pattern at internally generated mental context boundaries during unguided narrative recall
Source: eLife. 2022 May 30;11:e73693. doi: 10.7554/eLife.73693 (PMC9177147; doi:10.7554/eLife.73693)
Supplement: Figure 5—figure supplement 1—source data 1. [file elife-73693-fig5-figsupp1-data1.xlsx]

## Sheet: Figure5_supplement1A_Run1
NaN
NaN
NaN
NaN
NaN
NaN
NaN
NaN
NaN
NaN
-0.063819
-0.020446
0.112
0.27622
0.44973
0.5671
0.65348
0.60542
0.46912
0.59382
0.93747
1.1226
1.2213
1.1828
0.49969
-0.67694
-1.6398
-2.0785
-1.8943
-1.0774
-0.05976
0.51829
0.48766
0.29531
0.20173
0.12582
0.027526
-0.09751
-0.066603
0.18105
0.37738
0.34305
0.088011
-0.12043
-0.026223
0.15221
0.2169
0.23495
0.32632
0.47428
0.5427
0.52379
0.38851
0.28145
0.28499
0.29793
0.27975
0.209
0.13353
0.11298
0.24058
0.37785
0.34588
0.30308
0.26634
0.18513
0.077969
0.067183
0.090734
0.0726
0.092345
0.20033
0.44783
0.66373
0.71354
0.54406
0.23472
-0.069326
-0.22141
-0.23779
-0.24328
-0.2672
-0.44907
-0.6768
-0.67547
-0.52788
-0.45249
-0.51553
-0.54934
-0.4283
-0.32449
-0.49661
-0.74324
-0.60062
0.036392
0.72075
1.0578
1.1154
1.0138
0.82457
0.55618
0.42842
0.61827
0.93794
1.0556
0.95522
0.87389
0.87728
0.91878
0.82546
0.55356
0.059543
-0.69367
-1.3444
-1.5958
-1.2402
-0.53636
-0.29547
-0.61923
-1.0537
-1.3066
-1.3396
-1.2468
-1.1341
-1.0916
-1.0744
-1.0336
-0.90509
-0.73846
-0.54021
-0.39895
-0.41648
-0.3208
-0.13638
-0.17717
-0.5544
-1.0183
-1.3098
-1.2708
-0.9727
-0.73533
-0.56796
-0.35111
-0.21336
-0.2579
-0.40837
-0.5759
-0.77884
-0.96697
-1.0695
-1.0952
-1.0331
-0.95963
-0.84513
-0.62945
-0.34575
-0.024898
0.12744
0.14841
0.22739
0.30909
0.15905
-0.2735
-0.75849
-1.0332
-0.95157
-0.65191
-0.31512
-0.14479
-0.32274
-0.73635
-1.1145
-1.295
-1.321
-1.2368
-0.95038
-0.47186
-0.15179
-0.079874
0.0038109
0.027293
-0.032448
-0.050159
0.31939
0.87546
0.75123
-0.075479
-0.97485
-1.5013
-1.4064
-0.28122
1.35
2.2958
2.5143
2.1711
1.2604
0.2138
-0.55888
-0.85738
-0.61252
0.18981
0.96631
1.0327
0.37196
-0.48725
-0.81994
-0.42029
0.2445
0.74973
0.99822
0.96293
0.84684
0.74853
0.48741
-0.018719
-0.70568
-1.2844
-1.5867
-1.2777
-0.41316
0.12415
0.27441
0.61203
1.0811
2.1005
3.5784
4.4182
4.4049
3.6383
2.4755
1.5633
1.0467
0.82977
0.99686
1.2539
1.2991
1.1916
1.0093
0.94789
1.1117
1.4087
1.6015
1.639
1.8282
2.3304
2.7569
2.61
1.8687
0.95666
0.28519
-0.26644
-0.77695
-1.0782
-1.0753
-0.93129
-0.83622
-0.66253
-0.43653
-0.44846
-0.79898
-1.2495
-1.5412
-1.6268
-1.5348
-1.3172
-1.1336
-0.9368
-0.52055
-0.24876
-0.45032
-0.88351
-1.2326
-1.3582
-1.3521
-1.3156
-1.2792
-1.2088
-1.0572
-0.93004
-0.92889
-0.95078
-0.62646
0.058535
0.63572
0.84577
0.7669
0.70177
0.77347
0.82556
0.79408
0.79405
0.78023
0.62529
0.40885
0.32391
0.2137
-0.27055
-0.96209
-1.4664
-1.6202
-1.5608
-1.3971
-1.1071
-0.86969
-0.80845
-0.69814
-0.25328
0.21583
0.41459
0.59937
0.81267
1.0018
1.1319
1.1175
0.96777
0.50338
-0.35023
-1.1491
-1.3209
-0.83782
-0.19853
0.18157
0.11493
-0.26879
-0.63303
-0.72659
-0.4415
-0.075881
0.018637
-0.05196
0.098409
0.65019
1.2001
1.6198
1.7918
1.6623
1.5876
1.563
1.6117
1.64
1.6314
1.6696
1.6405
1.548
1.4024
1.2584
0.9027
0.16816
-0.73396
-1.4898
-1.8977
-1.9965
-1.8979
-1.7362
-1.4587
-0.99995
-0.53425
-0.19827
-0.031264
-0.015713
-0.15033
-0.41619
-0.79504
-1.1319
-1.3038
-1.3421
-1.2978
-1.2397
-1.1961
-1.1502
-1.1204
-1.1233
-1.1454
-1.1466
-1.0827
-0.9741
-0.81501
-0.72851
-0.847
-1.0424
-1.1748
-0.97245
-0.51708
-0.17914
-0.15541
-0.52416
-0.99748
-1.3157
-1.4246
-1.4045
-1.3378
-1.2462
-1.0807
-0.86001
-0.78451
-0.81927
-0.82506
-0.73669
-0.44741
-0.29045
-0.43792
-0.67124
-0.58718
-0.32782
-0.47496
-0.84163
-0.8574
-0.49807
-0.44975
-0.70849
-0.75517
-0.69826
-0.85235
-1.1014
-1.106
-0.40226
1.2026
2.6497
3.6503
4.2679
3.9836
3.5134
2.6034
0.7918
-1.0957
-1.7935
-0.76966
0.54194
0.74783
0.049945
-0.78457
-1.3325
-1.534
-1.4759
-1.2835
-1.0355
-0.82496
-0.6568
-0.36644
-0.031155
0.26661
0.63331
0.74384
0.54508
0.10778
-0.45918
-0.73521
-0.69945
-0.64096
-0.74439
-0.8343
-0.73659
-0.59196
-0.51799
-0.34431
-0.22612
-0.24907
-0.24763
0.0060171
0.87102
1.9462
2.7335
3.1504
3.1954
3.2395
3.5592
3.7564
3.4853
3.1293
2.8693
2.6345
2.3245
1.7562
0.99466
0.11499
-0.83299
-1.6009
-1.9423
-1.8314
-1.3777
-0.84365
-0.53269
-0.49911
-0.6341
-0.77422
-0.82763
-0.83669
-0.81253
-0.7592
-0.70882
-0.68411
-0.7061
-0.7799
-0.80715
-0.75378
-0.62521
-0.40521
-0.18439
-0.13478
-0.31427
-0.53542
-0.54657
-0.37991
-0.19954
-0.0093017
0.13552
0.35427
0.34766
0.19816
0.23077
0.10445
-0.24494
-0.60364
-0.70014
-0.53357
-0.36008
-0.25856
-0.29771
-0.29438
-0.0061991
0.66628
1.381
1.4211
0.72903
-0.039452
-0.16373
-0.039068
-0.14582
-0.3898
-0.42849
0.078749
0.97919
1.8307
2.1084
1.7167
1.0912
0.60718
0.36091
0.23911
0.10576
0.25829
0.63668
0.78332
0.62759
0.26076
0.014527
0.5656
1.2207
0.87494
0.33181
0.50931
0.54677
-0.19101
-1.066
-1.542
-1.4697
-1.1056
-0.75642
-0.55793
-0.52413
-0.61893
-0.78878
-0.96737
-1.0697
-1.0666
-0.99461
-0.84859
-0.61636
-0.42096
-0.39435
-0.45904
-0.52648
-0.57083
-0.553
-0.37988
0.08699
0.50415
0.49226
0.20843
-0.093416
-0.17423
0.053387
0.30239
0.30781
0.21554
0.14547
0.046
-0.13037
-0.37579
-0.56705
-0.61149
-0.6577
-0.82809
-1.0564
-1.2653
-1.3859
-1.4051
-1.3653
-1.2993
-1.1915
-0.99158
-0.74923
-0.56171
-0.48365
-0.65947
-0.74439
-0.46016
-0.38412
-0.59895
-0.86831
-0.92941
-0.60379
-0.44179
-0.5138
-0.41633
-0.31767
-0.50388
-0.45455
-0.12084
-0.19026
-0.64793
-1.0777
-1.2262
-1.0346
-0.45336
0.08999
0.21065
0.025173
-0.1666
0.020702
0.3711
0.30397
-0.2004
-0.67982
-0.69971
0.0056964
0.64904
0.62367
0.47977
0.67059
1.1409
1.4385
1.3725
1.0432
0.36444
-0.50452
-1.1005
-1.3106
-1.237
-1.0639
-0.93063
-0.89219
-0.9004
-0.8957
-0.81319
-0.34452
0.60317
1.4828
1.8587
1.7468
1.2566
0.68011
0.32688
0.14582
-0.24668
-0.94901
-1.5851
-1.8933
-1.8957
-1.7283
-1.4982
-1.2836
-1.1433
-1.0824
-1.0478
-1.0268
-1.0228
-0.99743
-0.96724
-0.96206
-0.9619
-0.96127
-0.94002
-0.87079
-0.79981
-0.75426
-0.75658
-0.74864
-0.53413
-0.17551
0.1294
0.33347
0.50258
0.59707
0.54388
0.42082
0.31133
0.29097
0.1751
-0.11515
-0.33692
-0.36959
-0.22279
0.02317
0.14873
0.12083
0.1049
0.12924
0.19375
0.23116
0.14003
-0.010479
-0.072455
-0.068078
-0.088314
-0.1181
-0.1442
-0.17535
-0.16878
-0.13429
-0.093958
0.036666
0.24584
0.43467
0.53766
0.54453
0.49915
0.42868
0.3227
0.39988
1.1095
2.4734
3.5869
3.8991
3.538
2.624
1.6106
1.1777
1.7988
2.6031
2.5424
1.5739
0.20902
-0.91686
-1.5657
-1.6084
-1.0771
-0.45117
-0.054076
0.11623
0.088323
0.060468
0.061065
-0.12633
-0.58281
-1.1296
-1.505
-1.6259
-1.5632
-1.4262
-1.2681
-1.0883
-0.87972
-0.62326
-0.42915
-0.41667
-0.55185
-0.78684
-1.0406
-1.2299
-1.329
-1.3322
-1.2611
-1.2148
-1.2278
-1.2596
-1.2792
-1.2847
-1.2704
-1.204
-1.0275
-0.86443
-0.84529
-0.7187
-0.33233
0.11646
0.43426
0.67016
0.92977
1.0425
0.84339
0.59861
0.32866
0.0064334
0.081348
0.36286
0.54737
0.61681
0.58737
0.65592
0.57739
0.52156
0.72656
0.80684
0.62788
0.24332
-0.18504
-0.34933
-0.25232
-0.17465
0.0615
0.66227
1.203
1.335
1.0375
0.716
0.68894
0.59416
0.34961
0.29769
0.49855
0.64778
0.60489
0.50688
0.34725
0.36177
0.53134
0.54356
0.63058
0.71967
0.60014
0.57413
0.44999
-0.020438
-0.32884
-0.22575
0.031448
0.19356
0.29695
0.65066
0.96064
0.88281
0.66942
0.48246
0.38934
0.24644
0.13919
0.038853
-0.30921
-0.70375
-0.815
-0.32076
0.59945
1.0805
0.71065
-0.067906
-0.65571
-0.54118
0.095812
0.59862
0.76288
0.75025
0.58674
0.3202
0.0087303
-0.29109
-0.21755
0.11922
0.37693
0.43445
0.26192
0.20192
0.44258
0.63809
0.80182
0.95934
0.92562
0.65114
0.18639
-0.07148
-0.12341
-0.088479
0.16177
0.69085
1.2532
1.4796
1.3869
1.1163
0.77074
0.59823
0.55411
0.53147
0.33899
-0.030295
-0.16501
0.037318
0.3493
0.63387
0.89828
0.83571
0.49149
0.39424
0.33442
0.12733
0.091667
0.18468
0.21978
0.28652
0.5355
0.79403
0.83727
0.74169
0.734
0.56453
0.27131
0.15544
-0.0088626
0.058442
0.46937
0.79005
0.72572
0.11337
-0.36154
-0.29457
-0.016085
0.31781
0.49365
0.24839
-0.052671
0.022413
0.26852
0.42714
0.40286
0.17006
-0.066903
0.028361
0.37883
0.67505
0.67971
0.53255
0.5435
0.43183
-0.10469
-0.79515
-1.3395
-1.3316
-0.85905
-0.3519
0.17605
0.52313
0.4906
0.47373
0.72714
0.97037
1.057
0.89515
0.55064
0.12515
-0.10331
-0.074342
0.044258
0.31457
0.45101
0.38422
0.24359
-0.023862
-0.03073
0.27529
0.36354
0.3117
0.4844
0.57375
0.44068
0.21557
0.10915
0.3894
0.69359
0.69801
0.56544
0.33902
0.077795
0.045883
0.26889
0.55963
0.6081
0.4298
0.36731
0.34878
0.047725
-0.46825
-0.9895
-1.433
-1.6952
NaN
NaN
NaN
NaN
NaN

## Sheet: Figure5_supplement1A_Run2
NaN
NaN
NaN
NaN
NaN
NaN
NaN
NaN
NaN
NaN
-0.054275
-0.018291
0.096317
0.24143
0.39629
0.50063
0.57687
0.53503
0.41677
0.52855
0.83141
0.9932
1.0795
1.0463
0.44271
-0.59518
-1.4454
-1.8293
-1.7219
-1.1689
-0.42102
0.074549
0.06356
-0.24481
-0.5792
-0.83599
-0.9448
-0.89702
-0.82002
-0.67063
-0.33774
0.15711
0.68323
0.95379
0.97923
0.82792
0.59052
0.49282
0.67813
0.85502
0.74848
0.67145
0.81774
1.0605
0.85126
0.030745
-0.72352
-0.94368
-0.73758
-0.57933
-0.67162
-0.78535
-0.82941
-0.78819
-0.68314
-0.63634
-0.47824
-0.019757
0.65256
0.84166
0.28904
-0.14314
-0.046797
0.11077
-0.21096
-0.6865
-0.73089
-0.55868
-0.54585
-0.52237
-0.41487
-0.4201
-0.581
-0.72675
-0.73149
-0.54559
-0.25324
0.036225
0.24528
0.36256
0.63108
1.1162
1.0888
0.2046
-0.84399
-1.5012
-1.6008
-1.1164
-0.44328
0.0044583
0.24643
0.3975
0.73385
1.4409
2.1701
2.9622
3.607
3.2252
2.1028
1.1653
0.59929
0.090665
-0.31453
-0.47226
-0.29991
0.1128
0.79956
1.6271
1.724
0.77335
-0.45245
-1.1501
-1.3169
-1.2967
-1.2466
-1.2108
-1.1644
-1.1152
-1.0834
-1.0828
-1.103
-1.1285
-1.1244
-1.076
-1.0414
-1.0375
-0.95005
-0.79615
-0.71819
-0.68581
-0.6837
-0.72324
-0.74658
-0.77499
-0.84714
-0.94745
-1.0243
-1.0821
-0.94901
-0.44263
0.18021
0.45042
0.18278
-0.35733
-0.82329
-0.92821
-0.66441
-0.25711
0.089663
0.35304
0.60058
0.76515
0.79272
0.74314
0.68676
0.56608
0.62769
1.2715
2.0608
2.4846
2.5777
2.2142
1.4226
0.66824
0.45987
0.76715
0.9256
0.50563
-0.17367
-0.63923
-0.82623
-0.83548
-0.79222
-0.78406
-0.82104
-0.92975
-1.0882
-1.2021
-1.2375
-1.2023
-1.1257
-0.89769
-0.42765
0.013885
0.2179
0.30452
0.40053
0.48009
0.54737
0.63511
0.80939
0.93557
0.91835
0.8088
0.38087
-0.31133
-0.86168
-1.1497
-1.2608
-1.2276
-1.128
-0.99405
-0.80251
-0.61224
-0.49841
-0.47352
-0.55605
-0.64369
-0.5017
-0.039206
0.59433
1.1967
1.4971
1.2921
0.8478
0.50998
0.3998
0.42429
0.28491
-0.19925
-0.76588
-0.74075
0.10396
1.1797
1.7053
1.4648
1.0017
0.67461
0.45273
0.23806
-0.031566
-0.19926
-0.17553
-0.21485
-0.50401
-0.94511
-1.3282
-1.521
-1.5204
-1.3754
-1.1546
-0.83383
-0.42816
-0.014254
0.27053
0.25392
-0.0093939
-0.21666
-0.21326
-0.073392
0.15146
0.41834
0.46102
0.14502
-0.1041
-0.067923
0.024316
-0.056074
-0.17735
-0.14339
-0.033271
0.0035157
-0.064908
-0.28123
-0.63002
-0.91131
-1.014
-0.90049
-0.62294
-0.28592
0.063553
0.1307
-0.061893
-0.24278
-0.47742
-0.78256
-1.0328
-1.1536
-1.1565
-1.0988
-1.0304
-0.9787
-0.94484
-0.9257
-0.91076
-0.90164
-0.89991
-0.90295
-0.90619
-0.91735
-0.92588
-0.93153
-0.70197
0.48265
1.8417
1.8316
0.88397
0.1168
-0.22013
-0.09943
0.30094
0.69627
1.3277
1.7857
1.6558
1.2462
1.0624
1.0897
0.92156
0.605
0.6369
0.92326
0.96951
0.93604
1.0984
1.4068
1.6129
1.917
2.3707
2.6461
2.7497
2.6806
2.2412
1.6529
1.0858
0.55598
0.28582
0.15685
0.098581
0.11828
0.46643
1.5157
2.4206
2.201
1.1378
-0.11886
-1.0253
-1.4493
-1.2945
-0.57521
0.11611
0.45819
0.59615
0.58556
0.57078
0.55907
0.26429
-0.18339
-0.53931
-0.85995
-1.0949
-1.1531
-1.0381
-0.79345
-0.40371
-0.1387
-0.097245
0.040836
0.14226
0.093142
-0.0016181
-0.29136
-0.68906
-0.96014
-1.0444
-1.0228
-0.93023
-0.67059
-0.46223
-0.52909
-0.6179
-0.55072
-0.55797
-0.6249
-0.43024
0.0090533
0.4792
0.56366
0.070261
-0.58706
-1.0538
-1.2431
-1.2245
-1.0846
-0.79289
-0.44986
-0.2191
-0.058398
0.1812
0.49122
0.57988
0.42102
0.22422
0.2285
0.42686
0.43827
0.10477
-0.23535
-0.39869
-0.51579
-0.54287
-0.55995
-0.61109
-0.70827
-0.36879
0.41314
0.61849
0.22525
-0.2646
-0.61246
-0.71133
-0.80871
-1.0331
-1.2707
-1.3916
-1.3427
-1.1137
-0.87874
-0.76419
-0.72482
-0.7599
-0.7788
-0.75717
-0.78987
-0.79052
-0.686
-0.48914
-0.35864
-0.46111
-0.69241
-0.90081
-1.0008
-0.94855
-0.78152
-0.68525
-0.71344
-0.76772
-0.71477
-0.36867
0.059889
0.22234
0.71737
1.2136
0.70292
-0.35641
-1.1513
-1.2152
-1.0127
-0.83734
0.099795
1.7446
2.7039
2.122
0.52443
-0.95002
-1.7044
-1.8039
-1.5236
-1.0009
-0.63779
-0.68352
-0.90677
-1.0487
-1.0349
-0.98866
-0.99451
-0.79327
-0.33967
-0.17134
-0.42075
-0.76818
-0.98577
-1.0474
-1.0409
-0.98058
-0.87264
-0.82485
-0.68618
-0.40647
-0.29364
-0.4042
-0.62862
-0.85428
-0.9438
-0.9249
-0.93855
-0.80829
-0.49298
-0.40902
-0.61275
-0.81459
-0.75947
-0.4404
0.24887
0.95108
1.0202
0.59112
0.76977
1.6348
1.9232
2.2598
3.3037
3.7783
2.5168
0.35844
-1.1811
-1.6323
-1.4426
-0.95823
-0.38289
-0.30852
-0.7383
-1.215
-1.4575
-1.4372
-1.1326
-0.40305
0.38265
0.78984
0.90649
0.79718
0.64429
0.5633
0.47356
0.44866
0.39474
0.18268
-0.010285
-0.14394
-0.22113
-0.20505
-0.18237
-0.061228
0.10557
0.20448
0.36181
0.61705
0.87025
0.88848
0.57694
0.2778
0.26051
0.39987
0.55108
0.49405
0.24666
0.58809
1.2521
1.218
0.54682
-0.16919
-0.56042
-0.64749
-0.50514
-0.25784
-0.091297
-0.080182
-0.0083897
0.24406
0.36439
0.28248
0.46249
0.78694
0.70033
0.41596
0.28065
0.17555
0.021227
-0.10501
-0.17495
-0.047769
0.43626
1.1486
1.6211
1.6292
1.6301
1.6969
1.4405
0.95031
0.49973
0.068654
-0.19843
-0.19663
-0.31049
-0.62033
-0.9182
-1.0564
-1.0459
-0.94092
-0.78904
-0.63572
-0.43395
-0.17987
0.042158
0.1838
0.27036
0.31831
0.29061
0.25766
0.32986
0.52206
0.75858
0.94424
1.0706
1.095
1.1948
1.3762
1.2666
0.9691
0.69579
0.47647
0.39894
0.44066
0.50978
0.47215
0.20266
-0.11604
-0.31588
-0.40162
-0.43679
-0.54719
-0.83427
-1.1993
-1.4333
-1.4964
-1.4296
-1.3071
-1.191
-1.1037
-1.0177
-0.91017
-0.80816
-0.73985
-0.72541
-0.78149
-0.86786
-0.93189
-0.95019
-0.93583
-0.87779
-0.71867
-0.35987
0.075483
0.16302
-0.20345
-0.69942
-1.0253
-1.1285
-1.1
-1.0315
-0.97046
-0.9164
-0.85893
-0.8068
-0.75714
-0.70447
-0.53884
-0.16508
0.13416
0.10478
-0.089907
-0.17638
-0.095542
0.041111
0.099897
0.045763
-0.087958
-0.26051
-0.28518
-0.2212
-0.20742
-0.2797
-0.4665
-0.64366
-0.65242
-0.44171
-0.26518
-0.3194
-0.50376
-0.65662
-0.72295
-0.75308
-0.79271
-0.83023
-0.85287
-0.85006
-0.81305
-0.72654
-0.59045
-0.30195
0.11595
0.28232
0.086584
-0.30673
-0.70543
-0.97986
-1.1157
-1.1402
-1.0783
-0.95134
-0.80358
-0.64205
-0.57076
-0.52528
-0.38155
-0.1694
0.12024
0.28958
0.5305
1.3055
2.3214
3.1066
3.4541
3.3116
2.9754
2.677
2.4571
1.9085
0.70373
-0.58916
-1.3192
-1.4238
-1.2595
-1.0751
-0.90672
-0.67009
-0.34117
-0.049858
0.029557
-0.17935
-0.47144
-0.63849
-0.29879
0.713
1.3524
0.92171
0.16277
-0.21102
-0.28322
-0.31934
-0.39914
-0.48756
-0.47372
-0.32916
-0.1364
0.087953
0.3238
0.34924
0.067549
-0.35434
-0.66696
-0.77013
-0.68295
-0.54635
-0.49298
-0.49824
-0.52466
-0.57178
-0.51003
-0.28953
-0.03772
0.22646
0.27655
0.10976
0.010645
0.081945
0.25897
0.47219
0.87693
1.2935
1.3937
1.1831
0.84377
0.56882
0.42769
0.489
0.75207
1.0976
1.4334
1.5156
1.2656
0.93885
0.72442
0.69481
0.72882
0.70979
0.64091
0.65762
0.94555
1.3602
1.654
1.6618
1.4258
1.1338
0.90652
0.81029
0.86616
1.0451
1.3897
1.8541
2.134
2.1197
1.9866
1.8462
1.7708
1.8215
1.914
1.9938
2.0656
2.0716
1.9858
1.9508
2.0514
1.9813
1.6377
1.3257
1.2694
1.6063
2.1114
2.3184
2.1454
2.036
2.3654
2.7986
2.9536
3.0014
3.0225
2.9881
3.0042
2.6968
1.535
-0.13584
-1.4549
-2.0301
-1.9933
-1.6539
-1.2538
-0.90629
-0.688
-0.61126
-0.59905
-0.56017
-0.51995
-0.51908
-0.61237
-0.6054
-0.27367
-0.030491
-0.067297
-0.24401
-0.54694
-0.87288
-1.0545
-0.92105
-0.64766
-0.56109
-0.71401
-0.94259
-0.99445
-0.79759
-0.61397
-0.59301
-0.69025
-0.79789
-0.81083
-0.80112
-0.81149
-0.81046
-0.70194
-0.51006
-0.34275
0.018214
0.43905
0.44828
0.31478
0.17758
-0.20907
-0.58548
-0.78541
-0.85852
-0.66576
-0.16733
0.29531
0.42499
0.21791
-0.13577
-0.43574
-0.51137
-0.45307
-0.40868
-0.28677
-0.23809
-0.4063
-0.60647
-0.65359
-0.5567
-0.46084
-0.4716
-0.62602
-0.8252
-0.89958
-0.82752
-0.82357
NaN
NaN
NaN
NaN
NaN
NaN
NaN
NaN
NaN

## Sheet: Figure5_supplement1B_Run1_mean
0.12319
0.075262
0.098579
0.041483
0.023406
-0.02476
-0.028366
-0.055243
-0.077071
0.02107
0.006872
-0.002609
-0.014688
-0.0076005
-0.039229
-0.014852
-0.020056
-0.010073
0.026389
0.067452
0.047146
0.020531
0.08029
0.075938
0.15615
0.087266
0.14111
0.21501
0.23378
0.21977
0.19221
0.16126
0.07625
-0.024959
-0.0992
-0.09104
-0.10503
-0.088653
-0.11442
-0.15184
-0.22372
-0.21523
-0.18377
-0.22345
-0.18834
-0.21321
-0.18794
-0.073098
-0.0087376
-0.05081
-0.20652
-0.20805
-0.22697
-0.15999
-0.19743
-0.15123
-0.056104
-0.0066105
0.030071
0.1162
0.11679
0.15225
0.076134
0.033072
0.12721
0.12081
0.14102
0.14902
0.20238
0.13168
0.036751
-0.044166
-0.1108
-0.12319
-0.041994
-0.087548
0.017323
-0.04677
-0.054717
-0.10485
-0.038914
-0.16273
-0.15473
-0.22751
-0.26006
-0.18516
-0.082952
0.039603
0.036493
-0.079869
-0.13487
-0.18168
-0.12003
-0.11773
-0.062777
-0.062225
0.081374
0.046329
0.022647
-0.045161
-0.085776
-0.074135
-0.095173
-0.14831
-0.072669
-0.0067649
0.12112
0.12811
0.10387
-0.046921
-0.14831
-0.061993
0.0090023
0.088322
0.20676
0.30395
0.2818
0.24476
0.23158
0.28714
0.37104
0.34408
0.34003
0.33406
0.30366
0.27343
0.19422
0.1787
0.14691
0.12564
0.064573
-0.025337
-0.053643
-0.0080267
-0.015571
-0.11779
-0.22161
-0.18196
-0.15644
-0.14297
-0.18816
-0.25023
-0.24269
-0.20258
-0.20706
-0.16525
-0.057328
0.020031
0.017359
-0.12248
-0.17545
-0.11188
0.031726
-0.036807
0.02047
0.054905
0.082294
0.15801
0.18082
0.057681
-0.088887
-0.084927
-0.0047703
0.065682
0.059238
0.078289
0.023527
-0.0082081
0.037137
0.0353
0.061759
0.067357
-0.044419
0.0053998
0.00018781
0.038797
0.009285
-0.063611
-0.030505
-0.0046886
0.029175
0.088601
0.030083
-0.0085861
-0.019924
0.0049687
-0.038288
-0.1072
-0.048278
0.012012
0.13333
0.0090403
-0.10365
-0.28604
-0.28922
-0.24161
-0.26925
-0.20155
-0.17001
0.0026171
0.16249
0.10289
-0.070291
-0.24267
-0.25911
-0.20695
-0.1633
-0.24516
-0.28271
-0.36419
-0.42857
-0.37196
-0.30761
-0.29386
-0.24611
-0.2486
-0.31152
-0.21617
-0.14863
-0.11407
-0.055438
-0.17119
-0.25892
-0.2345
-0.18338
-0.16294
-0.092936
-0.031577
0.033665
0.02359
0.0087176
0.013241
-0.017088
-0.019602
-0.023658
-0.069089
-0.058606
-0.077446
-0.043807
-0.096174
-0.0049365
0.1078
0.08695
-0.054768
-0.19245
-0.23197
-0.19504
-0.17334
-0.13743
0.0077362
0.058899
0.083245
0.054203
0.014886
-0.0062052
-0.090608
-0.11778
-0.1378
-0.037946
0.045942
0.1982
0.38561
0.44796
0.46127
0.43991
0.44515
0.41363
0.4048
0.38524
0.28263
0.22504
0.20903
0.25696
0.21665
0.21161
0.15882
0.16403
0.17234
0.1785
0.19066
0.19248
0.20179
0.20481
0.11208
0.057566
0.095102
0.16667
0.12682
0.0074573
-0.17974
-0.28744
-0.28109
-0.21036
-0.16526
-0.15978
-0.14075
-0.069595
-0.058948
-0.017007
-0.036955
-0.006969
0.11766
0.1015
0.078485
-0.070238
-0.14293
-0.14908
-0.099754
-0.017594
0.025686
-0.038278
0.017187
-0.049122
-0.098373
-0.043706
-0.096949
-0.088492
-0.0095032
0.036521
0.10844
0.092888
-0.005732
-0.063392
-0.043342
-0.11305
-0.055787
-0.11939
-0.086115
-0.087289
-0.00025537
0.045618
0.068962
0.0058957
0.05863
0.042963
-0.059595
-0.081176
-0.013572
0.061798
0.0413
0.049384
0.048155
0.073477
0.019343
-0.042997
0.064324
0.11731
0.14465
0.08447
0.10832
0.099532
0.18507
0.23441
0.28489
0.28024
0.31708
0.35631
0.35628
0.36692
0.34416
0.28943
0.25774
0.15436
0.16485
0.19232
0.17036
0.18651
0.10967
0.078801
0.10977
0.13964
0.091264
0.04632
0.036719
0.041752
0.05147
-0.024584
-0.13693
-0.21542
-0.28498
-0.25672
-0.16523
-0.072872
0.002391
0.01907
-0.1293
-0.19658
-0.1443
-0.053667
0.0020703
0.032091
0.052644
0.031559
0.0058514
0.065184
0.057331
0.023975
-0.072197
-0.0026056
0.021516
-0.072661
-0.18264
-0.29559
-0.30182
-0.16226
-0.059273
0.012007
-0.076915
-0.12847
-0.082759
-0.015261
0.026388
0.090772
0.11051
0.14652
0.15558
0.13266
0.047327
-0.18764
-0.30448
-0.3148
-0.22956
-0.14043
-0.13471
-0.13383
-0.17309
-0.25341
-0.24983
-0.30918
-0.23875
-0.1391
-0.12798
-0.19825
-0.12807
-0.036361
-0.027148
-0.047306
0.037271
0.074778
0.052951
0.0061752
0.026586
0.063502
0.054709
0.11534
0.067288
0.022284
0.078918
0.10049
0.14274
0.19009
0.16651
0.071895
0.03742
-0.039179
-0.0042081
-0.08328
-0.070583
0.058764
0.099578
0.086414
-0.047049
-0.054192
-0.044896
-0.029421
0.055874
0.068424
0.13865
0.064066
-0.10488
-0.14848
-0.2068
-0.089362
-0.028408
-0.080674
-0.14722
-0.12922
-0.095855
-0.027748
-0.020363
0.068832
0.054885
0.0061849
-0.0050315
-0.056508
-0.077009
-0.060732
-0.0023058
0.015806
0.058955
0.068243
0.0079531
0.08044
0.095415
-0.058772
-0.11061
-0.086874
0.0093459
0.035535
0.036288
0.061167
0.061428
0.1318
0.18734
0.112
0.04998
-0.010913
-0.044934
-0.065
-0.081131
-0.14627
-0.14653
-0.15085
-0.11573
-0.10687
-0.12408
-0.10954
-0.087455
-0.048251
-0.032249
-0.011073
-0.04609
-0.074889
-0.1102
-0.081628
-0.13724
-0.054532
-0.0010258
0.11588
0.12425
0.10467
0.036244
-0.05376
-0.1355
-0.19795
-0.094106
0.04756
0.11853
0.093026
0.055295
0.09812
0.12727
0.14434
0.16312
0.17474
0.16822
0.19895
0.24798
0.24333
0.14087
-0.00051725
-0.046106
-0.074237
-0.062205
-0.084425
-0.029086
0.077247
0.1357
0.15775
0.088533
0.096686
0.04991
0.054542
0.028541
0.049824
0.11054
0.15872
0.1181
0.022948
-0.045652
-0.12107
-0.068308
-0.056803
-0.01156
-0.030339
-0.06715
-0.16754
-0.19269
-0.19989
-0.21791
-0.18043
-0.12543
-0.13598
-0.083415
-0.14171
-0.098636
0.013421
0.14874
0.24312
0.21509
0.16198
0.075722
0.089395
0.10216
0.14797
0.14514
0.21543
0.17867
0.10806
0.13455
0.059063
-0.019564
-0.058398
-0.039882
-0.069593
-0.068854
-0.01764
-0.077351
-0.047014
-0.044713
-0.12226
-0.093907
-0.074589
-0.096787
-0.17267
-0.28355
-0.34435
-0.27243
-0.10095
-0.11001
-0.083687
-0.12389
-0.21947
-0.12638
-0.13521
-0.085027
-0.08449
-0.094811
-0.036242
-0.043077
0.0059037
0.017394
0.029957
-0.033566
-0.038679
-0.00541
0.071798
-0.074368
-0.098443
-0.094661
-0.0083256
0.059812
-0.026099
-0.038617
-0.20683
-0.25439
-0.28179
-0.20177
-0.21109
-0.25281
-0.27611
-0.22213
-0.20414
-0.21618
-0.19352
-0.19857
-0.20527
-0.26839
-0.18362
-0.2195
-0.078739
0.014662
0.038909
0.056789
0.077708
0.1209
0.17631
0.20595
0.35176
0.40534
0.4337
0.40067
0.38753
0.3355
0.32693
0.32978
0.31768
0.23133
0.21411
0.28887
0.35059
0.33709
0.25153
0.2161
0.1546
0.20219
0.19688
0.24679
0.26511
0.26148
0.28048
0.17542
0.15695
0.10586
0.22737
0.24818
0.21481
0.16642
0.085975
-0.044936
-0.11366
-0.19231
-0.27104
-0.29054
-0.29319
-0.24657
-0.15012
-0.23417
-0.29244
-0.23017
-0.066287
-0.0038429
-0.051305
-0.18804
-0.3246
-0.27368
-0.19102
-0.1935
-0.14591
-0.082106
-0.086162
-0.063421
-0.15708
-0.21443
-0.26234
-0.17758
-0.14988
-0.16331
-0.26348
-0.33791
-0.33491
-0.35615
-0.34719
-0.2951
-0.23858
-0.19386
-0.050822
0.0022944
-0.0038656
-0.080988
-0.015857
0.0113
-0.029104
-0.12627
-0.13789
-0.12337
-0.061496
0.050208
0.11876
0.038565
-0.061425
-0.12793
-0.06211
0.089781
0.19127
0.29088
0.29382
0.33114
0.41445
0.42971
0.44602
0.4064
0.42546
0.45608
0.42918
0.4382
0.4154
0.42972
0.3333
0.31722
0.26769
0.20055
0.20947
0.21772
0.24189
0.32235
0.34495
0.35763
0.33823
0.39729
0.33057
0.29167
0.21273
0.24674
0.18941
0.12817
-0.032279
-0.096147
-0.098794
-0.078032
-0.07701
-0.01891
-0.0089494
-0.014695
-0.040224
0.0070925
-0.013601
-0.090781
-0.17478
-0.22475
-0.23016
-0.31403
-0.26729
-0.21982
-0.076806
-0.096621
-0.10642
-0.12683
-0.21608
-0.2902
-0.29596
-0.27209
-0.23471
-0.19821
-0.23263
-0.32804
-0.27827
-0.22128
-0.15965
-0.11629
-0.21579
-0.23656
-0.23748
-0.055071
0.031568
0.026996
-0.013039
-0.0036159
0.015569
-0.0099523
0.038409
0.06317
0.055473
-0.016102
-0.11345
-0.14784
-0.20802
-0.1292
-0.11606
-0.051008
-0.072277
-0.14674
-0.1943
-0.27207
-0.24547
-0.18956
-0.14399
-0.020689
-0.049604
-0.094816
-0.1233
-0.036153
0.035366
0.12063
0.096833
0.14585
0.19556
0.16225
0.12642
0.044613
-0.061379
-0.065539
-0.19556
-0.26566
-0.27118
-0.25545
-0.10624
0.044692
0.13166
-0.037116
-0.06415
0.11706
0.21344
0.27356
0.11605
-0.018991
-0.10822
-0.11504
-0.063371
0.0047951
0.095321
0.079339
0.040299
0.014018
0.054111
0.07217
-0.02423
-0.020671
-0.018292
0.046672
0.070522
-0.027478
-0.090381
-0.085727
0.037035
0.20106
0.18866
0.042424
-0.10526
-0.086682
-0.044678
0.069527
0.18871
0.25956
0.16997
0.049981
-0.10235
-0.0076715
0.043106
-0.036242
-0.029063
-0.094201
-0.046264
-0.04675
0.092194
0.0511
-0.051723
-0.14687
-0.12731
-0.041005
0.014264
0.030611
-0.0075478
0.014332
0.043425
-0.073249
-0.092749
-0.14754
-0.16791
-0.029016
-0.011328
-0.13773
-0.18613
-0.21339
-0.20733
-0.207
-0.18136
-0.065592
0.08695
0.14269
0.15458
0.046252
0.10675
-0.029977
-0.026455
-0.0077808
0.060589
-0.019934
-0.08818
-0.12739
-0.054241
-0.058821
-0.039708
-0.063434
-0.029836
0.043417
0.057806
-0.043238
-0.038425
0.015923
-0.0051811
-0.14012
-0.16642
-0.20981
-0.18162
-0.19341
-0.15866
-0.11011
-0.013346
0.054368
0.060333
0.040093
0.038254
-0.12977
-0.20807
-0.15974
0.039157
0.19244
0.15763
0.050507
-0.0088315
0.038956
0.14843
0.13927
0.15562
0.13062
0.055934
-0.009477
-0.024349
-0.053899
-0.026407
-0.07203
-0.066542
-0.064503
0.078842
0.27554
0.43335
0.61506

## Sheet: Figure5_supplement1B_Run2_mean
0.05941
-0.00089874
0.057091
0.0081519
0.0058396
-0.02121
0.010826
0.025342
0.086554
0.072457
0.03068
0.010318
-0.036134
0.017962
0.0035215
-0.063558
-0.081939
-0.029405
-0.07944
-0.069191
-0.065799
-0.023607
-0.0551
-0.017678
0.033271
0.071199
0.11655
0.1152
0.13963
0.22288
0.28285
0.23079
0.17923
0.099547
0.0089216
0.0074098
-0.017307
-0.040372
-0.085861
-0.063767
-0.01719
0.05477
0.032811
-0.093218
-0.087137
-0.0012405
0.073227
0.11221
0.035975
-0.035674
-0.042709
0.073483
0.109
0.035189
-0.046958
-0.10714
-0.0094017
0.029149
-0.046659
-0.11541
-0.23185
-0.21692
-0.18036
-0.14228
-0.068794
-0.035305
0.047888
0.060631
-0.03508
-0.1642
-0.24733
-0.33773
-0.22063
-0.14192
-0.053742
-0.0062995
-0.0091471
0.016937
0.059225
0.052644
-0.065406
-0.22469
-0.26239
-0.2846
-0.27941
-0.20752
-0.06762
0.03051
0.050407
-0.016109
-0.08365
-0.11175
-0.03184
0.023696
-0.027018
-0.07472
-0.12496
-0.14329
-0.16193
-0.12629
-0.042241
0.036993
0.14555
0.23047
0.17124
0.19158
0.11926
0.11094
0.036172
-0.00029281
-0.027547
-0.060455
-0.035499
0.0088601
0.080826
0.081726
0.098047
0.082393
0.10916
0.1851
0.24259
0.25576
0.24982
0.19063
0.14338
0.033442
-0.13279
-0.10855
-0.10234
-0.038621
-0.038624
-0.029624
-0.03975
0.020555
-0.11175
-0.050189
-0.057409
-0.1065
-0.15343
-0.13082
-0.08596
-0.12116
-0.15898
-0.26373
-0.21342
-0.17989
-0.07332
-0.01461
-0.087123
-0.13517
-0.2228
-0.28422
-0.20092
-0.23742
-0.16693
-0.16623
-0.064149
0.045361
0.061778
0.11137
0.057923
-0.0026462
-0.11979
-0.27534
-0.38034
-0.32965
-0.15884
0.088048
0.16968
0.24831
0.31796
0.28967
0.26759
0.18724
0.16981
0.13445
0.079091
0.040241
0.0091301
0.11787
0.1377
0.046077
-0.051543
-0.13159
-0.1357
-0.18022
-0.13024
0.031965
0.15688
0.19236
0.10468
0.15502
0.11613
0.10253
0.078815
0.014274
-0.068718
-0.01303
0.020864
0.10034
-0.049287
-0.0059073
0.025405
0.070622
0.078003
0.1064
0.11458
0.13216
0.046712
0.049931
0.02305
-0.10239
-0.030138
-0.040189
-0.088174
-0.024072
-0.024995
0.025779
-0.025291
-0.14273
-0.16325
-0.1349
-0.057863
-0.01008
-0.051123
-0.13326
-0.076275
0.036425
0.13982
0.15119
0.12662
0.094561
0.14827
0.27774
0.24389
0.21362
0.19249
0.15287
0.083893
0.11066
0.13146
0.092855
0.17561
0.17269
0.13335
0.13445
0.13054
0.15316
0.19003
0.29927
0.34394
0.34406
0.33263
0.2908
0.15794
0.02493
0.048889
0.057954
0.022263
-0.03545
-0.20603
-0.24135
-0.21534
-0.19378
-0.15764
-0.1036
-0.0085739
-0.022641
-0.034688
0.044376
0.17009
0.22886
0.19534
0.16397
0.11557
0.050111
-0.046409
-0.0501
-0.085002
-0.16164
-0.24388
-0.33365
-0.31629
-0.28435
-0.22547
-0.16867
-0.20943
-0.20869
-0.043825
0.028048
0.026674
0.050833
0.089793
0.21088
0.28386
0.25782
0.22396
0.17199
0.14882
0.17988
0.13655
0.14641
0.076915
0.062301
-0.057603
-0.024799
-0.096415
-0.1463
-0.1464
-0.17751
-0.23356
-0.24222
-0.27493
-0.32817
-0.31241
-0.26741
-0.21739
-0.2174
-0.33121
-0.30254
-0.29402
-0.25285
-0.19557
-0.19485
-0.16466
-0.074553
-0.088091
0.018615
0.046869
0.055052
-0.012229
-0.12918
-0.15742
-0.14683
-0.10317
0.030244
-0.049124
-0.073502
-0.11505
-0.077017
-0.086448
-0.11536
-0.10215
-0.068539
0.0087388
0.020025
0.060529
0.014488
0.07425
0.16816
0.18793
0.096969
0.15965
0.19463
0.27481
0.28928
0.31556
0.24009
0.12687
-0.03137
-0.10527
-0.086178
0.035013
0.034895
0.059981
0.059962
-0.061351
-0.1323
-0.14195
-0.14632
-0.14517
-0.12661
-0.092438
-0.028542
0.045348
0.073226
0.037669
-0.021443
-0.028968
-0.014154
-0.016824
0.029577
0.086233
0.10031
0.126
0.07922
0.069745
0.016477
-0.085386
-0.1123
-0.10212
-0.031915
0.024566
0.088408
0.062501
0.015871
0.041492
0.072452
0.12597
0.076299
0.075284
0.023079
-0.12195
-0.17763
-0.16062
-0.14259
-0.13269
-0.053152
-0.13671
-0.2448
-0.27924
-0.27082
-0.15484
-0.13286
-0.1977
-0.2698
-0.28824
-0.21549
-0.20786
-0.26019
-0.25716
-0.26797
-0.20014
0.054589
0.30403
0.40459
0.4619
0.45368
0.50522
0.50876
0.47361
0.42141
0.32029
0.28525
0.23492
0.21329
0.17232
0.13899
0.094753
0.012507
0.072585
0.16622
0.18694
0.20375
0.14346
0.070251
0.055101
0.087578
0.104
0.068709
-0.099831
-0.18088
-0.28795
-0.22095
-0.22458
-0.19917
-0.060554
0.037733
0.058016
-0.012486
-0.092987
-0.064297
-0.021626
-0.0074744
-0.027623
-0.096954
-0.1635
-0.088335
-0.022932
0.04363
0.08657
0.032247
-0.018308
-0.042868
-0.053384
-0.050499
-0.015736
0.023608
0.0151
0.06354
0.033473
0.02506
-0.03238
-0.088823
-0.077165
-0.06624
-0.13
-0.15329
-0.1402
-0.12355
-0.10882
-0.057531
-0.058445
-0.015602
-0.028122
-0.010872
-0.0088791
-0.027371
0.0070834
0.076567
0.039791
0.032836
-0.032756
-0.036222
-0.079933
0.021187
0.027854
-0.029141
-0.038375
-0.12087
-0.043339
0.018831
0.018856
-0.04342
-0.073067
-0.12107
-0.14103
-0.14185
-0.15588
-0.12137
-0.15016
0.028294
0.15242
0.27762
0.36804
0.37081
0.37176
0.33461
0.3458
0.33238
0.30514
0.29497
0.153
0.12113
0.093594
0.13267
0.17688
0.096997
0.099119
0.083604
0.090595
0.12026
0.135
0.13025
0.089987
0.094059
0.023265
-0.063
-0.13377
-0.13698
-0.059092
-0.0044748
-0.028779
0.0050982
-0.0013157
-0.12475
-0.17348
-0.19775
-0.064708
0.044595
-0.042728
-0.23073
-0.35867
-0.30223
-0.22749
-0.011557
0.063048
0.026072
0.044381
-0.03808
-0.058833
-0.14226
-0.10504
-0.10687
-0.16087
-0.071202
0.02089
0.10643
0.035551
0.0052132
0.054267
0.039858
-0.076982
-0.14114
-0.14041
-0.32888
-0.37649
-0.27784
-0.17997
-0.13398
-0.06609
0.05103
0.034315
0.026675
0.017822
0.072674
0.0086567
0.072103
0.039774
-0.077444
-0.10896
-0.12674
-0.14034
-0.075613
-0.082268
-0.043118
-0.0065974
0.056024
0.087292
0.067776
0.012305
0.023921
-0.038037
-0.095563
-0.16504
-0.21389
-0.26189
-0.29632
-0.28398
-0.18356
-0.081771
-0.10381
-0.1915
-0.20628
-0.22175
-0.13872
-0.12179
-0.13086
-0.13964
-0.054946
0.038692
0.14635
0.31038
0.32987
0.41346
0.46611
0.42028
0.41904
0.42109
0.43056
0.38274
0.3803
0.41834
0.42954
0.43902
0.44323
0.38661
0.29896
0.28205
0.21532
0.17326
0.17386
0.21656
0.22146
0.11971
0.12926
0.17169
0.15581
0.12126
0.060191
0.07298
0.16599
0.29754
0.30504
0.2114
0.12021
0.070846
0.057558
-0.071629
-0.12967
-0.21808
-0.29618
-0.2926
-0.44476
-0.47088
-0.38196
-0.30317
-0.29712
-0.24975
-0.23289
-0.17203
-0.24613
-0.27841
-0.29275
-0.26621
-0.18003
-0.19395
-0.12228
-0.086298
-0.11793
-0.17763
-0.19063
-0.24662
-0.24529
-0.1452
0.05548
0.24588
0.22539
0.22498
0.12375
-0.044747
-0.14731
-0.040158
0.030025
0.1174
0.056355
-0.028735
-0.1739
-0.22144
-0.19129
-0.18396
-0.21809
-0.14189
-0.11262
-0.052919
0.060462
0.11269
0.056984
0.0033143
-0.13882
-0.23092
-0.31116
-0.20867
-0.020924
0.13473
0.30139
0.37617
0.34118
0.2368
0.13643
0.024536
0.04052
0.047531
-0.083496
-0.084996
0.0095945
0.050852
0.044523
0.060207
0.1188
0.15847
-0.0039097
-0.034638
-0.024255
0.082937
0.10397
0.21618
0.19899
0.17351
0.10017
-0.0050804
0.040606
0.1289
0.092323
0.030621
0.042645
0.064185
0.083872
0.039558
-0.12313
-0.25179
-0.36159
-0.41653
-0.40984
-0.37436
-0.39556
-0.44676
-0.41651
-0.38455
-0.26094
-0.26427
-0.31368
-0.33074
-0.27065
-0.21402
-0.24984
-0.18274
-0.11484
-0.034644
-0.10648
-0.20492
-0.29991
-0.36333
-0.38151
-0.24416
-0.060415
0.015317
0.04511
0.12289
0.16979
0.10699
-0.0058031
-0.00069565
0.059518
0.15183
0.12386
0.2033
0.2091
0.22016
0.12576
-0.064799
-0.29237
-0.41672
-0.41451
-0.30705
-0.12693
-0.06382
-0.08981
-0.17107
-0.19439
-0.14066
0.0068625
0.21208
0.21392
0.09307
0.018356
0.030632
0.099975
0.13793
0.012147
0.03643
0.076175
0.13865
0.13957
0.052323
-0.0072552
-0.12515
-0.090131
0.01156
0.088426
0.17272
0.2539
0.18933
0.046068
0.058535
0.026278
0.17538
0.30747
0.33689
0.29467
0.31531
0.35462
0.36386
0.23403
0.069875
-0.018753
-0.080573
-0.076748
-0.13786
-0.087037
-0.033856
-0.031495
-0.16984
-0.24395
-0.34207
-0.36017
-0.28238
-0.32057
-0.32906
-0.35885
-0.33687
-0.3325
-0.21408
-0.10471
-0.14655
-0.053503
-0.041443
-0.048854
-0.011103
0.013087
-0.11451
-0.049907
-0.011377
0.12276
0.1971
0.19691
0.20592
0.24762
0.21807
0.23326
0.12635
0.030624
-0.051335
-0.060935
-0.22629
-0.2454
-0.26042
-0.21945
-0.18149
-0.1218
-0.065611
0.011413
0.040163
0.088236
0.031848
0.074091
0.022302
0.02278
0.017366
0.057926
0.031602
-0.099551
-0.14038
-0.11444
-0.0959
-0.04301
-0.019141
-0.081181
-0.056935
-0.023218
0.011912
0.091946
0.097211
0.12263
0.15695
0.23759
0.33793
0.39342
0.23533
0.233
0.18199
0.22865

## Sheet: Figure5_supplement1C_Run1_mean
0.11023
-0.0034009
-0.096057
-0.18606
-0.18703
-0.2071
-0.19798
-0.19715
-0.14844
-0.11408
-0.14456
-0.16897
-0.17226
-0.15169
-0.14675
-0.15808
-0.036898
-0.073093
-0.065675
-0.036806
-0.025676
-0.02261
-0.017353
-0.0020601
0.060806
0.1994
0.32
0.37816
0.35453
0.27917
0.25578
0.18877
0.044818
-0.012187
-0.038752
-0.074906
-0.069151
-0.01042
0.02298
0.048216
-0.028802
-0.081225
-0.10274
-0.10205
-0.1766
-0.16093
-0.11559
-0.071586
-0.081531
-0.096788
-0.099725
-0.1437
-0.10022
-0.083198
-0.047956
-0.05085
-0.037701
-0.062099
-0.086898
-0.064299
-0.021418
-0.075074
-0.11235
-0.029991
-0.015013
-0.026834
-0.026849
-0.076058
-0.090115
-0.070935
-0.080301
-0.1436
-0.10962
0.062177
0.15313
0.13844
0.039968
-0.041967
-0.091366
-0.08318
-0.12073
-0.12542
-0.072249
-0.00092336
0.027728
-0.12185
-0.18439
-0.16719
-0.096752
-0.054351
-0.14375
-0.10072
-0.024101
0.074512
-0.041967
-0.060524
-0.012879
-0.032446
-0.086723
-0.11682
-0.085017
-0.052459
-0.072894
-0.089687
-0.092605
-0.10655
-0.034657
-0.056712
-0.13449
-0.12737
-0.1482
0.013921
0.10769
0.13872
0.1918
0.21062
0.17973
0.15809
0.2041
0.2532
0.2583
0.27143
0.25982
0.23099
0.22942
0.23602
0.2397
0.27392
0.17627
0.11679
-0.036995
-0.13067
-0.16039
-0.12739
-0.13594
-0.086821
-0.016406
0.16126
0.24402
0.19648
0.1346
0.038196
0.04258
-0.01073
-0.095705
-0.099491
-0.038702
-0.046066
0.053577
0.17967
0.20858
0.23304
0.16804
0.14187
0.18048
0.11803
-0.021331
-0.095008
-0.17393
-0.2295
-0.22624
-0.22973
-0.20134
-0.16191
-0.074003
-0.010634
-0.060458
-0.14485
-0.15054
-0.12914
-0.047923
0.1189
0.18825
0.15604
0.143
0.14402
0.023077
-0.084406
-0.035719
0.015696
-0.06324
-0.1032
-0.10037
-0.13151
-0.13883
-0.10455
-0.11897
0.0086821
0.14972
0.18546
0.15773
-0.020601
-0.11851
-0.18223
-0.22346
-0.24661
-0.2194
-0.12381
0.044243
0.09514
-0.0017506
-0.10389
-0.17304
-0.14148
-0.030774
0.093649
0.05351
-0.035273
-0.12401
-0.21398
-0.21694
-0.22875
-0.2186
-0.27491
-0.20494
-0.15999
0.018721
0.23203
0.30684
0.20198
0.13821
0.064684
0.025871
-0.057731
-0.12296
-0.15308
-0.12874
-0.027633
0.053175
0.072954
0.10528
0.10556
0.052626
0.1339
0.080674
0.10821
0.11475
0.11663
0.17812
0.069697
-0.0023858
0.0046378
0.058739
0.097356
0.030414
-0.032246
-0.048522
0.051361
0.06982
0.11098
0.093367
0.082271
0.12455
0.022165
-0.013758
-0.108
0.048366
-0.011023
-0.1209
-0.082896
-0.043507
0.18222
0.28148
0.2883
0.28625
0.25567
0.23917
0.19784
0.11579
0.14649
0.18924
0.23603
0.23629
0.1721
0.1944
0.18359
0.10087
0.13413
0.031174
0.039392
0.06578
0.11904
-0.0010185
-0.11725
-0.18799
-0.18183
-0.14552
-0.18911
-0.21815
-0.26226
-0.23534
-0.22928
-0.22791
-0.19122
-0.15311
-0.20358
-0.18957
-0.0062187
0.1066
0.15878
0.071135
0.087193
0.11109
0.02956
-0.015125
0.0093172
0.00014407
-0.049212
-0.11873
-0.087712
-0.16438
-0.16403
-0.15943
-0.14817
-0.13291
-0.15525
-0.096241
-0.0066052
0.062388
0.058967
-0.065909
-0.11969
-0.15434
-0.11291
-0.027941
-0.0026332
0.05915
0.06826
-0.0082082
-0.064569
-0.089543
-0.16007
-0.16076
-0.207
-0.17989
-0.16093
-0.11239
-0.12369
-0.14296
-0.15005
-0.18601
-0.19064
-0.12955
-0.11044
-0.10602
-0.086584
-0.020753
0.068286
0.032388
0.091722
0.1197
0.20102
0.29388
0.32824
0.27168
0.24729
0.181
0.14701
0.16619
0.1214
0.087008
0.10821
0.056378
0.14397
0.13141
0.11807
0.13174
0.12244
0.11153
0.12302
0.076054
0.085961
0.11206
0.14401
0.1278
0.09859
0.054754
-0.033863
-0.11244
-5.35e-05
0.13351
0.11314
0.087544
-0.055749
-0.16681
-0.22344
-0.10908
0.037615
0.13877
0.17777
0.19233
0.16837
0.041717
0.040861
0.025545
0.016326
0.0042778
-0.028453
-0.084483
-0.1649
-0.14287
-0.19573
-0.15938
-0.15417
-0.2
-0.11014
0.033978
-0.071869
-0.1704
-0.14283
-0.013346
-0.1231
-0.13272
-0.015213
0.11877
0.14634
-0.022061
-0.15098
-0.23616
-0.26465
-0.32646
-0.31548
-0.28438
-0.26004
-0.046053
0.031154
-0.016014
-0.14053
-0.19435
-0.028084
0.079147
0.14279
0.17576
0.21675
0.13489
0.046203
0.015
-0.031307
-0.07206
-0.19899
-0.27692
-0.23238
-0.22185
-0.13878
-0.14845
-0.071689
0.16723
0.30289
0.29169
0.26793
0.29949
0.21066
0.061178
0.021497
0.079475
0.076908
0.03892
0.066356
0.073774
0.13334
-0.026222
-0.09983
0.062715
0.17238
0.2326
0.1962
0.13627
0.16671
0.21819
0.22905
0.13861
0.17064
0.13065
0.15763
0.19001
0.14705
0.12357
0.12712
0.11557
0.027155
-0.027911
-0.055437
-0.085248
-0.0081471
0.031172
-0.050788
-0.090438
-0.02949
0.063141
0.075344
0.13048
0.12704
0.15424
0.19201
0.18417
0.13799
0.15339
0.069482
0.11401
0.074385
0.08948
0.033862
-0.10729
-0.21739
-0.30183
-0.24727
-0.19298
-0.24463
-0.24587
-0.22816
-0.26069
-0.17478
-0.12184
-0.11274
-0.15323
-0.24124
-0.24756
-0.23981
-0.21624
-0.16669
-0.16285
-0.2306
-0.30226
-0.26522
-0.17995
-0.20055
-0.2185
-0.16396
-0.048526
-0.060819
-0.11695
-0.16958
-0.13679
-0.24608
-0.24774
-0.13381
-0.1008
-0.082719
-0.12985
-0.16266
-0.044935
-0.074835
-0.080137
-0.11064
-0.051347
-0.024105
0.11944
0.047703
0.037334
0.07833
0.06323
0.048656
0.077853
0.18678
0.22706
0.22722
0.20934
0.21099
0.18833
0.20029
0.21441
0.19595
0.21982
0.19296
0.17202
0.13479
0.14231
0.080532
0.084958
0.061707
0.12149
0.12005
0.13253
0.12913
0.17153
0.12348
-0.0020926
-0.094221
-0.052243
0.098737
0.18009
0.20654
0.16019
0.15403
0.16526
0.17331
0.14078
0.16211
0.15266
0.13533
0.064386
-0.00021359
0.059784
0.11755
0.08401
0.05769
0.10905
0.10954
0.16285
0.14799
0.09061
0.040658
-0.12217
-0.16765
-0.23399
-0.17882
-0.089037
-0.19499
-0.18481
-0.094438
-0.10253
-0.063034
-0.17611
-0.19434
-0.16992
-0.21522
-0.23405
-0.17699
-0.19807
-0.15022
-0.030454
0.085305
0.089388
0.12828
0.12458
-0.061428
-0.11076
-0.062554
-0.059878
-0.048177
-0.14772
-0.24819
-0.23565
-0.12658
0.03452
0.012167
-0.12129
-0.24159
-0.21151
-0.13418
-0.13165
-0.19837
-0.24641
-0.24328
-0.20752
-0.087618
0.14237
0.20448
0.2423
0.19776
0.13835
0.094503
0.16977
0.14594
0.12469
0.092864
-0.014151
-0.023295
0.02521
0.0079147
0.11488
0.13938
0.16529
0.11313
0.14605
0.064067
0.16317
0.25409
0.21302
0.2337
0.16195
0.14544
0.14645
0.14076
0.20454
0.074829
0.15689
0.12728
0.073762
0.013464
0.021159
-0.032711
0.061398
0.023528
-0.073475
-0.078997
-0.084784
-0.044582
-0.018408
-0.061899
-0.11866
-0.099626
-0.076571
-0.077851
-0.074265
-0.10674
-0.065493
-0.078269
-0.046762
-0.10215
-0.042946
-0.10646
-0.10166
-0.088155
-0.12175
-0.093916
-0.12175
-0.143
-0.12063
-0.082562
-0.083386
-0.10647
-0.083676
-0.040892
-0.10481
-0.10739
-0.07623
-0.07361
-0.074535
-0.067907
-0.018003
-0.035297
-0.098151
-0.10295
-0.10002
-0.13183
-0.10373
-0.037758
-0.08891
-0.044409
-0.021997
-0.12146
-0.1335
-0.071023
-0.013273
0.045181
0.059081
0.021393
0.068736
0.042822
0.067772
0.11995
0.054576
0.040484
0.026056
0.089121
0.05895
-0.021255
-0.08017
-0.053686
-0.053885
-0.018559
0.024573
0.038714
0.091048
0.070334
0.19263
0.21634
0.22993
0.25794
0.24826
0.24789
0.25771
0.23851
0.17406
0.14405
0.19733
0.23354
0.22567
0.26059
0.27723
0.28668
0.25012
0.18403
0.23854
0.25879
0.2216
0.25555
0.28496
0.21607
0.13018
0.073428
0.12151
0.16213
0.015714
-0.10119
-0.19107
-0.23278
-0.25131
-0.32587
-0.2753
-0.2411
-0.17246
-0.10741
0.00093715
-0.083869
-0.11925
-0.14283
-0.17988
-0.2036
-0.26164
-0.19599
-0.13666
-0.15682
-0.19484
-0.18224
-0.14397
-0.045224
-0.11366
-0.098213
-0.094949
-0.083146
-0.11422
-0.17321
-0.1821
-0.17992
-0.079941
-0.10975
-0.055873
-0.077619
-0.063964
-0.16052
-0.18913
-0.14389
-0.10404
-0.052488
-0.075229
-0.045915
-0.03532
-0.027659
-0.044455
-0.0029283
0.012839
-0.003574
0.14155
0.10767
0.076738
-0.046901
-0.00091858
-0.076781
-0.050144
-0.1171
-0.049254
-0.0683
-0.035988
-0.1175
0.024947
-0.0052898
0.0050017
0.11456
0.19806
0.21892
0.14782
-0.028069
-0.13124
-0.0063224
0.086673
0.14843
0.072733
-0.043166
-0.10493
-0.0901
-0.10591
-0.081741
-0.011199
-0.0021171
0.049595
0.060882
-0.03273
-0.07745
-0.080945
0.013566
0.022885
-0.022224
-0.0051038
-0.074782
-0.11236
-0.11351
-0.087777
0.057128
0.0488
0.055148
0.071229
0.021932
0.0013344
-0.095591
-0.094382
-0.10449
-0.037117
0.025588
0.035679
0.011527
-0.032823
-0.0030663
0.081191
0.0087179
0.0022238
-0.062654
-0.018683
-0.069634
-0.073617
-0.085569
-0.096769
0.071557
0.095926
0.018476
-0.038196
-0.022568
-0.00039515
-0.066817
-0.10679
-0.1275
-0.052056
-0.076504
-0.051375
-0.0094612
0.023854
0.057174
0.069904
-0.041116
-0.16688
-0.11213
0.11311
0.14885
0.085543
-0.0013882
-0.11154
-0.12092
-0.032662
0.058315
-0.047178
-0.032811
-0.08232
-0.060037
0.0039314
0.060501
-0.014128
-0.10424
-0.21432
-0.10845
-0.069377
-0.056478
-0.045645
0.058875
0.24277
0.31379
0.22014
0.13751
0.12732
0.084746
0.0018549
-0.021729
-0.056467
-0.090967
-0.099463
-0.15053
-0.1132
-0.02221
0.05598
0.095955
-0.025011
-0.031075
-0.09689
-0.12912
-0.11393
-0.12381
0.064594
0.0014592
-0.13934
0.0014032
-0.002956
-0.08898
-0.14684
-0.12972
-0.10511
-0.07178
-0.075699
-0.059742
-0.049384
-0.078147
-0.072914
-0.031655
-0.13551
-0.16102
-0.16723
-0.065275
-0.00080358
-0.0086301
-0.13545
-0.083471
0.059568
0.14638
0.30124
0.32069
0.3186
0.28061
0.24515
0.056949

## Sheet: Figure5_supplement1C_Run2_mean
-0.049263
-0.12131
-0.21448
-0.27033
-0.29393
-0.27377
-0.28081
-0.23294
-0.21762
-0.1843
-0.21791
-0.20242
-0.20062
-0.2141
-0.22753
-0.20147
-0.15838
-0.11397
-0.094727
-0.09037
-0.090041
-0.05833
-0.061436
-0.076062
-0.060286
0.06466
0.24962
0.35308
0.29745
0.28099
0.1709
0.1745
0.20779
0.23321
0.24927
0.25003
0.15305
0.079808
0.020234
0.040333
0.09817
0.19163
0.18429
0.12097
0.069958
0.053655
0.073972
0.013645
0.056932
0.038905
0.077815
0.049573
-0.059492
0.033273
0.089979
0.16284
0.095079
0.093453
0.055157
0.0068673
-0.01533
0.01541
0.074717
0.09703
0.081237
0.076812
0.048293
-0.018002
-0.040853
-0.10486
-0.0482
0.036292
0.035952
-0.03817
-0.011706
0.10243
0.17752
0.093775
0.14383
0.13388
0.079101
0.004549
-0.088426
-0.043402
-0.13155
-0.13135
-0.13822
-0.17917
-0.17297
-0.10444
-0.070524
-0.099333
-0.09445
-0.11496
0.0092948
0.13121
0.061151
0.0017783
-0.029199
-0.071922
-0.072035
-0.10958
-0.046105
0.026018
-0.026285
-0.030013
-0.0741
-0.040466
-0.019129
-0.052962
-0.05818
-0.0095368
0.020371
0.022024
0.012782
0.031095
0.076924
0.11214
0.068317
0.035967
0.019358
0.14949
0.097412
0.055194
0.062787
0.10861
0.09798
0.027376
0.042763
0.079263
0.12104
0.19605
0.25071
0.17896
0.079189
0.044489
0.05745
-0.05712
-0.17039
-0.24412
-0.24969
-0.13558
-0.067509
0.00091432
0.04161
0.082733
0.099318
0.14424
0.10131
0.099799
-0.013518
-0.10646
-0.08133
-0.088887
-0.0098478
0.06408
0.0087856
-0.054908
-0.082653
-0.10919
-0.18416
-0.25645
-0.26299
-0.21436
-0.221
-0.19913
-0.22019
-0.2233
-0.19926
-0.13119
-0.043237
-0.066473
-0.094633
-0.12473
-0.11599
-0.08292
-0.024454
0.031957
0.029853
0.17745
0.16726
0.1278
0.03291
0.079339
0.15878
0.20016
0.19713
0.11511
0.1138
0.11837
0.10254
0.094797
0.072728
-0.017643
-0.028078
-0.10085
-0.079075
0.0031017
0.026525
0.054276
0.028449
0.069601
0.0027405
-0.036417
-0.075573
-0.056654
-0.026413
-0.0077478
0.04626
0.039499
0.07813
0.098638
0.18867
0.16075
0.084245
0.011928
-0.043087
0.0064917
0.0059722
-0.052978
-0.068188
-0.010092
0.029733
0.003107
0.09935
0.020946
-0.0022209
0.034968
0.026859
0.070608
0.13145
0.15228
0.14032
0.077395
0.069442
0.12681
0.1208
0.077901
0.054068
0.072774
0.072421
0.078588
0.036139
0.018985
0.11616
0.14836
0.21592
0.20331
0.22481
0.24448
0.15787
0.15177
0.021352
-0.14231
-0.2595
-0.27501
-0.19152
-0.17739
-0.202
-0.19804
-0.23779
-0.28482
-0.28213
-0.30614
-0.15048
-0.065013
0.062542
0.10826
0.12496
0.10721
0.049324
0.088326
0.057446
0.083159
0.15097
0.15005
0.13399
-0.023559
-0.055241
-0.11734
-0.21597
-0.27678
-0.23901
-0.17056
-0.1803
-0.11902
0.13161
0.26005
0.30445
0.31955
0.25792
0.20273
0.20913
0.20829
0.25952
0.20925
0.1982
0.17547
0.18955
0.19643
0.17848
0.22817
0.22584
0.11908
0.0014126
-0.096728
-0.091564
-0.18392
-0.16408
-0.23856
-0.27514
-0.25001
-0.29003
-0.18783
-0.2137
-0.24222
-0.27831
-0.31329
-0.3183
-0.3155
-0.28685
-0.30192
-0.25516
-0.09908
0.062007
0.082225
0.12016
0.18569
0.054636
0.068522
0.05792
0.050611
0.0094825
0.037862
0.0083481
-0.056426
-0.1011
-0.11743
-0.12344
-0.17821
-0.14823
-0.18427
-0.074953
0.098026
0.23352
0.24743
0.22053
0.22287
0.26003
0.13722
-0.073758
-0.084174
-0.13004
-0.18401
-0.16821
-0.14483
-0.17397
-0.098537
-0.080236
-0.1003
0.10361
0.24984
0.25586
0.1301
0.044978
-0.019847
-0.0019112
-0.078062
-0.13505
-0.18036
-0.20939
-0.26856
-0.19916
-0.021723
0.048312
0.046483
0.025666
0.066835
-0.044595
-0.12267
0.023543
0.048891
0.011029
0.087277
0.077178
-0.091309
-0.17885
-0.27094
-0.29924
-0.1689
0.041722
0.2021
0.17968
0.15773
0.164
0.087343
0.012626
0.021571
0.002978
-0.033169
-0.049279
-0.097699
-0.18273
-0.23662
-0.29458
-0.30342
-0.27613
-0.1592
-0.078593
-0.11177
-0.16241
-0.19979
-0.18492
-0.18544
-0.0014979
-0.0039271
-0.09081
-0.12149
-0.1182
-0.098781
0.00044728
-0.028503
0.080186
0.18774
0.24494
0.27043
0.17825
0.087541
0.1574
0.20745
0.26344
0.25824
0.21446
0.19289
0.18149
0.14087
0.042772
-0.0018518
0.014023
0.046965
0.047183
0.14814
0.12532
0.098572
0.016174
0.10403
0.045973
0.0080045
0.039107
0.036559
-0.022403
0.00050283
-0.025932
0.015608
0.076432
0.15618
0.15853
0.053326
0.059354
0.094259
0.0038122
-0.0049956
-0.07409
0.020515
0.08346
0.11766
0.09073
0.065487
0.0014765
-0.015249
0.0052636
0.049641
0.060439
0.059856
-0.0054817
0.00081501
0.096259
0.044483
-0.017786
-0.0057742
0.024842
0.045947
-0.02232
0.013084
0.012382
-0.0092542
-0.020715
0.020104
0.0075821
-0.06458
-0.036725
-0.027944
-0.04325
0.0075278
0.04891
0.084272
0.10811
0.10523
0.050796
0.097009
0.079152
0.044162
-0.010154
-0.075554
-0.064298
-0.044019
-0.039183
-0.10038
-0.0049009
0.023615
0.028465
0.094065
0.060217
0.02637
0.027648
0.051921
0.053711
-0.023814
0.0034456
-0.00088688
0.015225
0.02278
0.19713
0.23821
0.19984
0.1621
0.13096
0.0077914
-0.043424
-0.082426
-0.11449
-0.12092
-0.074884
-0.0164
-0.025164
-0.061159
-0.045015
-0.068093
-0.076843
-0.024686
-0.02796
0.062593
0.055903
0.014616
-0.027808
-0.016504
-0.049115
-0.042259
-0.12914
-0.058565
-0.044166
-0.12603
-0.1702
-0.19292
-0.13513
-0.088578
-0.064369
-0.085848
-0.042007
-0.025108
-0.01133
-0.0097837
0.0099406
-0.016775
0.018176
-0.054619
-0.056283
-0.059479
-0.081588
-0.13852
-0.026135
-0.056809
-0.064206
-0.062486
0.07118
0.038645
0.022788
0.016589
0.011362
-0.070432
-0.022689
-0.023677
-0.096939
-0.088823
-0.022093
-0.046227
-0.071587
-0.054385
-0.052676
-0.09596
-0.076054
-0.073142
-0.11741
-0.092351
-0.087996
-0.0046421
-0.045632
0.007876
-0.02495
-0.080976
-0.10441
-0.13102
-0.17835
-0.18708
-0.20374
-0.23571
-0.20499
-0.1586
-0.1696
-0.076719
-0.010714
0.05666
0.016454
-0.0019144
-0.048183
-0.079881
-0.14732
-0.19299
-0.1779
-0.13916
-0.13043
-0.13567
-0.12276
-0.12819
-0.14169
-0.15097
-0.11223
-0.14477
-0.088205
-0.14724
-0.13249
-0.025982
0.19226
0.29405
0.29613
0.28252
0.31846
0.23592
0.24545
0.19544
0.21573
0.16151
0.17154
0.13184
0.13895
0.17746
0.19791
0.10681
0.12407
0.089198
0.14644
0.094551
-0.026604
-0.040128
-0.051465
0.043881
0.16248
0.17365
0.1769
0.18729
0.16332
0.1925
0.1266
0.097069
0.091794
0.15632
0.069944
-0.012891
-0.022924
-0.010607
0.041643
0.047883
0.027046
0.059387
0.013805
-0.019558
-0.093904
-0.14104
-0.19978
-0.20396
-0.25506
-0.25474
-0.22683
-0.046936
0.16382
0.17449
0.15451
0.17202
0.19743
0.16247
-0.0084931
-0.051565
-0.074359
0.040644
0.12953
0.12645
0.033936
0.0077344
-0.098627
-0.21869
-0.28737
-0.33361
-0.28952
-0.17961
0.031825
0.091942
0.13336
0.21551
0.16645
0.078977
-0.0049207
-0.00015222
-0.12757
-0.14565
-0.15343
-0.19423
-0.1604
-0.10312
-0.042114
-0.0054571
-0.10636
-0.12763
-0.047629
-0.0057315
0.024136
-0.0046576
0.058859
0.050484
0.070936
0.14617
0.22995
0.23651
0.22896
0.24452
0.2902
0.25205
0.11885
0.12522
0.033513
-0.052849
-0.036917
0.027646
0.14428
0.13452
-0.015109
-0.0079945
0.10045
0.18371
0.12929
0.021514
-0.018368
0.072225
0.062407
-0.026452
-0.12739
-0.16855
-0.19656
-0.18947
-0.14158
0.027546
0.11797
0.1176
0.10684
0.021018
-0.11662
-0.13457
-0.13065
-0.15527
-0.030171
0.10286
-0.0062906
-0.081005
-0.19398
-0.14054
-0.020258
-0.046847
-0.12349
-0.17736
-0.25842
-0.25864
-0.24576
-0.15199
-0.058111
0.017998
-0.054857
-0.05729
-0.10452
-0.1412
-0.16757
-0.17456
0.012883
0.13809
0.15801
0.18044
0.10088
0.13933
0.16604
0.17203
0.10714
-0.03843
-0.18852
-0.23436
-0.16297
-0.11144
0.011884
0.10171
0.08843
0.015438
-0.022344
-0.039524
-0.14238
-0.148
-0.17301
-0.1811
-0.20018
-0.22058
-0.23195
-0.21018
-0.2089
-0.22012
-0.15275
-0.064173
-0.042659
-0.069409
-0.10539
-0.042863
-0.070273
-0.084972
-0.025683
0.042289
-0.0019381
-0.0015401
0.023784
0.028971
0.16997
0.20404
0.1902
0.19983
0.17676
0.1659
0.17281
0.14629
0.074774
0.076933
-0.0026915
-0.081775
-0.071704
-0.081677
-0.13341
-0.080881
-0.029315
0.029993
0.018742
0.11048
0.13237
0.16739
0.1843
-0.014423
0.005059
-0.055883
-0.059699
0.004505
0.08858
0.098459
-0.040984
-0.10734
-0.10463
0.061266
0.081354
0.040248
-0.0515
-0.014826
0.011739
0.12093
0.15366
0.033114
0.024049
0.083193
0.10246
0.052269
-0.048367
-0.076817
-0.14726
-0.1556
-0.061966
-0.095556
-0.093586
0.055987
0.073915
0.011133
0.0050937
-0.11332
-0.1498
-0.19417
-0.19975
-0.15987
-0.10589
-0.057767
-0.10657
-0.18326
-0.139
-0.16011
-0.17536
-0.1181
-0.013234
-0.020064
0.070007
0.056996
0.043995
0.08407
0.19631
0.14385
0.1403
0.10113
0.13607
0.093673
0.11853
0.20834
0.28414
0.21271
0.16023
0.10899
