# Supplementary material for: A generalized cortical activity pattern at internally generated mental context boundaries during unguided narrative recall
Source: eLife. 2022 May 30;11:e73693. doi: 10.7554/eLife.73693 (PMC9177147; doi:10.7554/eLife.73693)
Supplement: Figure 5—figure supplement 2—source data 1. [file elife-73693-fig5-figsupp2-data1.xlsx]

## Sheet: Figure5_supplement2
	PMC	AUD
S1	-0.039133	-0.24349
S2	-0.072037	-0.33973
S3	-0.042999	-0.21052
S4	-0.023564	-0.19617
S5	0.035725	-0.2626
S6	0.015359	-0.15247
S7	-0.055749	-0.29852
S8	0.031443	-0.26956
S9	0.046431	-0.23661
S10	-0.026743	-0.15221
S11	0.007287	-0.25839
S12	-0.05474	-0.21888
S13	-0.0016953	-0.23498
S14	-0.029179	-0.23076
S15	-0.029804	-0.23666
