# Supplementary material for: A generalized cortical activity pattern at internally generated mental context boundaries during unguided narrative recall
Source: eLife. 2022 May 30;11:e73693. doi: 10.7554/eLife.73693 (PMC9177147; doi:10.7554/eLife.73693)
Supplement: Figure 5—source data 1. [file elife-73693-fig5-data1.xlsx]

## Sheet: Figure5
	PMC	AUD
S1	-0.3793	0.40295
S2	-0.0057226	0.56204
S3	0.30332	0.25552
S4	0.050047	0.22137
S5	-0.33726	0.42102
S6	-0.22411	0.38787
S7	-0.091891	0.54843
S8	-0.002251	0.37469
S9	-0.053055	0.25054
S10	-0.12314	0.42911
S11	-0.30576	0.29188
S12	0.032919	0.13415
S13	0.0071418	0.65917
S14	-0.19657	0.29208
S15	-0.0050455	0.39038
