# Supplementary material for: A generalized cortical activity pattern at internally generated mental context boundaries during unguided narrative recall
Source: eLife journal article supplement (doi:10.7554/elife.73693), 2022-05-30

**A****Encoding**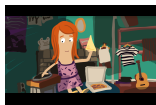**Spoken recall**

*The second clip was an animation...*

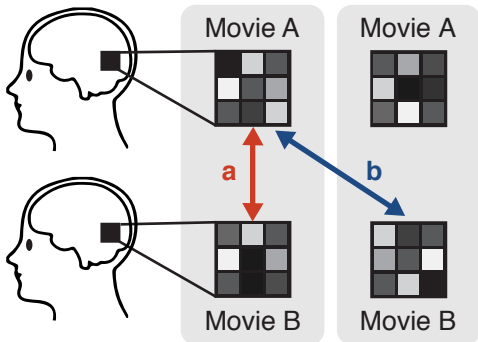**B****Encoding-Recall pattern similarity ( $a > b$ )**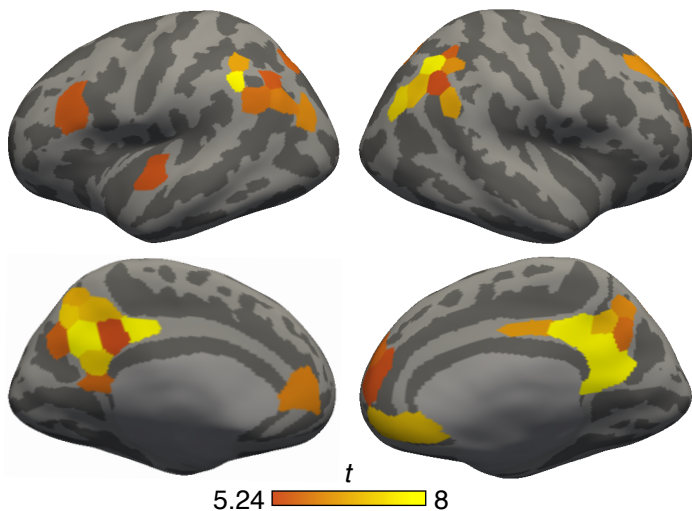

Supplement: supp [file elife-73693-supp-v1.zip]
