# Supplementary material for: A generalized cortical activity pattern at internally generated mental context boundaries during unguided narrative recall
Source: eLife journal article supplement (doi:10.7554/elife.73693), 2022-05-30

**A****Movie stimuli audio amplitudes**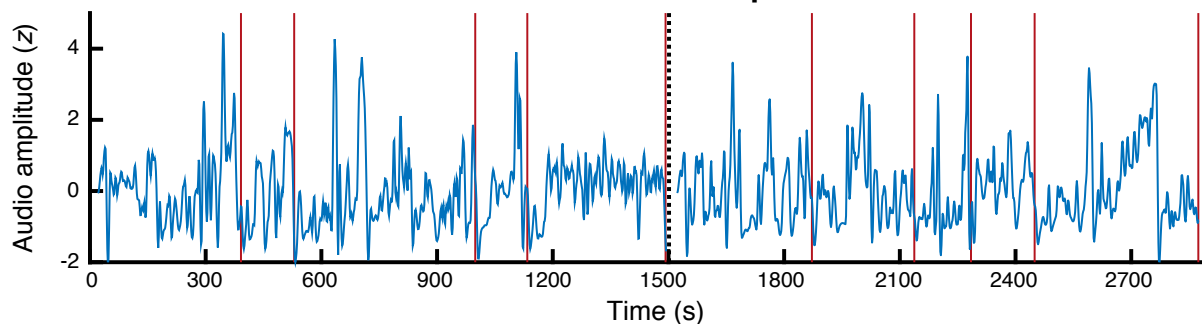**B****PMC recall boundary pattern vs. encoding**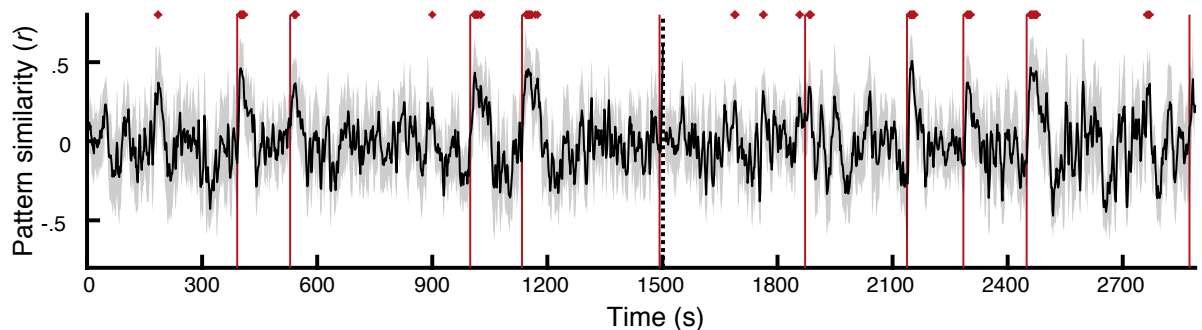**C****AUD recall boundary pattern vs. encoding**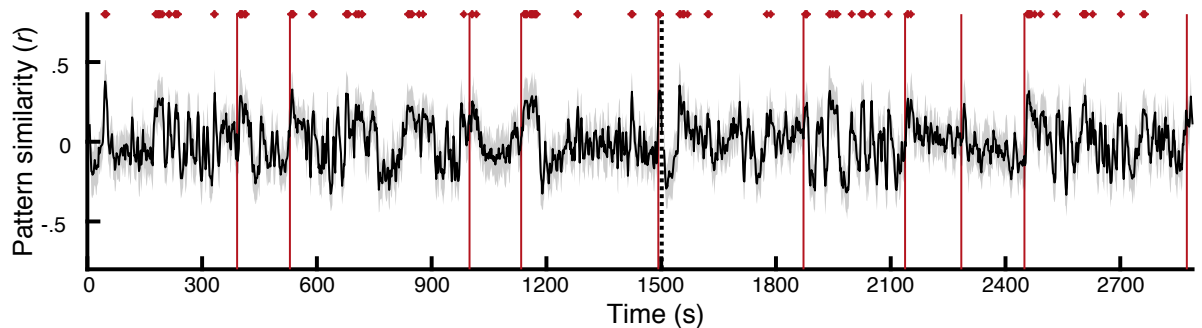

Supplement: supp [file elife-73693-supp-v1.zip]
