# Supplementary figures and images for: A generalized cortical activity pattern at internally generated mental context boundaries during unguided narrative recall
Source: eLife journal article supplement (doi:10.7554/elife.73693), 2022-05-30

**A** Recall-Recall pattern similarity

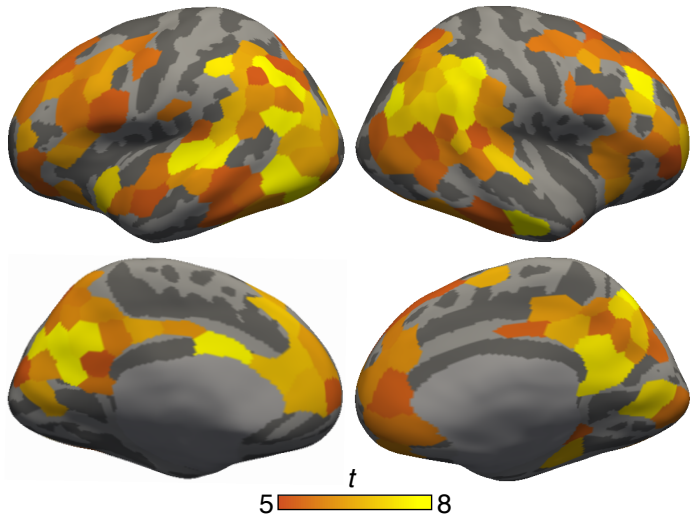

**B** Encoding-Recall pattern similarity

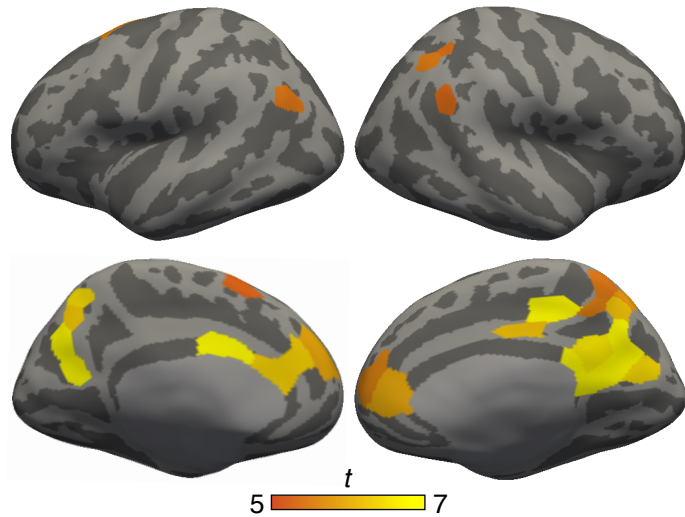

Supplement: supp [file elife-73693-supp-v1.zip]

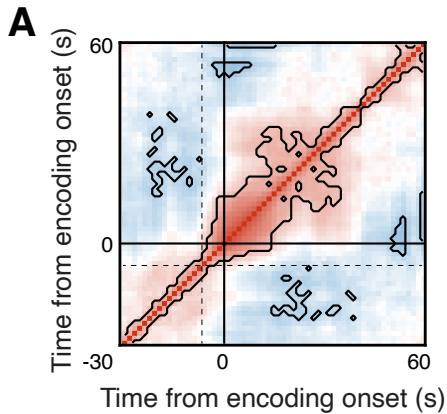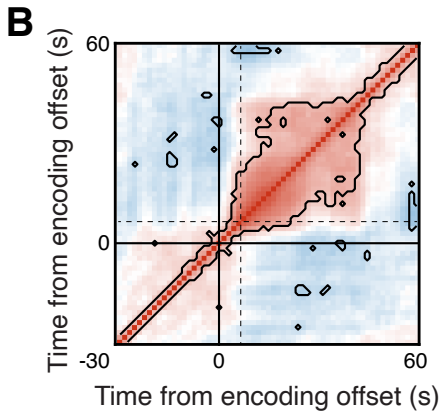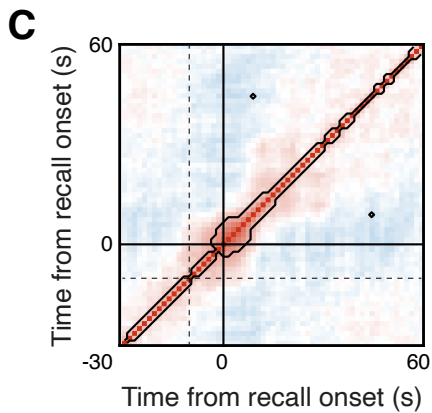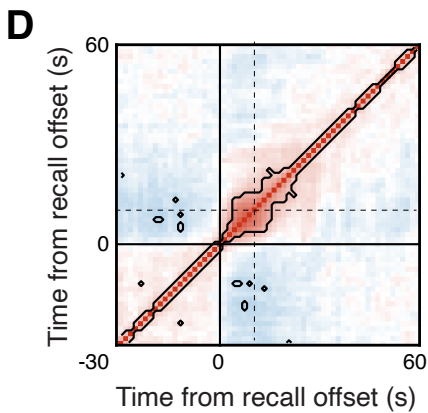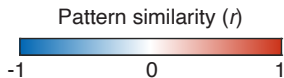

Supplement: supp [file elife-73693-supp-v1.zip]

Posterior medial cortex  
encoding pattern similarity ( $r$ )

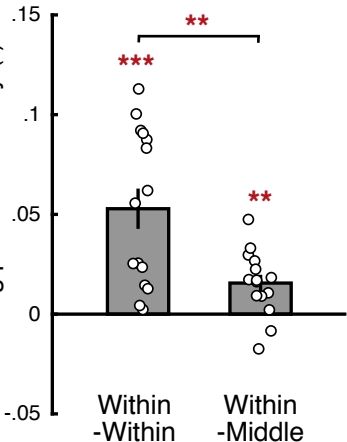

Supplement: supp [file elife-73693-supp-v1.zip]

## Encoding

## Recall

PMC

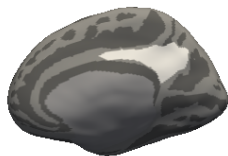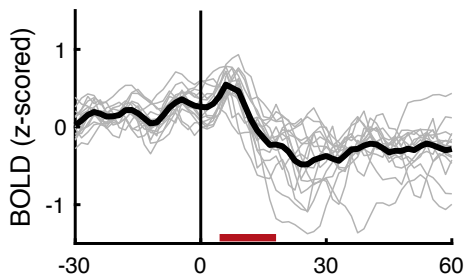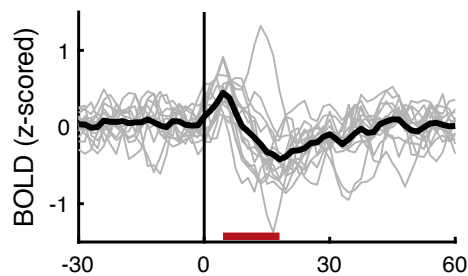

ANG

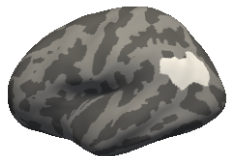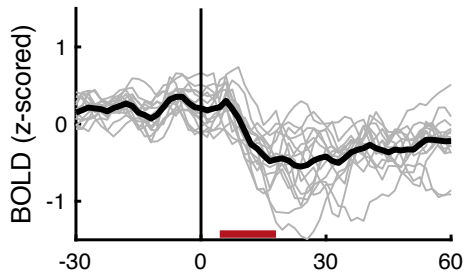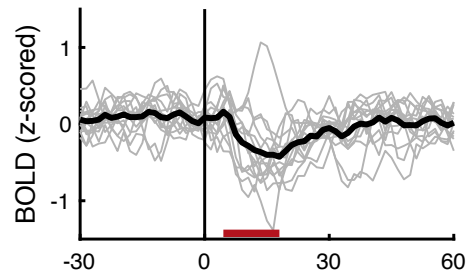

AUD

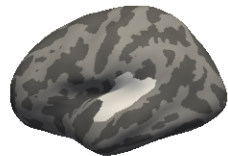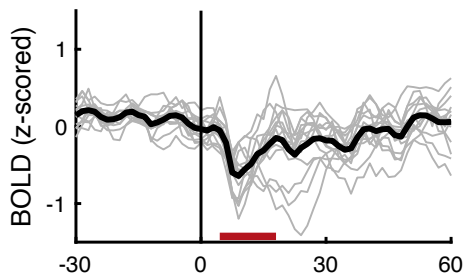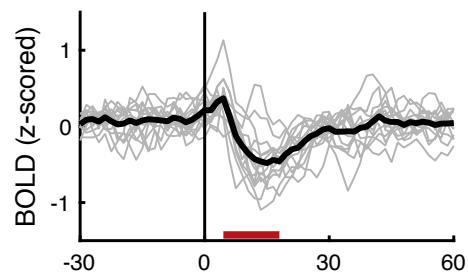

Time from encoding offset (s)

Time from recall offset (s)

Supplement: supp [file elife-73693-supp-v1.zip]

## PMC

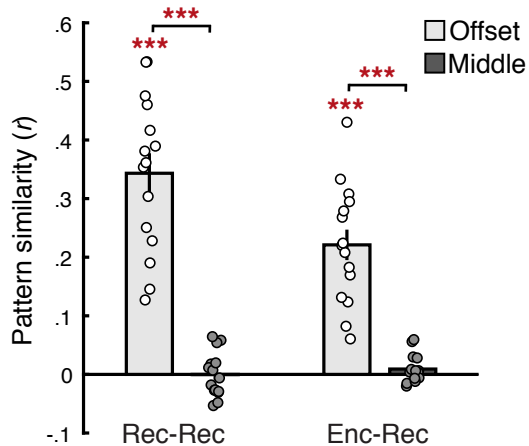

## ANG

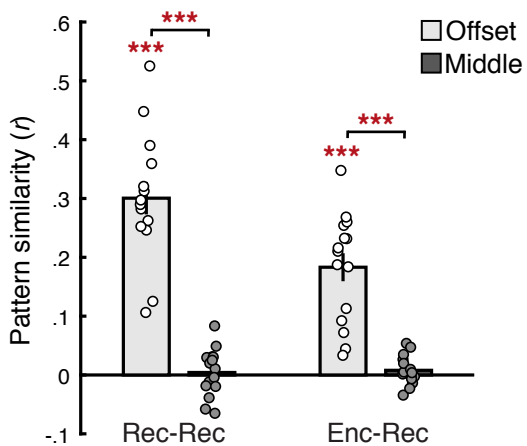

Supplement: supp [file elife-73693-supp-v1.zip]

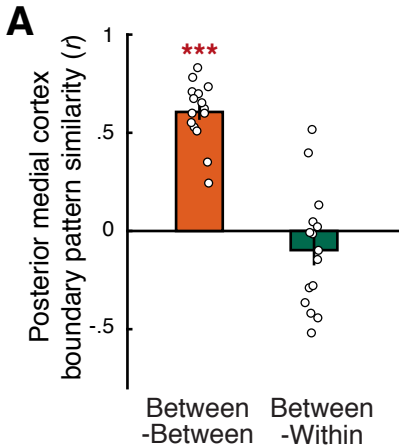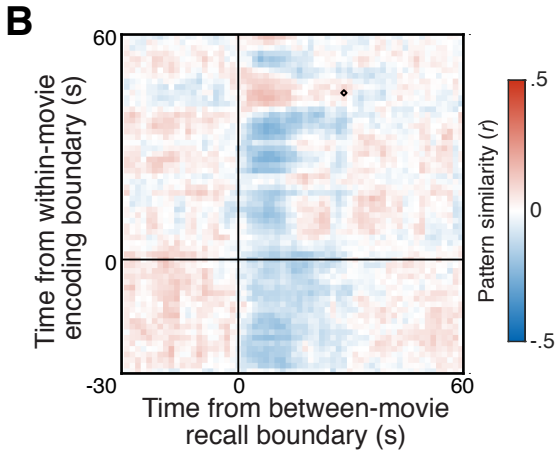

Supplement: supp [file elife-73693-supp-v1.zip]

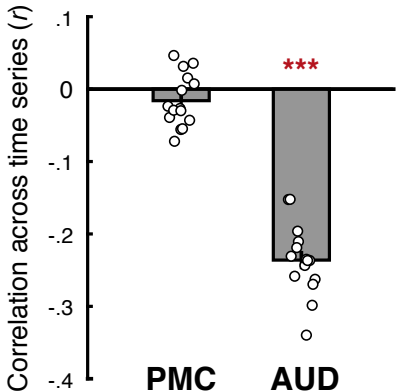

Supplement: supp [file elife-73693-supp-v1.zip]

**A**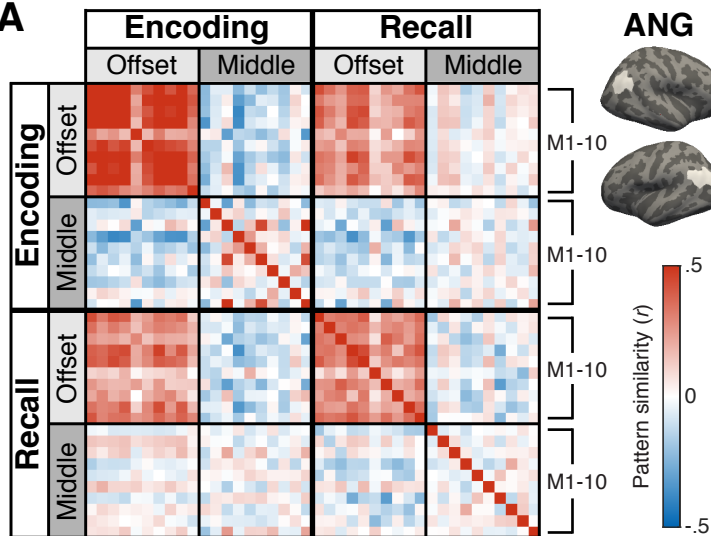**B**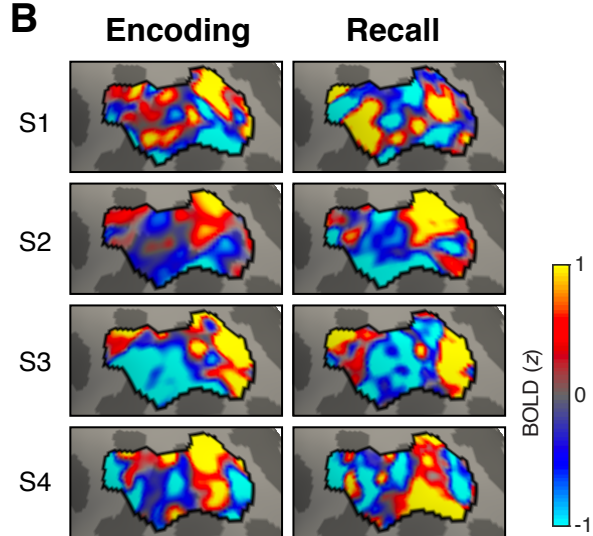**C**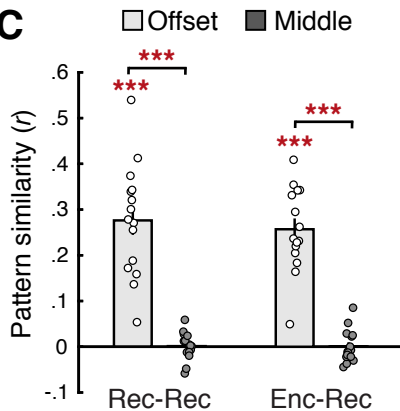**D**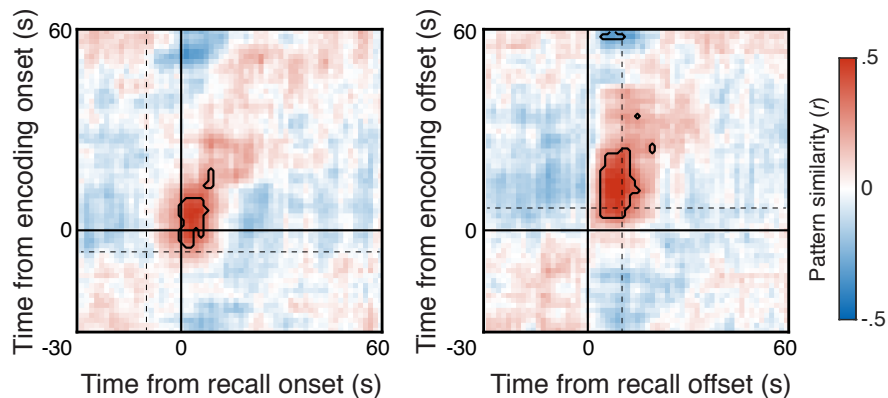

Supplement: supp [file elife-73693-supp-v1.zip]

## Encoding

## Recall

## Encoding

## Recall

S5

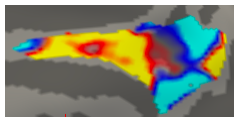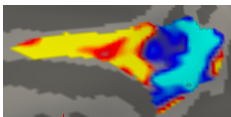

S10

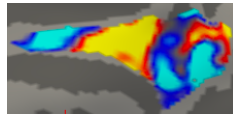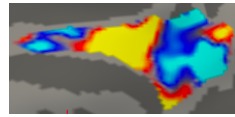

S6

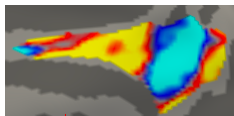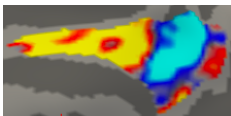

S11

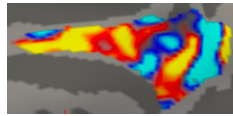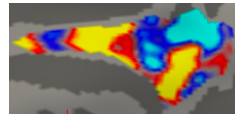

S7

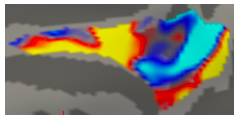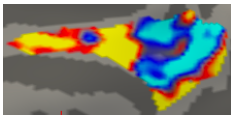

S12

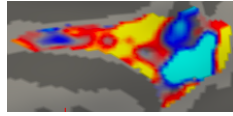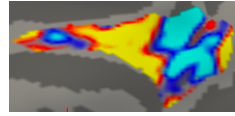

S8

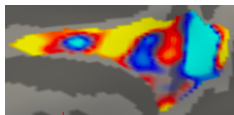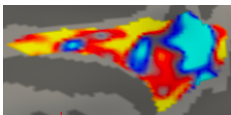

S13

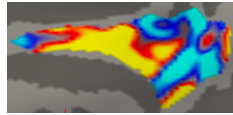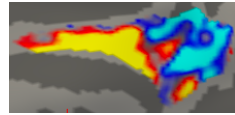

S9

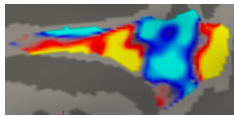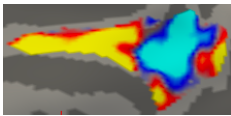

S14

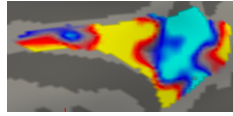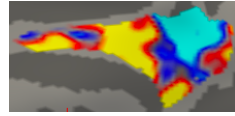

S15

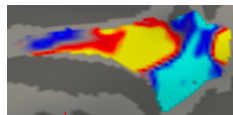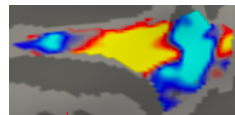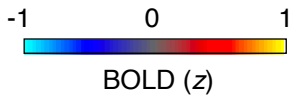

Supplement: supp [file elife-73693-supp-v1.zip]
